# Supplementary material for: Pi-extended hypervalent iodine macrocycles and their supramolecular assembly with Buckminsterfullerene
Source: Royal Society of Chemistry journal article supplement (doi:10.1039/d4tc04251d), 2024-11-05
Supplement: d4tc04251d1.pdf [file d4tc04251d1.pdf]

## Pi-Extended Hypervalent Iodine Macrocycles and Their Supramolecular Assembly with Buckminster Fullerene

Krishna Pandey, Samsul Arafin, Grayson Venus, Eli Jones, Yachu Du, Mina Dumre Pandey, Tahir Awais, Lichang Wang, and Kyle N. Plunkett

School of Chemical and Biomolecular Sciences, Southern Illinois University, Carbondale, IL 62901, United States

kplunkett@chem.siu.edu

### Table of Contents.

|                                                  |               |
|--------------------------------------------------|---------------|
| 1. HIM and C <sub>60</sub> NMR study             | pg. SI2       |
| 2. HIM/C <sub>60</sub> co-crystal information    | pg. SI3a      |
| 3. Assignment of protons in HIM                  | pg. SI4-5     |
| 4. NMR titrations                                | pg. SI6-9     |
| 5. Reversibility experiments                     | pg. SI10-11   |
| 6. Anion binding experiment setup and evaluation | pg. SI12-15   |
| 7. Fluorescence spectra                          | pg. SI15      |
| 8. Experimental                                  | pg. SI16-19   |
| 9. NMR Spectra                                   | pg. SI20-30   |
| 10. Crystallographic Details                     | pg. SI31-255  |
| 11. DFT calculations                             | pg. SI256-270 |

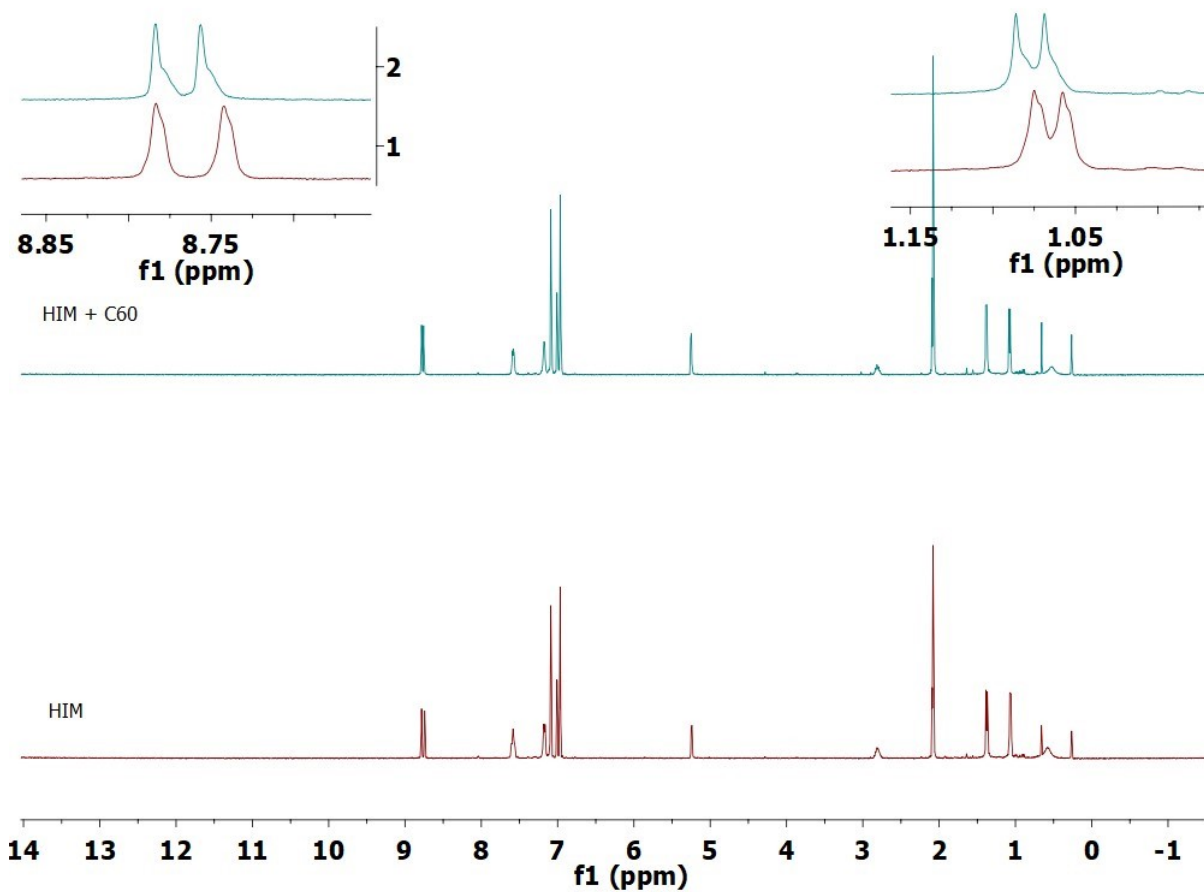

**Figure SI1:**  $^1\text{H}$  NMR (400 MHz, 298 K) of HIM **6** before and after the addition of C<sub>60</sub> in deuterated toluene. The aromatic doublet at 8.74 ppm shifts to 8.76 ppm. Similar shifting was also noticed for methyl signal within the aliphatic region, where the signal originally detected at 1.06 ppm shifted to 1.07 ppm.

### 1.HIM and C<sub>60</sub> NMR study

## 2.HIM/C<sub>60</sub> co-crystal information

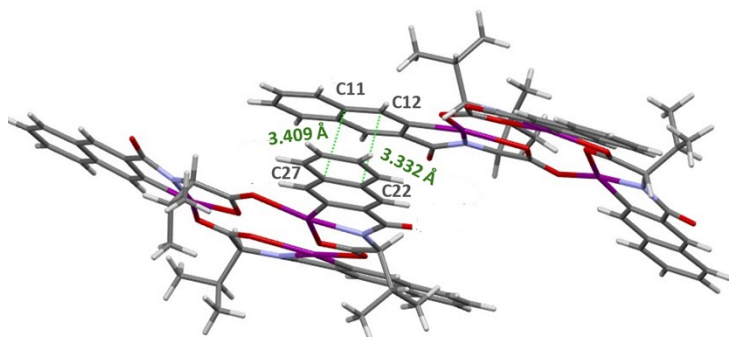

| Carbon atoms | Pi-Pi stacking distance (Å) |
|--------------|-----------------------------|
| C11-C27      | 3.409                       |
| C12-C22      | 3.332                       |

**Table S11.** Pi-Pi stacking distances between Naphthalene HIM-Naphthalene HIM

**Figure S12:** Crystal structure showing  $\pi$ - $\pi$  interactions between naphthalene- naphthalene pairs. The  $\pi$ - $\pi$  distance between C11-C27 and C12-C22 are 3.409Å and 3.332Å.

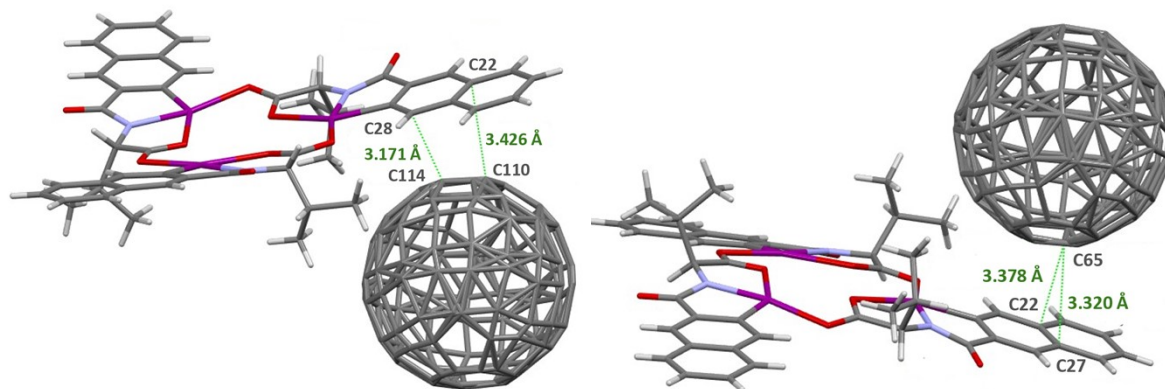

**Figure S13:** Crystal structure showing  $\pi$ - $\pi$  interactions between naphthalene-fullerene pairs. Left) The  $\pi$ - $\pi$  distance between C28-C114 and C22-C110 are 3.171Å and 3.426Å respectively. Right) The  $\pi$ - $\pi$  distance between C22-C65 and C27-C65 are 3.378Å and 3.320Å respectively.

### 3. Assignment of protons in Val-HIM 6b (Naphthalene system)

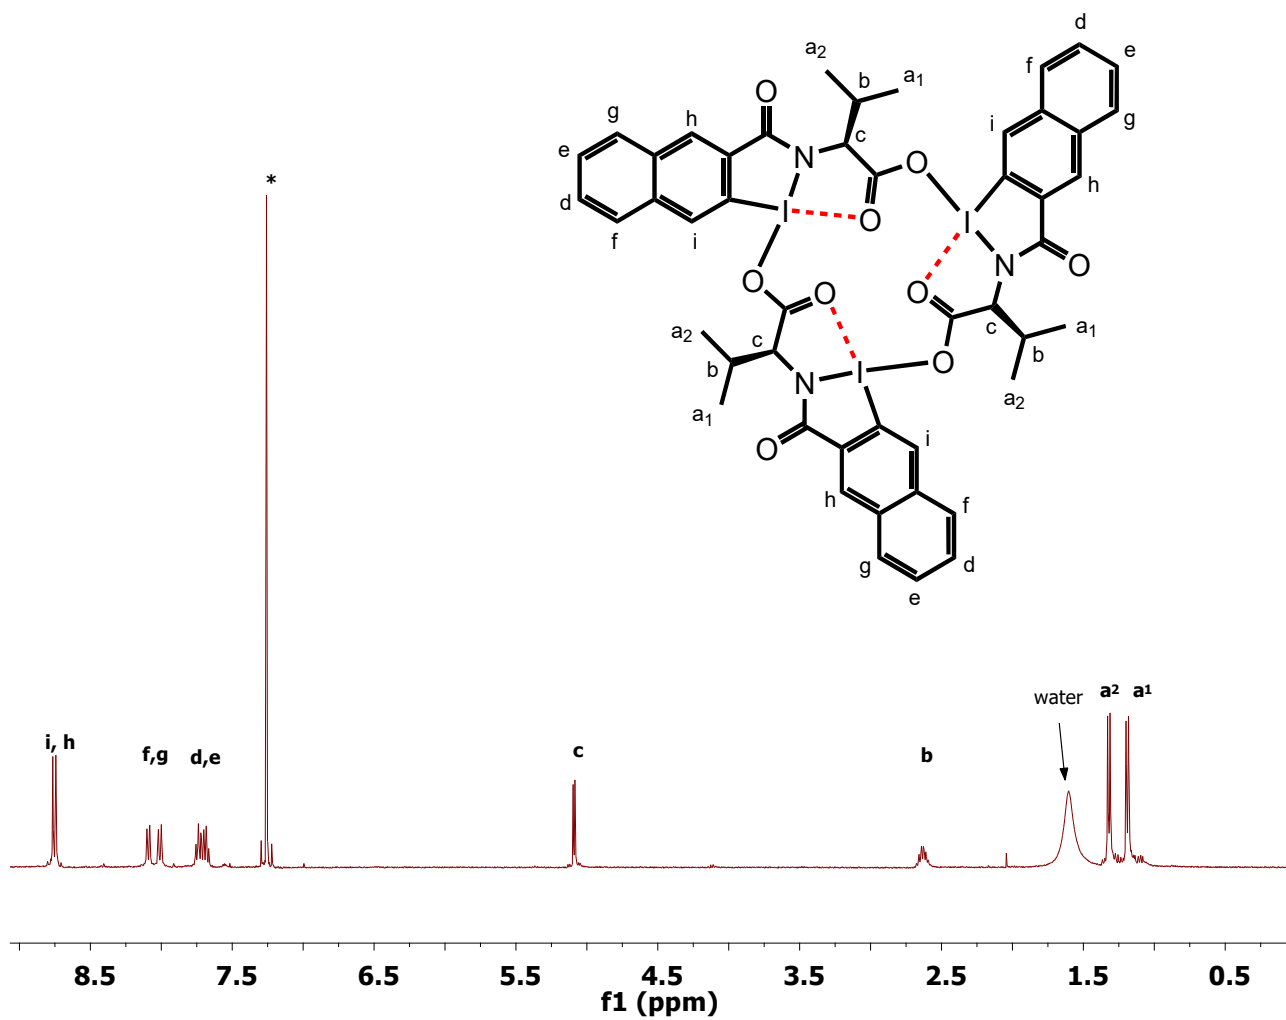

Figure S14: <sup>1</sup>H NMR (400 MHz, 298 K) spectra of **6b** in CDCl<sub>3</sub>. \* Denoted solvent CDCl<sub>3</sub> peak

**Assignment of protons in Val-HIM 6c (Anthraquinone system)**

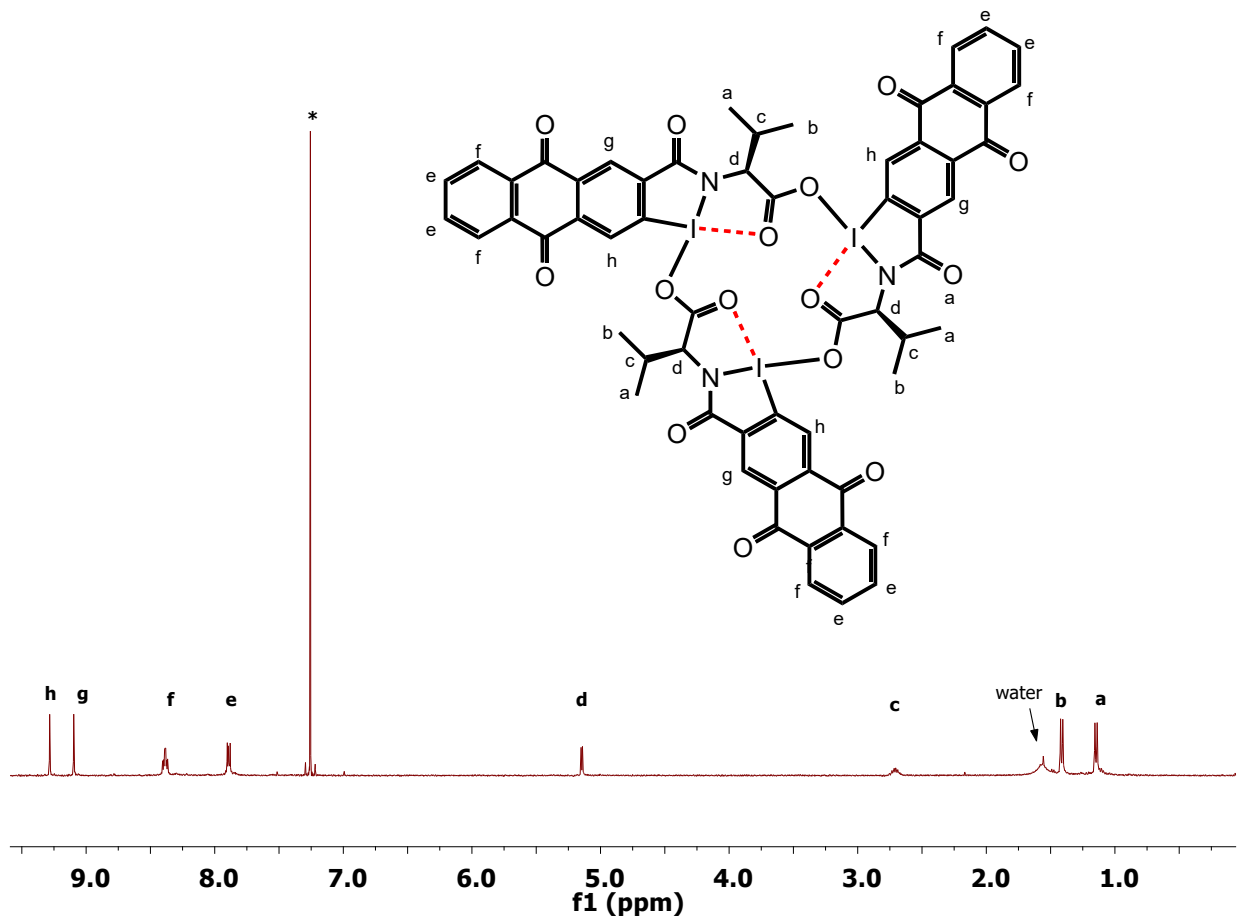

**Figure S15:** <sup>1</sup>H NMR (400 MHz, 298 K) spectra of 6c in CDCl<sub>3</sub>. \*Residual CHCl<sub>3</sub> peak from the NMR

## 4.NMR Titrations

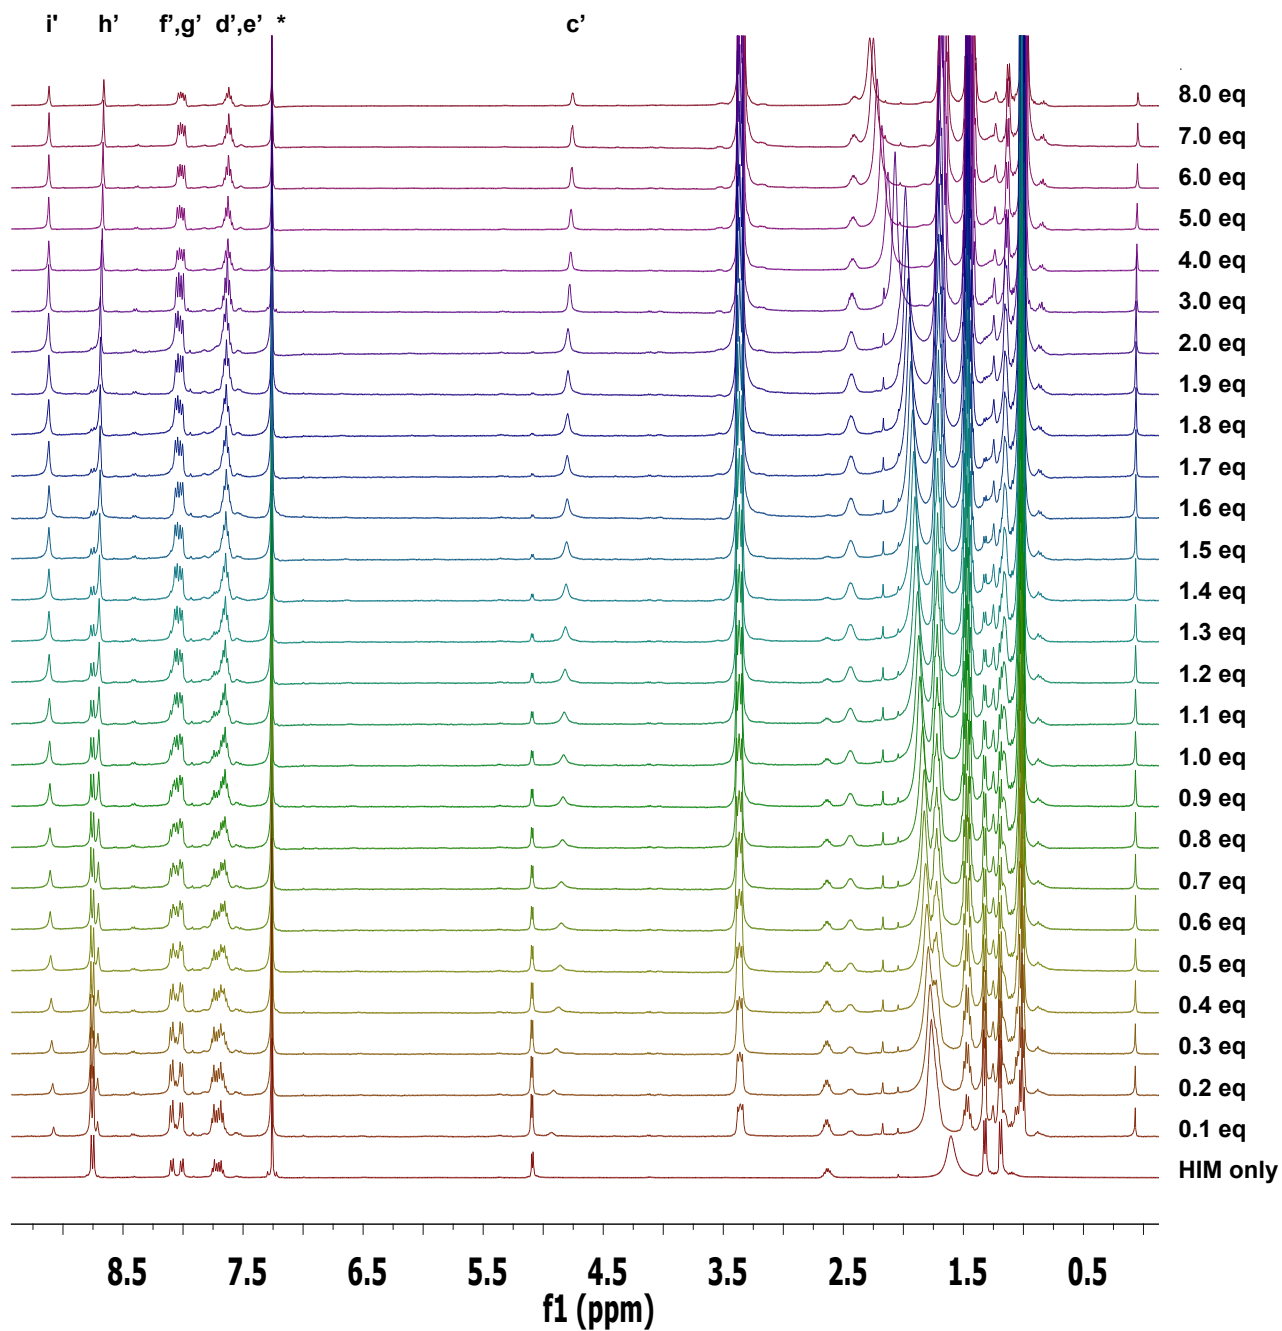

**Figure SI6:**  $^1\text{H}$  NMR (400 MHz, 298 K) titration of **6b** with TBA(Cl) at an incremental equivalency (0 to 8 equivalents TBA(Cl) in  $\text{CDCl}_3$ . \*Residual  $\text{CHCl}_3$  peak from the NMR solvent.

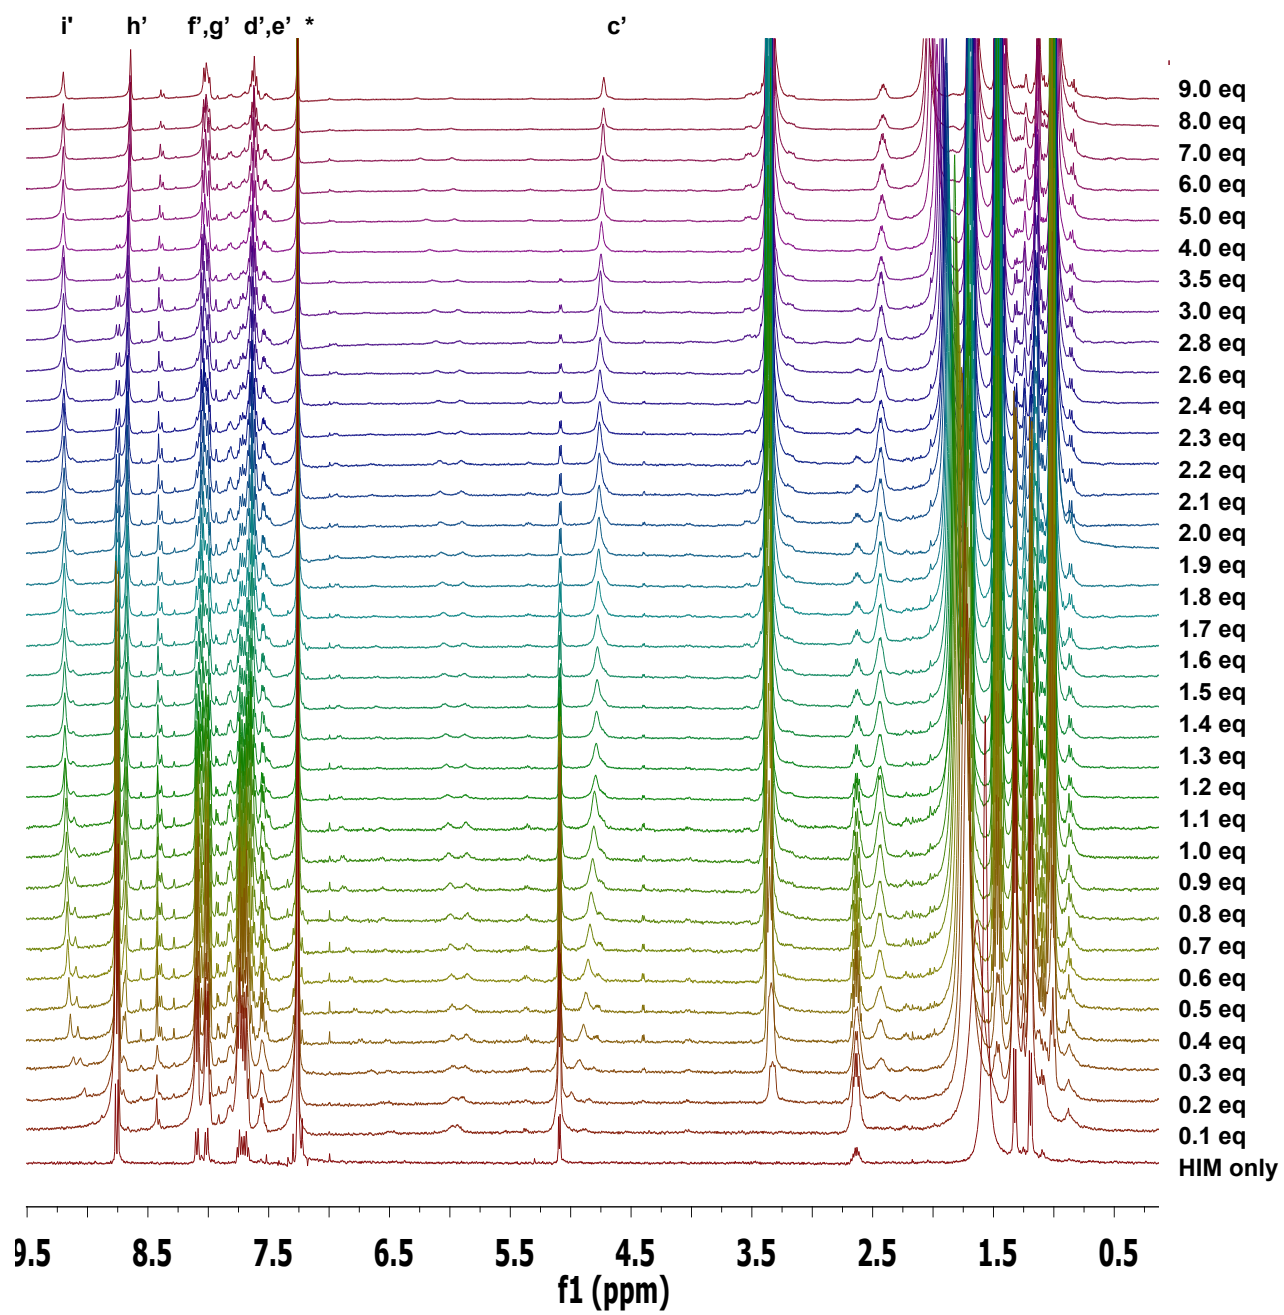

**Figure SI7:** <sup>1</sup>H NMR (400 MHz, 298 K) titration of **6b** with TBA(Br) at an incremental equivalency (0 to 9 equivalents TBA(Br) in CDCl<sub>3</sub>). \*Residual CHCl<sub>3</sub> peak from the NMR solvent.

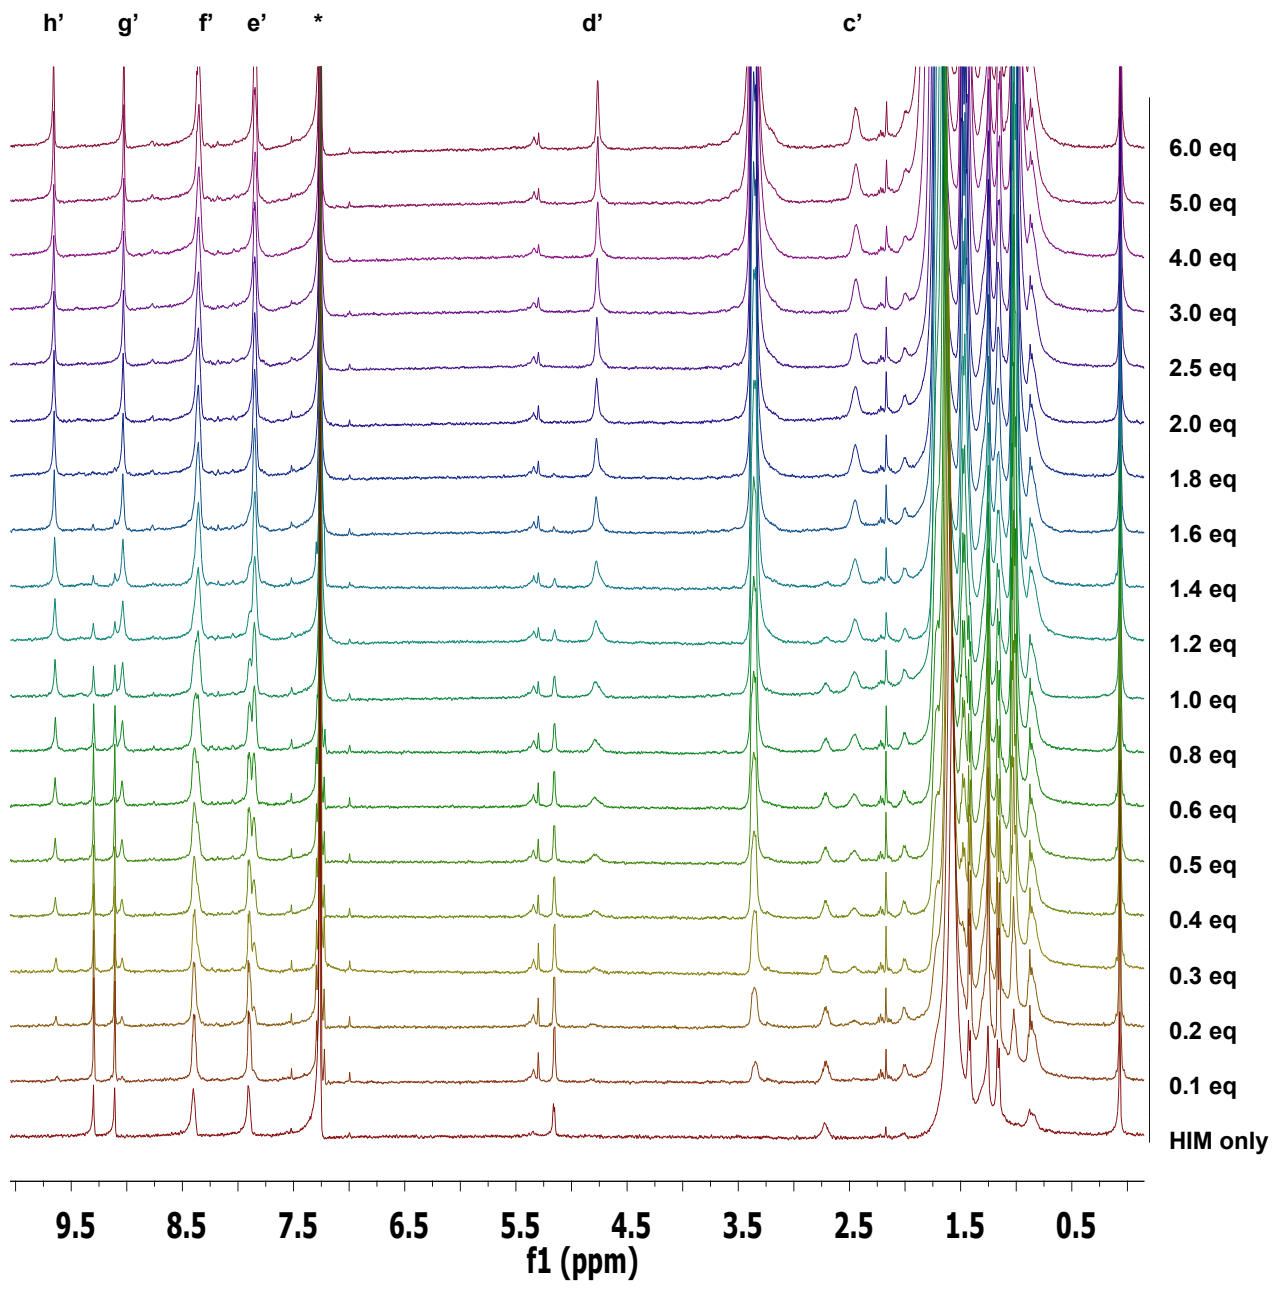



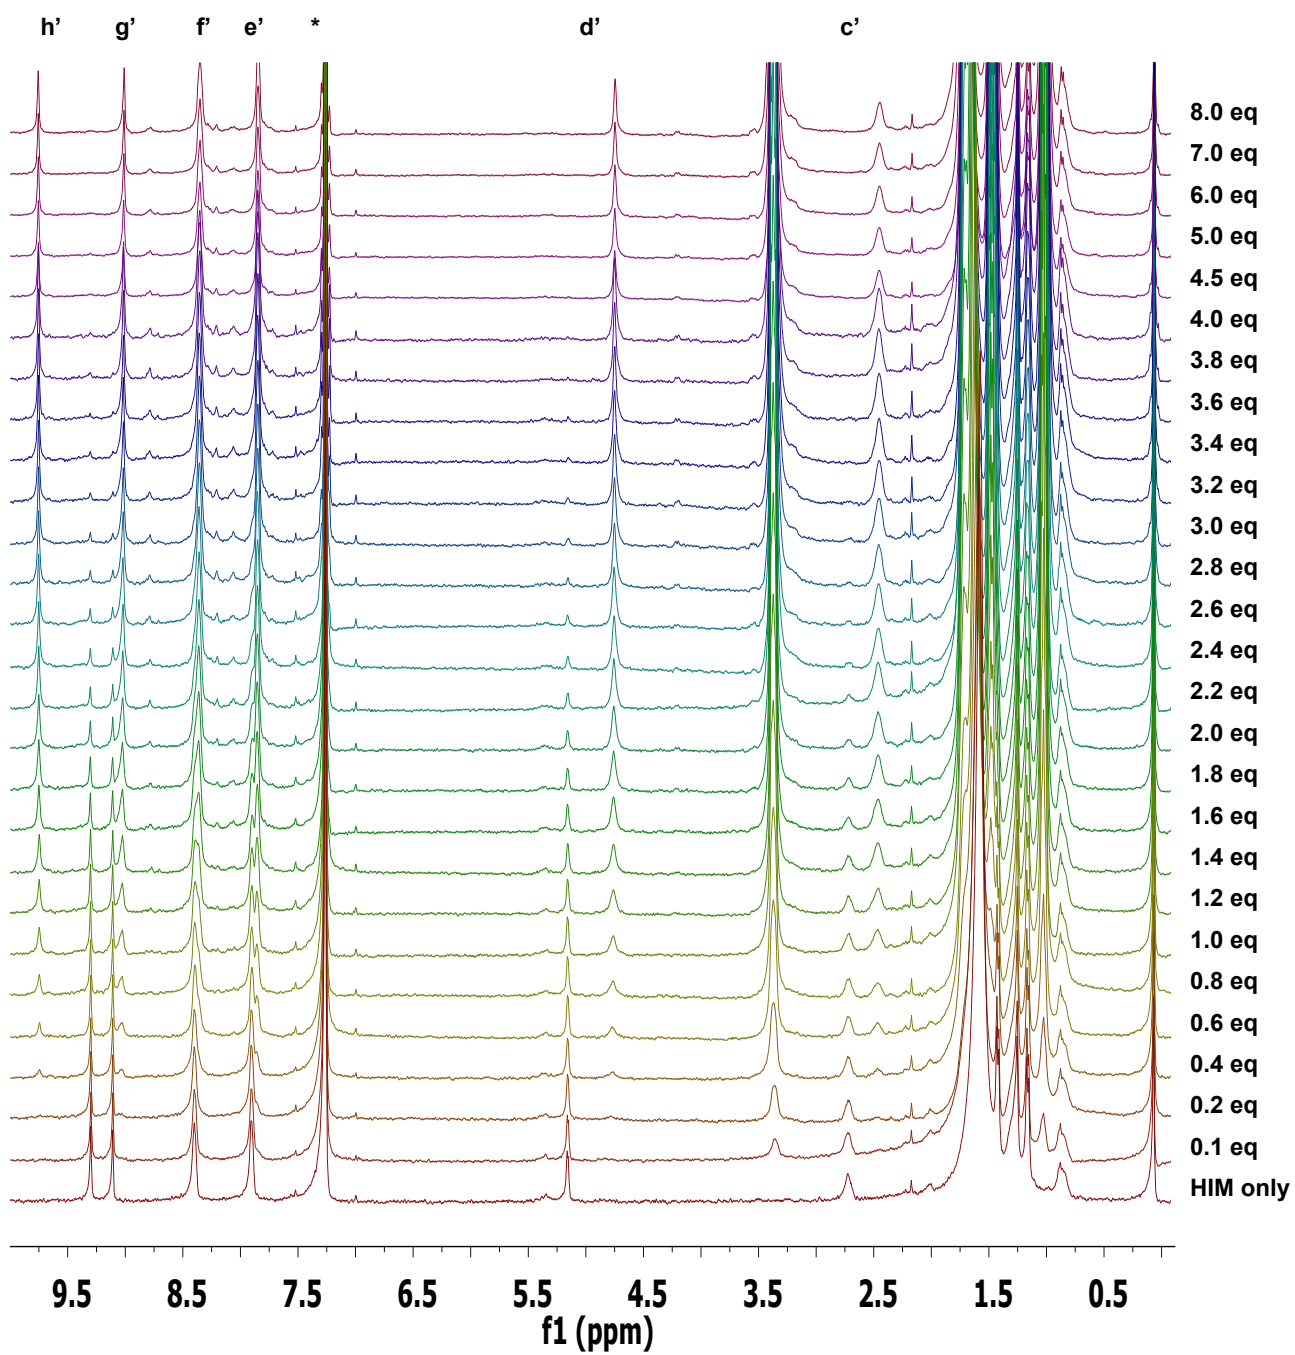

**Figure S19:**  $^1\text{H}$  NMR titration of **6c** with TBA(Br) at an incremental equivalency (0 to 8 equivalents TBA(Br) in  $\text{CDCl}_3$ . \* Residual  $\text{CHCl}_3$  peak from the NMR solvent.

## 5. Reversibility Experiment

### a. Reversibility Experiment with TBA(Cl)

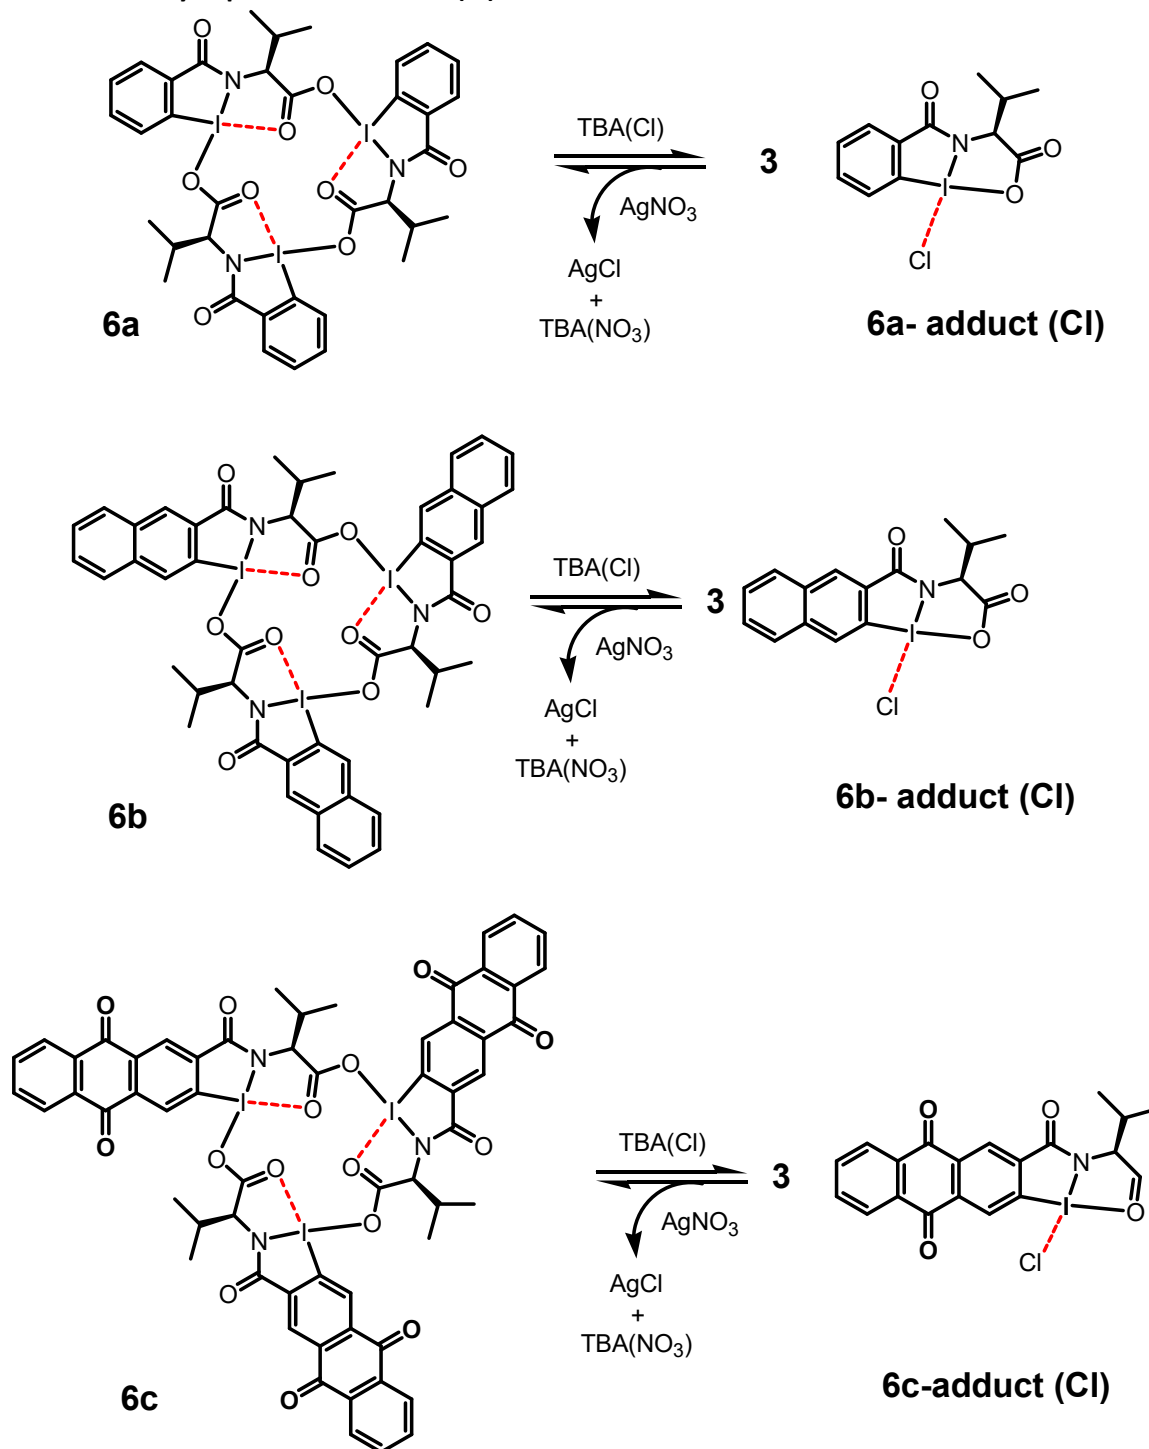

**Scheme SI1:** Scheme of HIM **6a-6c** disassembly by addition of chloride anion. The HIM can reform when AgNO<sub>3</sub> is added to coordinate the chloride anion.

**b. Reversibility Experiment with TBA(Br)**

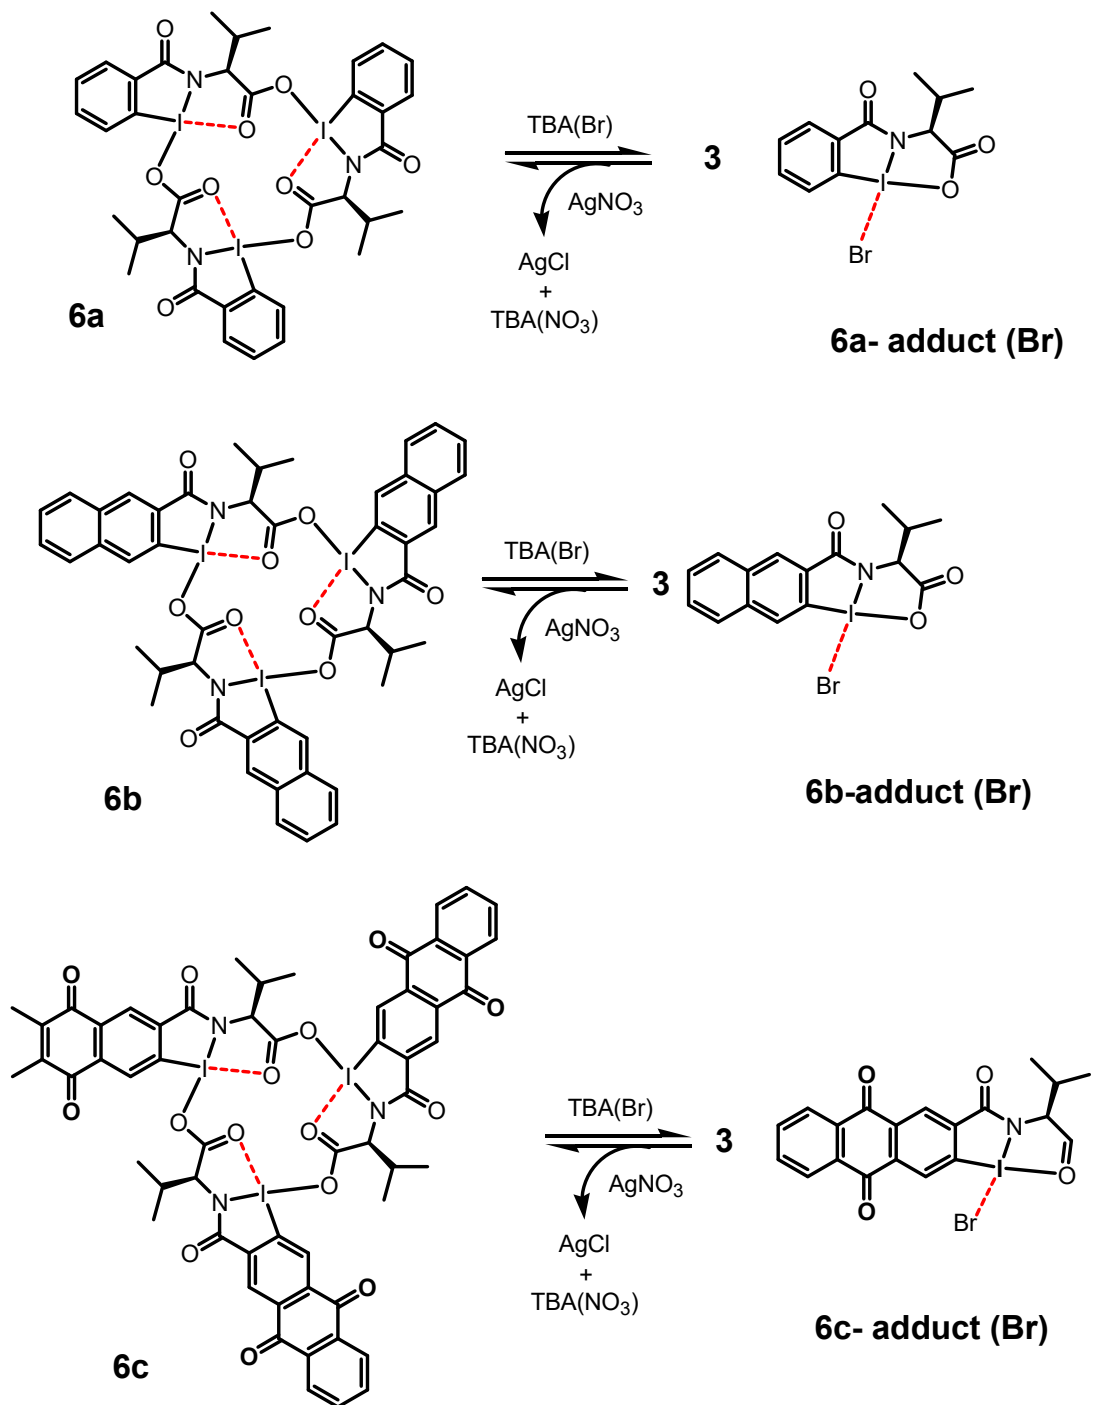

**Scheme S12:** Scheme of HIM **6a-6c** disassembly by addition of bromide anion. The HIM can reform when AgNO<sub>3</sub> is added to coordinate the chloride anion.

## **6.Binding Experiments**

The association between the HIM **6b-6c** and different anions was analyzed utilizing  $^1\text{H}$  NMR spectrometry in deuterated chloroform. From the  $^1\text{H}$  NMR study, the data was used to determine the binding constant between the HIM and anion in Bindfit (<http://app.supramolecular.org/bindfit/>). Three different HIMs (**6a-c**) were compared for their binding affinity with  $\text{Cl}^-$  and  $\text{Br}^-$ . Tetrabutylammonium salts were used for the experiment.

In case of HIM **6b**, an incremental equivalent addition of salt to the HIM was performed for this experiment. Stock solution (A) of HIM was prepared at a concentration of 4.3 mM (12.9 mM in monomer) which was kept constant throughout the process. A portion of HIM stock was used to prepare salt stock (B) at an equivalence of 20 to 40 times. 0.5 mL of stock A was taken to the NMR tube and the spectra  $^1\text{H}$  NMR spectrum was recorded.

**For chloride anion:** Stock solution B (with TBA(Cl)) was added stepwise in a 0.1 equivalence (versus the HIM) until a 1:2 equivalence of HIM to salt was added. After each stepwise addition of stock B to the NMR tube of stock A,  $^1\text{H}$  NMR was recorded. After 2 equivalence of stock B was added to the NMR tube the increment rate increased to 1 equivalence for each addition till the last addition.

**For bromide anion:** Stock solution B (with TBA(Br)) was added stepwise in a 0.1 equivalence (versus the HIM) increase until a 1:2.4 equivalence of HIM to salt was added. After each stepwise addition of stock B to the NMR tube of stock A,  $^1\text{H}$  NMR was recorded. The incremental rate increased to 0.2 equivalency from 2.4 to 3.0 equivalence and 0.5 equivalence from 3.0 to 4 equivalence. After 4 equivalence of stock B was added to the NMR tube the increment rate kept 1 equivalence for each addition till the last addition.

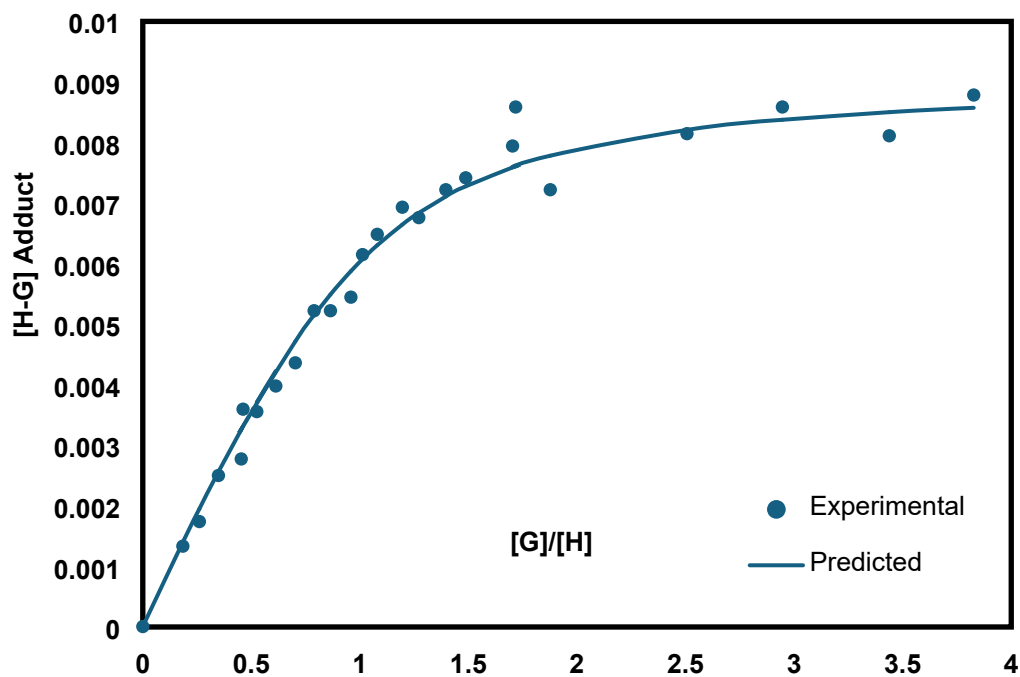

Figure SI10: Binding Isotherm of HIM 6b with TBA(Cl).

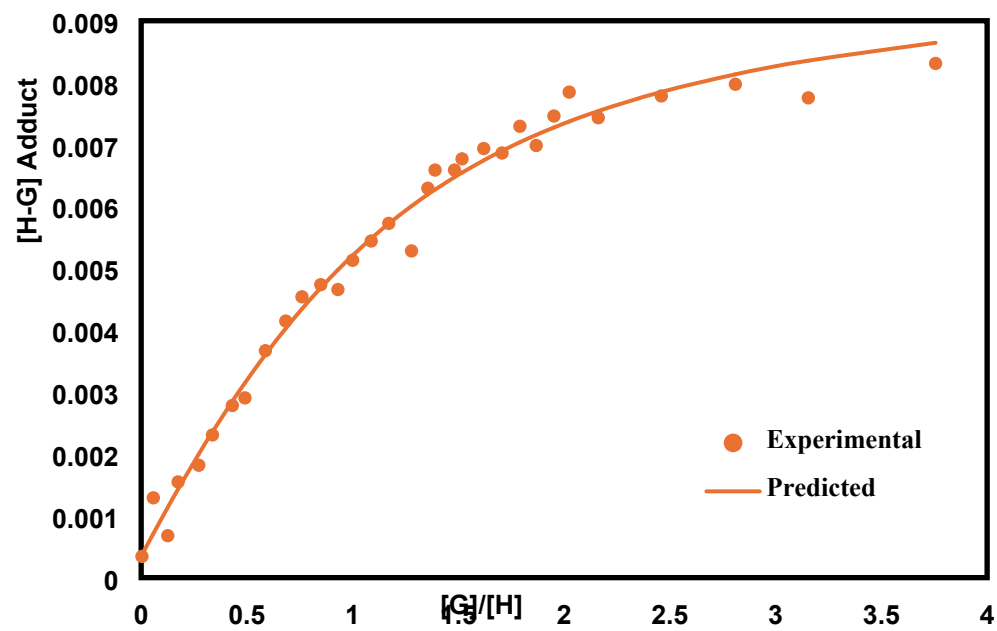

Figure SI11: Binding Isotherm of HIM 6b with TBA(Br).

In case of **6c**, an incremental equivalent addition of salt to the HIM was performed for this experiment. Stock solution (A) of HIM was prepared at a concentration of 4.3 mM (12.9 mM in monomer) which was kept constant throughout the process. A portion of HIM stock was used to prepare salt stock (B) at an equivalence of 20 to 40 times. 0.5 mL of stock A was taken to the NMR tube and the spectra  $^1\text{H}$  NMR spectrum was recorded.

**For chloride anion:** Then stock B (with TBA-Cl) was added stepwise in a 0.1 equivalence (verses the HIM) increase until a 0.6 equivalence of HIM to salt was added. After each stepwise addition of stock B to the NMR tube of stock A,  $^1\text{H}$  NMR was recorded. The incremental rate increased to 0.2 equivalency from 0.6 to 2.0 equivalence and added 0.5 equivalence from 2.0 to 3 equivalence. After 3 equivalence of stock B was added to the NMR tube the increment rate kept 1 equivalence for each addition till the last addition.

**For bromide anion:** Initially 0.1 equivalence of stock B (with TBA-Br) was added and then stock B (with TBA-Br) was added stepwise in a 0.2 equivalence (verses the HIM) increase until a 1:4 equivalence of HIM to salt was added. After each stepwise addition of stock B to the NMR tube of stock A,  $^1\text{H}$  NMR was recorded. The incremental rate increased to 0.5 equivalency from 4.0 to 5.0 equivalence. After 5.0 equivalence of stock B was added to the NMR tube the increment rate kept 1 equivalence for each addition till the last addition.

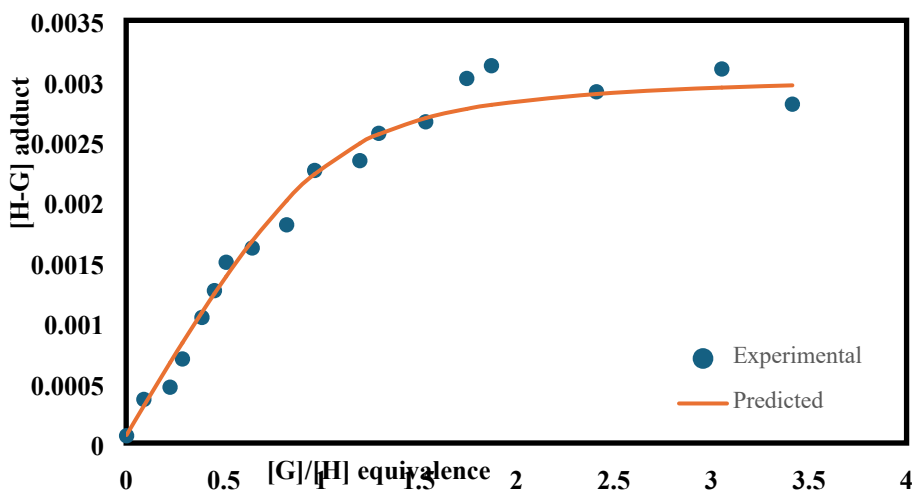

Figure SI12: Binding Isotherm of **6c** with TBA(Cl)

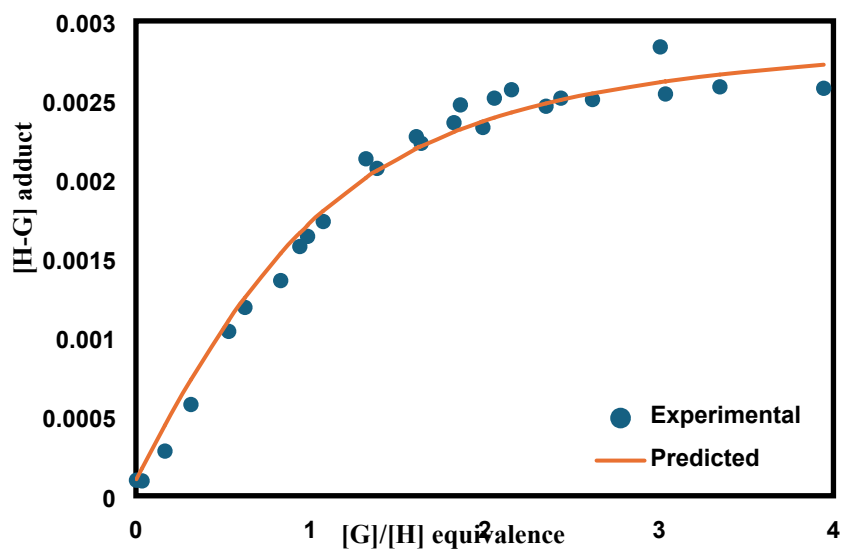

Figure SI13: Binding Isotherm of **6c** with TBA(Br)

## 7. Fluorescence Spectra

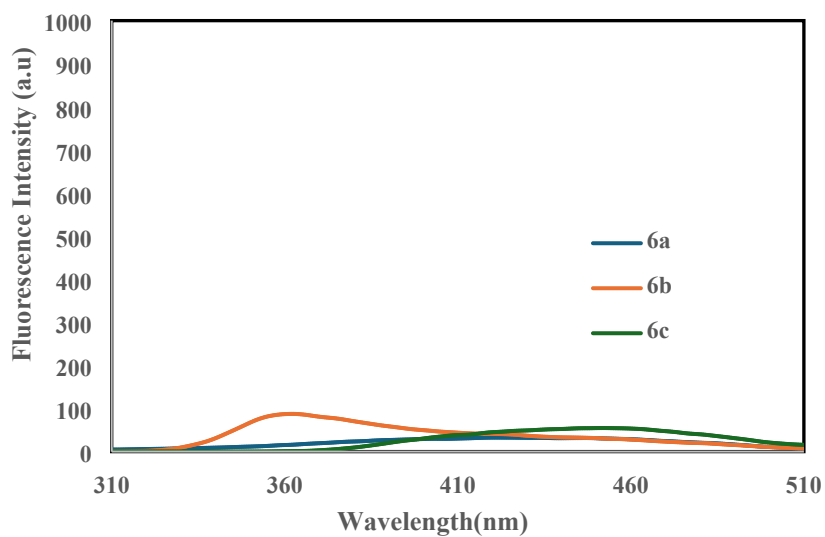

Figure SI14: Emission spectra of HIM **6a-6c** in chloroform. Excitation at 275 nm.

## 8. Experimental Section

Unless otherwise noted, all reagents were used as received and all reactions were carried out under an argon atmosphere. Column chromatography was performed on a CombiFlash® Rf system with Redisep normal phase silica columns (Teledyne ISCO Inc., Lincoln, NE). NMR were recorded on a Varian 400 MHz NMR station at room temperature, unless otherwise noted. High resolution mass spectra were obtained from the University of Illinois Mass Spectrometry Services.

Compound 3a, 4a, and 6a were previously prepared. (J. Org. Chem., 2024, 89, 7437-7445.)

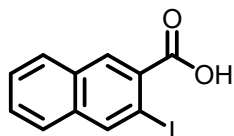

**3-Iodo-2-naphthoic acid.** To an ice-cold stirred suspension of commercially available 3-amino-2-naphthoic acid (1.0 g, 5.34 mmol) in 40 mL of a 1:1 mixture of 37% aqueous HCl (20 mL) and H<sub>2</sub>O (20 mL) was slowly added an aqueous solution of NaNO<sub>2</sub> (737 mg, 10.7 mmol, in 10 mL of distilled water). The resulting orange solution was stirred at 0 °C for 2 h, after which time an aqueous solution of KI (5.30 g, 32.0 mmol, in 10 mL of distilled water) was added dropwise. The mixture was stirred at 0 °C for 30 min, then at room temperature for 1 h, and finally heated at 60 °C for 1 h. EtOAc (20 mL) was then poured into the mixture and heating was maintained for an additional 30 min. Powdered Na<sub>2</sub>S<sub>2</sub>O<sub>3</sub> was added until complete de-colorization of the solution. The solid was removed by filtration. The reaction mixture was then extracted with EtOAc (4 x 25 mL). The organic layers were combined, washed with brine (100 mL), dried over MgSO<sub>4</sub>, filtered, and evaporated to dryness. The resulting brown oily residue was purified by column chromatography (Hexane/EtOAc, 1:1) to yield 1.2 g (75%) as a beige solid. <sup>1</sup>H NMR (400 MHz, DMSO) δ 8.63 (s, 1H), 8.36 (s, 1H), 8.04 (d, *J* = 7.6 Hz, 1H), 7.93 (d, *J* = 7.8 Hz, 1H), 7.67 – 7.58 (m, 2H). <sup>13</sup>C{<sup>1</sup>H} NMR (400 MHz, DMSO) δ 168.1, 139.7, 135.0, 133.1, 131.2, 130.2, 128.6, 127.4, 126.6, 89.6. HRMS (TOF MS ES+) *m/z*: [M + H]<sup>+</sup> Calcd for C<sub>11</sub>H<sub>8</sub>IO<sub>2</sub> 298.9569; found 298.9565.

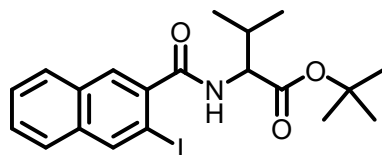

**2-[(3-Iodo-9,10-dioxo-9,10-dihydro-anthracene-2-carbonyl)-amino]-3-methyl-butanoic acid tert-butyl ester.**

To a solution of 3-Iodo-2-naphthoic acid (22.4 mg, 0.075 mmol) dissolved in DMF (5 ml) was added EDC.HCl (15.3 mg, 0.08 mmol) and HOBt (12.3 mg, 0.08 mmol) at 0°C. The reaction mixture was sonicated to make the solution homogeneous, and argon bubbled through the solution for 15 min. The L- valine tertiary-butyl ester hydrochloride (17.3 mg, 0.083 mmol) was added followed by diisopropylamine (24.8 mg, 0.024 mmol). The mixture was stirred overnight allowing the ice to melt to set the reaction at room temperature. After the completion of the reaction, the solution was poured into water (25 ml) and the precipitate was filtered, washed with water, and dried under vacuum to yield 20 mg (67%) of pure colorless powder. Melting point 88-90°C; <sup>1</sup>H NMR (400 MHz, CDCl<sub>3</sub>) δ 8.42 (s, 1H), 7.92 (s, 1H), 7.84 (dd, *J* = 6.4, 3.2 Hz, 1H), 7.74 (dd, *J* = 5.6, 3.6 Hz, 1H), 7.56 – 7.53 (m, 2H), 6.42 (d, *J* = 8.6 Hz, 1H), 4.72 (dd, *J* = 8.7, 4.4 Hz, 1H), 2.47 – 2.17 (m, 1H), 1.52



(s, 9H), 1.12 (d,  $J = 6.9$  Hz, 3H), 1.03 (d,  $J = 6.9$  Hz, 3H).  $^{13}\text{C}\{^1\text{H}\}$  NMR (400 MHz,  $\text{CDCl}_3$ )  $\delta$  170.9, 169.0, 139.7, 138.4, 135.1, 131.9, 128.3, 128.0, 127.7, 127.4, 126.8, 88.7, 82.4, 58.1, 31.8, 28.2, 19.3, 18.1. HRMS (TOF MS ES+)  $m/z$ :  $[\text{M} + \text{H}]^+$  Calcd for  $\text{C}_{20}\text{H}_{25}\text{INO}_3$  454.0879; found 454.0872.

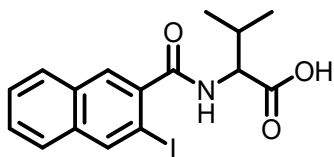

**2-[(3-iodo-naphthalen-2-yl)amino]-3-methyl-butanoic acid** To a 50 ml round bottom flask was added 2-[(3-iodo-naphthalen-2-yl)amino]-3-methyl-butanoic acid tert-butyl ester (924 mg, 2.04 mmol) and 30 mL dichloromethane. After the system was cooled at  $0^\circ\text{C}$ , TFA (5.11 g, 44.9 mmol) was added dropwise. The reaction was allowed to warm slowly to room temperature and kept stirring for 12 h. The solvent, by-product and extra TFA was removed *in vacuo* by co-evaporation with DCM and hexane multiple times to give 627 mg (77%) as a colorless solid. Melting point  $178\text{--}180^\circ\text{C}$ ;  $^1\text{H}$  NMR (400 MHz,  $\text{CDCl}_3$ )  $\delta$  8.40 (s, 1H), 7.91 (s, 1H), 7.85 – 7.81 (m, 1H), 7.75 – 7.71 (m, 1H), 7.58 – 7.51 (m, 2H), 6.44 (d,  $J = 8.9$  Hz, 1H), 4.87 (dd,  $J = 8.6, 4.6$  Hz, 1H), 2.56 – 2.19 (m, 1H), 1.16 (d,  $J = 6.9$  Hz, 3H), 1.06 (d,  $J = 6.9$  Hz, 3H).  $^{13}\text{C}\{^1\text{H}\}$  NMR (400 MHz,  $\text{CDCl}_3$ )  $\delta$  175.8, 169.7, 139.7, 137.9, 135.1, 131.8, 128.4, 128.2, 128.0, 127.5, 126.8, 88.3, 57.8, 31.4, 19.4, 18.0. HRMS (TOF MS ES+)  $m/z$ :  $[\text{M} + \text{H}]^+$  Calcd for  $\text{C}_{16}\text{H}_{17}\text{INO}_3$  398.0253; found 398.0247.

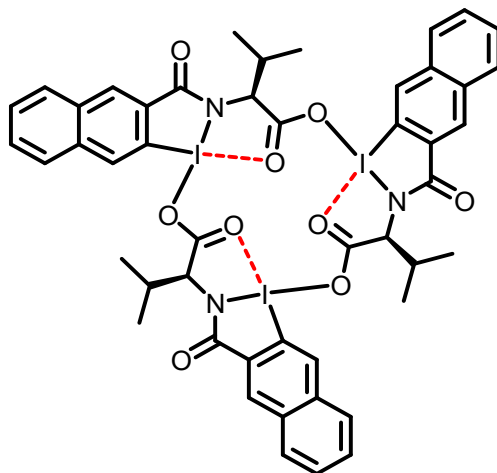

**Valine HIM in Naphthalene system** 2-[(3-iodo-naphthalen-2-yl)amino]-3-methyl-butanoic acid (100 mg, 0.25mmol) and 77% mCPBA (130 mg, 0.75 mmol) were dissolved in chloroform (6 ml) in a 10 mL round bottom flask. The reaction was kept stirring at room temperature for 8 h. The reaction mixture was concentrated by vacuum at room temperature. The residue was suspended in 10 mL diethyl ether, and then was filtrated and wash with diethyl ether ( $2 \times 10$  ml) to give 81 mg (82%) as a colorless solid. Melting point  $135\text{--}136^\circ\text{C}$ ;  $^1\text{H}$  NMR (400 MHz,  $\text{CDCl}_3$ )  $\delta$  8.77 (s, 1H), 8.75 (s, 1H), 8.09 (d,  $J = 8.0$  Hz, 1H), 8.01 (d,  $J = 8.0$  Hz, 1H), 7.76 – 7.66 (m, 2H), 5.09 (d,  $J = 5.1$  Hz, 1H), 2.68 – 2.60 (m, 1H), 1.32 (d,  $J = 6.9$  Hz, 3H), 1.19 (d,  $J = 6.9$  Hz, 3H).  $^{13}\text{C}\{^1\text{H}\}$  NMR (400 MHz,  $\text{CDCl}_3$ )  $\delta$  179.1, 167.3, 136.9, 133.3, 131.7, 130.5, 129.5, 129.4, 129.0, 128.5, 128.4, 113.9, 63.6, 33.2, 20.3, 18.0. HRMS (TOF MS ES+)  $m/z$ :  $[\text{M} + \text{H}]^+$  Calcd for  $\text{C}_{48}\text{H}_{43}\text{I}_3\text{N}_3\text{O}_9$  1186.0133; found 1186.0127.

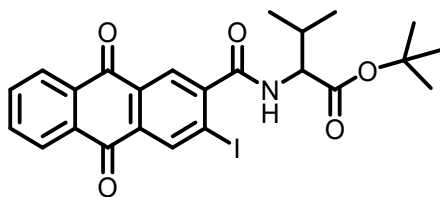

**2-[(3-iodo-9,10-dioxo-9,10-dihydro-anthracene-2-carbonyl)-amino]-3-methyl-butyl tert-butyl ester.**

To a solution of 3-iodo-anthraquinone-2-carboxylic acid (28.4 mg, 0.075 mmol) dissolved in DMF (5 ml) was added EDC.HCl (15.3 mg, 0.08 mmol) and HOBT (12.3 mg, 0.08 mmol) at 0°C. The reaction mixture was sonicated to make the solution homogeneous, and argon bubbled through the solution for 15 min. The L-valine tertiary-butyl ester hydrochloride (17.30 mg, 0.083 mmol) was added followed by diisopropylamine (24.8 mg, 0.024 mmol). The mixture was stirred overnight allowing the ice to melt to set the reaction at room temperature. After the completion of the reaction, the solution was poured into water (25 ml) and the precipitate was filtered, washed with enough water, and dried under vacuum to yield 22 mg (55%) of pure yellow powder. Melting point > 290°C; <sup>1</sup>H NMR (400 MHz, CDCl<sub>3</sub>) δ 8.41 (s, 1H), 7.91 (s, 1H), 7.82 (dd, *J* = 8.3, 4.1 Hz, 1H), 7.74 (dd, *J* = 8.5, 4.2 Hz, 1H), 7.57 – 7.50 (m, 2H), 6.44 (d, *J* = 8.6 Hz, 1H), 4.71 (dd, *J* = 8.7, 4.4 Hz, 1H), 2.42 – 2.29 (m, 1H), 1.52 (s, 9H), 1.12 (d, *J* = 6.9 Hz, 3H), 1.03 (d, *J* = 6.9 Hz, 3H). <sup>13</sup>C{<sup>1</sup>H} NMR (400 MHz, CDCl<sub>3</sub>) δ 182.1, 181.5, 170.5, 167.8, 147.4, 139.0, 134.8, 134.8, 133.8, 133.3, 133.0, 132.9, 127.6, 127.6, 126.5, 100.5, 82.8, 58.3, 31.9, 28.3, 19.2, 18.1. HRMS (TOF MS ES-) *m/z*: [M - H]<sup>+</sup> Calcd for C<sub>24</sub>H<sub>23</sub>INO<sub>5</sub> 532.0621; found 532.0613.

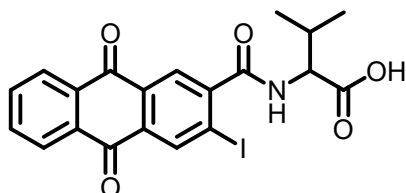

**2-[(3-iodo-9,10-dioxo-9,10-dihydro-anthracene-2-carbonyl)-amino]-3-methyl-butyl acid** To a 50 mL round bottom flask was added 2-[(3-iodo-9,10-dioxo-9,10-dihydro-anthracene-2-carbonyl)-amino]-3-methyl-butyl tert-butyl ester (26.7 mg, 0.05 mmol) and dry dichloromethane (5 ml). After the system was cooled at 0°C, TFA (125 mg, 1.1 mmol) was added dropwise. The reaction was warmed slowly to room temperature and stirred for 12 h. Excess TFA was removed by co-evaporation with DCM and hexane three times and the product was dried under high vacuum to obtain 22 mg (92%) of pure yellow solid. Melting point > 290°C; <sup>1</sup>H NMR (400 MHz, DMSO) δ 12.79 (s, 1H), 8.98 (d, *J* = 8.5 Hz, 1H), 8.58 (s, 1H), 8.27 – 8.21 (m, 2H), 8.00 – 7.95 (m, 2H), 7.93 (s, 1H), 4.37 (dd, *J* = 8.4, 5.9 Hz, 1H), 2.24 – 2.18 (m, 1H), 1.03 (d, *J* = 6.8 Hz, 3H), 0.98 (d, *J* = 6.8 Hz, 3H). <sup>13</sup>C{<sup>1</sup>H} NMR (400 MHz, DMSO<sub>3</sub>) δ 182.0, 181.1, 172.5, 168.1, 147.9, 137.2, 134.9, 133.2, 133.0, 132.8, 132.1, 126.9, 126.9, 125.6, 102.0, 57.8, 29.7, 19.4, 18.2. (Note: One carbon peak is merged at 134.9 ppm.) HRMS (TOF MS ES-) *m/z*: [M - H]<sup>+</sup> Calcd for C<sub>20</sub>H<sub>15</sub>INO<sub>5</sub> 475.9995; found 475.9991.

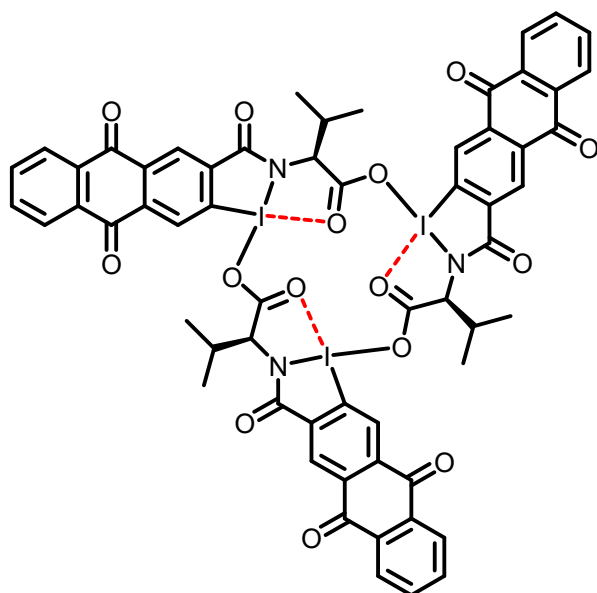

**Valine HIM in Anthraquinone system** 2-[(3-Iodo-9,10-dioxo-9,10-dihydro-anthracene-2-carbonyl)-amino]-3-methyl-butyrlic acid (120 mg, 0.25 mmol) and 77% mCPBA (130 mg, 0.75 mmol) were dissolved in chloroform (6 ml) in a 10 ml round bottom flask. The reaction was kept stirring at room temperature for 8 h. The reaction mixture was concentrated by vacuum at room temperature. The residue was suspended in 5 ml diethyl ether followed by sonication. The precipitate formed was filtered and wash with diethyl ether (2 × 5 ml) to give 75 mg (63%) of the product as a yellow solid.  $^1\text{H}$  NMR (400 MHz,  $\text{CDCl}_3$ )  $\delta$  9.29 (s, 1H), 9.10 (s, 1H), 8.41 – 8.37 (m, 2H), 7.91 – 7.88 (m, 2H), 5.15 (d,  $J$  = 4.3 Hz, 1H), 2.74 – 2.69 (m, 1H), 1.42 (d,  $J$  = 6.9 Hz, 3H), 1.15 (d,  $J$  = 6.9 Hz, 3H). Too insoluble for  $^{13}\text{C}$  NMR characterization. HRMS (TOF MS ES+)  $m/z$ :  $[\text{M} + \text{H}]^+$  Calcd for  $\text{C}_{60}\text{H}_{43}\text{I}_3\text{N}_3\text{O}_{15}$  1425.9828; found 1425.9819.

## 9. NMR Spectra

$^1\text{H}$  NMR- **3b** (400 MHz,  $\text{CDCl}_3$ )

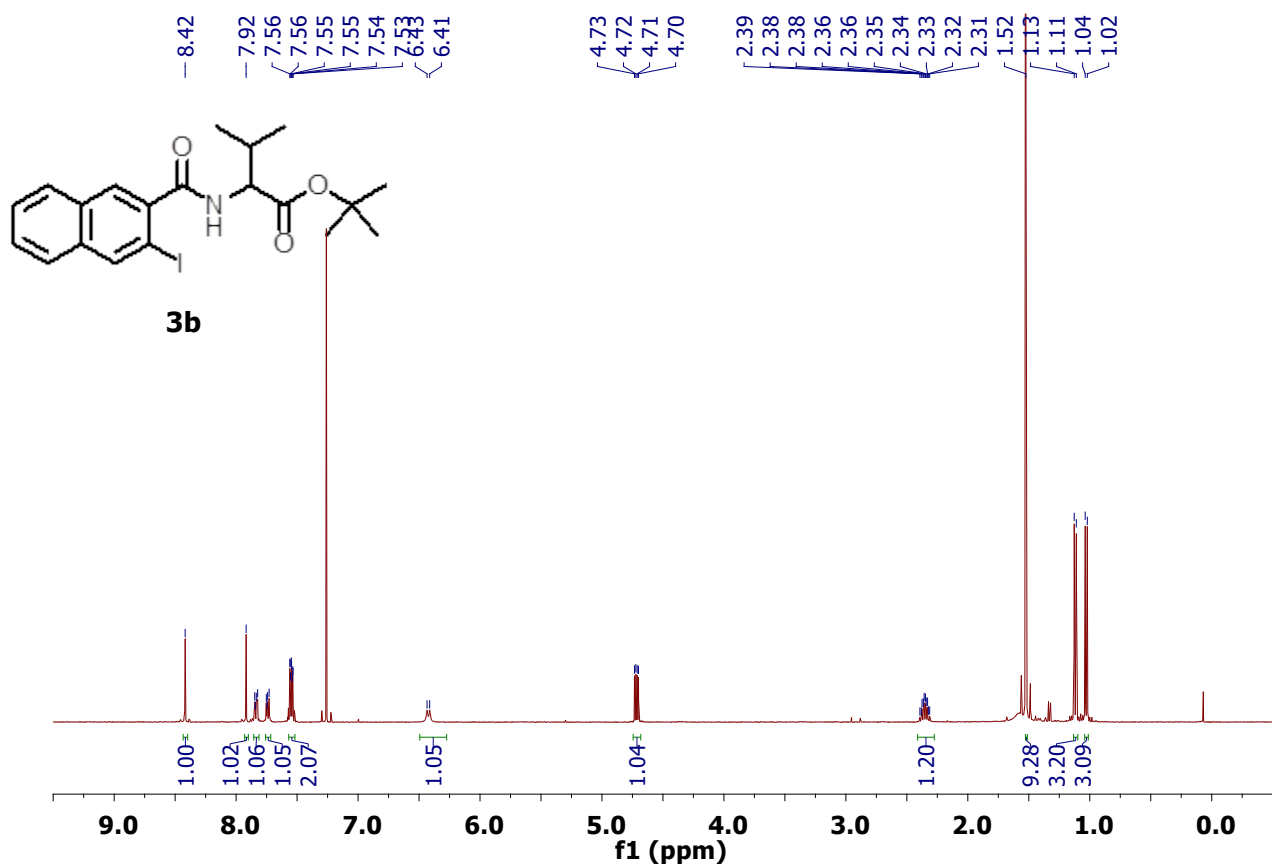

$^{13}\text{C}\{^1\text{H}\}$  NMR- **3b** (400 MHz,  $\text{CDCl}_3$ )

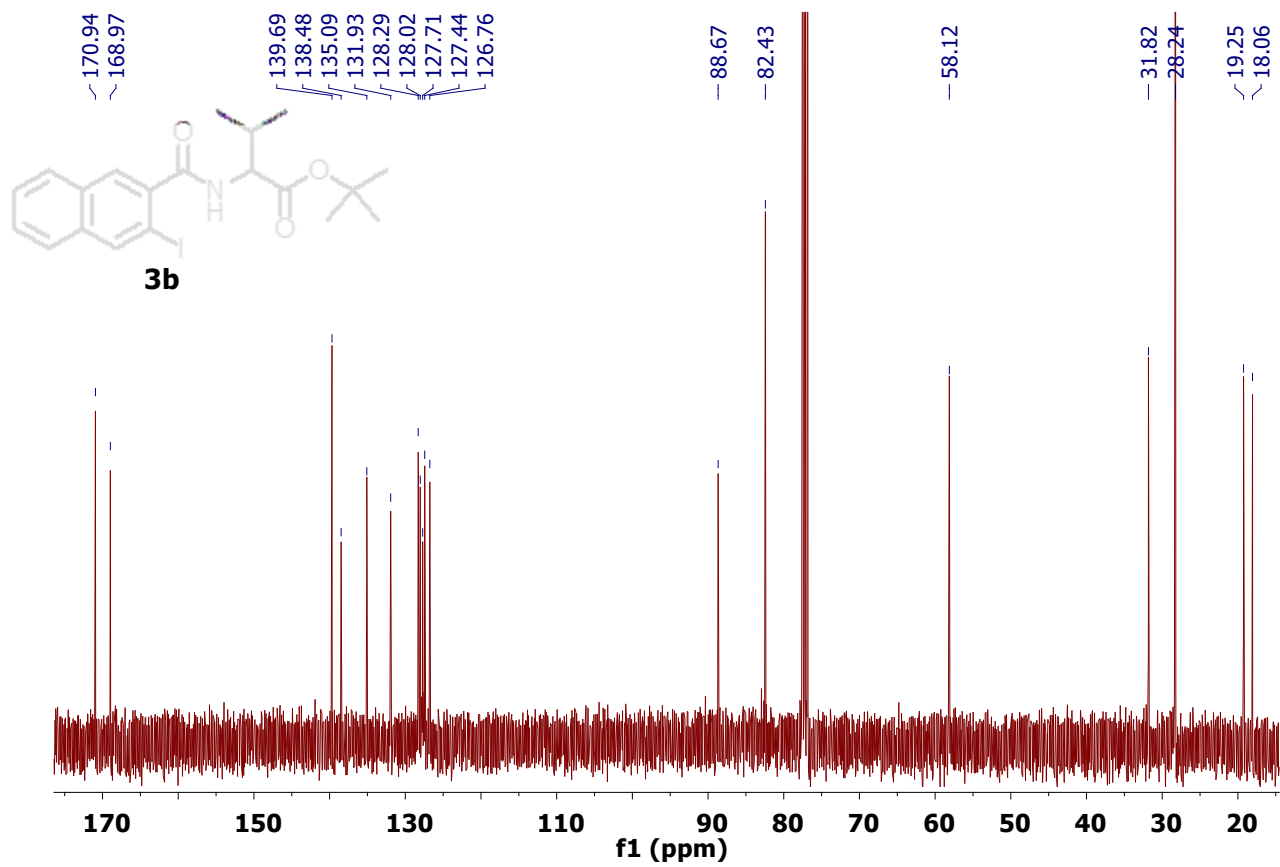

<sup>1</sup>H NMR- **4b** (400 MHz, CDCl<sub>3</sub>)

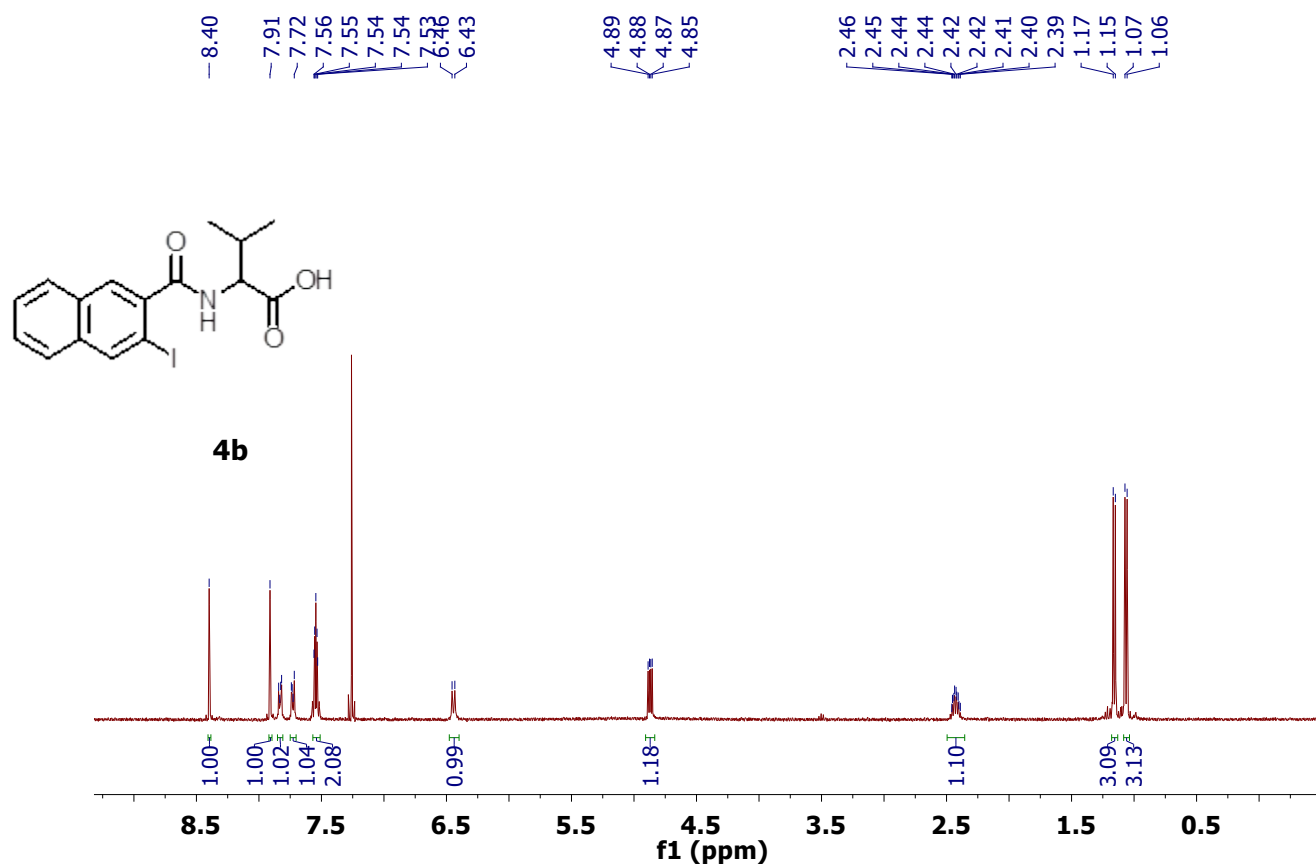

$^{13}\text{C}\{^1\text{H}\}$  NMR- **4b** (400 MHz,  $\text{CDCl}_3$ )

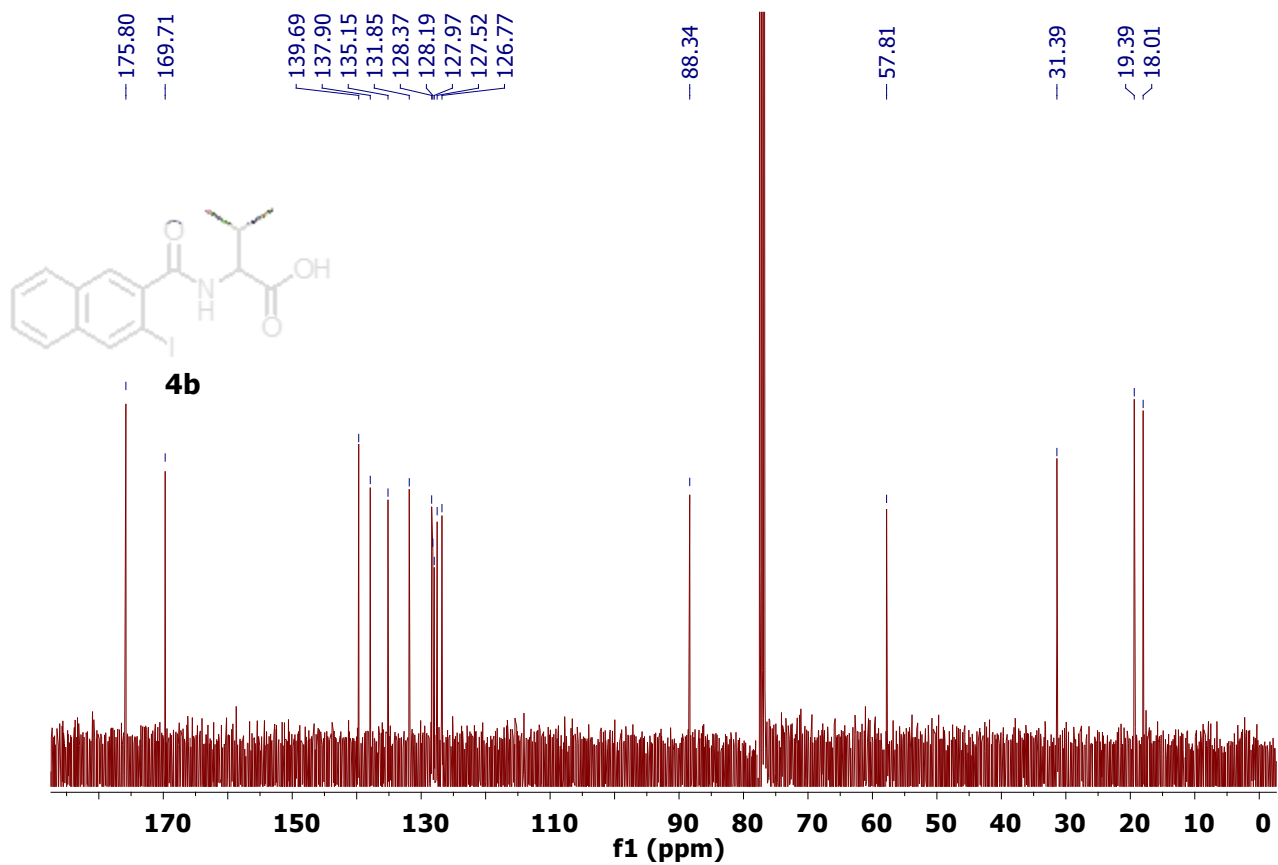

$^1\text{H}$  NMR- **6b** (400 MHz,  $\text{CDCl}_3$ )

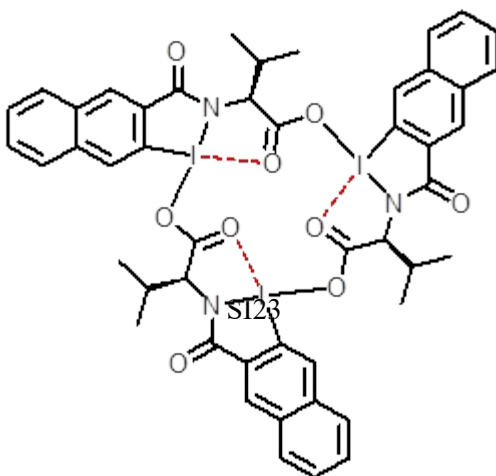

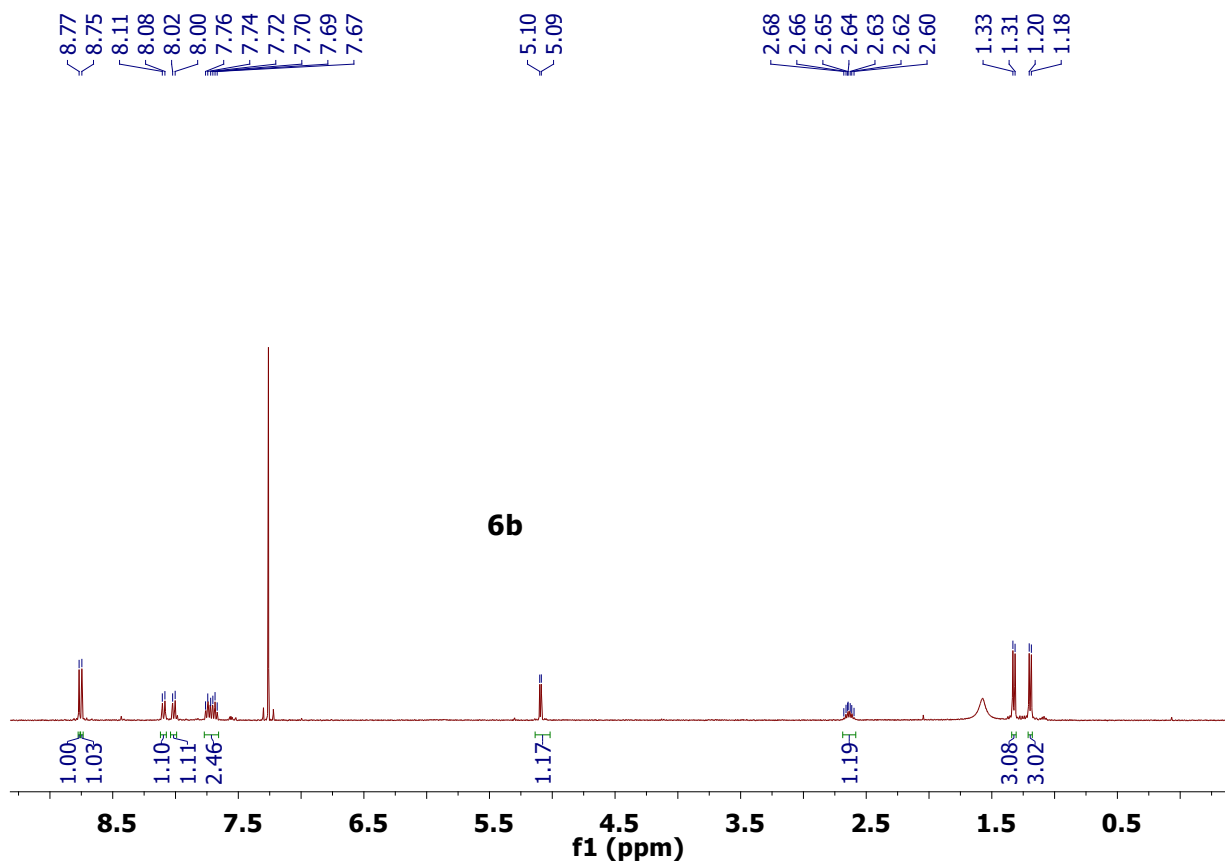

$^{13}\text{C}\{^1\text{H}\}$  NMR- **6b** (400 MHz,  $\text{CDCl}_3$ )



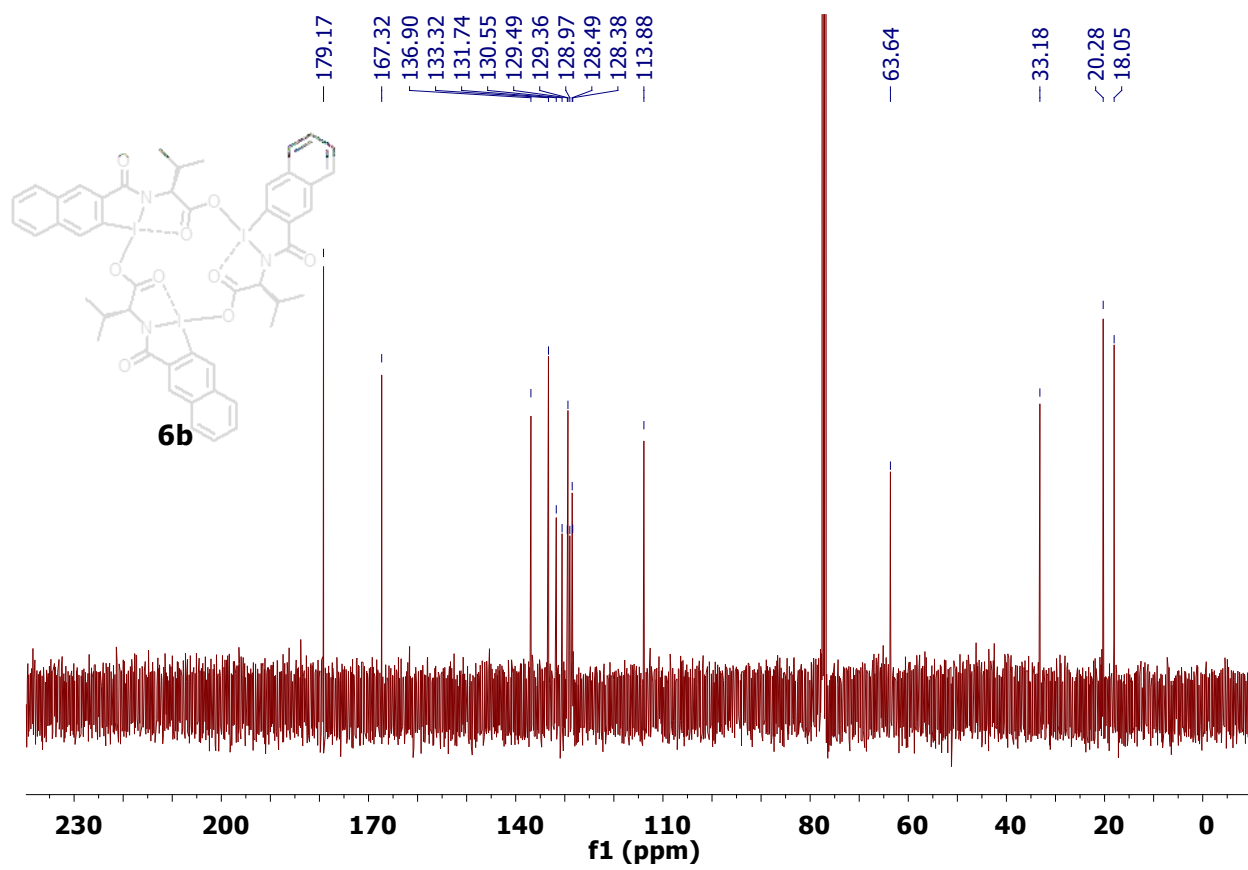

$^1\text{H}$  NMR- **3c** (400 MHz,  $\text{CDCl}_3$ )

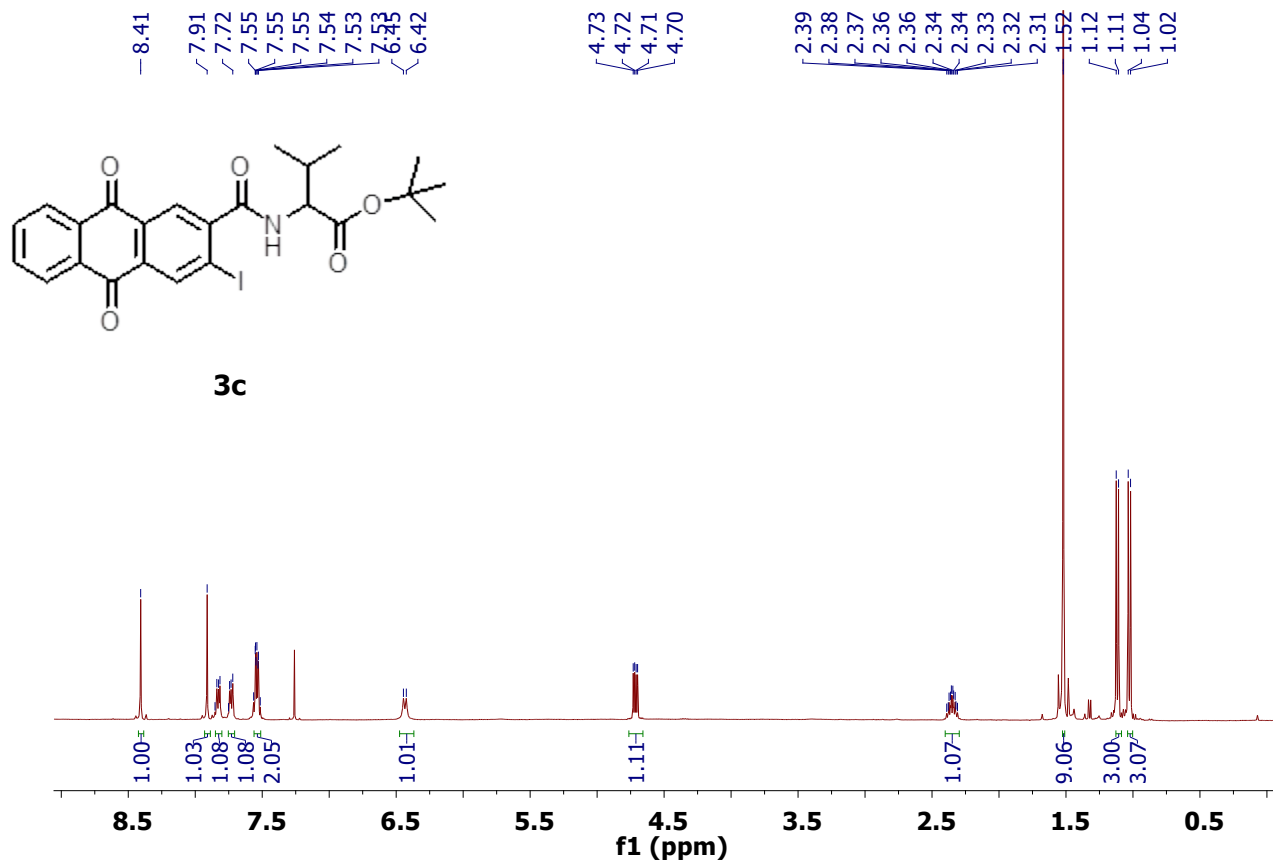

$^{13}\text{C}\{^1\text{H}\}$  NMR- **3c** (400 MHz,  $\text{CDCl}_3$ )

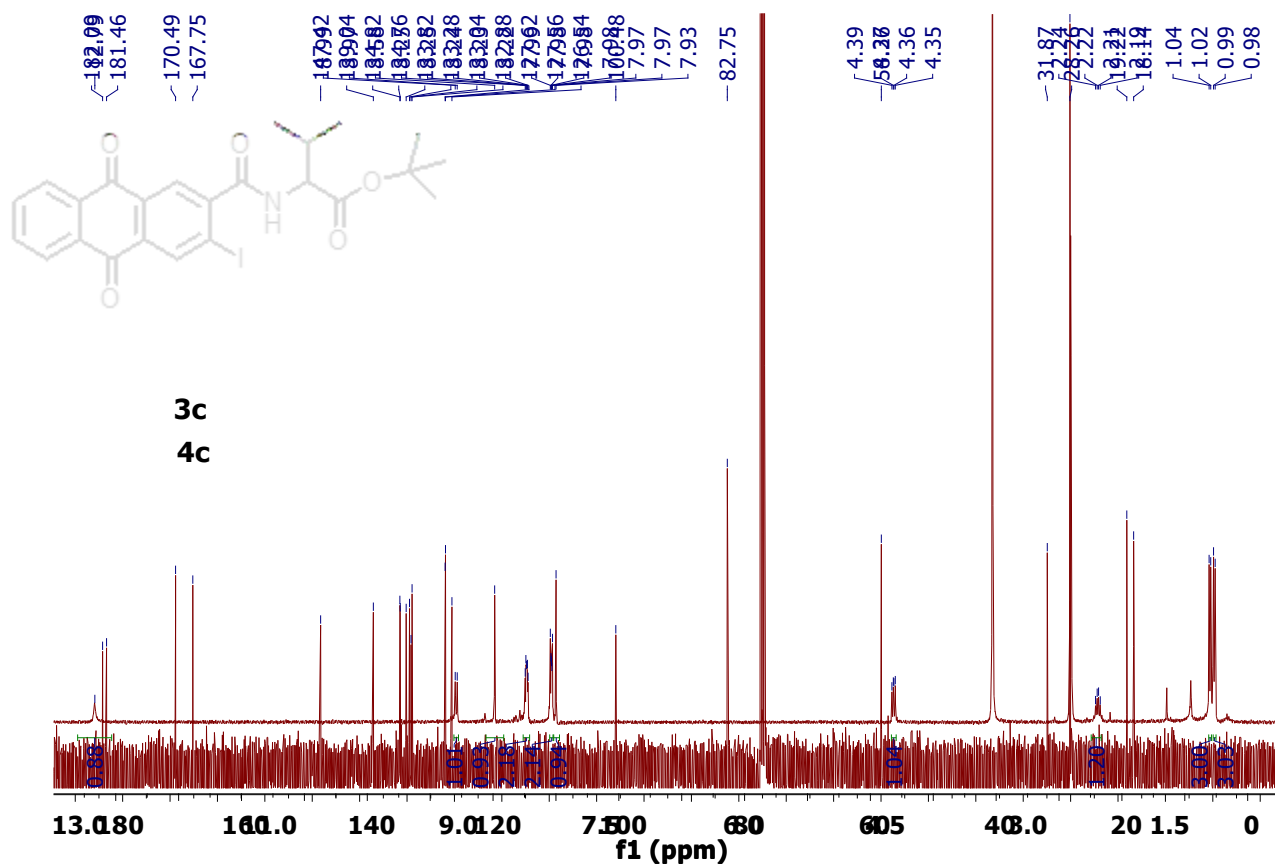

$^1\text{H}$  NMR- **4c** (400 MHz,  $\text{CDCl}_3$ )

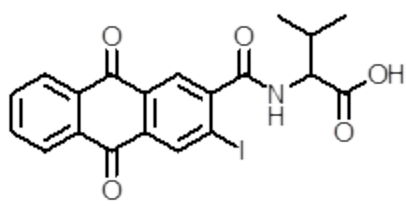

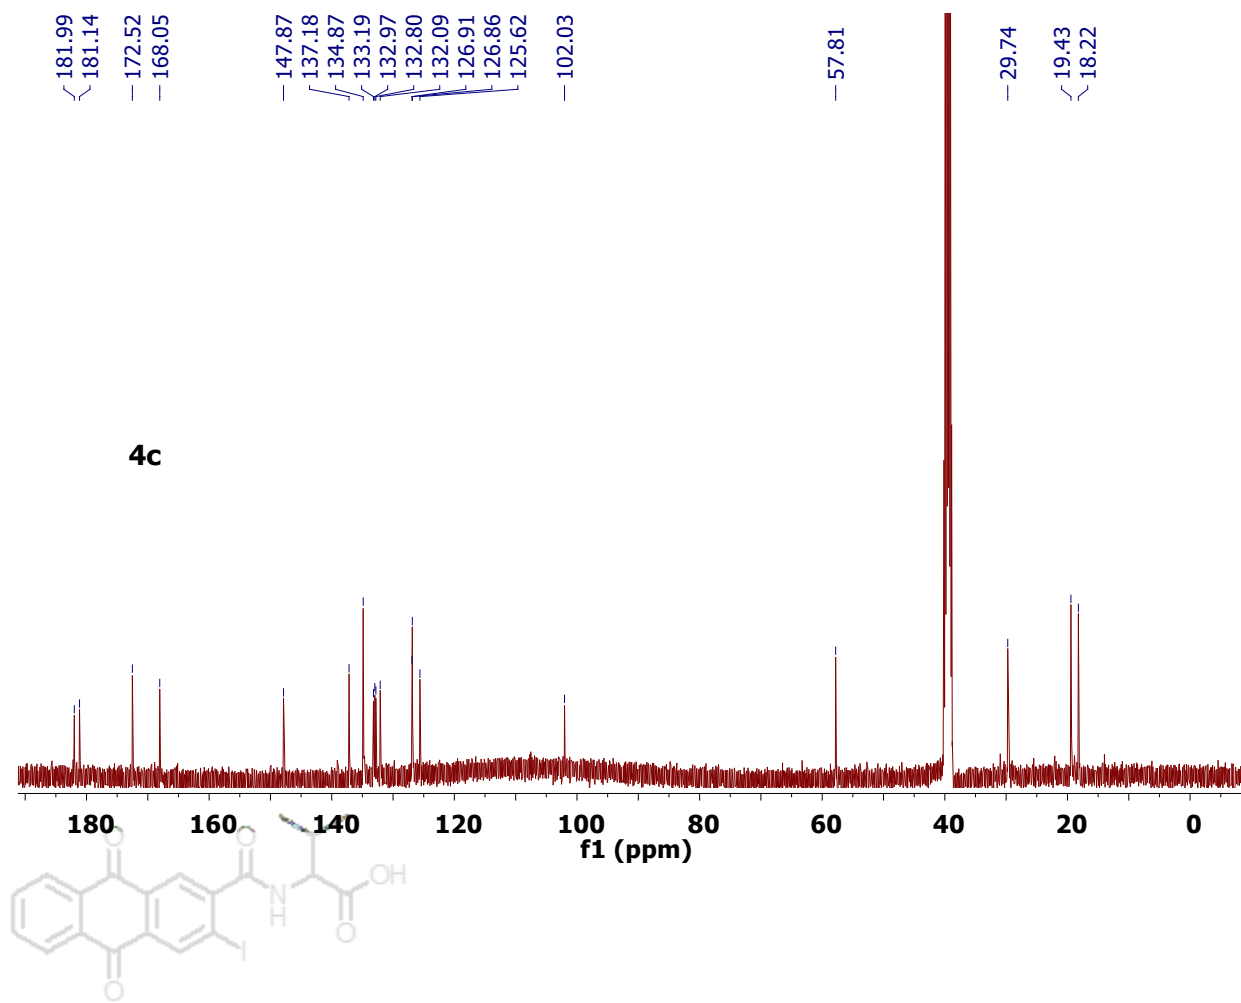

$^{13}\text{C}\{^1\text{H}\}$  NMR- **4c** (400 MHz,  $\text{CDCl}_3$ )

<sup>1</sup>H NMR- **6c** (400 MHz, CDCl<sub>3</sub>)

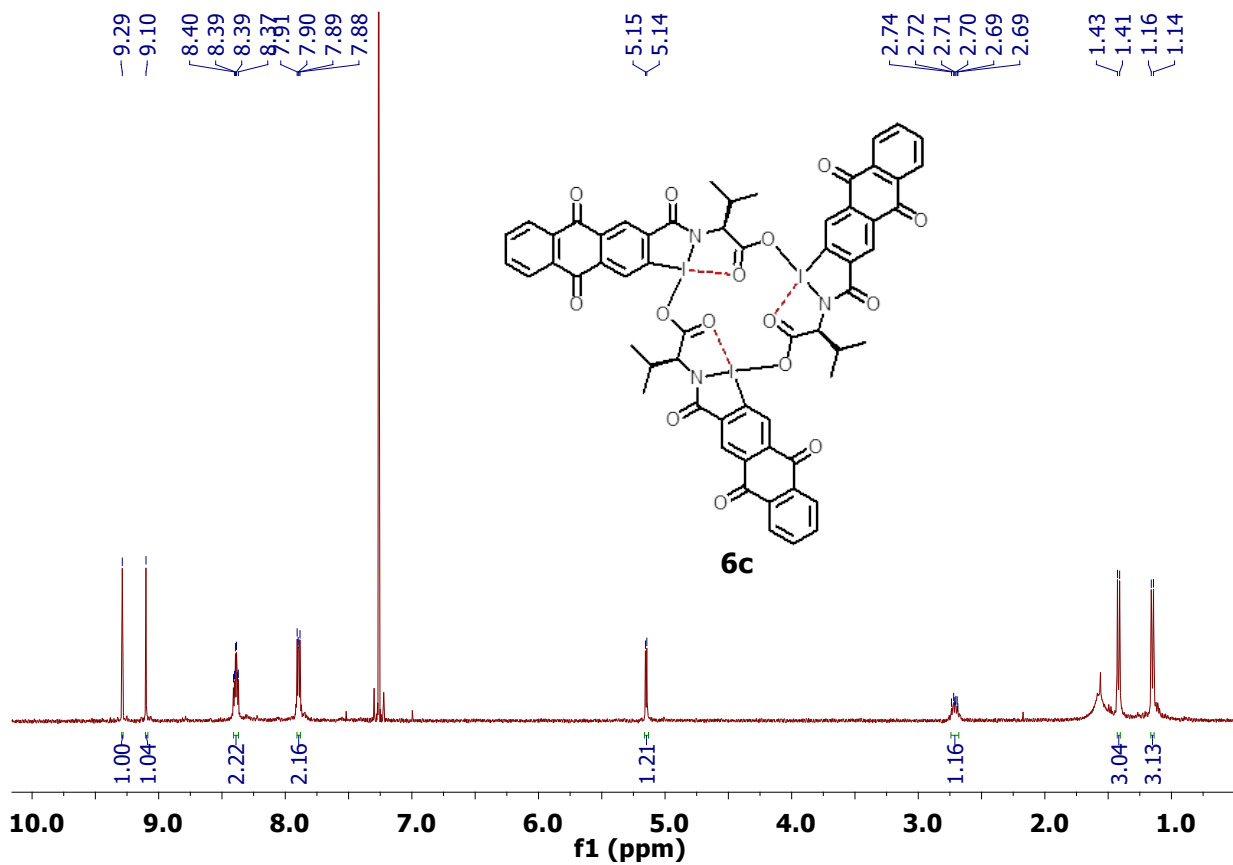

## **9. Crystallographic Information**

Intensity data were collected on a Bruker D8 Venture kappa diffractometer equipped with a Photon II CPAD detector. An  $\mu\text{s}$  microfocus Mo source ( $\lambda = 0.71073 \text{ \AA}$ ) coupled with a multi-layer mirror monochromator provided the incident beam. The sample was mounted on a 0.3 mm nylon loop with the minimal amount of Paratone-N oil. Data was collected at 100 K using a cold stream of  $\text{N}_2(\text{g})$  provided by an Oxford Cryostream 700 LT device. Preliminary unit cell constants were determined with a set of 24 narrow frame scans. Data was collected as a series of  $\phi$  and/or  $\omega$  scans with typical scan width of  $0.5^\circ$  and counting time of 10-30 seconds/frame at a crystal to detector distance of  $\sim 3.7$  cm. The collection, cell refinement, and integration of intensity data was carried out with the APEX3 software.<sup>1</sup> Final cell constants were determined by global refinement of reflections from the complete data set. A multi-scan absorption correction was performed with SADABS.<sup>2</sup> The structure was phased with intrinsic methods using SHELXT3 and refined with the full-matrix least-squares program SHELXL.<sup>4</sup>

(1) Bruker (2018). APEX3. Bruker AXS, Inc., Madison, Wisconsin, USA.

(2) Krause, L., Herbst-Irmer, R., Sheldrick, G. M. and Stalke, D. J. *Appl. Cryst.*, 2015, 48, 3-10.

(3) Sheldrick, G. M. *Acta Cryst.* 2015, A71, 3-8.

(4) Sheldrick, G. M. *Acta Cryst.* 2015, C71, 3-8. SI39

### Valine HIM in Naphthalene system

CCDC # 2388281

The structure was confirmed by obtaining a single crystal that was solved using X-ray diffraction. The single crystal of valine HIM in naphthalene system, **6b** suitable for X-ray crystallography was obtained using chloroform and diethyl ether by vapor diffusion method. The single crystal was run at 100K using a wavelength of 0.71073 Å. From the analysis of single crystal data set, analogous to the previously reported single crystal structure of valine HIM and Phenylalanine HIM, valine HIM in naphthalene system is also a distorted planar macrocyclic system consisting of the amino acids carbonyl oxygen facing inside the ring. All three isopropyl groups are located above the plane.

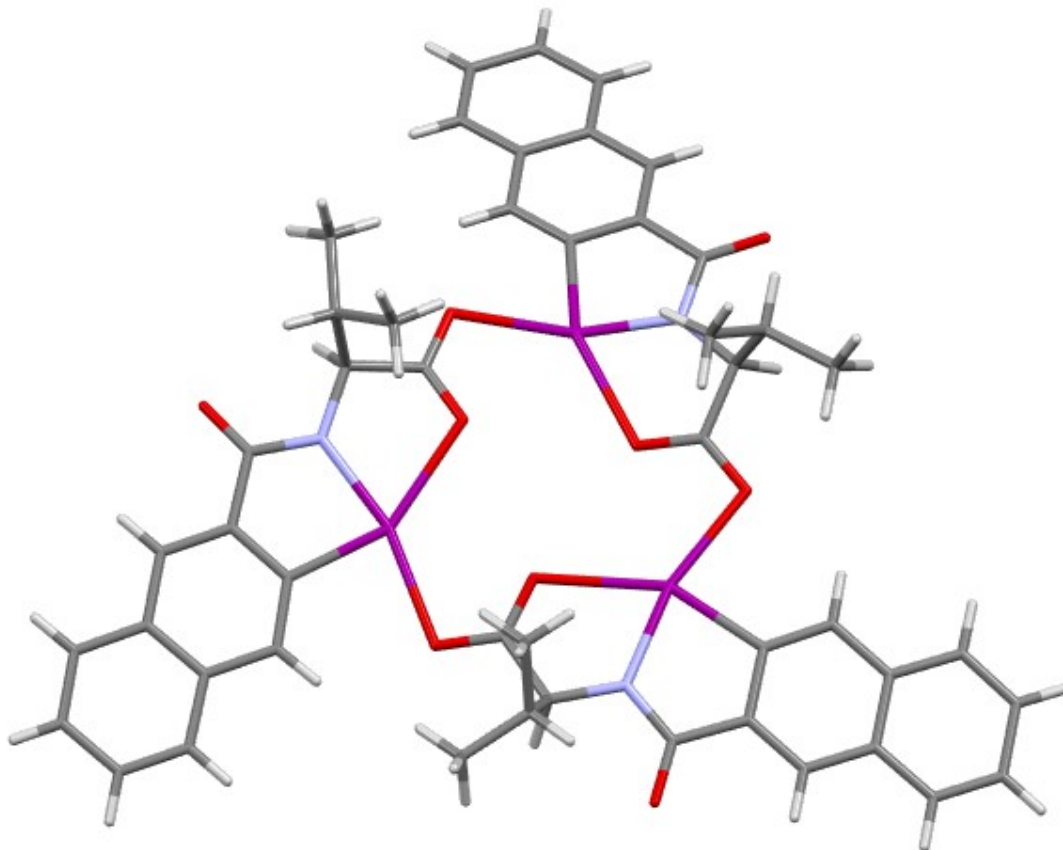

**Figure S115:** Perspective view of crystallographically independent molecules of Valine HIM in Naphthalene system. Solvent is removed for clarity. Nitrogen, oxygen and iodine atoms are denoted by light blue, red and purple color respectively. Hydrogens atoms are omitted. (Capped sticks style)

**Adduct (HIM monomer 7b)**

**CCDC # 2388282**

From the X-ray analysis, we observed one adduct per tetraethylammonium cation. The iodine atom is covalently bonded to chlorine atom with quite a long bond length of 2.73 Å. The perspective view of crystallographically independent molecules of adduct is shown in the figure below.

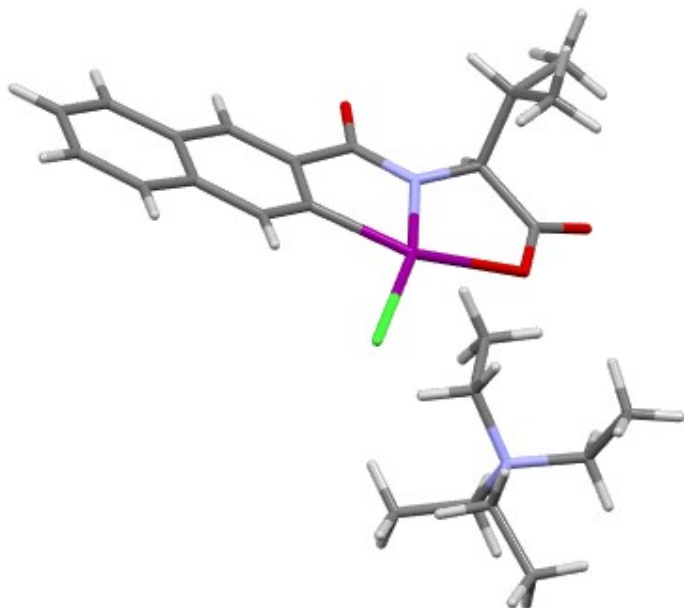

**Figure S116:** Perspective view of crystallographically independent molecules of HIM monomer **7b**. Solvents are removed for clarity. Nitrogen, oxygen, iodine and chlorine atoms are denoted by light blue, red, pink and green color respectively. Hydrogens atoms are omitted. (Capped sticks style)



### Valine HIM in Naphthalene system 6b/C60

CCDC # 2388283

The structure was confirmed by obtaining a single crystal that was solved using X-ray diffraction. The single crystal of Valine HIM in Naphthalene system **6b**/C<sub>60</sub> suitable for X-ray crystallography was obtained using chloroform/1,2-dichlorobenzene, and diethyl ether by vapor diffusion method. The single crystal was run at 100K using a wavelength of 0.71073 Å. From the analysis of single crystal data set, we observed that valine HIM in naphthalene system is also a distorted planar macrocyclic system consisting of the amino acids carbonyl oxygen facing inside the ring. All three isopropyl groups are located above the plane. Three fullerenes are co-crystallized with every two macrocycles.

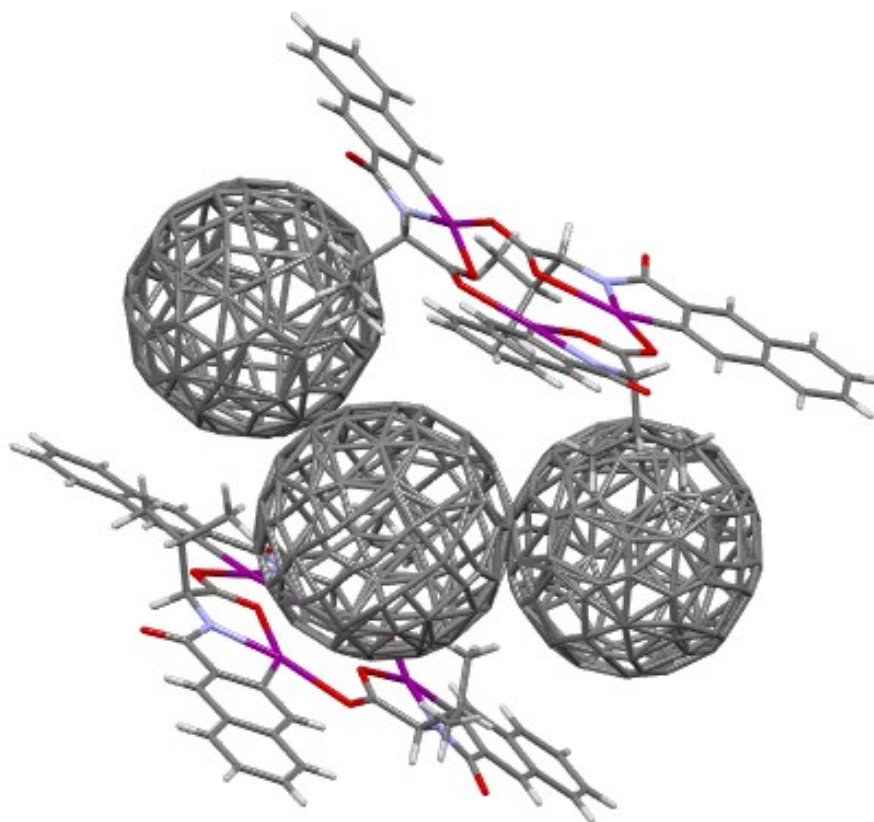

**Figure SI17:** Perspective view of crystallographically independent molecules of Valine HIM in Naphthalene system. Solvent is removed for clarity. Nitrogen, oxygen and iodine atoms are denoted by light blue, red and purple color respectively. Hydrogens atoms are omitted. (Capped sticks style)

**University of Illinois, Department of Chemistry**  
**George L. Clark X- R Facility and 3M Materials Laboratory**

Structure report for compound **Valine HIM in Naphthalene System**

|                         |                                                                                                          |
|-------------------------|----------------------------------------------------------------------------------------------------------|
| Identification code     | CCDC 2388281                                                                                             |
| Empirical formula       | C <sub>50.64</sub> H <sub>46.93</sub> Cl <sub>3.36</sub> I <sub>3</sub> N <sub>3</sub> O <sub>9.38</sub> |
| Principal Investigator: | Professor Dr. Kyle N Plunkett                                                                            |

**List of Tables**

Table 1. Crystallographic Experimental Details

Table 2. Atomic Coordinates and Equivalent Isotropic Displacement Parameters

Table 3. Selected Interatomic Distances and Selected Interatomic Angles

Table 4. Anisotropic Displacement Parameters

Table 5. Derived Atomic Coordinates and Displacement Parameters for Hydrogen Atoms

Table 6. Torsional Angles

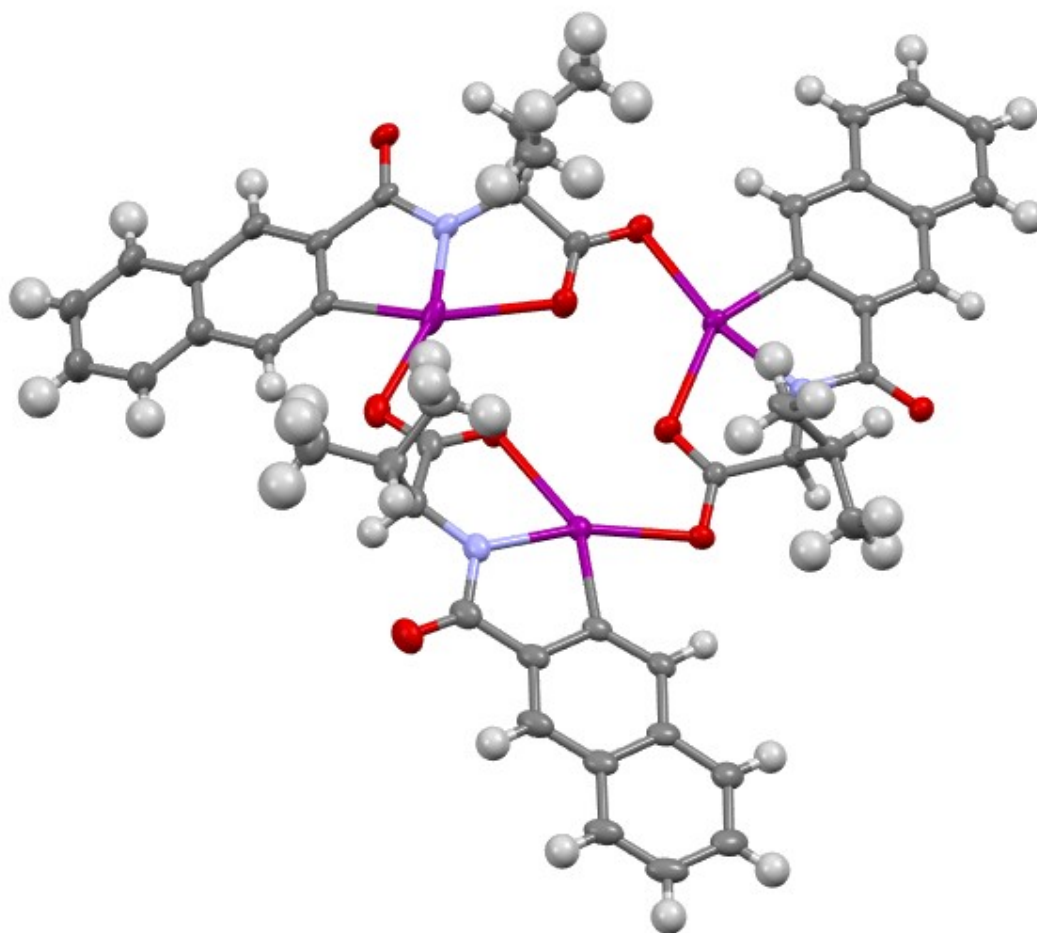

**Figure SI18:** Perspective view of crystallographically independent molecules of Valine HIM in Naphthalene system. Solvent is removed for clarity. Nitrogen, oxygen, and iodine atoms are denoted by light blue, red and purple color respectively. Hydrogens atoms are omitted. (Ellipsoid style)

Table 1. Crystal data and structure refinement for 4468ds.

|                                   |                                             |                  |
|-----------------------------------|---------------------------------------------|------------------|
| Identification code               | CCDC 2388281                                |                  |
| Empirical formula                 | C50.64 H46.93 Cl3.36 I3 N3 O9.38            |                  |
| Formula weight                    | 1347.33                                     |                  |
| Temperature                       | 100(2) K                                    |                  |
| Wavelength                        | 0.71073 Å                                   |                  |
| Crystal system                    | Monoclinic                                  |                  |
| Space group                       | P2 <sub>1</sub>                             |                  |
| Unit cell dimensions              | a = 14.7131(3) Å                            | a = 90°.         |
|                                   | b = 22.8611(4) Å                            | b = 96.0622(4)°. |
|                                   | c = 15.1145(3) Å                            | g = 90°.         |
| Volume                            | 5055.45(17) Å <sup>3</sup>                  |                  |
| Z                                 | 4                                           |                  |
| Density (calculated)              | 1.770 Mg/m <sup>3</sup>                     |                  |
| Absorption coefficient            | 2.092 mm <sup>-1</sup>                      |                  |
| F(000)                            | 2652                                        |                  |
| Crystal size                      | 0.259 x 0.184 x 0.100 mm <sup>3</sup>       |                  |
| Theta range for data collection   | 2.228 to 28.339°.                           |                  |
| Index ranges                      | -19<=h<=19, -30<=k<=30, -19<=l<=20          |                  |
| Reflections collected             | 181866                                      |                  |
| Independent reflections           | 25204 [R(int) = 0.0356]                     |                  |
| Completeness to theta = 25.242°   | 99.9 %                                      |                  |
| Absorption correction             | Semi-empirical from equivalents             |                  |
| Max. and min. transmission        | 0.7457 and 0.6633                           |                  |
| Refinement method                 | Full-matrix least-squares on F <sup>2</sup> |                  |
| Data / restraints / parameters    | 25204 / 1013 / 1553                         |                  |
| Goodness-of-fit on F <sup>2</sup> | 1.066                                       |                  |
| Final R indices [I>2sigma(I)]     | R1 = 0.0233, wR2 = 0.0588                   |                  |
| R indices (all data)              | R1 = 0.0244, wR2 = 0.0597                   |                  |
| Absolute structure parameter      | -0.027(3)                                   |                  |
| Extinction coefficient            | n/a                                         |                  |
| Largest diff. peak and hole       | 1.132 and -1.524 e.Å <sup>-3</sup>          |                  |

Table 2. Atomic coordinates ( $\times 10^4$ ) and equivalent isotropic displacement parameters ( $\text{\AA}^2 \times 10^3$ ) for 4468ds.  $U(\text{eq})$  is defined as one third of the trace of the orthogonalized  $U^{ij}$  tensor.

|       | x        | y       | z        | U(eq) |
|-------|----------|---------|----------|-------|
| I(1)  | 6685(1)  | 3596(1) | 942(1)   | 21(1) |
| I(2)  | 8151(1)  | 5401(1) | 2749(1)  | 20(1) |
| I(3)  | 5965(1)  | 5766(1) | -191(1)  | 20(1) |
| I(4)  | 8751(1)  | 4462(1) | 9886(1)  | 23(1) |
| I(5)  | 7797(1)  | 6508(1) | 8411(1)  | 23(1) |
| I(6)  | 6520(1)  | 4560(1) | 6931(1)  | 33(1) |
| O(1)  | 5726(2)  | 2752(2) | -1398(2) | 28(1) |
| O(2)  | 5481(2)  | 4934(2) | -1014(2) | 25(1) |
| O(3)  | 6171(3)  | 4560(2) | 236(2)   | 30(1) |
| O(4)  | 9928(3)  | 4414(2) | 4485(3)  | 39(1) |
| O(5)  | 7569(2)  | 3489(2) | 2337(2)  | 28(1) |
| O(6)  | 7442(3)  | 4447(2) | 2140(3)  | 37(1) |
| O(7)  | 6086(3)  | 7588(2) | -200(2)  | 30(1) |
| O(8)  | 7846(2)  | 6339(2) | 2173(2)  | 25(1) |
| O(9)  | 6976(3)  | 5758(2) | 1270(3)  | 36(1) |
| O(10) | 10246(2) | 5098(2) | 12182(2) | 27(1) |
| O(11) | 8550(2)  | 6420(2) | 9864(2)  | 26(1) |
| O(12) | 8410(3)  | 5500(2) | 9391(2)  | 30(1) |
| O(13) | 6564(3)  | 7659(2) | 6529(3)  | 42(1) |
| O(14) | 6128(2)  | 5486(2) | 6329(2)  | 32(1) |
| O(15) | 7168(3)  | 5667(2) | 7459(3)  | 32(1) |
| N(1)  | 5959(3)  | 3440(2) | -305(3)  | 23(1) |
| N(2)  | 8716(3)  | 4689(2) | 3501(3)  | 25(1) |
| N(3)  | 6229(3)  | 6630(2) | 244(3)   | 22(1) |
| N(4)  | 9432(3)  | 5045(2) | 10812(3) | 22(1) |
| N(5)  | 7155(3)  | 6829(2) | 7202(3)  | 28(1) |
| C(1)  | 6805(3)  | 2679(2) | 871(3)   | 22(1) |
| C(2)  | 7196(3)  | 2326(2) | 1531(3)  | 24(1) |
| C(3)  | 7195(3)  | 1708(2) | 1371(3)  | 25(1) |
| C(4)  | 7585(3)  | 1311(2) | 2027(3)  | 28(1) |
| C(5)  | 7553(4)  | 723(2)  | 1881(4)  | 32(1) |

|        |          |          |          |       |
|--------|----------|----------|----------|-------|
| C(6)   | 7136(3)  | 495(2)   | 1077(4)  | 28(1) |
| C(7)   | 6772(3)  | 861(2)   | 415(3)   | 26(1) |
| C(8)   | 6798(3)  | 1483(2)  | 537(3)   | 24(1) |
| C(9)   | 6415(3)  | 1872(2)  | -124(3)  | 24(1) |
| C(10)  | 6422(3)  | 2467(2)  | 43(3)    | 22(1) |
| C(11)  | 6011(3)  | 2891(2)  | -629(3)  | 23(1) |
| C(12)  | 5499(3)  | 3895(2)  | -879(3)  | 21(1) |
| C(13)  | 5749(3)  | 4500(2)  | -517(3)  | 22(1) |
| C(14)  | 4443(3)  | 3798(2)  | -972(3)  | 24(1) |
| C(15)  | 4026(3)  | 3987(2)  | -142(4)  | 31(1) |
| C(16)  | 3990(3)  | 4082(2)  | -1818(3) | 30(1) |
| C(17)  | 9159(3)  | 5828(2)  | 3604(3)  | 23(1) |
| C(18)  | 9280(3)  | 6421(2)  | 3659(3)  | 25(1) |
| C(19)  | 9989(4)  | 6638(2)  | 4290(3)  | 28(1) |
| C(20)  | 10118(4) | 7248(2)  | 4415(4)  | 36(1) |
| C(21)  | 10800(5) | 7451(3)  | 5028(4)  | 46(2) |
| C(22)  | 11367(5) | 7060(3)  | 5540(4)  | 48(2) |
| C(23)  | 11261(4) | 6473(3)  | 5440(4)  | 40(1) |
| C(24)  | 10556(4) | 6242(2)  | 4812(3)  | 32(1) |
| C(25)  | 10409(3) | 5637(2)  | 4712(3)  | 29(1) |
| C(26)  | 9718(3)  | 5427(2)  | 4117(3)  | 27(1) |
| C(27)  | 9489(3)  | 4792(2)  | 4055(3)  | 28(1) |
| C(28)  | 8271(3)  | 4118(2)  | 3488(3)  | 25(1) |
| C(29)  | 7732(3)  | 4019(2)  | 2590(3)  | 24(1) |
| C(30)  | 7640(5)  | 4071(3)  | 4257(4)  | 48(2) |
| C(31)  | 7220(20) | 3468(6)  | 4278(18) | 43(4) |
| C(32)  | 6936(9)  | 4534(5)  | 4245(8)  | 70(4) |
| C(31A) | 7250(50) | 3497(13) | 4410(50) | 42(7) |
| C(32A) | 7730(30) | 4507(13) | 4900(20) | 86(7) |
| C(33)  | 5328(3)  | 6229(2)  | -1290(3) | 21(1) |
| C(34)  | 4880(3)  | 5980(2)  | -2029(3) | 22(1) |
| C(35)  | 4542(3)  | 6359(2)  | -2741(3) | 24(1) |
| C(36)  | 4081(4)  | 6131(3)  | -3538(4) | 33(1) |
| C(37)  | 3821(4)  | 6493(3)  | -4249(4) | 41(1) |
| C(38)  | 3991(4)  | 7101(3)  | -4188(4) | 41(1) |
| C(39)  | 4404(4)  | 7336(3)  | -3420(4) | 34(1) |

|       |          |         |          |       |
|-------|----------|---------|----------|-------|
| C(40) | 4699(3)  | 6972(2) | -2674(3) | 26(1) |
| C(41) | 5146(3)  | 7200(2) | -1876(3) | 27(1) |
| C(42) | 5450(3)  | 6839(2) | -1185(3) | 21(1) |
| C(43) | 5945(3)  | 7065(2) | -345(3)  | 22(1) |
| C(44) | 6772(3)  | 6791(2) | 1084(3)  | 23(1) |
| C(45) | 7228(3)  | 6253(2) | 1519(3)  | 24(1) |
| C(46) | 6178(4)  | 7093(2) | 1723(3)  | 36(1) |
| C(47) | 5598(5)  | 6663(4) | 2187(4)  | 57(2) |
| C(48) | 6742(6)  | 7489(3) | 2388(5)  | 66(2) |
| C(49) | 9317(3)  | 3869(2) | 10852(3) | 23(1) |
| C(50) | 9218(3)  | 3270(2) | 10822(3) | 26(1) |
| C(51) | 9607(3)  | 2938(2) | 11562(3) | 24(1) |
| C(52) | 9518(3)  | 2316(2) | 11572(4) | 28(1) |
| C(53) | 9868(4)  | 2003(2) | 12303(4) | 31(1) |
| C(54) | 10326(4) | 2285(2) | 13055(4) | 34(1) |
| C(55) | 10422(4) | 2883(2) | 13058(4) | 33(1) |
| C(56) | 10070(3) | 3224(2) | 12310(3) | 25(1) |
| C(57) | 10160(3) | 3839(2) | 12309(3) | 25(1) |
| C(58) | 9787(3)  | 4161(2) | 11589(3) | 22(1) |
| C(59) | 9859(3)  | 4809(2) | 11567(3) | 21(1) |
| C(60) | 9417(3)  | 5690(2) | 10719(3) | 22(1) |
| C(61) | 8732(3)  | 5869(2) | 9938(3)  | 24(1) |
| C(62) | 10371(3) | 5934(2) | 10580(4) | 30(1) |
| C(63) | 10596(4) | 5858(2) | 9627(4)  | 38(1) |
| C(64) | 10469(4) | 6571(2) | 10874(5) | 42(1) |
| C(65) | 7905(3)  | 7414(2) | 8649(3)  | 25(1) |
| C(66) | 8313(3)  | 7669(2) | 9405(4)  | 26(1) |
| C(67) | 8292(3)  | 8287(2) | 9474(4)  | 29(1) |
| C(68) | 8685(3)  | 8583(2) | 10246(4) | 32(1) |
| C(69) | 8656(4)  | 9182(3) | 10309(4) | 37(1) |
| C(70) | 8246(4)  | 9514(3) | 9598(4)  | 38(1) |
| C(71) | 7862(4)  | 9247(2) | 8832(4)  | 37(1) |
| C(72) | 7869(3)  | 8624(2) | 8760(4)  | 31(1) |
| C(73) | 7444(4)  | 8341(2) | 7995(4)  | 36(1) |
| C(74) | 7455(4)  | 7735(2) | 7935(4)  | 30(1) |
| C(75) | 7008(4)  | 7418(3) | 7151(4)  | 33(1) |

|        |          |          |          |       |
|--------|----------|----------|----------|-------|
| C(76)  | 6714(3)  | 6461(3)  | 6482(3)  | 31(1) |
| C(77)  | 6663(3)  | 5835(2)  | 6794(3)  | 28(1) |
| C(78)  | 7253(4)  | 6491(3)  | 5644(3)  | 38(1) |
| C(79)  | 6644(5)  | 6337(4)  | 4808(4)  | 56(2) |
| C(80)  | 8112(4)  | 6110(3)  | 5755(5)  | 45(1) |
| O(16)  | 5975(6)  | 2827(3)  | 6529(6)  | 33(2) |
| O(17)  | 8115(9)  | 3616(8)  | 9114(9)  | 28(2) |
| O(18)  | 7559(7)  | 4364(5)  | 8302(8)  | 31(2) |
| N(6)   | 6567(6)  | 3694(4)  | 7100(7)  | 26(2) |
| C(81)  | 5360(6)  | 4339(4)  | 6030(7)  | 26(2) |
| C(82)  | 4765(6)  | 4704(4)  | 5562(6)  | 29(1) |
| C(83)  | 3956(3)  | 4457(3)  | 5089(5)  | 36(1) |
| C(84)  | 3305(5)  | 4822(2)  | 4642(5)  | 47(2) |
| C(85)  | 2500(4)  | 4587(3)  | 4223(5)  | 53(2) |
| C(86)  | 2347(4)  | 3987(3)  | 4252(5)  | 54(2) |
| C(87)  | 2998(4)  | 3623(2)  | 4699(5)  | 45(2) |
| C(88)  | 3803(4)  | 3858(2)  | 5118(4)  | 36(1) |
| C(89)  | 4470(6)  | 3488(4)  | 5584(6)  | 32(1) |
| C(90)  | 5239(6)  | 3734(4)  | 6043(6)  | 27(1) |
| C(91)  | 5951(6)  | 3360(4)  | 6564(6)  | 24(1) |
| C(92)  | 7285(7)  | 3401(4)  | 7673(7)  | 27(2) |
| C(93)  | 7679(7)  | 3831(5)  | 8410(7)  | 28(2) |
| C(94)  | 8082(7)  | 3171(5)  | 7160(8)  | 32(2) |
| C(95)  | 8663(9)  | 2722(5)  | 7720(9)  | 44(3) |
| C(96)  | 8686(13) | 3661(7)  | 6874(11) | 47(3) |
| O(16A) | 6300(9)  | 2684(5)  | 6569(9)  | 31(2) |
| O(17A) | 8303(15) | 3587(12) | 9124(12) | 27(2) |
| O(18A) | 7829(9)  | 4304(7)  | 8193(10) | 25(3) |
| N(6A)  | 6795(8)  | 3582(5)  | 7111(10) | 24(2) |
| C(81A) | 5436(9)  | 4158(6)  | 6146(11) | 26(2) |
| C(82A) | 4725(7)  | 4485(6)  | 5802(9)  | 30(2) |
| C(83A) | 3909(7)  | 4190(5)  | 5451(9)  | 34(2) |
| C(84A) | 3124(7)  | 4504(6)  | 5165(10) | 42(2) |
| C(85A) | 2311(9)  | 4222(6)  | 4903(11) | 48(2) |
| C(86A) | 2274(9)  | 3610(6)  | 4899(11) | 47(2) |
| C(87A) | 3045(8)  | 3290(5)  | 5183(10) | 41(2) |



|        |          |         |          |        |
|--------|----------|---------|----------|--------|
| C(88A) | 3867(7)  | 3583(5) | 5456(9)  | 35(2)  |
| C(89A) | 4651(8)  | 3255(6) | 5790(9)  | 31(2)  |
| C(90A) | 5423(8)  | 3552(6) | 6149(10) | 27(2)  |
| C(91A) | 6218(10) | 3213(5) | 6601(10) | 26(2)  |
| C(92A) | 7559(9)  | 3324(6) | 7663(10) | 26(2)  |
| C(93A) | 7902(12) | 3776(7) | 8388(11) | 27(2)  |
| C(94A) | 8358(10) | 3125(7) | 7130(11) | 31(2)  |
| C(95A) | 9062(12) | 2769(8) | 7710(13) | 40(3)  |
| C(96A) | 8768(16) | 3628(9) | 6657(12) | 32(3)  |
| CI(1)  | 4384(2)  | 5110(2) | 1678(2)  | 63(1)  |
| CI(2)  | 5622(3)  | 5209(2) | 3322(2)  | 73(1)  |
| CI(3)  | 4964(3)  | 4057(1) | 2689(3)  | 74(1)  |
| C(98)  | 5280(2)  | 4771(1) | 2374(2)  | 68(3)  |
| CI(1A) | 5223(3)  | 4875(2) | 1958(3)  | 61(1)  |
| CI(2A) | 4830(3)  | 5334(2) | 3664(3)  | 63(1)  |
| CI(3A) | 4465(3)  | 4112(2) | 3221(3)  | 65(1)  |
| C(98A) | 4487(12) | 4838(6) | 2777(10) | 65(2)  |
| CI(4)  | 4021(3)  | 6220(2) | 3487(3)  | 71(1)  |
| CI(5)  | 2192(4)  | 6580(4) | 3649(4)  | 104(2) |
| CI(6)  | 2690(4)  | 6210(3) | 1940(4)  | 90(2)  |
| C(99)  | 3169(10) | 6595(7) | 2985(8)  | 75(3)  |
| CI(4A) | 2392(6)  | 6531(3) | 3250(4)  | 102(2) |
| CI(5A) | 2308(3)  | 5285(2) | 3415(3)  | 69(1)  |
| CI(6A) | 2643(3)  | 5833(2) | 1746(2)  | 52(1)  |
| C(99A) | 2060(12) | 5897(6) | 2756(9)  | 66(3)  |
| C(100) | -361(7)  | 5271(4) | 7518(7)  | 84(3)  |
| C(101) | 234(7)   | 4989(4) | 6874(5)  | 76(3)  |
| O(19)  | 619(5)   | 4468(3) | 7262(4)  | 73(2)  |
| C(102) | 1191(6)  | 4168(4) | 6712(6)  | 80(2)  |
| C(103) | 1562(8)  | 3620(4) | 7193(9)  | 110(5) |
| CI(7)  | 2154(7)  | 4628(4) | 6311(6)  | 67(2)  |
| CI(8)  | 1281(8)  | 3636(5) | 6939(9)  | 83(3)  |
| CI(9)  | 434(8)   | 4790(5) | 7062(8)  | 74(3)  |
| C(104) | 1137(16) | 4344(9) | 6410(20) | 75(3)  |

Table 3. Bond lengths [Å] and angles [°] for 4468ds.

---

|             |           |
|-------------|-----------|
| I(1)-N(1)   | 2.097(4)  |
| I(1)-C(1)   | 2.107(5)  |
| I(1)-O(5)   | 2.370(3)  |
| I(2)-C(17)  | 2.102(4)  |
| I(2)-N(2)   | 2.104(4)  |
| I(2)-O(8)   | 2.340(3)  |
| I(3)-C(33)  | 2.105(4)  |
| I(3)-N(3)   | 2.107(4)  |
| I(3)-O(2)   | 2.341(3)  |
| I(4)-C(49)  | 2.098(5)  |
| I(4)-N(4)   | 2.109(4)  |
| I(4)-O(17A) | 2.37(3)   |
| I(4)-O(17)  | 2.397(17) |
| I(5)-N(5)   | 2.098(4)  |
| I(5)-C(65)  | 2.104(5)  |
| I(5)-O(11)  | 2.363(3)  |
| I(6)-N(6)   | 1.996(9)  |
| I(6)-C(81A) | 2.097(12) |
| I(6)-C(81)  | 2.130(8)  |
| I(6)-N(6A)  | 2.282(13) |
| I(6)-O(14)  | 2.353(4)  |
| I(6)-O(18)  | 2.482(12) |
| O(1)-C(11)  | 1.235(6)  |
| O(2)-C(13)  | 1.282(6)  |
| O(3)-C(13)  | 1.246(6)  |
| O(4)-C(27)  | 1.223(6)  |
| O(5)-C(29)  | 1.285(6)  |
| O(6)-C(29)  | 1.242(6)  |
| O(7)-C(43)  | 1.230(6)  |
| O(8)-C(45)  | 1.286(6)  |
| O(9)-C(45)  | 1.235(6)  |
| O(10)-C(59) | 1.229(6)  |
| O(11)-C(61) | 1.290(6)  |
| O(12)-C(61) | 1.239(6)  |

|             |          |
|-------------|----------|
| O(13)-C(75) | 1.217(7) |
| O(14)-C(77) | 1.278(6) |
| O(15)-C(77) | 1.245(6) |
| N(1)-C(11)  | 1.353(6) |
| N(1)-C(12)  | 1.473(6) |
| N(2)-C(27)  | 1.360(6) |
| N(2)-C(28)  | 1.459(6) |
| N(3)-C(43)  | 1.369(6) |
| N(3)-C(44)  | 1.473(6) |
| N(4)-C(59)  | 1.354(6) |
| N(4)-C(60)  | 1.480(6) |
| N(5)-C(75)  | 1.365(7) |
| N(5)-C(76)  | 1.472(7) |
| C(1)-C(2)   | 1.363(7) |
| C(1)-C(10)  | 1.403(7) |
| C(2)-C(3)   | 1.433(7) |
| C(2)-H(2)   | 0.9500   |
| C(3)-C(4)   | 1.419(7) |
| C(3)-C(8)   | 1.427(7) |
| C(4)-C(5)   | 1.363(7) |
| C(4)-H(4)   | 0.9500   |
| C(5)-C(6)   | 1.403(8) |
| C(5)-H(5)   | 0.9500   |
| C(6)-C(7)   | 1.369(7) |
| C(6)-H(6)   | 0.9500   |
| C(7)-C(8)   | 1.435(7) |
| C(7)-H(7)   | 0.9500   |
| C(8)-C(9)   | 1.409(7) |
| C(9)-C(10)  | 1.385(6) |
| C(9)-H(9)   | 0.9500   |
| C(10)-C(11) | 1.485(6) |
| C(12)-C(13) | 1.516(6) |
| C(12)-C(14) | 1.561(6) |
| C(12)-H(12) | 1.0000   |
| C(14)-C(15) | 1.517(7) |
| C(14)-C(16) | 1.523(7) |

|              |           |
|--------------|-----------|
| C(14)-H(14)  | 1.0000    |
| C(15)-H(15A) | 0.9800    |
| C(15)-H(15B) | 0.9800    |
| C(15)-H(15C) | 0.9800    |
| C(16)-H(16A) | 0.9800    |
| C(16)-H(16B) | 0.9800    |
| C(16)-H(16C) | 0.9800    |
| C(17)-C(18)  | 1.368(7)  |
| C(17)-C(26)  | 1.408(7)  |
| C(18)-C(19)  | 1.425(6)  |
| C(18)-H(18)  | 0.9500    |
| C(19)-C(24)  | 1.414(8)  |
| C(19)-C(20)  | 1.416(7)  |
| C(20)-C(21)  | 1.373(8)  |
| C(20)-H(20)  | 0.9500    |
| C(21)-C(22)  | 1.400(9)  |
| C(21)-H(21)  | 0.9500    |
| C(22)-C(23)  | 1.357(9)  |
| C(22)-H(22)  | 0.9500    |
| C(23)-C(24)  | 1.431(7)  |
| C(23)-H(23)  | 0.9500    |
| C(24)-C(25)  | 1.407(8)  |
| C(25)-C(26)  | 1.370(7)  |
| C(25)-H(25)  | 0.9500    |
| C(26)-C(27)  | 1.493(7)  |
| C(28)-C(29)  | 1.516(6)  |
| C(28)-C(30)  | 1.566(8)  |
| C(28)-H(28)  | 1.0000    |
| C(30)-C(32A) | 1.39(2)   |
| C(30)-C(31A) | 1.46(2)   |
| C(30)-C(32)  | 1.480(13) |
| C(30)-C(31)  | 1.517(11) |
| C(30)-H(30A) | 1.0000    |
| C(30)-H(30B) | 0.9(3)    |
| C(31)-H(31A) | 0.9800    |
| C(31)-H(31B) | 0.9800    |

|               |          |
|---------------|----------|
| C(31)-H(31C)  | 0.9800   |
| C(32)-H(32A)  | 0.9800   |
| C(32)-H(32B)  | 0.9800   |
| C(32)-H(32C)  | 0.9800   |
| C(31A)-H(31D) | 0.9800   |
| C(31A)-H(31E) | 0.9800   |
| C(31A)-H(31F) | 0.9800   |
| C(32A)-H(32D) | 0.9800   |
| C(32A)-H(32E) | 0.9800   |
| C(32A)-H(32F) | 0.9800   |
| C(33)-C(34)   | 1.361(6) |
| C(33)-C(42)   | 1.412(6) |
| C(34)-C(35)   | 1.429(6) |
| C(34)-H(34)   | 0.9500   |
| C(35)-C(36)   | 1.417(7) |
| C(35)-C(40)   | 1.422(7) |
| C(36)-C(37)   | 1.378(8) |
| C(36)-H(36)   | 0.9500   |
| C(37)-C(38)   | 1.414(9) |
| C(37)-H(37)   | 0.9500   |
| C(38)-C(39)   | 1.364(8) |
| C(38)-H(38)   | 0.9500   |
| C(39)-C(40)   | 1.431(7) |
| C(39)-H(39)   | 0.9500   |
| C(40)-C(41)   | 1.412(7) |
| C(41)-C(42)   | 1.369(7) |
| C(41)-H(41)   | 0.9500   |
| C(42)-C(43)   | 1.488(7) |
| C(44)-C(45)   | 1.518(6) |
| C(44)-C(46)   | 1.534(7) |
| C(44)-H(44)   | 1.0000   |
| C(46)-C(47)   | 1.520(9) |
| C(46)-C(48)   | 1.531(9) |
| C(46)-H(46)   | 1.0000   |
| C(47)-H(47A)  | 0.9800   |
| C(47)-H(47B)  | 0.9800   |

|              |          |
|--------------|----------|
| C(47)-H(47C) | 0.9800   |
| C(48)-H(48A) | 0.9800   |
| C(48)-H(48B) | 0.9800   |
| C(48)-H(48C) | 0.9800   |
| C(49)-C(50)  | 1.378(7) |
| C(49)-C(58)  | 1.414(7) |
| C(50)-C(51)  | 1.422(7) |
| C(50)-H(50)  | 0.9500   |
| C(51)-C(56)  | 1.417(7) |
| C(51)-C(52)  | 1.428(7) |
| C(52)-C(53)  | 1.371(7) |
| C(52)-H(52)  | 0.9500   |
| C(53)-C(54)  | 1.415(8) |
| C(53)-H(53)  | 0.9500   |
| C(54)-C(55)  | 1.373(8) |
| C(54)-H(54)  | 0.9500   |
| C(55)-C(56)  | 1.425(7) |
| C(55)-H(55)  | 0.9500   |
| C(56)-C(57)  | 1.412(7) |
| C(57)-C(58)  | 1.378(7) |
| C(57)-H(57)  | 0.9500   |
| C(58)-C(59)  | 1.487(6) |
| C(60)-C(61)  | 1.526(6) |
| C(60)-C(62)  | 1.546(7) |
| C(60)-H(60)  | 1.0000   |
| C(62)-C(63)  | 1.521(8) |
| C(62)-C(64)  | 1.524(7) |
| C(62)-H(62)  | 1.0000   |
| C(63)-H(63A) | 0.9800   |
| C(63)-H(63B) | 0.9800   |
| C(63)-H(63C) | 0.9800   |
| C(64)-H(64A) | 0.9800   |
| C(64)-H(64B) | 0.9800   |
| C(64)-H(64C) | 0.9800   |
| C(65)-C(66)  | 1.364(7) |
| C(65)-C(74)  | 1.412(7) |

|              |           |
|--------------|-----------|
| C(66)-C(67)  | 1.418(7)  |
| C(66)-H(66)  | 0.9500    |
| C(67)-C(72)  | 1.416(8)  |
| C(67)-C(68)  | 1.417(8)  |
| C(68)-C(69)  | 1.374(8)  |
| C(68)-H(68)  | 0.9500    |
| C(69)-C(70)  | 1.399(9)  |
| C(69)-H(69)  | 0.9500    |
| C(70)-C(71)  | 1.377(9)  |
| C(70)-H(70)  | 0.9500    |
| C(71)-C(72)  | 1.428(8)  |
| C(71)-H(71)  | 0.9500    |
| C(72)-C(73)  | 1.412(9)  |
| C(73)-C(74)  | 1.389(8)  |
| C(73)-H(73)  | 0.9500    |
| C(74)-C(75)  | 1.482(8)  |
| C(76)-C(77)  | 1.512(8)  |
| C(76)-C(78)  | 1.565(7)  |
| C(76)-H(76)  | 1.0000    |
| C(78)-C(79)  | 1.511(9)  |
| C(78)-C(80)  | 1.531(9)  |
| C(78)-H(78)  | 1.0000    |
| C(79)-H(79A) | 0.9800    |
| C(79)-H(79B) | 0.9800    |
| C(79)-H(79C) | 0.9800    |
| C(80)-H(80A) | 0.9800    |
| C(80)-H(80B) | 0.9800    |
| C(80)-H(80C) | 0.9800    |
| O(16)-C(91)  | 1.220(10) |
| O(17)-C(93)  | 1.281(9)  |
| O(18)-C(93)  | 1.240(9)  |
| N(6)-C(91)   | 1.379(8)  |
| N(6)-C(92)   | 1.457(11) |
| C(81)-C(82)  | 1.354(12) |
| C(81)-C(90)  | 1.395(12) |
| C(82)-C(83)  | 1.437(8)  |

|               |           |
|---------------|-----------|
| C(82)-H(82)   | 0.9500    |
| C(83)-C(84)   | 1.3900    |
| C(83)-C(88)   | 1.3900    |
| C(84)-C(85)   | 1.3900    |
| C(84)-H(84)   | 0.9500    |
| C(85)-C(86)   | 1.3900    |
| C(85)-H(85)   | 0.9500    |
| C(86)-C(87)   | 1.3900    |
| C(86)-H(86)   | 0.9500    |
| C(87)-C(88)   | 1.3900    |
| C(87)-H(87)   | 0.9500    |
| C(88)-C(89)   | 1.425(11) |
| C(89)-C(90)   | 1.383(9)  |
| C(89)-H(89)   | 0.9500    |
| C(90)-C(91)   | 1.507(13) |
| C(92)-C(93)   | 1.550(9)  |
| C(92)-C(94)   | 1.564(12) |
| C(92)-H(92)   | 1.0000    |
| C(94)-C(96)   | 1.521(12) |
| C(94)-C(95)   | 1.531(12) |
| C(94)-H(94)   | 1.0000    |
| C(95)-H(95A)  | 0.9800    |
| C(95)-H(95B)  | 0.9800    |
| C(95)-H(95C)  | 0.9800    |
| C(96)-H(96A)  | 0.9800    |
| C(96)-H(96B)  | 0.9800    |
| C(96)-H(96C)  | 0.9800    |
| O(16A)-C(91A) | 1.216(13) |
| O(17A)-C(93A) | 1.278(11) |
| O(18A)-C(93A) | 1.245(11) |
| N(6A)-C(91A)  | 1.375(11) |
| N(6A)-C(92A)  | 1.452(13) |
| C(81A)-C(82A) | 1.345(14) |
| C(81A)-C(90A) | 1.386(14) |
| C(82A)-C(83A) | 1.428(11) |
| C(82A)-H(82A) | 0.9500    |



|               |           |
|---------------|-----------|
| C(83A)-C(84A) | 1.390(11) |
| C(83A)-C(88A) | 1.390(11) |
| C(84A)-C(85A) | 1.380(11) |
| C(84A)-H(84A) | 0.9500    |
| C(85A)-C(86A) | 1.399(12) |
| C(85A)-H(85A) | 0.9500    |
| C(86A)-C(87A) | 1.381(12) |
| C(86A)-H(86A) | 0.9500    |
| C(87A)-C(88A) | 1.406(11) |
| C(87A)-H(87A) | 0.9500    |
| C(88A)-C(89A) | 1.422(14) |
| C(89A)-C(90A) | 1.385(11) |
| C(89A)-H(89A) | 0.9500    |
| C(90A)-C(91A) | 1.506(15) |
| C(92A)-C(93A) | 1.552(11) |
| C(92A)-C(94A) | 1.560(14) |
| C(92A)-H(92A) | 1.0000    |
| C(94A)-C(96A) | 1.514(13) |
| C(94A)-C(95A) | 1.521(14) |
| C(94A)-H(94A) | 1.0000    |
| C(95A)-H(95D) | 0.9800    |
| C(95A)-H(95E) | 0.9800    |
| C(95A)-H(95F) | 0.9800    |
| C(96A)-H(96D) | 0.9800    |
| C(96A)-H(96E) | 0.9800    |
| C(96A)-H(96F) | 0.9800    |
| CI(1)-C(98)   | 1.7762    |
| CI(2)-C(98)   | 1.7762    |
| CI(3)-C(98)   | 1.7761    |
| C(98)-H(98)   | 1.0000    |
| CI(1A)-C(98A) | 1.732(15) |
| CI(2A)-C(98A) | 1.789(14) |
| CI(3A)-C(98A) | 1.791(15) |
| C(98A)-H(98A) | 1.0000    |
| CI(4)-C(99)   | 1.638(13) |
| CI(5)-C(99)   | 1.839(13) |

|                   |            |
|-------------------|------------|
| Cl(6)-C(99)       | 1.877(16)  |
| C(99)-H(99)       | 1.0000     |
| Cl(4A)-C(99A)     | 1.678(15)  |
| Cl(5A)-C(99A)     | 1.734(14)  |
| Cl(6A)-C(99A)     | 1.834(14)  |
| C(99A)-H(99A)     | 1.0000     |
| C(100)-C(101)     | 1.5202     |
| C(100)-H(10A)     | 0.9800     |
| C(100)-H(10B)     | 0.9800     |
| C(100)-H(10C)     | 0.9800     |
| C(101)-O(19)      | 1.4205     |
| C(101)-H(10D)     | 0.9900     |
| C(101)-H(10E)     | 0.9900     |
| O(19)-C(102)      | 1.4204     |
| C(102)-C(103)     | 1.5202     |
| C(102)-H(10F)     | 0.9900     |
| C(102)-H(10G)     | 0.9900     |
| C(103)-H(10H)     | 0.9800     |
| C(103)-H(10I)     | 0.9800     |
| C(103)-H(10J)     | 0.9800     |
| Cl(7)-C(104)      | 1.65(2)    |
| Cl(8)-C(104)      | 1.80(2)    |
| Cl(9)-C(104)      | 1.81(2)    |
| C(104)-H(104)     | 1.0000     |
|                   |            |
| N(1)-I(1)-C(1)    | 79.81(17)  |
| N(1)-I(1)-O(5)    | 164.16(13) |
| C(1)-I(1)-O(5)    | 84.37(15)  |
| C(17)-I(2)-N(2)   | 79.30(17)  |
| C(17)-I(2)-O(8)   | 84.18(15)  |
| N(2)-I(2)-O(8)    | 163.48(14) |
| C(33)-I(3)-N(3)   | 79.97(17)  |
| C(33)-I(3)-O(2)   | 84.49(15)  |
| N(3)-I(3)-O(2)    | 164.46(13) |
| C(49)-I(4)-N(4)   | 79.62(16)  |
| C(49)-I(4)-O(17A) | 82.2(4)    |

|                   |            |
|-------------------|------------|
| N(4)-I(4)-O(17A)  | 161.1(4)   |
| C(49)-I(4)-O(17)  | 85.7(3)    |
| N(4)-I(4)-O(17)   | 165.3(3)   |
| N(5)-I(5)-C(65)   | 79.87(19)  |
| N(5)-I(5)-O(11)   | 164.44(15) |
| C(65)-I(5)-O(11)  | 84.57(17)  |
| N(6)-I(6)-C(81)   | 82.0(3)    |
| C(81A)-I(6)-N(6A) | 75.7(4)    |
| N(6)-I(6)-O(14)   | 161.0(3)   |
| C(81A)-I(6)-O(14) | 92.0(4)    |
| C(81)-I(6)-O(14)  | 79.6(3)    |
| N(6A)-I(6)-O(14)  | 163.8(4)   |
| N(6)-I(6)-O(18)   | 72.8(3)    |
| C(81)-I(6)-O(18)  | 150.8(4)   |
| O(14)-I(6)-O(18)  | 126.1(3)   |
| C(13)-O(2)-I(3)   | 105.1(3)   |
| C(29)-O(5)-I(1)   | 103.6(3)   |
| C(45)-O(8)-I(2)   | 103.7(3)   |
| C(61)-O(11)-I(5)  | 103.7(3)   |
| C(77)-O(14)-I(6)  | 103.7(3)   |
| C(11)-N(1)-C(12)  | 118.9(4)   |
| C(11)-N(1)-I(1)   | 116.1(3)   |
| C(12)-N(1)-I(1)   | 124.6(3)   |
| C(27)-N(2)-C(28)  | 120.4(4)   |
| C(27)-N(2)-I(2)   | 117.2(3)   |
| C(28)-N(2)-I(2)   | 122.3(3)   |
| C(43)-N(3)-C(44)  | 118.7(4)   |
| C(43)-N(3)-I(3)   | 116.4(3)   |
| C(44)-N(3)-I(3)   | 124.6(3)   |
| C(59)-N(4)-C(60)  | 118.5(4)   |
| C(59)-N(4)-I(4)   | 116.9(3)   |
| C(60)-N(4)-I(4)   | 124.4(3)   |
| C(75)-N(5)-C(76)  | 117.9(4)   |
| C(75)-N(5)-I(5)   | 116.7(4)   |
| C(76)-N(5)-I(5)   | 124.5(3)   |
| C(2)-C(1)-C(10)   | 123.2(4)   |

|                   |          |
|-------------------|----------|
| C(2)-C(1)-I(1)    | 125.7(4) |
| C(10)-C(1)-I(1)   | 111.1(3) |
| C(1)-C(2)-C(3)    | 117.9(5) |
| C(1)-C(2)-H(2)    | 121.1    |
| C(3)-C(2)-H(2)    | 121.1    |
| C(4)-C(3)-C(8)    | 119.0(4) |
| C(4)-C(3)-C(2)    | 121.2(5) |
| C(8)-C(3)-C(2)    | 119.8(4) |
| C(5)-C(4)-C(3)    | 120.8(5) |
| C(5)-C(4)-H(4)    | 119.6    |
| C(3)-C(4)-H(4)    | 119.6    |
| C(4)-C(5)-C(6)    | 120.9(5) |
| C(4)-C(5)-H(5)    | 119.6    |
| C(6)-C(5)-H(5)    | 119.6    |
| C(7)-C(6)-C(5)    | 120.5(5) |
| C(7)-C(6)-H(6)    | 119.8    |
| C(5)-C(6)-H(6)    | 119.8    |
| C(6)-C(7)-C(8)    | 120.6(5) |
| C(6)-C(7)-H(7)    | 119.7    |
| C(8)-C(7)-H(7)    | 119.7    |
| C(9)-C(8)-C(3)    | 119.6(4) |
| C(9)-C(8)-C(7)    | 122.1(5) |
| C(3)-C(8)-C(7)    | 118.2(4) |
| C(10)-C(9)-C(8)   | 119.8(5) |
| C(10)-C(9)-H(9)   | 120.1    |
| C(8)-C(9)-H(9)    | 120.1    |
| C(9)-C(10)-C(1)   | 119.7(4) |
| C(9)-C(10)-C(11)  | 121.4(4) |
| C(1)-C(10)-C(11)  | 118.8(4) |
| O(1)-C(11)-N(1)   | 123.6(4) |
| O(1)-C(11)-C(10)  | 123.3(4) |
| N(1)-C(11)-C(10)  | 113.0(4) |
| N(1)-C(12)-C(13)  | 110.7(4) |
| N(1)-C(12)-C(14)  | 110.1(4) |
| C(13)-C(12)-C(14) | 111.4(4) |
| N(1)-C(12)-H(12)  | 108.2    |

|                     |          |
|---------------------|----------|
| C(13)-C(12)-H(12)   | 108.2    |
| C(14)-C(12)-H(12)   | 108.2    |
| O(3)-C(13)-O(2)     | 122.8(4) |
| O(3)-C(13)-C(12)    | 120.5(4) |
| O(2)-C(13)-C(12)    | 116.6(4) |
| C(15)-C(14)-C(16)   | 113.2(4) |
| C(15)-C(14)-C(12)   | 111.7(4) |
| C(16)-C(14)-C(12)   | 111.0(4) |
| C(15)-C(14)-H(14)   | 106.8    |
| C(16)-C(14)-H(14)   | 106.8    |
| C(12)-C(14)-H(14)   | 106.8    |
| C(14)-C(15)-H(15A)  | 109.5    |
| C(14)-C(15)-H(15B)  | 109.5    |
| H(15A)-C(15)-H(15B) | 109.5    |
| C(14)-C(15)-H(15C)  | 109.5    |
| H(15A)-C(15)-H(15C) | 109.5    |
| H(15B)-C(15)-H(15C) | 109.5    |
| C(14)-C(16)-H(16A)  | 109.5    |
| C(14)-C(16)-H(16B)  | 109.5    |
| H(16A)-C(16)-H(16B) | 109.5    |
| C(14)-C(16)-H(16C)  | 109.5    |
| H(16A)-C(16)-H(16C) | 109.5    |
| H(16B)-C(16)-H(16C) | 109.5    |
| C(18)-C(17)-C(26)   | 123.1(4) |
| C(18)-C(17)-I(2)    | 125.2(3) |
| C(26)-C(17)-I(2)    | 111.7(3) |
| C(17)-C(18)-C(19)   | 117.8(4) |
| C(17)-C(18)-H(18)   | 121.1    |
| C(19)-C(18)-H(18)   | 121.1    |
| C(24)-C(19)-C(20)   | 119.5(5) |
| C(24)-C(19)-C(18)   | 119.8(5) |
| C(20)-C(19)-C(18)   | 120.7(5) |
| C(21)-C(20)-C(19)   | 120.1(5) |
| C(21)-C(20)-H(20)   | 119.9    |
| C(19)-C(20)-H(20)   | 119.9    |
| C(20)-C(21)-C(22)   | 120.4(6) |

|                     |           |
|---------------------|-----------|
| C(20)-C(21)-H(21)   | 119.8     |
| C(22)-C(21)-H(21)   | 119.8     |
| C(23)-C(22)-C(21)   | 121.1(5)  |
| C(23)-C(22)-H(22)   | 119.5     |
| C(21)-C(22)-H(22)   | 119.5     |
| C(22)-C(23)-C(24)   | 120.3(6)  |
| C(22)-C(23)-H(23)   | 119.9     |
| C(24)-C(23)-H(23)   | 119.9     |
| C(25)-C(24)-C(19)   | 119.7(5)  |
| C(25)-C(24)-C(23)   | 121.7(5)  |
| C(19)-C(24)-C(23)   | 118.6(5)  |
| C(26)-C(25)-C(24)   | 120.6(5)  |
| C(26)-C(25)-H(25)   | 119.7     |
| C(24)-C(25)-H(25)   | 119.7     |
| C(25)-C(26)-C(17)   | 118.9(5)  |
| C(25)-C(26)-C(27)   | 121.9(5)  |
| C(17)-C(26)-C(27)   | 119.0(4)  |
| O(4)-C(27)-N(2)     | 124.5(5)  |
| O(4)-C(27)-C(26)    | 123.4(5)  |
| N(2)-C(27)-C(26)    | 112.0(4)  |
| N(2)-C(28)-C(29)    | 109.8(4)  |
| N(2)-C(28)-C(30)    | 110.6(4)  |
| C(29)-C(28)-C(30)   | 111.1(5)  |
| N(2)-C(28)-H(28)    | 108.5     |
| C(29)-C(28)-H(28)   | 108.5     |
| C(30)-C(28)-H(28)   | 108.5     |
| O(6)-C(29)-O(5)     | 122.6(4)  |
| O(6)-C(29)-C(28)    | 119.3(4)  |
| O(5)-C(29)-C(28)    | 118.1(4)  |
| C(32A)-C(30)-C(31A) | 123(3)    |
| C(32)-C(30)-C(31)   | 111.2(14) |
| C(32A)-C(30)-C(28)  | 116.7(13) |
| C(31A)-C(30)-C(28)  | 117(2)    |
| C(32)-C(30)-C(28)   | 114.3(6)  |
| C(31)-C(30)-C(28)   | 110.9(11) |
| C(32)-C(30)-H(30A)  | 106.7     |

|                      |          |
|----------------------|----------|
| C(31)-C(30)-H(30A)   | 106.7    |
| C(28)-C(30)-H(30A)   | 106.7    |
| C(32A)-C(30)-H(30B)  | 108(10)  |
| C(31A)-C(30)-H(30B)  | 98(10)   |
| C(28)-C(30)-H(30B)   | 80(10)   |
| C(30)-C(31)-H(31A)   | 109.5    |
| C(30)-C(31)-H(31B)   | 109.5    |
| H(31A)-C(31)-H(31B)  | 109.5    |
| C(30)-C(31)-H(31C)   | 109.5    |
| H(31A)-C(31)-H(31C)  | 109.5    |
| H(31B)-C(31)-H(31C)  | 109.5    |
| C(30)-C(32)-H(32A)   | 109.5    |
| C(30)-C(32)-H(32B)   | 109.5    |
| H(32A)-C(32)-H(32B)  | 109.5    |
| C(30)-C(32)-H(32C)   | 109.5    |
| H(32A)-C(32)-H(32C)  | 109.5    |
| H(32B)-C(32)-H(32C)  | 109.5    |
| C(30)-C(31A)-H(31D)  | 109.5    |
| C(30)-C(31A)-H(31E)  | 109.5    |
| H(31D)-C(31A)-H(31E) | 109.5    |
| C(30)-C(31A)-H(31F)  | 109.5    |
| H(31D)-C(31A)-H(31F) | 109.5    |
| H(31E)-C(31A)-H(31F) | 109.5    |
| C(30)-C(32A)-H(32D)  | 109.5    |
| C(30)-C(32A)-H(32E)  | 109.5    |
| H(32D)-C(32A)-H(32E) | 109.5    |
| C(30)-C(32A)-H(32F)  | 109.5    |
| H(32D)-C(32A)-H(32F) | 109.5    |
| H(32E)-C(32A)-H(32F) | 109.5    |
| C(34)-C(33)-C(42)    | 123.4(4) |
| C(34)-C(33)-I(3)     | 125.0(3) |
| C(42)-C(33)-I(3)     | 111.6(3) |
| C(33)-C(34)-C(35)    | 117.7(4) |
| C(33)-C(34)-H(34)    | 121.2    |
| C(35)-C(34)-H(34)    | 121.2    |
| C(36)-C(35)-C(40)    | 118.8(5) |

|                   |          |
|-------------------|----------|
| C(36)-C(35)-C(34) | 121.0(5) |
| C(40)-C(35)-C(34) | 120.2(4) |
| C(37)-C(36)-C(35) | 120.7(5) |
| C(37)-C(36)-H(36) | 119.6    |
| C(35)-C(36)-H(36) | 119.6    |
| C(36)-C(37)-C(38) | 120.5(5) |
| C(36)-C(37)-H(37) | 119.7    |
| C(38)-C(37)-H(37) | 119.7    |
| C(39)-C(38)-C(37) | 120.1(5) |
| C(39)-C(38)-H(38) | 119.9    |
| C(37)-C(38)-H(38) | 119.9    |
| C(38)-C(39)-C(40) | 120.8(5) |
| C(38)-C(39)-H(39) | 119.6    |
| C(40)-C(39)-H(39) | 119.6    |
| C(41)-C(40)-C(35) | 118.9(4) |
| C(41)-C(40)-C(39) | 122.2(5) |
| C(35)-C(40)-C(39) | 119.0(5) |
| C(42)-C(41)-C(40) | 120.9(5) |
| C(42)-C(41)-H(41) | 119.5    |
| C(40)-C(41)-H(41) | 119.5    |
| C(41)-C(42)-C(33) | 118.9(5) |
| C(41)-C(42)-C(43) | 122.2(4) |
| C(33)-C(42)-C(43) | 118.9(4) |
| O(7)-C(43)-N(3)   | 123.7(4) |
| O(7)-C(43)-C(42)  | 123.2(4) |
| N(3)-C(43)-C(42)  | 113.1(4) |
| N(3)-C(44)-C(45)  | 110.2(4) |
| N(3)-C(44)-C(46)  | 111.2(4) |
| C(45)-C(44)-C(46) | 110.3(4) |
| N(3)-C(44)-H(44)  | 108.4    |
| C(45)-C(44)-H(44) | 108.4    |
| C(46)-C(44)-H(44) | 108.4    |
| O(9)-C(45)-O(8)   | 122.7(4) |
| O(9)-C(45)-C(44)  | 120.4(4) |
| O(8)-C(45)-C(44)  | 116.9(4) |
| C(47)-C(46)-C(48) | 111.8(6) |



|                     |          |
|---------------------|----------|
| C(47)-C(46)-C(44)   | 112.7(5) |
| C(48)-C(46)-C(44)   | 111.9(6) |
| C(47)-C(46)-H(46)   | 106.6    |
| C(48)-C(46)-H(46)   | 106.6    |
| C(44)-C(46)-H(46)   | 106.6    |
| C(46)-C(47)-H(47A)  | 109.5    |
| C(46)-C(47)-H(47B)  | 109.5    |
| H(47A)-C(47)-H(47B) | 109.5    |
| C(46)-C(47)-H(47C)  | 109.5    |
| H(47A)-C(47)-H(47C) | 109.5    |
| H(47B)-C(47)-H(47C) | 109.5    |
| C(46)-C(48)-H(48A)  | 109.5    |
| C(46)-C(48)-H(48B)  | 109.5    |
| H(48A)-C(48)-H(48B) | 109.5    |
| C(46)-C(48)-H(48C)  | 109.5    |
| H(48A)-C(48)-H(48C) | 109.5    |
| H(48B)-C(48)-H(48C) | 109.5    |
| C(50)-C(49)-C(58)   | 122.4(5) |
| C(50)-C(49)-I(4)    | 125.8(4) |
| C(58)-C(49)-I(4)    | 111.7(3) |
| C(49)-C(50)-C(51)   | 118.2(5) |
| C(49)-C(50)-H(50)   | 120.9    |
| C(51)-C(50)-H(50)   | 120.9    |
| C(56)-C(51)-C(50)   | 120.0(4) |
| C(56)-C(51)-C(52)   | 119.2(5) |
| C(50)-C(51)-C(52)   | 120.7(5) |
| C(53)-C(52)-C(51)   | 120.1(5) |
| C(53)-C(52)-H(52)   | 120.0    |
| C(51)-C(52)-H(52)   | 120.0    |
| C(52)-C(53)-C(54)   | 121.0(5) |
| C(52)-C(53)-H(53)   | 119.5    |
| C(54)-C(53)-H(53)   | 119.5    |
| C(55)-C(54)-C(53)   | 119.8(5) |
| C(55)-C(54)-H(54)   | 120.1    |
| C(53)-C(54)-H(54)   | 120.1    |
| C(54)-C(55)-C(56)   | 120.9(5) |

|                     |          |
|---------------------|----------|
| C(54)-C(55)-H(55)   | 119.6    |
| C(56)-C(55)-H(55)   | 119.6    |
| C(57)-C(56)-C(51)   | 119.7(5) |
| C(57)-C(56)-C(55)   | 121.3(5) |
| C(51)-C(56)-C(55)   | 118.9(5) |
| C(58)-C(57)-C(56)   | 120.2(5) |
| C(58)-C(57)-H(57)   | 119.9    |
| C(56)-C(57)-H(57)   | 119.9    |
| C(57)-C(58)-C(49)   | 119.4(5) |
| C(57)-C(58)-C(59)   | 121.8(5) |
| C(49)-C(58)-C(59)   | 118.8(4) |
| O(10)-C(59)-N(4)    | 124.0(4) |
| O(10)-C(59)-C(58)   | 123.1(4) |
| N(4)-C(59)-C(58)    | 112.9(4) |
| N(4)-C(60)-C(61)    | 110.1(4) |
| N(4)-C(60)-C(62)    | 111.6(4) |
| C(61)-C(60)-C(62)   | 109.4(4) |
| N(4)-C(60)-H(60)    | 108.5    |
| C(61)-C(60)-H(60)   | 108.5    |
| C(62)-C(60)-H(60)   | 108.5    |
| O(12)-C(61)-O(11)   | 123.1(4) |
| O(12)-C(61)-C(60)   | 120.5(4) |
| O(11)-C(61)-C(60)   | 116.3(4) |
| C(63)-C(62)-C(64)   | 111.3(5) |
| C(63)-C(62)-C(60)   | 112.3(4) |
| C(64)-C(62)-C(60)   | 111.4(4) |
| C(63)-C(62)-H(62)   | 107.2    |
| C(64)-C(62)-H(62)   | 107.2    |
| C(60)-C(62)-H(62)   | 107.2    |
| C(62)-C(63)-H(63A)  | 109.5    |
| C(62)-C(63)-H(63B)  | 109.5    |
| H(63A)-C(63)-H(63B) | 109.5    |
| C(62)-C(63)-H(63C)  | 109.5    |
| H(63A)-C(63)-H(63C) | 109.5    |
| H(63B)-C(63)-H(63C) | 109.5    |
| C(62)-C(64)-H(64A)  | 109.5    |

|                     |          |
|---------------------|----------|
| C(62)-C(64)-H(64B)  | 109.5    |
| H(64A)-C(64)-H(64B) | 109.5    |
| C(62)-C(64)-H(64C)  | 109.5    |
| H(64A)-C(64)-H(64C) | 109.5    |
| H(64B)-C(64)-H(64C) | 109.5    |
| C(66)-C(65)-C(74)   | 123.2(5) |
| C(66)-C(65)-I(5)    | 125.7(4) |
| C(74)-C(65)-I(5)    | 111.1(4) |
| C(65)-C(66)-C(67)   | 118.5(5) |
| C(65)-C(66)-H(66)   | 120.7    |
| C(67)-C(66)-H(66)   | 120.7    |
| C(72)-C(67)-C(68)   | 118.5(5) |
| C(72)-C(67)-C(66)   | 119.8(5) |
| C(68)-C(67)-C(66)   | 121.7(5) |
| C(69)-C(68)-C(67)   | 121.3(6) |
| C(69)-C(68)-H(68)   | 119.4    |
| C(67)-C(68)-H(68)   | 119.4    |
| C(68)-C(69)-C(70)   | 120.1(6) |
| C(68)-C(69)-H(69)   | 119.9    |
| C(70)-C(69)-H(69)   | 119.9    |
| C(71)-C(70)-C(69)   | 120.7(5) |
| C(71)-C(70)-H(70)   | 119.7    |
| C(69)-C(70)-H(70)   | 119.7    |
| C(70)-C(71)-C(72)   | 120.1(6) |
| C(70)-C(71)-H(71)   | 120.0    |
| C(72)-C(71)-H(71)   | 120.0    |
| C(73)-C(72)-C(67)   | 119.8(5) |
| C(73)-C(72)-C(71)   | 120.9(5) |
| C(67)-C(72)-C(71)   | 119.3(5) |
| C(74)-C(73)-C(72)   | 120.2(5) |
| C(74)-C(73)-H(73)   | 119.9    |
| C(72)-C(73)-H(73)   | 119.9    |
| C(73)-C(74)-C(65)   | 118.5(5) |
| C(73)-C(74)-C(75)   | 122.1(5) |
| C(65)-C(74)-C(75)   | 119.4(5) |
| O(13)-C(75)-N(5)    | 123.9(6) |

|                     |          |
|---------------------|----------|
| O(13)-C(75)-C(74)   | 123.7(5) |
| N(5)-C(75)-C(74)    | 112.4(5) |
| N(5)-C(76)-C(77)    | 110.1(4) |
| N(5)-C(76)-C(78)    | 110.6(4) |
| C(77)-C(76)-C(78)   | 109.9(5) |
| N(5)-C(76)-H(76)    | 108.7    |
| C(77)-C(76)-H(76)   | 108.7    |
| C(78)-C(76)-H(76)   | 108.7    |
| O(15)-C(77)-O(14)   | 122.1(5) |
| O(15)-C(77)-C(76)   | 119.9(5) |
| O(14)-C(77)-C(76)   | 117.8(4) |
| C(79)-C(78)-C(80)   | 111.6(6) |
| C(79)-C(78)-C(76)   | 111.1(5) |
| C(80)-C(78)-C(76)   | 111.7(5) |
| C(79)-C(78)-H(78)   | 107.4    |
| C(80)-C(78)-H(78)   | 107.4    |
| C(76)-C(78)-H(78)   | 107.4    |
| C(78)-C(79)-H(79A)  | 109.5    |
| C(78)-C(79)-H(79B)  | 109.5    |
| H(79A)-C(79)-H(79B) | 109.5    |
| C(78)-C(79)-H(79C)  | 109.5    |
| H(79A)-C(79)-H(79C) | 109.5    |
| H(79B)-C(79)-H(79C) | 109.5    |
| C(78)-C(80)-H(80A)  | 109.5    |
| C(78)-C(80)-H(80B)  | 109.5    |
| H(80A)-C(80)-H(80B) | 109.5    |
| C(78)-C(80)-H(80C)  | 109.5    |
| H(80A)-C(80)-H(80C) | 109.5    |
| H(80B)-C(80)-H(80C) | 109.5    |
| C(93)-O(17)-I(4)    | 103.3(8) |
| C(93)-O(18)-I(6)    | 110.7(7) |
| C(91)-N(6)-C(92)    | 119.1(8) |
| C(91)-N(6)-I(6)     | 117.5(6) |
| C(92)-N(6)-I(6)     | 123.0(5) |
| C(82)-C(81)-C(90)   | 122.9(8) |
| C(82)-C(81)-I(6)    | 128.2(7) |

|                   |          |
|-------------------|----------|
| C(90)-C(81)-I(6)  | 108.7(6) |
| C(81)-C(82)-C(83) | 118.2(8) |
| C(81)-C(82)-H(82) | 120.9    |
| C(83)-C(82)-H(82) | 120.9    |
| C(84)-C(83)-C(88) | 120.0    |
| C(84)-C(83)-C(82) | 119.9(5) |
| C(88)-C(83)-C(82) | 120.0(6) |
| C(83)-C(84)-C(85) | 120.0    |
| C(83)-C(84)-H(84) | 120.0    |
| C(85)-C(84)-H(84) | 120.0    |
| C(86)-C(85)-C(84) | 120.0    |
| C(86)-C(85)-H(85) | 120.0    |
| C(84)-C(85)-H(85) | 120.0    |
| C(85)-C(86)-C(87) | 120.0    |
| C(85)-C(86)-H(86) | 120.0    |
| C(87)-C(86)-H(86) | 120.0    |
| C(88)-C(87)-C(86) | 120.0    |
| C(88)-C(87)-H(87) | 120.0    |
| C(86)-C(87)-H(87) | 120.0    |
| C(87)-C(88)-C(83) | 120.0    |
| C(87)-C(88)-C(89) | 120.3(5) |
| C(83)-C(88)-C(89) | 119.7(5) |
| C(90)-C(89)-C(88) | 119.4(8) |
| C(90)-C(89)-H(89) | 120.3    |
| C(88)-C(89)-H(89) | 120.3    |
| C(89)-C(90)-C(81) | 119.6(9) |
| C(89)-C(90)-C(91) | 121.3(8) |
| C(81)-C(90)-C(91) | 119.1(6) |
| O(16)-C(91)-N(6)  | 123.9(9) |
| O(16)-C(91)-C(90) | 124.3(7) |
| N(6)-C(91)-C(90)  | 111.8(7) |
| N(6)-C(92)-C(93)  | 109.2(7) |
| N(6)-C(92)-C(94)  | 113.3(7) |
| C(93)-C(92)-C(94) | 109.0(7) |
| N(6)-C(92)-H(92)  | 108.4    |
| C(93)-C(92)-H(92) | 108.4    |

|                      |           |
|----------------------|-----------|
| C(94)-C(92)-H(92)    | 108.4     |
| O(18)-C(93)-O(17)    | 122.6(9)  |
| O(18)-C(93)-C(92)    | 119.4(8)  |
| O(17)-C(93)-C(92)    | 118.0(9)  |
| C(96)-C(94)-C(95)    | 110.0(10) |
| C(96)-C(94)-C(92)    | 112.6(8)  |
| C(95)-C(94)-C(92)    | 110.9(8)  |
| C(96)-C(94)-H(94)    | 107.8     |
| C(95)-C(94)-H(94)    | 107.8     |
| C(92)-C(94)-H(94)    | 107.8     |
| C(94)-C(95)-H(95A)   | 109.5     |
| C(94)-C(95)-H(95B)   | 109.5     |
| H(95A)-C(95)-H(95B)  | 109.5     |
| C(94)-C(95)-H(95C)   | 109.5     |
| H(95A)-C(95)-H(95C)  | 109.5     |
| H(95B)-C(95)-H(95C)  | 109.5     |
| C(94)-C(96)-H(96A)   | 109.5     |
| C(94)-C(96)-H(96B)   | 109.5     |
| H(96A)-C(96)-H(96B)  | 109.5     |
| C(94)-C(96)-H(96C)   | 109.5     |
| H(96A)-C(96)-H(96C)  | 109.5     |
| H(96B)-C(96)-H(96C)  | 109.5     |
| C(93A)-O(17A)-I(4)   | 102.6(12) |
| C(91A)-N(6A)-C(92A)  | 117.8(10) |
| C(91A)-N(6A)-I(6)    | 116.4(8)  |
| C(92A)-N(6A)-I(6)    | 125.7(8)  |
| C(82A)-C(81A)-C(90A) | 123.2(11) |
| C(82A)-C(81A)-I(6)   | 119.3(9)  |
| C(90A)-C(81A)-I(6)   | 116.5(8)  |
| C(81A)-C(82A)-C(83A) | 118.0(12) |
| C(81A)-C(82A)-H(82A) | 121.0     |
| C(83A)-C(82A)-H(82A) | 121.0     |
| C(84A)-C(83A)-C(88A) | 118.8(9)  |
| C(84A)-C(83A)-C(82A) | 120.7(10) |
| C(88A)-C(83A)-C(82A) | 120.3(10) |
| C(85A)-C(84A)-C(83A) | 120.9(11) |

|                      |           |
|----------------------|-----------|
| C(85A)-C(84A)-H(84A) | 119.5     |
| C(83A)-C(84A)-H(84A) | 119.5     |
| C(84A)-C(85A)-C(86A) | 120.1(11) |
| C(84A)-C(85A)-H(85A) | 119.9     |
| C(86A)-C(85A)-H(85A) | 119.9     |
| C(87A)-C(86A)-C(85A) | 119.9(11) |
| C(87A)-C(86A)-H(86A) | 120.0     |
| C(85A)-C(86A)-H(86A) | 120.0     |
| C(86A)-C(87A)-C(88A) | 119.4(11) |
| C(86A)-C(87A)-H(87A) | 120.3     |
| C(88A)-C(87A)-H(87A) | 120.3     |
| C(83A)-C(88A)-C(87A) | 120.8(9)  |
| C(83A)-C(88A)-C(89A) | 119.6(9)  |
| C(87A)-C(88A)-C(89A) | 119.5(10) |
| C(90A)-C(89A)-C(88A) | 118.8(11) |
| C(90A)-C(89A)-H(89A) | 120.6     |
| C(88A)-C(89A)-H(89A) | 120.6     |
| C(89A)-C(90A)-C(81A) | 120.0(12) |
| C(89A)-C(90A)-C(91A) | 119.4(11) |
| C(81A)-C(90A)-C(91A) | 120.4(9)  |
| O(16A)-C(91A)-N(6A)  | 125.1(12) |
| O(16A)-C(91A)-C(90A) | 124.7(10) |
| N(6A)-C(91A)-C(90A)  | 110.0(10) |
| N(6A)-C(92A)-C(93A)  | 108.0(10) |
| N(6A)-C(92A)-C(94A)  | 113.7(10) |
| C(93A)-C(92A)-C(94A) | 110.6(10) |
| N(6A)-C(92A)-H(92A)  | 108.1     |
| C(93A)-C(92A)-H(92A) | 108.1     |
| C(94A)-C(92A)-H(92A) | 108.1     |
| O(18A)-C(93A)-O(17A) | 123.7(12) |
| O(18A)-C(93A)-C(92A) | 117.7(11) |
| O(17A)-C(93A)-C(92A) | 118.4(12) |
| C(96A)-C(94A)-C(95A) | 113.4(13) |
| C(96A)-C(94A)-C(92A) | 112.4(11) |
| C(95A)-C(94A)-C(92A) | 111.3(11) |
| C(96A)-C(94A)-H(94A) | 106.4     |

|                      |          |
|----------------------|----------|
| C(95A)-C(94A)-H(94A) | 106.4    |
| C(92A)-C(94A)-H(94A) | 106.4    |
| C(94A)-C(95A)-H(95D) | 109.5    |
| C(94A)-C(95A)-H(95E) | 109.5    |
| H(95D)-C(95A)-H(95E) | 109.5    |
| C(94A)-C(95A)-H(95F) | 109.5    |
| H(95D)-C(95A)-H(95F) | 109.5    |
| H(95E)-C(95A)-H(95F) | 109.5    |
| C(94A)-C(96A)-H(96D) | 109.5    |
| C(94A)-C(96A)-H(96E) | 109.5    |
| H(96D)-C(96A)-H(96E) | 109.5    |
| C(94A)-C(96A)-H(96F) | 109.5    |
| H(96D)-C(96A)-H(96F) | 109.5    |
| H(96E)-C(96A)-H(96F) | 109.5    |
| CI(3)-C(98)-CI(1)    | 111.2    |
| CI(3)-C(98)-CI(2)    | 111.2    |
| CI(1)-C(98)-CI(2)    | 111.2    |
| CI(3)-C(98)-H(98)    | 107.7    |
| CI(1)-C(98)-H(98)    | 107.7    |
| CI(2)-C(98)-H(98)    | 107.7    |
| CI(1A)-C(98A)-CI(2A) | 110.9(8) |
| CI(1A)-C(98A)-CI(3A) | 110.5(9) |
| CI(2A)-C(98A)-CI(3A) | 108.8(8) |
| CI(1A)-C(98A)-H(98A) | 108.9    |
| CI(2A)-C(98A)-H(98A) | 108.9    |
| CI(3A)-C(98A)-H(98A) | 108.9    |
| CI(4)-C(99)-CI(5)    | 110.0(7) |
| CI(4)-C(99)-CI(6)    | 110.2(9) |
| CI(5)-C(99)-CI(6)    | 101.9(9) |
| CI(4)-C(99)-H(99)    | 111.5    |
| CI(5)-C(99)-H(99)    | 111.5    |
| CI(6)-C(99)-H(99)    | 111.5    |
| CI(4A)-C(99A)-CI(5A) | 114.1(9) |
| CI(4A)-C(99A)-CI(6A) | 107.5(9) |
| CI(5A)-C(99A)-CI(6A) | 109.0(8) |
| CI(4A)-C(99A)-H(99A) | 108.7    |



|                      |           |
|----------------------|-----------|
| Cl(5A)-C(99A)-H(99A) | 108.7     |
| Cl(6A)-C(99A)-H(99A) | 108.7     |
| C(101)-C(100)-H(10A) | 109.5     |
| C(101)-C(100)-H(10B) | 109.5     |
| H(10A)-C(100)-H(10B) | 109.5     |
| C(101)-C(100)-H(10C) | 109.5     |
| H(10A)-C(100)-H(10C) | 109.5     |
| H(10B)-C(100)-H(10C) | 109.5     |
| O(19)-C(101)-C(100)  | 108.8     |
| O(19)-C(101)-H(10D)  | 109.9     |
| C(100)-C(101)-H(10D) | 109.9     |
| O(19)-C(101)-H(10E)  | 109.9     |
| C(100)-C(101)-H(10E) | 109.9     |
| H(10D)-C(101)-H(10E) | 108.3     |
| C(102)-O(19)-C(101)  | 113.5     |
| O(19)-C(102)-C(103)  | 108.8     |
| O(19)-C(102)-H(10F)  | 109.9     |
| C(103)-C(102)-H(10F) | 109.9     |
| O(19)-C(102)-H(10G)  | 109.9     |
| C(103)-C(102)-H(10G) | 109.9     |
| H(10F)-C(102)-H(10G) | 108.3     |
| C(102)-C(103)-H(10H) | 109.5     |
| C(102)-C(103)-H(10I) | 109.5     |
| H(10H)-C(103)-H(10I) | 109.5     |
| C(102)-C(103)-H(10J) | 109.5     |
| H(10H)-C(103)-H(10J) | 109.5     |
| H(10I)-C(103)-H(10J) | 109.5     |
| Cl(7)-C(104)-Cl(8)   | 109.2(15) |
| Cl(7)-C(104)-Cl(9)   | 113.8(15) |
| Cl(8)-C(104)-Cl(9)   | 108.3(14) |
| Cl(7)-C(104)-H(104)  | 108.5     |
| Cl(8)-C(104)-H(104)  | 108.5     |
| Cl(9)-C(104)-H(104)  | 108.5     |

---

Symmetry transformations used to generate equivalent atoms:

Table 4. Anisotropic displacement parameters ( $\text{\AA}^2 \times 10^3$ ) for 4468ds. The anisotropic displacement factor exponent takes the form:  $-2p^2[h^2 a^{*2}U^{11} + \dots + 2hka^*b^*U^{12}]$

|       | U <sup>11</sup> | U <sup>22</sup> | U <sup>33</sup> | U <sup>23</sup> | U <sup>13</sup> | U <sup>12</sup> |
|-------|-----------------|-----------------|-----------------|-----------------|-----------------|-----------------|
| I(1)  | 21(1)           | 18(1)           | 22(1)           | 1(1)            | -1(1)           | -2(1)           |
| I(2)  | 18(1)           | 21(1)           | 19(1)           | -2(1)           | -1(1)           | 2(1)            |
| I(3)  | 18(1)           | 17(1)           | 24(1)           | 1(1)            | -1(1)           | 0(1)            |
| I(4)  | 27(1)           | 20(1)           | 21(1)           | -1(1)           | 2(1)            | -5(1)           |
| I(5)  | 19(1)           | 25(1)           | 25(1)           | 2(1)            | 5(1)            | -1(1)           |
| I(6)  | 34(1)           | 43(1)           | 21(1)           | 1(1)            | 1(1)            | -20(1)          |
| O(1)  | 31(2)           | 24(2)           | 28(2)           | -3(1)           | -4(1)           | -3(1)           |
| O(2)  | 25(2)           | 21(2)           | 26(2)           | 4(1)            | -4(1)           | -3(1)           |
| O(3)  | 35(2)           | 21(2)           | 31(2)           | 2(1)            | -10(2)          | -1(2)           |
| O(4)  | 40(2)           | 33(2)           | 40(2)           | 2(2)            | -18(2)          | 4(2)            |
| O(5)  | 35(2)           | 23(2)           | 24(2)           | 2(1)            | -7(1)           | -3(1)           |
| O(6)  | 44(2)           | 21(2)           | 40(2)           | 0(2)            | -19(2)          | 0(2)            |
| O(7)  | 39(2)           | 20(2)           | 30(2)           | 1(1)            | 2(2)            | 1(1)            |
| O(8)  | 26(2)           | 23(2)           | 26(2)           | -3(1)           | -4(1)           | 1(1)            |
| O(9)  | 45(2)           | 16(2)           | 41(2)           | 0(2)            | -20(2)          | 3(2)            |
| O(10) | 26(2)           | 25(2)           | 28(2)           | -5(1)           | -2(1)           | -1(1)           |
| O(11) | 26(2)           | 20(2)           | 31(2)           | 0(1)            | 2(1)            | 0(1)            |
| O(12) | 34(2)           | 22(2)           | 32(2)           | -1(1)           | -2(2)           | -4(1)           |
| O(13) | 45(2)           | 44(2)           | 37(2)           | 11(2)           | 2(2)            | 6(2)            |
| O(14) | 25(2)           | 44(2)           | 28(2)           | 1(2)            | 2(1)            | -4(2)           |
| O(15) | 29(2)           | 36(2)           | 30(2)           | 4(2)            | -2(2)           | -7(2)           |
| N(1)  | 24(2)           | 19(2)           | 23(2)           | 1(1)            | -7(2)           | 0(1)            |
| N(2)  | 24(2)           | 25(2)           | 23(2)           | 3(2)            | -5(2)           | 0(2)            |
| N(3)  | 23(2)           | 16(2)           | 27(2)           | -3(2)           | -1(2)           | 1(1)            |
| N(4)  | 24(2)           | 20(2)           | 23(2)           | -3(1)           | 2(2)            | -1(1)           |
| N(5)  | 28(2)           | 34(2)           | 23(2)           | 3(2)            | 6(2)            | 3(2)            |
| C(1)  | 22(2)           | 20(2)           | 26(2)           | 1(2)            | 4(2)            | -1(2)           |
| C(2)  | 24(2)           | 23(2)           | 25(2)           | 2(2)            | 3(2)            | -1(2)           |
| C(3)  | 18(2)           | 23(2)           | 34(2)           | 2(2)            | 4(2)            | -2(2)           |
| C(4)  | 27(2)           | 26(2)           | 31(2)           | 5(2)            | 4(2)            | 3(2)            |
| C(5)  | 28(2)           | 30(3)           | 41(3)           | 13(2)           | 10(2)           | 6(2)            |

|        |         |        |        |        |        |        |
|--------|---------|--------|--------|--------|--------|--------|
| C(6)   | 26(2)   | 19(2)  | 41(3)  | 3(2)   | 11(2)  | 2(2)   |
| C(7)   | 21(2)   | 22(2)  | 36(2)  | 1(2)   | 7(2)   | 1(2)   |
| C(8)   | 19(2)   | 21(2)  | 33(2)  | 1(2)   | 8(2)   | 1(2)   |
| C(9)   | 21(2)   | 21(2)  | 31(2)  | -2(2)  | 5(2)   | -2(2)  |
| C(10)  | 20(2)   | 19(2)  | 27(2)  | 1(2)   | 1(2)   | -3(2)  |
| C(11)  | 20(2)   | 21(2)  | 28(2)  | -1(2)  | 2(2)   | -3(2)  |
| C(12)  | 21(2)   | 19(2)  | 22(2)  | 3(2)   | -3(2)  | -2(2)  |
| C(13)  | 20(2)   | 20(2)  | 27(2)  | -1(2)  | -1(2)  | -3(2)  |
| C(14)  | 22(2)   | 19(2)  | 31(2)  | 0(2)   | 0(2)   | -3(2)  |
| C(15)  | 24(2)   | 35(3)  | 35(3)  | 4(2)   | 6(2)   | 1(2)   |
| C(16)  | 29(2)   | 28(2)  | 32(3)  | 2(2)   | -6(2)  | -2(2)  |
| C(17)  | 20(2)   | 29(2)  | 18(2)  | -3(2)  | -2(2)  | -2(2)  |
| C(18)  | 25(2)   | 31(2)  | 20(2)  | -1(2)  | 1(2)   | -2(2)  |
| C(19)  | 32(2)   | 30(3)  | 22(2)  | 0(2)   | 2(2)   | -9(2)  |
| C(20)  | 45(3)   | 31(3)  | 31(3)  | 4(2)   | -6(2)  | -11(2) |
| C(21)  | 62(4)   | 39(3)  | 33(3)  | 0(2)   | -11(3) | -21(3) |
| C(22)  | 53(4)   | 47(4)  | 38(3)  | 3(3)   | -18(3) | -23(3) |
| C(23)  | 38(3)   | 47(3)  | 32(3)  | 4(2)   | -12(2) | -14(3) |
| C(24)  | 31(2)   | 39(3)  | 24(2)  | -2(2)  | -2(2)  | -8(2)  |
| C(25)  | 24(2)   | 33(3)  | 28(2)  | 3(2)   | -5(2)  | -1(2)  |
| C(26)  | 25(2)   | 30(2)  | 24(2)  | -1(2)  | 0(2)   | 1(2)   |
| C(27)  | 28(2)   | 33(3)  | 22(2)  | 1(2)   | -5(2)  | -2(2)  |
| C(28)  | 28(2)   | 23(2)  | 22(2)  | 2(2)   | -3(2)  | -2(2)  |
| C(29)  | 23(2)   | 25(2)  | 24(2)  | -2(2)  | -2(2)  | 2(2)   |
| C(30)  | 69(4)   | 42(3)  | 38(3)  | -10(3) | 20(3)  | -21(3) |
| C(31)  | 56(6)   | 36(5)  | 39(9)  | 4(4)   | 13(6)  | -15(4) |
| C(32)  | 97(8)   | 51(6)  | 74(7)  | -4(5)  | 62(6)  | -5(6)  |
| C(31A) | 48(10)  | 42(10) | 35(13) | 4(9)   | 5(10)  | 0(9)   |
| C(32A) | 106(13) | 78(12) | 84(12) | -5(11) | 57(11) | -7(12) |
| C(33)  | 16(2)   | 23(2)  | 23(2)  | 3(2)   | 4(2)   | 2(2)   |
| C(34)  | 16(2)   | 23(2)  | 27(2)  | 2(2)   | 3(2)   | 2(2)   |
| C(35)  | 19(2)   | 27(2)  | 27(2)  | 1(2)   | 1(2)   | 5(2)   |
| C(36)  | 27(2)   | 34(3)  | 36(3)  | -3(2)  | -5(2)  | 5(2)   |
| C(37)  | 37(3)   | 47(3)  | 35(3)  | 1(3)   | -13(2) | 8(3)   |
| C(38)  | 38(3)   | 44(3)  | 38(3)  | 7(2)   | -9(2)  | 12(2)  |
| C(39)  | 31(3)   | 33(3)  | 37(3)  | 6(2)   | -5(2)  | 9(2)   |

|       |        |       |       |        |        |       |
|-------|--------|-------|-------|--------|--------|-------|
| C(40) | 22(2)  | 31(2) | 25(2) | 2(2)   | 2(2)   | 7(2)  |
| C(41) | 24(2)  | 27(2) | 29(2) | 3(2)   | 5(2)   | 6(2)  |
| C(42) | 17(2)  | 22(2) | 25(2) | 2(2)   | 4(2)   | 4(2)  |
| C(43) | 19(2)  | 20(2) | 27(2) | 2(2)   | 3(2)   | 2(2)  |
| C(44) | 26(2)  | 19(2) | 24(2) | 0(2)   | -1(2)  | 4(2)  |
| C(45) | 21(2)  | 23(2) | 25(2) | -1(2)  | -2(2)  | 4(2)  |
| C(46) | 49(3)  | 36(3) | 23(2) | 1(2)   | 2(2)   | 24(2) |
| C(47) | 45(3)  | 93(6) | 36(3) | 27(3)  | 21(3)  | 33(4) |
| C(48) | 102(6) | 46(4) | 44(4) | -19(3) | -18(4) | 34(4) |
| C(49) | 21(2)  | 22(2) | 25(2) | -2(2)  | 5(2)   | -3(2) |
| C(50) | 23(2)  | 26(2) | 29(2) | -5(2)  | 9(2)   | -3(2) |
| C(51) | 21(2)  | 24(2) | 29(2) | 0(2)   | 11(2)  | 2(2)  |
| C(52) | 27(2)  | 23(2) | 35(3) | -1(2)  | 11(2)  | 1(2)  |
| C(53) | 28(2)  | 22(2) | 46(3) | 6(2)   | 10(2)  | 2(2)  |
| C(54) | 32(3)  | 30(3) | 38(3) | 8(2)   | 2(2)   | 4(2)  |
| C(55) | 30(3)  | 32(3) | 36(3) | 4(2)   | -3(2)  | 0(2)  |
| C(56) | 19(2)  | 25(2) | 31(2) | 1(2)   | 5(2)   | 2(2)  |
| C(57) | 20(2)  | 28(2) | 28(2) | -2(2)  | 4(2)   | 0(2)  |
| C(58) | 18(2)  | 22(2) | 28(2) | -2(2)  | 5(2)   | -2(2) |
| C(59) | 19(2)  | 20(2) | 24(2) | 0(2)   | 4(2)   | 1(2)  |
| C(60) | 23(2)  | 18(2) | 24(2) | -1(2)  | 1(2)   | 1(2)  |
| C(61) | 21(2)  | 25(2) | 24(2) | -1(2)  | 2(2)   | -2(2) |
| C(62) | 22(2)  | 22(2) | 44(3) | 2(2)   | -1(2)  | -2(2) |
| C(63) | 33(3)  | 32(3) | 52(3) | 10(2)  | 20(2)  | 6(2)  |
| C(64) | 37(3)  | 27(3) | 60(4) | -1(2)  | -5(3)  | -7(2) |
| C(65) | 19(2)  | 23(2) | 34(2) | 2(2)   | 11(2)  | 1(2)  |
| C(66) | 20(2)  | 26(2) | 32(3) | 3(2)   | 8(2)   | 2(2)  |
| C(67) | 24(2)  | 25(2) | 40(3) | -2(2)  | 15(2)  | 2(2)  |
| C(68) | 24(2)  | 32(3) | 43(3) | -4(2)  | 9(2)   | 0(2)  |
| C(69) | 26(2)  | 34(3) | 54(3) | -8(2)  | 16(2)  | -1(2) |
| C(70) | 38(3)  | 24(2) | 58(3) | 1(2)   | 28(3)  | 0(2)  |
| C(71) | 39(3)  | 26(3) | 49(3) | 5(2)   | 22(3)  | 4(2)  |
| C(72) | 30(2)  | 29(2) | 38(3) | 2(2)   | 18(2)  | 4(2)  |
| C(73) | 39(3)  | 30(3) | 40(3) | 9(2)   | 18(2)  | 8(2)  |
| C(74) | 31(2)  | 28(2) | 32(3) | 4(2)   | 14(2)  | 5(2)  |
| C(75) | 33(3)  | 34(3) | 32(3) | 7(2)   | 12(2)  | 4(2)  |

|        |       |       |       |        |        |       |
|--------|-------|-------|-------|--------|--------|-------|
| C(76)  | 28(2) | 41(3) | 25(2) | 3(2)   | 5(2)   | 0(2)  |
| C(77)  | 21(2) | 41(3) | 23(2) | 1(2)   | 6(2)   | -1(2) |
| C(78)  | 45(3) | 46(3) | 26(2) | 2(2)   | 13(2)  | -5(3) |
| C(79)  | 64(4) | 72(5) | 33(3) | 4(3)   | 5(3)   | -5(4) |
| C(80)  | 39(3) | 48(3) | 51(4) | -9(3)  | 25(3)  | -6(3) |
| O(16)  | 45(5) | 22(4) | 30(3) | -6(3)  | -3(4)  | -2(3) |
| O(17)  | 33(5) | 24(3) | 26(3) | 0(2)   | 2(3)   | -7(4) |
| O(18)  | 39(5) | 24(3) | 29(4) | 3(3)   | -3(3)  | -5(3) |
| N(6)   | 31(3) | 23(3) | 23(2) | -3(2)  | 3(3)   | -7(3) |
| C(81)  | 27(3) | 26(3) | 24(3) | -8(3)  | 5(2)   | -6(3) |
| C(82)  | 29(3) | 28(3) | 29(3) | -6(3)  | 1(3)   | -4(3) |
| C(83)  | 33(3) | 32(3) | 41(3) | -8(3)  | -4(3)  | -1(3) |
| C(84)  | 42(4) | 41(4) | 55(4) | -11(3) | -14(3) | 2(3)  |
| C(85)  | 46(3) | 45(4) | 62(4) | -14(3) | -21(3) | 3(3)  |
| C(86)  | 45(3) | 48(4) | 63(4) | -21(3) | -20(3) | -1(3) |
| C(87)  | 41(3) | 42(3) | 49(3) | -17(3) | -13(3) | -3(3) |
| C(88)  | 35(3) | 33(3) | 39(3) | -16(2) | -4(3)  | 0(3)  |
| C(89)  | 33(3) | 29(3) | 32(3) | -12(3) | 1(3)   | -5(3) |
| C(90)  | 31(3) | 26(3) | 25(2) | -9(2)  | 4(2)   | -5(2) |
| C(91)  | 30(3) | 23(3) | 21(2) | -7(3)  | 5(3)   | -6(3) |
| C(92)  | 36(4) | 22(3) | 24(2) | 3(2)   | 3(3)   | -5(3) |
| C(93)  | 34(4) | 24(3) | 24(2) | 1(2)   | 1(3)   | -7(3) |
| C(94)  | 41(4) | 25(3) | 29(3) | 4(3)   | 6(3)   | 2(3)  |
| C(95)  | 55(6) | 39(5) | 39(5) | 1(4)   | 5(6)   | 14(5) |
| C(96)  | 51(6) | 43(5) | 50(7) | -1(6)  | 22(5)  | 1(5)  |
| O(16A) | 40(6) | 23(5) | 28(4) | -5(4)  | -3(5)  | 0(4)  |
| O(17A) | 34(6) | 24(4) | 24(3) | -1(3)  | 1(4)   | -7(4) |
| O(18A) | 34(6) | 22(5) | 19(4) | -8(3)  | 4(4)   | -7(5) |
| N(6A)  | 32(4) | 20(3) | 21(3) | -1(3)  | 2(3)   | -8(3) |
| C(81A) | 27(3) | 27(4) | 24(3) | -9(3)  | 4(3)   | -4(3) |
| C(82A) | 29(3) | 30(3) | 30(3) | -8(3)  | 3(3)   | -2(3) |
| C(83A) | 31(3) | 35(3) | 35(3) | -11(3) | -1(3)  | -3(3) |
| C(84A) | 38(3) | 39(3) | 47(3) | -11(3) | -8(3)  | 1(3)  |
| C(85A) | 41(3) | 47(4) | 54(4) | -14(3) | -13(3) | 0(3)  |
| C(86A) | 40(4) | 47(4) | 51(4) | -17(4) | -9(4)  | -3(4) |
| C(87A) | 39(4) | 40(4) | 42(4) | -16(3) | -6(4)  | -5(4) |

|        |        |        |         |        |        |        |
|--------|--------|--------|---------|--------|--------|--------|
| C(88A) | 33(3)  | 35(3)  | 36(3)   | -16(3) | -3(3)  | -5(3)  |
| C(89A) | 31(4)  | 32(4)  | 30(4)   | -11(3) | 4(3)   | -6(3)  |
| C(90A) | 30(3)  | 26(3)  | 25(3)   | -8(3)  | 5(3)   | -7(3)  |
| C(91A) | 33(4)  | 24(4)  | 23(3)   | -4(3)  | 4(3)   | -7(3)  |
| C(92A) | 35(4)  | 22(3)  | 23(3)   | 1(3)   | 2(3)   | -5(3)  |
| C(93A) | 35(4)  | 22(3)  | 24(3)   | -1(3)  | 3(3)   | -6(3)  |
| C(94A) | 41(5)  | 26(3)  | 27(3)   | 0(3)   | 7(4)   | -1(4)  |
| C(95A) | 46(7)  | 39(6)  | 37(6)   | 9(5)   | 9(7)   | 7(7)   |
| C(96A) | 43(6)  | 32(6)  | 23(6)   | -6(5)  | 11(5)  | 1(5)   |
| CI(1)  | 60(2)  | 72(2)  | 54(2)   | 1(2)   | -3(2)  | 2(2)   |
| CI(2)  | 68(2)  | 71(2)  | 77(3)   | -21(2) | -4(2)  | -11(2) |
| CI(3)  | 71(3)  | 56(2)  | 96(3)   | 5(2)   | 8(2)   | -2(2)  |
| C(98)  | 69(5)  | 65(5)  | 69(5)   | -5(5)  | -3(5)  | 0(5)   |
| CI(1A) | 69(2)  | 58(2)  | 58(2)   | -2(2)  | 18(2)  | 3(2)   |
| CI(2A) | 62(2)  | 59(2)  | 65(2)   | -12(2) | -4(2)  | -1(2)  |
| CI(3A) | 75(3)  | 58(2)  | 61(2)   | -6(2)  | 7(2)   | -19(2) |
| C(98A) | 66(5)  | 62(5)  | 66(5)   | -6(4)  | 1(4)   | -8(4)  |
| CI(4)  | 65(2)  | 88(3)  | 65(2)   | 20(2)  | 22(2)  | 21(2)  |
| CI(5)  | 93(3)  | 149(5) | 76(3)   | 48(4)  | 41(3)  | 60(3)  |
| CI(6)  | 81(3)  | 108(4) | 84(3)   | 18(3)  | 20(3)  | 16(3)  |
| C(99)  | 94(6)  | 88(6)  | 53(5)   | 35(5)  | 49(5)  | 48(6)  |
| CI(4A) | 157(6) | 77(3)  | 71(4)   | -20(3) | 9(4)   | 27(4)  |
| CI(5A) | 57(2)  | 90(3)  | 61(2)   | 20(2)  | 13(2)  | 9(2)   |
| CI(6A) | 52(2)  | 65(3)  | 42(2)   | -4(2)  | 11(1)  | 1(2)   |
| C(99A) | 70(6)  | 69(6)  | 57(6)   | 11(5)  | 7(5)   | 21(6)  |
| C(100) | 111(8) | 59(6)  | 78(7)   | -5(5)  | -7(6)  | -4(6)  |
| C(101) | 99(6)  | 68(6)  | 61(5)   | 18(5)  | 5(5)   | -26(5) |
| O(19)  | 90(4)  | 64(4)  | 65(4)   | -1(3)  | 5(3)   | -15(4) |
| C(102) | 86(5)  | 75(5)  | 76(5)   | -10(4) | -5(4)  | -8(4)  |
| C(103) | 100(9) | 105(8) | 118(10) | -16(8) | -27(8) | 7(8)   |
| CI(7)  | 80(5)  | 70(5)  | 52(4)   | -13(4) | 10(4)  | -4(4)  |
| CI(8)  | 77(6)  | 59(4)  | 101(6)  | 5(5)   | -41(5) | 9(4)   |
| CI(9)  | 90(5)  | 48(5)  | 86(5)   | 2(4)   | 22(4)  | -34(4) |
| C(104) | 86(5)  | 64(5)  | 72(5)   | -3(5)  | -3(5)  | -11(5) |

Table 5. Hydrogen coordinates ( $\times 10^4$ ) and isotropic displacement parameters ( $\text{\AA}^2 \times 10^3$ ) for 4468ds.

|        | x         | y         | z         | U(eq) |
|--------|-----------|-----------|-----------|-------|
| H(2)   | 7461      | 2484      | 2080      | 29    |
| H(4)   | 7872      | 1458      | 2576      | 34    |
| H(5)   | 7816      | 465       | 2329      | 39    |
| H(6)   | 7108      | 83        | 991       | 34    |
| H(7)   | 6498      | 701       | -129      | 31    |
| H(9)   | 6154      | 1726      | -682      | 29    |
| H(12)  | 5713      | 3861      | -1483     | 25    |
| H(14)  | 4340      | 3367      | -1036     | 29    |
| H(15A) | 4116      | 4408      | -53       | 46    |
| H(15B) | 4323      | 3775      | 374       | 46    |
| H(15C) | 3371      | 3898      | -210      | 46    |
| H(16A) | 4241      | 3913      | -2336     | 45    |
| H(16B) | 4107      | 4504      | -1798     | 45    |
| H(16C) | 3329      | 4012      | -1864     | 45    |
| H(18)  | 8904      | 6679      | 3290      | 30    |
| H(20)  | 9732      | 7516      | 4075      | 43    |
| H(21)  | 10888     | 7861      | 5104      | 55    |
| H(22)  | 11833     | 7207      | 5964      | 57    |
| H(23)  | 11657     | 6214      | 5789      | 48    |
| H(25)  | 10793     | 5370      | 5059      | 35    |
| H(28)  | 8755      | 3811      | 3580      | 30    |
| H(30A) | 8045      | 4117      | 4827      | 58    |
| H(30B) | 7210(190) | 4200(120) | 3790(190) | 58    |
| H(31A) | 7695      | 3170      | 4286      | 65    |
| H(31B) | 6898      | 3429      | 4814      | 65    |
| H(31C) | 6777      | 3414      | 3749      | 65    |
| H(32A) | 7229      | 4919      | 4232      | 106   |
| H(32B) | 6496      | 4488      | 3716      | 106   |
| H(32C) | 6617      | 4503      | 4780      | 106   |
| H(31D) | 7254      | 3257      | 3877      | 63    |

|        |       |      |       |     |
|--------|-------|------|-------|-----|
| H(31E) | 7620  | 3305 | 4909  | 63  |
| H(31F) | 6624  | 3544 | 4561  | 63  |
| H(32D) | 8004  | 4855 | 4654  | 129 |
| H(32E) | 7126  | 4607 | 5071  | 129 |
| H(32F) | 8122  | 4368 | 5419  | 129 |
| H(34)  | 4795  | 5568 | -2071 | 26  |
| H(36)  | 3951  | 5725 | -3583 | 39  |
| H(37)  | 3525  | 6333 | -4783 | 49  |
| H(38)  | 3816  | 7347 | -4685 | 49  |
| H(39)  | 4497  | 7747 | -3378 | 41  |
| H(41)  | 5238  | 7610 | -1818 | 32  |
| H(44)  | 7260  | 7071 | 945   | 28  |
| H(46)  | 5744  | 7353 | 1352  | 43  |
| H(47A) | 5287  | 6396 | 1747  | 85  |
| H(47B) | 5142  | 6879 | 2486  | 85  |
| H(47C) | 5990  | 6438 | 2628  | 85  |
| H(48A) | 7056  | 7786 | 2064  | 99  |
| H(48B) | 7196  | 7253 | 2752  | 99  |
| H(48C) | 6338  | 7681 | 2773  | 99  |
| H(50)  | 8899  | 3084 | 10320 | 31  |
| H(52)  | 9216  | 2119 | 11071 | 33  |
| H(53)  | 9801  | 1589 | 12305 | 38  |
| H(54)  | 10567 | 2062 | 13557 | 40  |
| H(55)  | 10727 | 3071 | 13565 | 40  |
| H(57)  | 10479 | 4031 | 12805 | 30  |
| H(60)  | 9220  | 5863 | 11276 | 26  |
| H(62)  | 10830 | 5703 | 10970 | 36  |
| H(63A) | 10186 | 6102 | 9230  | 57  |
| H(63B) | 10518 | 5447 | 9453  | 57  |
| H(63C) | 11231 | 5976 | 9586  | 57  |
| H(64A) | 11101 | 6699 | 10845 | 63  |
| H(64B) | 10314 | 6608 | 11487 | 63  |
| H(64C) | 10055 | 6815 | 10481 | 63  |
| H(66)  | 8604  | 7438 | 9874  | 31  |
| H(68)  | 8973  | 8362 | 10729 | 39  |
| H(69)  | 8915  | 9371 | 10835 | 45  |



|        |      |      |      |    |
|--------|------|------|------|----|
| H(70)  | 8233 | 9928 | 9645 | 46 |
| H(71)  | 7592 | 9477 | 8351 | 44 |
| H(73)  | 7150 | 8566 | 7519 | 43 |
| H(76)  | 6079 | 6608 | 6315 | 37 |
| H(78)  | 7456 | 6905 | 5582 | 46 |
| H(79A) | 6992 | 6372 | 4292 | 84 |
| H(79B) | 6122 | 6605 | 4738 | 84 |
| H(79C) | 6425 | 5935 | 4851 | 84 |
| H(80A) | 7936 | 5696 | 5733 | 67 |
| H(80B) | 8461 | 6195 | 6329 | 67 |
| H(80C) | 8490 | 6194 | 5273 | 67 |
| H(82)  | 4879 | 5113 | 5547 | 35 |
| H(84)  | 3410 | 5231 | 4622 | 57 |
| H(85)  | 2055 | 4836 | 3918 | 63 |
| H(86)  | 1797 | 3827 | 3966 | 64 |
| H(87)  | 2893 | 3213 | 4719 | 54 |
| H(89)  | 4386 | 3076 | 5581 | 38 |
| H(92)  | 7009 | 3061 | 7964 | 32 |
| H(94)  | 7803 | 2968 | 6611 | 38 |
| H(95A) | 9097 | 2539 | 7355 | 66 |
| H(95B) | 8264 | 2421 | 7932 | 66 |
| H(95C) | 8999 | 2918 | 8230 | 66 |
| H(96A) | 9130 | 3500 | 6500 | 70 |
| H(96B) | 9011 | 3844 | 7402 | 70 |
| H(96C) | 8307 | 3954 | 6537 | 70 |
| H(82A) | 4764 | 4900 | 5792 | 35 |
| H(84A) | 3147 | 4919 | 5150 | 51 |
| H(85A) | 1777 | 4443 | 4724 | 58 |
| H(86A) | 1718 | 3416 | 4702 | 56 |
| H(87A) | 3021 | 2874 | 5192 | 49 |
| H(89A) | 4644 | 2839 | 5766 | 37 |
| H(92A) | 7330 | 2973 | 7965 | 32 |
| H(94A) | 8083 | 2854 | 6655 | 37 |
| H(95D) | 9491 | 2589 | 7337 | 61 |
| H(95E) | 8753 | 2463 | 8019 | 61 |
| H(95F) | 9398 | 3027 | 8149 | 61 |

|        |      |      |      |     |
|--------|------|------|------|-----|
| H(96D) | 9233 | 3479 | 6297 | 48  |
| H(96E) | 9049 | 3907 | 7097 | 48  |
| H(96F) | 8286 | 3826 | 6270 | 48  |
| H(98)  | 5817 | 4732 | 2025 | 82  |
| H(98A) | 3857 | 4944 | 2511 | 78  |
| H(99)  | 3355 | 7005 | 2860 | 90  |
| H(99A) | 1386 | 5912 | 2582 | 79  |
| H(10A) | -722 | 5587 | 7216 | 126 |
| H(10B) | 28   | 5432 | 8027 | 126 |
| H(10C) | -772 | 4977 | 7728 | 126 |
| H(10D) | -139 | 4898 | 6306 | 92  |
| H(10E) | 727  | 5262 | 6746 | 92  |
| H(10F) | 1703 | 4424 | 6581 | 96  |
| H(10G) | 837  | 4060 | 6141 | 96  |
| H(10H) | 1056 | 3397 | 7398 | 166 |
| H(10I) | 1992 | 3731 | 7705 | 166 |
| H(10J) | 1878 | 3379 | 6786 | 166 |
| H(104) | 808  | 4290 | 5806 | 90  |

---

Table 6. Torsion angles [°] for 4468ds.

---

|                        |           |
|------------------------|-----------|
| C(10)-C(1)-C(2)-C(3)   | -1.3(7)   |
| I(1)-C(1)-C(2)-C(3)    | 178.4(3)  |
| C(1)-C(2)-C(3)-C(4)    | -179.7(4) |
| C(1)-C(2)-C(3)-C(8)    | 0.4(7)    |
| C(8)-C(3)-C(4)-C(5)    | -2.4(7)   |
| C(2)-C(3)-C(4)-C(5)    | 177.7(5)  |
| C(3)-C(4)-C(5)-C(6)    | 0.2(8)    |
| C(4)-C(5)-C(6)-C(7)    | 1.4(8)    |
| C(5)-C(6)-C(7)-C(8)    | -0.8(7)   |
| C(4)-C(3)-C(8)-C(9)    | -179.5(4) |
| C(2)-C(3)-C(8)-C(9)    | 0.5(6)    |
| C(4)-C(3)-C(8)-C(7)    | 2.9(6)    |
| C(2)-C(3)-C(8)-C(7)    | -177.2(4) |
| C(6)-C(7)-C(8)-C(9)    | -178.9(4) |
| C(6)-C(7)-C(8)-C(3)    | -1.3(7)   |
| C(3)-C(8)-C(9)-C(10)   | -0.5(7)   |
| C(7)-C(8)-C(9)-C(10)   | 177.0(4)  |
| C(8)-C(9)-C(10)-C(1)   | -0.3(7)   |
| C(8)-C(9)-C(10)-C(11)  | -178.9(4) |
| C(2)-C(1)-C(10)-C(9)   | 1.3(7)    |
| I(1)-C(1)-C(10)-C(9)   | -178.5(4) |
| C(2)-C(1)-C(10)-C(11)  | 179.9(4)  |
| I(1)-C(1)-C(10)-C(11)  | 0.1(5)    |
| C(12)-N(1)-C(11)-O(1)  | 3.2(7)    |
| I(1)-N(1)-C(11)-O(1)   | -169.9(4) |
| C(12)-N(1)-C(11)-C(10) | -175.2(4) |
| I(1)-N(1)-C(11)-C(10)  | 11.7(5)   |
| C(9)-C(10)-C(11)-O(1)  | -7.6(7)   |
| C(1)-C(10)-C(11)-O(1)  | 173.8(5)  |
| C(9)-C(10)-C(11)-N(1)  | 170.8(4)  |
| C(1)-C(10)-C(11)-N(1)  | -7.8(6)   |
| C(11)-N(1)-C(12)-C(13) | -163.3(4) |
| I(1)-N(1)-C(12)-C(13)  | 9.2(5)    |
| C(11)-N(1)-C(12)-C(14) | 73.2(5)   |

|                         |           |
|-------------------------|-----------|
| I(1)-N(1)-C(12)-C(14)   | -114.3(4) |
| I(3)-O(2)-C(13)-O(3)    | 0.2(5)    |
| I(3)-O(2)-C(13)-C(12)   | 178.2(3)  |
| N(1)-C(12)-C(13)-O(3)   | -10.2(6)  |
| C(14)-C(12)-C(13)-O(3)  | 112.6(5)  |
| N(1)-C(12)-C(13)-O(2)   | 171.8(4)  |
| C(14)-C(12)-C(13)-O(2)  | -65.4(5)  |
| N(1)-C(12)-C(14)-C(15)  | 75.9(5)   |
| C(13)-C(12)-C(14)-C(15) | -47.2(5)  |
| N(1)-C(12)-C(14)-C(16)  | -156.7(4) |
| C(13)-C(12)-C(14)-C(16) | 80.2(5)   |
| C(26)-C(17)-C(18)-C(19) | -2.1(7)   |
| I(2)-C(17)-C(18)-C(19)  | 178.9(3)  |
| C(17)-C(18)-C(19)-C(24) | 1.9(7)    |
| C(17)-C(18)-C(19)-C(20) | -176.5(5) |
| C(24)-C(19)-C(20)-C(21) | 1.3(9)    |
| C(18)-C(19)-C(20)-C(21) | 179.7(6)  |
| C(19)-C(20)-C(21)-C(22) | -0.7(10)  |
| C(20)-C(21)-C(22)-C(23) | 0.4(11)   |
| C(21)-C(22)-C(23)-C(24) | -0.7(11)  |
| C(20)-C(19)-C(24)-C(25) | 177.8(5)  |
| C(18)-C(19)-C(24)-C(25) | -0.6(8)   |
| C(20)-C(19)-C(24)-C(23) | -1.5(8)   |
| C(18)-C(19)-C(24)-C(23) | -179.9(5) |
| C(22)-C(23)-C(24)-C(25) | -178.0(6) |
| C(22)-C(23)-C(24)-C(19) | 1.3(9)    |
| C(19)-C(24)-C(25)-C(26) | -0.5(8)   |
| C(23)-C(24)-C(25)-C(26) | 178.8(5)  |
| C(24)-C(25)-C(26)-C(17) | 0.4(7)    |
| C(24)-C(25)-C(26)-C(27) | -174.1(5) |
| C(18)-C(17)-C(26)-C(25) | 1.0(7)    |
| I(2)-C(17)-C(26)-C(25)  | -179.8(4) |
| C(18)-C(17)-C(26)-C(27) | 175.6(5)  |
| I(2)-C(17)-C(26)-C(27)  | -5.2(5)   |
| C(28)-N(2)-C(27)-O(4)   | 9.7(8)    |
| I(2)-N(2)-C(27)-O(4)    | -174.6(4) |

|                          |            |
|--------------------------|------------|
| C(28)-N(2)-C(27)-C(26)   | -167.4(4)  |
| I(2)-N(2)-C(27)-C(26)    | 8.2(6)     |
| C(25)-C(26)-C(27)-O(4)   | -4.5(8)    |
| C(17)-C(26)-C(27)-O(4)   | -179.0(5)  |
| C(25)-C(26)-C(27)-N(2)   | 172.6(5)   |
| C(17)-C(26)-C(27)-N(2)   | -1.8(6)    |
| C(27)-N(2)-C(28)-C(29)   | -154.3(4)  |
| I(2)-N(2)-C(28)-C(29)    | 30.3(5)    |
| C(27)-N(2)-C(28)-C(30)   | 82.8(6)    |
| I(2)-N(2)-C(28)-C(30)    | -92.6(5)   |
| I(1)-O(5)-C(29)-O(6)     | 0.5(6)     |
| I(1)-O(5)-C(29)-C(28)    | 178.2(3)   |
| N(2)-C(28)-C(29)-O(6)    | -26.4(6)   |
| C(30)-C(28)-C(29)-O(6)   | 96.2(6)    |
| N(2)-C(28)-C(29)-O(5)    | 155.8(4)   |
| C(30)-C(28)-C(29)-O(5)   | -81.6(6)   |
| N(2)-C(28)-C(30)-C(32A)  | -11(2)     |
| C(29)-C(28)-C(30)-C(32A) | -134(2)    |
| N(2)-C(28)-C(30)-C(31A)  | -171(4)    |
| C(29)-C(28)-C(30)-C(31A) | 67(4)      |
| N(2)-C(28)-C(30)-C(32)   | 56.4(9)    |
| C(29)-C(28)-C(30)-C(32)  | -65.7(8)   |
| N(2)-C(28)-C(30)-C(31)   | -177.0(15) |
| C(29)-C(28)-C(30)-C(31)  | 60.9(15)   |
| C(42)-C(33)-C(34)-C(35)  | 1.8(7)     |
| I(3)-C(33)-C(34)-C(35)   | -175.7(3)  |
| C(33)-C(34)-C(35)-C(36)  | 179.0(4)   |
| C(33)-C(34)-C(35)-C(40)  | 1.7(7)     |
| C(40)-C(35)-C(36)-C(37)  | 2.5(8)     |
| C(34)-C(35)-C(36)-C(37)  | -174.8(5)  |
| C(35)-C(36)-C(37)-C(38)  | -1.4(9)    |
| C(36)-C(37)-C(38)-C(39)  | -0.9(9)    |
| C(37)-C(38)-C(39)-C(40)  | 2.0(9)     |
| C(36)-C(35)-C(40)-C(41)  | 179.2(4)   |
| C(34)-C(35)-C(40)-C(41)  | -3.5(7)    |
| C(36)-C(35)-C(40)-C(39)  | -1.3(7)    |

|                         |           |
|-------------------------|-----------|
| C(34)-C(35)-C(40)-C(39) | 176.0(4)  |
| C(38)-C(39)-C(40)-C(41) | 178.6(5)  |
| C(38)-C(39)-C(40)-C(35) | -0.9(8)   |
| C(35)-C(40)-C(41)-C(42) | 1.9(7)    |
| C(39)-C(40)-C(41)-C(42) | -177.7(5) |
| C(40)-C(41)-C(42)-C(33) | 1.5(7)    |
| C(40)-C(41)-C(42)-C(43) | 178.4(4)  |
| C(34)-C(33)-C(42)-C(41) | -3.5(7)   |
| I(3)-C(33)-C(42)-C(41)  | 174.3(3)  |
| C(34)-C(33)-C(42)-C(43) | 179.5(4)  |
| I(3)-C(33)-C(42)-C(43)  | -2.7(5)   |
| C(44)-N(3)-C(43)-O(7)   | -3.1(7)   |
| I(3)-N(3)-C(43)-O(7)    | -176.8(4) |
| C(44)-N(3)-C(43)-C(42)  | 176.7(4)  |
| I(3)-N(3)-C(43)-C(42)   | 3.0(5)    |
| C(41)-C(42)-C(43)-O(7)  | 2.8(7)    |
| C(33)-C(42)-C(43)-O(7)  | 179.6(4)  |
| C(41)-C(42)-C(43)-N(3)  | -177.0(4) |
| C(33)-C(42)-C(43)-N(3)  | -0.1(6)   |
| C(43)-N(3)-C(44)-C(45)  | -164.8(4) |
| I(3)-N(3)-C(44)-C(45)   | 8.4(5)    |
| C(43)-N(3)-C(44)-C(46)  | 72.6(5)   |
| I(3)-N(3)-C(44)-C(46)   | -114.2(4) |
| I(2)-O(8)-C(45)-O(9)    | -5.9(6)   |
| I(2)-O(8)-C(45)-C(44)   | 171.0(3)  |
| N(3)-C(44)-C(45)-O(9)   | -14.7(6)  |
| C(46)-C(44)-C(45)-O(9)  | 108.4(6)  |
| N(3)-C(44)-C(45)-O(8)   | 168.3(4)  |
| C(46)-C(44)-C(45)-O(8)  | -68.6(6)  |
| N(3)-C(44)-C(46)-C(47)  | 77.7(5)   |
| C(45)-C(44)-C(46)-C(47) | -44.8(6)  |
| N(3)-C(44)-C(46)-C(48)  | -155.3(5) |
| C(45)-C(44)-C(46)-C(48) | 82.2(6)   |
| C(58)-C(49)-C(50)-C(51) | -0.1(7)   |
| I(4)-C(49)-C(50)-C(51)  | -176.4(3) |
| C(49)-C(50)-C(51)-C(56) | 0.8(7)    |

|                         |           |
|-------------------------|-----------|
| C(49)-C(50)-C(51)-C(52) | 179.4(4)  |
| C(56)-C(51)-C(52)-C(53) | 0.9(7)    |
| C(50)-C(51)-C(52)-C(53) | -177.7(4) |
| C(51)-C(52)-C(53)-C(54) | -0.5(8)   |
| C(52)-C(53)-C(54)-C(55) | 0.2(8)    |
| C(53)-C(54)-C(55)-C(56) | -0.4(8)   |
| C(50)-C(51)-C(56)-C(57) | -1.3(7)   |
| C(52)-C(51)-C(56)-C(57) | -179.8(4) |
| C(50)-C(51)-C(56)-C(55) | 177.5(4)  |
| C(52)-C(51)-C(56)-C(55) | -1.0(7)   |
| C(54)-C(55)-C(56)-C(57) | 179.6(5)  |
| C(54)-C(55)-C(56)-C(51) | 0.8(8)    |
| C(51)-C(56)-C(57)-C(58) | 1.0(7)    |
| C(55)-C(56)-C(57)-C(58) | -177.8(5) |
| C(56)-C(57)-C(58)-C(49) | -0.3(7)   |
| C(56)-C(57)-C(58)-C(59) | 179.4(4)  |
| C(50)-C(49)-C(58)-C(57) | -0.2(7)   |
| I(4)-C(49)-C(58)-C(57)  | 176.6(3)  |
| C(50)-C(49)-C(58)-C(59) | -179.8(4) |
| I(4)-C(49)-C(58)-C(59)  | -3.1(5)   |
| C(60)-N(4)-C(59)-O(10)  | -0.7(7)   |
| I(4)-N(4)-C(59)-O(10)   | -176.5(4) |
| C(60)-N(4)-C(59)-C(58)  | 177.4(4)  |
| I(4)-N(4)-C(59)-C(58)   | 1.7(5)    |
| C(57)-C(58)-C(59)-O(10) | -0.5(8)   |
| C(49)-C(58)-C(59)-O(10) | 179.2(4)  |
| C(57)-C(58)-C(59)-N(4)  | -178.6(4) |
| C(49)-C(58)-C(59)-N(4)  | 1.0(6)    |
| C(59)-N(4)-C(60)-C(61)  | -167.1(4) |
| I(4)-N(4)-C(60)-C(61)   | 8.3(5)    |
| C(59)-N(4)-C(60)-C(62)  | 71.1(5)   |
| I(4)-N(4)-C(60)-C(62)   | -113.4(4) |
| I(5)-O(11)-C(61)-O(12)  | -10.8(5)  |
| I(5)-O(11)-C(61)-C(60)  | 165.9(3)  |
| N(4)-C(60)-C(61)-O(12)  | -13.2(6)  |
| C(62)-C(60)-C(61)-O(12) | 109.8(5)  |

|                         |           |
|-------------------------|-----------|
| N(4)-C(60)-C(61)-O(11)  | 170.0(4)  |
| C(62)-C(60)-C(61)-O(11) | -67.0(5)  |
| N(4)-C(60)-C(62)-C(63)  | 78.8(5)   |
| C(61)-C(60)-C(62)-C(63) | -43.3(5)  |
| N(4)-C(60)-C(62)-C(64)  | -155.6(4) |
| C(61)-C(60)-C(62)-C(64) | 82.3(5)   |
| C(74)-C(65)-C(66)-C(67) | -0.7(7)   |
| I(5)-C(65)-C(66)-C(67)  | -177.3(3) |
| C(65)-C(66)-C(67)-C(72) | -1.1(7)   |
| C(65)-C(66)-C(67)-C(68) | 178.7(4)  |
| C(72)-C(67)-C(68)-C(69) | 0.2(7)    |
| C(66)-C(67)-C(68)-C(69) | -179.6(5) |
| C(67)-C(68)-C(69)-C(70) | -0.9(8)   |
| C(68)-C(69)-C(70)-C(71) | 0.4(8)    |
| C(69)-C(70)-C(71)-C(72) | 0.8(8)    |
| C(68)-C(67)-C(72)-C(73) | -177.8(5) |
| C(66)-C(67)-C(72)-C(73) | 2.0(7)    |
| C(68)-C(67)-C(72)-C(71) | 1.0(7)    |
| C(66)-C(67)-C(72)-C(71) | -179.2(4) |
| C(70)-C(71)-C(72)-C(73) | 177.3(5)  |
| C(70)-C(71)-C(72)-C(67) | -1.5(8)   |
| C(67)-C(72)-C(73)-C(74) | -1.1(8)   |
| C(71)-C(72)-C(73)-C(74) | -179.9(5) |
| C(72)-C(73)-C(74)-C(65) | -0.6(8)   |
| C(72)-C(73)-C(74)-C(75) | 179.2(5)  |
| C(66)-C(65)-C(74)-C(73) | 1.6(7)    |
| I(5)-C(65)-C(74)-C(73)  | 178.6(4)  |
| C(66)-C(65)-C(74)-C(75) | -178.2(5) |
| I(5)-C(65)-C(74)-C(75)  | -1.2(6)   |
| C(76)-N(5)-C(75)-O(13)  | -3.0(8)   |
| I(5)-N(5)-C(75)-O(13)   | -172.4(4) |
| C(76)-N(5)-C(75)-C(74)  | 177.4(4)  |
| I(5)-N(5)-C(75)-C(74)   | 8.1(6)    |
| C(73)-C(74)-C(75)-O(13) | -3.8(8)   |
| C(65)-C(74)-C(75)-O(13) | 176.0(5)  |
| C(73)-C(74)-C(75)-N(5)  | 175.7(5)  |



|                         |           |
|-------------------------|-----------|
| C(65)-C(74)-C(75)-N(5)  | -4.5(7)   |
| C(75)-N(5)-C(76)-C(77)  | -159.7(4) |
| I(5)-N(5)-C(76)-C(77)   | 8.8(5)    |
| C(75)-N(5)-C(76)-C(78)  | 78.6(6)   |
| I(5)-N(5)-C(76)-C(78)   | -112.9(4) |
| I(6)-O(14)-C(77)-O(15)  | -6.8(5)   |
| I(6)-O(14)-C(77)-C(76)  | 169.3(3)  |
| N(5)-C(76)-C(77)-O(15)  | -18.9(6)  |
| C(78)-C(76)-C(77)-O(15) | 103.2(5)  |
| N(5)-C(76)-C(77)-O(14)  | 164.9(4)  |
| C(78)-C(76)-C(77)-O(14) | -73.0(6)  |
| N(5)-C(76)-C(78)-C(79)  | -156.5(5) |
| C(77)-C(76)-C(78)-C(79) | 81.7(6)   |
| N(5)-C(76)-C(78)-C(80)  | 78.1(6)   |
| C(77)-C(76)-C(78)-C(80) | -43.7(6)  |
| C(90)-C(81)-C(82)-C(83) | 2.6(15)   |
| I(6)-C(81)-C(82)-C(83)  | -171.3(7) |
| C(81)-C(82)-C(83)-C(84) | 176.4(8)  |
| C(81)-C(82)-C(83)-C(88) | -0.2(11)  |
| C(88)-C(83)-C(84)-C(85) | 0.0       |
| C(82)-C(83)-C(84)-C(85) | -176.6(7) |
| C(83)-C(84)-C(85)-C(86) | 0.0       |
| C(84)-C(85)-C(86)-C(87) | 0.0       |
| C(85)-C(86)-C(87)-C(88) | 0.0       |
| C(86)-C(87)-C(88)-C(83) | 0.0       |
| C(86)-C(87)-C(88)-C(89) | 179.4(8)  |
| C(84)-C(83)-C(88)-C(87) | 0.0       |
| C(82)-C(83)-C(88)-C(87) | 176.6(7)  |
| C(84)-C(83)-C(88)-C(89) | -179.4(8) |
| C(82)-C(83)-C(88)-C(89) | -2.8(9)   |
| C(87)-C(88)-C(89)-C(90) | -176.0(7) |
| C(83)-C(88)-C(89)-C(90) | 3.4(11)   |
| C(88)-C(89)-C(90)-C(81) | -1.1(14)  |
| C(88)-C(89)-C(90)-C(91) | 178.5(8)  |
| C(82)-C(81)-C(90)-C(89) | -2.0(16)  |
| I(6)-C(81)-C(90)-C(89)  | 173.0(8)  |

|                             |            |
|-----------------------------|------------|
| C(82)-C(81)-C(90)-C(91)     | 178.4(10)  |
| I(6)-C(81)-C(90)-C(91)      | -6.6(11)   |
| C(92)-N(6)-C(91)-O(16)      | -1.0(15)   |
| I(6)-N(6)-C(91)-O(16)       | 171.3(9)   |
| C(92)-N(6)-C(91)-C(90)      | 178.0(8)   |
| I(6)-N(6)-C(91)-C(90)       | -9.7(11)   |
| C(89)-C(90)-C(91)-O(16)     | 10.3(15)   |
| C(81)-C(90)-C(91)-O(16)     | -170.1(10) |
| C(89)-C(90)-C(91)-N(6)      | -168.7(9)  |
| C(81)-C(90)-C(91)-N(6)      | 10.8(13)   |
| C(91)-N(6)-C(92)-C(93)      | -161.9(9)  |
| I(6)-N(6)-C(92)-C(93)       | 26.3(11)   |
| C(91)-N(6)-C(92)-C(94)      | 76.4(11)   |
| I(6)-N(6)-C(92)-C(94)       | -95.5(9)   |
| I(6)-O(18)-C(93)-O(17)      | -172.9(9)  |
| I(6)-O(18)-C(93)-C(92)      | 6.6(11)    |
| I(4)-O(17)-C(93)-O(18)      | -9.0(13)   |
| I(4)-O(17)-C(93)-C(92)      | 171.5(8)   |
| N(6)-C(92)-C(93)-O(18)      | -19.5(13)  |
| C(94)-C(92)-C(93)-O(18)     | 104.8(11)  |
| N(6)-C(92)-C(93)-O(17)      | 160.1(10)  |
| C(94)-C(92)-C(93)-O(17)     | -75.7(11)  |
| N(6)-C(92)-C(94)-C(96)      | 72.9(12)   |
| C(93)-C(92)-C(94)-C(96)     | -48.9(12)  |
| N(6)-C(92)-C(94)-C(95)      | -163.5(9)  |
| C(93)-C(92)-C(94)-C(95)     | 74.7(10)   |
| C(90A)-C(81A)-C(82A)-C(83A) | 2(2)       |
| I(6)-C(81A)-C(82A)-C(83A)   | -165.6(11) |
| C(81A)-C(82A)-C(83A)-C(84A) | 173.8(15)  |
| C(81A)-C(82A)-C(83A)-C(88A) | -1(2)      |
| C(88A)-C(83A)-C(84A)-C(85A) | 1(2)       |
| C(82A)-C(83A)-C(84A)-C(85A) | -174.0(15) |
| C(83A)-C(84A)-C(85A)-C(86A) | -2(3)      |
| C(84A)-C(85A)-C(86A)-C(87A) | 2(3)       |
| C(85A)-C(86A)-C(87A)-C(88A) | -1(2)      |
| C(84A)-C(83A)-C(88A)-C(87A) | 0(2)       |

|                             |            |
|-----------------------------|------------|
| C(82A)-C(83A)-C(88A)-C(87A) | 174.6(13)  |
| C(84A)-C(83A)-C(88A)-C(89A) | -176.8(14) |
| C(82A)-C(83A)-C(88A)-C(89A) | -2(2)      |
| C(86A)-C(87A)-C(88A)-C(83A) | 1(2)       |
| C(86A)-C(87A)-C(88A)-C(89A) | 176.9(14)  |
| C(83A)-C(88A)-C(89A)-C(90A) | 4(2)       |
| C(87A)-C(88A)-C(89A)-C(90A) | -172.8(14) |
| C(88A)-C(89A)-C(90A)-C(81A) | -3(2)      |
| C(88A)-C(89A)-C(90A)-C(91A) | 172.9(13)  |
| C(82A)-C(81A)-C(90A)-C(89A) | 0(2)       |
| I(6)-C(81A)-C(90A)-C(89A)   | 167.8(11)  |
| C(82A)-C(81A)-C(90A)-C(91A) | -175.8(15) |
| I(6)-C(81A)-C(90A)-C(91A)   | -7.6(19)   |
| C(92A)-N(6A)-C(91A)-O(16A)  | -1(2)      |
| I(6)-N(6A)-C(91A)-O(16A)    | 175.0(14)  |
| C(92A)-N(6A)-C(91A)-C(90A)  | 174.5(12)  |
| I(6)-N(6A)-C(91A)-C(90A)    | -9.9(16)   |
| C(89A)-C(90A)-C(91A)-O(16A) | 11(2)      |
| C(81A)-C(90A)-C(91A)-O(16A) | -173.2(16) |
| C(89A)-C(90A)-C(91A)-N(6A)  | -163.8(13) |
| C(81A)-C(90A)-C(91A)-N(6A)  | 11.7(19)   |
| C(91A)-N(6A)-C(92A)-C(93A)  | -161.3(13) |
| I(6)-N(6A)-C(92A)-C(93A)    | 23.6(15)   |
| C(91A)-N(6A)-C(92A)-C(94A)  | 75.6(16)   |
| I(6)-N(6A)-C(92A)-C(94A)    | -99.5(12)  |
| I(4)-O(17A)-C(93A)-O(18A)   | 1(2)       |
| I(4)-O(17A)-C(93A)-C(92A)   | 175.9(12)  |
| N(6A)-C(92A)-C(93A)-O(18A)  | -31.6(18)  |
| C(94A)-C(92A)-C(93A)-O(18A) | 93.3(15)   |
| N(6A)-C(92A)-C(93A)-O(17A)  | 153.4(15)  |
| C(94A)-C(92A)-C(93A)-O(17A) | -81.6(17)  |
| N(6A)-C(92A)-C(94A)-C(96A)  | 60.9(16)   |
| C(93A)-C(92A)-C(94A)-C(96A) | -60.8(15)  |
| N(6A)-C(92A)-C(94A)-C(95A)  | -170.6(13) |
| C(93A)-C(92A)-C(94A)-C(95A) | 67.7(15)   |
| C(100)-C(101)-O(19)-C(102)  | -180.0     |

C(101)-O(19)-C(102)-C(103)

180.0

---

Symmetry transformations used to generate equivalent atoms:

**University of Illinois, Department of Chemistry  
George L. Clark X- R Facility and 3M Materials Laboratory**

Structure report for compound **Valine HIM adduct in Naphthalene System 7b**

|                         |                                                                       |
|-------------------------|-----------------------------------------------------------------------|
| Identification code     | CCDC 2388282                                                          |
| Empirical formula       | C <sub>24</sub> H <sub>35</sub> Cl I N <sub>2</sub> O <sub>3.50</sub> |
| Principal Investigator: | Professor Dr. Kyle N Plunkett                                         |

**List of Tables**

Table 1. Crystallographic Experimental Details

Table 2. Atomic Coordinates and Equivalent Isotropic Displacement Parameters

Table 3. Selected Interatomic Distances and Selected Interatomic Angles

Table 4. Anisotropic Displacement Parameters

Table 5. Derived Atomic Coordinates and Displacement Parameters for Hydrogen Atoms

Table 6. Torsional Angles

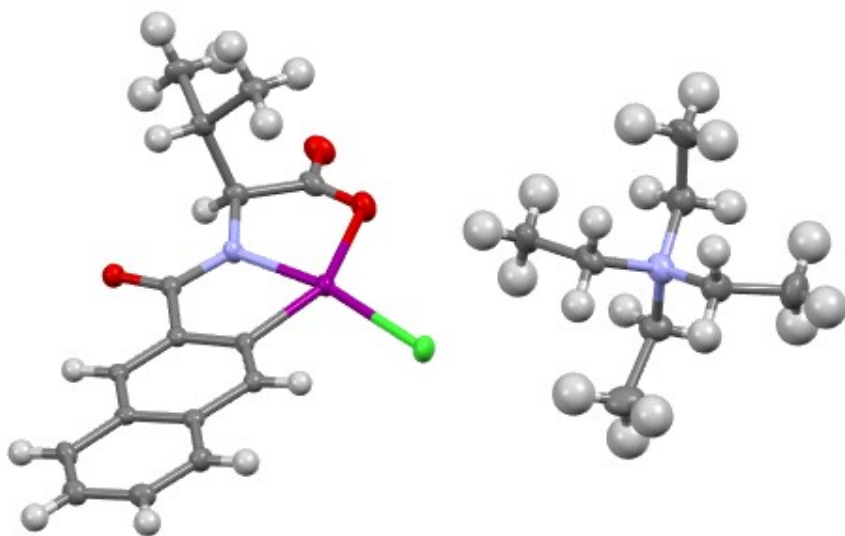

**Figure SI19:** Perspective view of crystallographically independent molecules of adduct. Solvents are removed for clarity. Nitrogen, oxygen, iodine and chlorine atoms are denoted by light blue, red, pink and green color respectively. Hydrogens atoms are omitted. (Ellipsoid style)

Table 1. Crystal data and structure refinement for 4536ds.

|                                   |                                                                       |                  |
|-----------------------------------|-----------------------------------------------------------------------|------------------|
| Identification code               | CCDC 2388282                                                          |                  |
| Empirical formula                 | C <sub>24</sub> H <sub>35</sub> Cl I N <sub>2</sub> O <sub>3.50</sub> |                  |
| Formula weight                    | 569.89                                                                |                  |
| Temperature                       | 100(2) K                                                              |                  |
| Wavelength                        | 0.71073 Å                                                             |                  |
| Crystal system                    | Monoclinic                                                            |                  |
| Space group                       | P2 <sub>1</sub>                                                       |                  |
| Unit cell dimensions              | a = 22.5400(5) Å                                                      | a = 90°.         |
|                                   | b = 12.1496(3) Å                                                      | b = 94.3703(6)°. |
|                                   | c = 26.9010(6) Å                                                      | g = 90°.         |
| Volume                            | 7345.5(3) Å <sup>3</sup>                                              |                  |
| Z                                 | 12                                                                    |                  |
| Density (calculated)              | 1.546 Mg/m <sup>3</sup>                                               |                  |
| Absorption coefficient            | 1.447 mm <sup>-1</sup>                                                |                  |
| F(000)                            | 3492                                                                  |                  |
| Crystal size                      | 0.213 x 0.086 x 0.051 mm <sup>3</sup>                                 |                  |
| Theta range for data collection   | 2.025 to 28.329°.                                                     |                  |
| Index ranges                      | -30<=h<=30, -16<=k<=16, -35<=l<=35                                    |                  |
| Reflections collected             | 256976                                                                |                  |
| Independent reflections           | 36572 [R(int) = 0.0713]                                               |                  |
| Completeness to theta = 25.242°   | 99.9 %                                                                |                  |
| Absorption correction             | Semi-empirical from equivalents                                       |                  |
| Max. and min. transmission        | 0.7457 and 0.6786                                                     |                  |
| Refinement method                 | Full-matrix least-squares on F <sup>2</sup>                           |                  |
| Data / restraints / parameters    | 36572 / 890 / 2014                                                    |                  |
| Goodness-of-fit on F <sup>2</sup> | 1.034                                                                 |                  |
| Final R indices [I>2sigma(I)]     | R1 = 0.0338, wR2 = 0.0609                                             |                  |
| R indices (all data)              | R1 = 0.0465, wR2 = 0.0671                                             |                  |
| Absolute structure parameter      | -0.030(5)                                                             |                  |
| Extinction coefficient            | n/a                                                                   |                  |
| Largest diff. peak and hole       | 1.288 and -0.823 e.Å <sup>-3</sup>                                    |                  |

Table 2. Atomic coordinates ( $\times 10^4$ ) and equivalent isotropic displacement parameters ( $\text{\AA}^2 \times 10^3$ ) for 4536ds.  $U(\text{eq})$  is defined as one third of the trace of the orthogonalized  $U^{ij}$  tensor.

|      | x       | y        | z        | U(eq) |
|------|---------|----------|----------|-------|
| I11  | 3333(1) | 5464(1)  | 9517(1)  | 20(1) |
| Cl11 | 4280(1) | 6539(1)  | 9163(1)  | 30(1) |
| O11  | 2966(2) | 2477(3)  | 10392(2) | 33(1) |
| O21  | 1548(1) | 5508(4)  | 9818(1)  | 23(1) |
| O31  | 3474(2) | 3770(3)  | 10012(2) | 29(1) |
| N11  | 2506(2) | 4953(4)  | 9735(2)  | 20(1) |
| C11  | 1959(2) | 8436(4)  | 9007(2)  | 19(1) |
| C21  | 1548(2) | 9290(4)  | 8871(2)  | 22(1) |
| C31  | 1703(2) | 10134(4) | 8571(2)  | 23(1) |
| C41  | 2277(2) | 10177(4) | 8391(2)  | 24(1) |
| C51  | 2682(2) | 9367(5)  | 8517(2)  | 24(1) |
| C61  | 2537(2) | 8476(4)  | 8825(2)  | 20(1) |
| C71  | 2955(2) | 7630(5)  | 8957(2)  | 22(1) |
| C81  | 2786(2) | 6788(4)  | 9251(2)  | 19(1) |
| C91  | 2210(2) | 6710(4)  | 9425(2)  | 18(1) |
| C101 | 1810(2) | 7526(4)  | 9304(2)  | 20(1) |
| C111 | 2052(2) | 5684(4)  | 9684(2)  | 20(1) |
| C121 | 2405(2) | 3845(4)  | 9926(2)  | 21(1) |
| C131 | 2994(2) | 3315(5)  | 10135(2) | 25(1) |
| C141 | 2086(2) | 3124(4)  | 9512(2)  | 22(1) |
| C151 | 2508(3) | 2752(5)  | 9126(2)  | 27(1) |
| C161 | 1767(3) | 2145(5)  | 9725(2)  | 30(1) |
| I12  | 5053(1) | 5444(1)  | 7764(1)  | 19(1) |
| Cl12 | 5986(1) | 6559(1)  | 7376(1)  | 27(1) |
| O12  | 4746(2) | 2483(3)  | 8677(2)  | 29(1) |
| O22  | 3306(1) | 5498(4)  | 8158(1)  | 22(1) |
| O32  | 5225(2) | 3758(3)  | 8258(2)  | 27(1) |
| N12  | 4244(2) | 4930(3)  | 8018(2)  | 19(1) |
| C12  | 3646(2) | 8398(4)  | 7310(2)  | 18(1) |
| C22  | 3225(2) | 9256(4)  | 7194(2)  | 22(1) |
| C32  | 3356(2) | 10098(4) | 6885(2)  | 22(1) |



|      |         |          |         |       |
|------|---------|----------|---------|-------|
| C42  | 3907(2) | 10134(4) | 6673(2) | 24(1) |
| C52  | 4324(2) | 9329(4)  | 6777(2) | 23(1) |
| C62  | 4210(2) | 8441(4)  | 7099(2) | 20(1) |
| C72  | 4635(2) | 7604(4)  | 7215(2) | 21(1) |
| C82  | 4493(2) | 6769(4)  | 7517(2) | 17(1) |
| C92  | 3934(2) | 6681(4)  | 7720(2) | 19(1) |
| C102 | 3519(2) | 7499(4)  | 7618(2) | 19(1) |
| C112 | 3791(2) | 5668(4)  | 7995(2) | 17(1) |
| C122 | 4157(2) | 3840(4)  | 8228(2) | 19(1) |
| C132 | 4757(2) | 3310(4)  | 8407(2) | 22(1) |
| C142 | 3807(2) | 3101(4)  | 7839(2) | 20(1) |
| C152 | 4198(3) | 2695(5)  | 7439(2) | 28(1) |
| C162 | 3500(3) | 2137(5)  | 8083(2) | 29(1) |
| I13  | 8194(1) | 5452(1)  | 4250(1) | 18(1) |
| CI13 | 9087(1) | 6622(1)  | 3884(1) | 26(1) |
| O13  | 7947(2) | 2459(3)  | 5169(2) | 35(1) |
| O23  | 6446(1) | 5368(4)  | 4639(1) | 22(1) |
| O33  | 8398(2) | 3709(3)  | 4721(2) | 28(1) |
| N13  | 7393(2) | 4853(3)  | 4489(2) | 17(1) |
| C13  | 6735(2) | 8316(4)  | 3796(2) | 17(1) |
| C23  | 6303(2) | 9148(4)  | 3680(2) | 20(1) |
| C33  | 6421(2) | 10007(4) | 3378(2) | 22(1) |
| C43  | 6979(2) | 10084(4) | 3171(2) | 23(1) |
| C53  | 7403(2) | 9305(4)  | 3273(2) | 21(1) |
| C63  | 7297(2) | 8401(4)  | 3590(2) | 18(1) |
| C73  | 7742(2) | 7590(4)  | 3709(2) | 18(1) |
| C83  | 7611(2) | 6731(4)  | 4008(2) | 16(1) |
| C93  | 7051(2) | 6606(4)  | 4199(2) | 16(1) |
| C103 | 6621(2) | 7395(4)  | 4100(2) | 18(1) |
| C113 | 6930(2) | 5571(5)  | 4471(2) | 19(1) |
| C123 | 7337(2) | 3763(4)  | 4711(2) | 20(1) |
| C133 | 7942(2) | 3270(5)  | 4890(2) | 25(1) |
| C143 | 6990(2) | 3000(4)  | 4330(2) | 23(1) |
| C153 | 7366(3) | 2684(5)  | 3903(2) | 28(1) |
| C163 | 6742(3) | 1970(5)  | 4569(2) | 34(1) |
| I14  | 6680(1) | 5381(1)  | 5974(1) | 18(1) |

|      |         |          |         |       |
|------|---------|----------|---------|-------|
| CI14 | 7544(1) | 6492(1)  | 5549(1) | 23(1) |
| O14  | 6449(2) | 2351(3)  | 6877(2) | 31(1) |
| O24  | 4963(1) | 5362(3)  | 6434(1) | 22(1) |
| O34  | 6894(2) | 3657(3)  | 6449(2) | 31(1) |
| N14  | 5895(2) | 4830(4)  | 6264(2) | 21(1) |
| C14  | 5212(2) | 8255(4)  | 5547(2) | 19(1) |
| C24  | 4780(2) | 9095(4)  | 5442(2) | 21(1) |
| C34  | 4890(2) | 9937(4)  | 5124(2) | 24(1) |
| C44  | 5426(2) | 9987(4)  | 4890(2) | 22(1) |
| C54  | 5855(2) | 9187(4)  | 4982(2) | 19(1) |
| C64  | 5760(2) | 8309(4)  | 5314(2) | 18(1) |
| C74  | 6207(2) | 7492(4)  | 5421(2) | 17(1) |
| C84  | 6086(2) | 6663(4)  | 5741(2) | 16(1) |
| C94  | 5544(2) | 6565(4)  | 5962(2) | 18(1) |
| C104 | 5115(2) | 7362(4)  | 5867(2) | 19(1) |
| C114 | 5434(2) | 5556(5)  | 6249(2) | 19(1) |
| C124 | 5832(2) | 3734(4)  | 6474(2) | 21(1) |
| C134 | 6439(3) | 3197(5)  | 6617(2) | 25(1) |
| C144 | 5447(2) | 3019(4)  | 6097(2) | 22(1) |
| C154 | 5134(3) | 2091(5)  | 6353(2) | 28(1) |
| C164 | 5811(3) | 2575(5)  | 5681(2) | 28(1) |
| I15  | 1530(1) | 5530(1)  | 1146(1) | 18(1) |
| CI15 | 2482(1) | 6690(1)  | 862(1)  | 28(1) |
| O15  | 1162(2) | 2571(3)  | 2043(2) | 31(1) |
| O25  | -278(1) | 5458(4)  | 1350(1) | 22(1) |
| O35  | 1672(2) | 3795(3)  | 1622(2) | 30(1) |
| N15  | 694(2)  | 4950(3)  | 1312(2) | 19(1) |
| C15  | 134(2)  | 8403(4)  | 554(2)  | 17(1) |
| C25  | -283(2) | 9234(4)  | 397(2)  | 21(1) |
| C35  | -117(2) | 10097(4) | 111(2)  | 24(1) |
| C45  | 472(2)  | 10183(4) | -29(2)  | 23(1) |
| C55  | 887(2)  | 9400(4)  | 119(2)  | 23(1) |
| C65  | 729(2)  | 8494(4)  | 412(2)  | 18(1) |
| C75  | 1156(2) | 7674(4)  | 571(2)  | 18(1) |
| C85  | 981(2)  | 6822(4)  | 852(2)  | 17(1) |
| C95  | 390(2)  | 6691(4)  | 981(2)  | 17(1) |

|      |          |          |         |       |
|------|----------|----------|---------|-------|
| C105 | -25(2)   | 7479(4)  | 838(2)  | 17(1) |
| C115 | 231(2)   | 5662(4)  | 1240(2) | 18(1) |
| C125 | 610(2)   | 3848(4)  | 1518(2) | 22(1) |
| C135 | 1193(3)  | 3372(5)  | 1751(2) | 24(1) |
| C145 | 314(2)   | 3100(4)  | 1101(2) | 23(1) |
| C155 | 23(3)    | 2083(5)  | 1305(2) | 30(1) |
| C165 | 760(3)   | 2778(5)  | 722(2)  | 26(1) |
| I16  | 9781(1)  | 5626(1)  | 2653(1) | 18(1) |
| CI16 | 10706(1) | 6775(1)  | 2370(1) | 26(1) |
| O16  | 9419(2)  | 2621(3)  | 3531(2) | 38(1) |
| O26  | 7983(1)  | 5550(3)  | 2904(1) | 22(1) |
| O36  | 9921(2)  | 3879(3)  | 3132(2) | 31(1) |
| N16  | 8944(2)  | 5024(3)  | 2826(2) | 18(1) |
| C16  | 8365(2)  | 8493(4)  | 2097(2) | 18(1) |
| C26  | 7948(2)  | 9330(4)  | 1961(2) | 20(1) |
| C36  | 8100(2)  | 10189(4) | 1672(2) | 21(1) |
| C46  | 8675(2)  | 10258(4) | 1499(2) | 21(1) |
| C56  | 9091(2)  | 9471(4)  | 1627(2) | 20(1) |
| C66  | 8950(2)  | 8571(4)  | 1931(2) | 18(1) |
| C76  | 9384(2)  | 7750(4)  | 2077(2) | 18(1) |
| C86  | 9217(2)  | 6897(4)  | 2364(2) | 16(1) |
| C96  | 8638(2)  | 6775(4)  | 2516(2) | 17(1) |
| C106 | 8219(2)  | 7571(4)  | 2388(2) | 18(1) |
| C116 | 8485(2)  | 5737(4)  | 2775(2) | 18(1) |
| C126 | 8858(2)  | 3928(4)  | 3034(2) | 23(1) |
| C136 | 9444(3)  | 3434(5)  | 3258(2) | 27(1) |
| C146 | 8547(3)  | 3178(4)  | 2623(2) | 24(1) |
| C156 | 8288(3)  | 2140(5)  | 2834(2) | 34(1) |
| C166 | 8972(3)  | 2899(5)  | 2221(2) | 27(1) |
| N17  | 4237(3)  | 4503(8)  | 1550(4) | 31(1) |
| C17  | 4186(4)  | 5044(6)  | 2055(3) | 35(2) |
| C27  | 4021(8)  | 6300(14) | 2026(6) | 45(4) |
| C37  | 4304(4)  | 3289(7)  | 1640(3) | 37(2) |
| C47  | 4314(5)  | 2587(7)  | 1183(4) | 42(2) |
| C57  | 3694(3)  | 4746(6)  | 1198(3) | 34(2) |
| C67  | 3104(4)  | 4309(8)  | 1391(4) | 38(2) |

|      |          |          |          |       |
|------|----------|----------|----------|-------|
| C77  | 4767(3)  | 4955(7)  | 1303(3)  | 34(2) |
| C87  | 5373(5)  | 4686(15) | 1565(5)  | 45(3) |
| N1A8 | 4202(11) | 4580(30) | 1573(14) | 34(3) |
| C1A8 | 4125(14) | 5840(20) | 1558(10) | 39(3) |
| C2A8 | 4140(40) | 6310(50) | 2120(20) | 45(8) |
| C3A8 | 4252(14) | 4170(20) | 1053(10) | 38(3) |
| C4A8 | 4310(30) | 2920(30) | 1029(18) | 52(8) |
| C5A8 | 3687(11) | 4050(20) | 1819(10) | 35(3) |
| C6A8 | 3083(15) | 3950(40) | 1510(20) | 53(8) |
| C7A8 | 4757(11) | 4320(30) | 1907(10) | 36(3) |
| C8A8 | 5359(15) | 4540(60) | 1710(20) | 37(8) |
| N19  | 2789(2)  | 4311(4)  | 3304(2)  | 21(1) |
| C19  | 2660(3)  | 4795(5)  | 2794(2)  | 29(1) |
| C29  | 2020(3)  | 5166(6)  | 2674(2)  | 42(2) |
| C39  | 2370(3)  | 3367(5)  | 3386(2)  | 27(1) |
| C49  | 2374(3)  | 2451(5)  | 3005(2)  | 32(1) |
| C59  | 3417(2)  | 3864(5)  | 3360(2)  | 27(1) |
| C69  | 3903(3)  | 4723(5)  | 3385(2)  | 33(1) |
| C79  | 2696(2)  | 5215(4)  | 3681(2)  | 24(1) |
| C89  | 2865(3)  | 4920(5)  | 4222(2)  | 32(1) |
| N110 | 9723(2)  | 4550(4)  | 6548(2)  | 21(1) |
| C110 | 9625(3)  | 3393(5)  | 6358(2)  | 32(1) |
| C210 | 9516(3)  | 3291(5)  | 5792(2)  | 32(1) |
| C310 | 9242(2)  | 5315(6)  | 6348(2)  | 33(1) |
| C410 | 8617(3)  | 5022(6)  | 6496(3)  | 49(2) |
| C510 | 9757(3)  | 4486(5)  | 7107(2)  | 33(1) |
| C610 | 9869(3)  | 5585(5)  | 7369(2)  | 36(1) |
| C710 | 10304(3) | 5027(5)  | 6375(2)  | 35(1) |
| C810 | 10866(3) | 4448(6)  | 6596(3)  | 56(2) |
| N111 | 935(2)   | 4332(3)  | 4647(2)  | 18(1) |
| C111 | 1144(2)  | 5345(5)  | 4379(2)  | 22(1) |
| C211 | 884(2)   | 5488(5)  | 3842(2)  | 28(1) |
| C311 | 259(2)   | 4245(5)  | 4606(2)  | 25(1) |
| C411 | -66(2)   | 5234(5)  | 4800(2)  | 30(1) |
| C511 | 1176(3)  | 3305(4)  | 4413(2)  | 25(1) |
| C611 | 990(3)   | 2240(5)  | 4644(2)  | 30(1) |

|       |          |          |           |       |
|-------|----------|----------|-----------|-------|
| C711  | 1153(2)  | 4432(4)  | 5190(2)   | 22(1) |
| C811  | 1824(3)  | 4435(6)  | 5293(2)   | 34(1) |
| N112  | 6006(7)  | 4502(13) | 9820(5)   | 27(2) |
| C112  | 5988(6)  | 5017(9)  | 10331(4)  | 34(2) |
| C212  | 5850(18) | 6210(20) | 10352(10) | 37(5) |
| C312  | 6497(5)  | 5036(10) | 9548(4)   | 34(2) |
| C412  | 7127(9)  | 4760(20) | 9761(8)   | 37(4) |
| C512  | 5437(4)  | 4687(9)  | 9504(4)   | 30(2) |
| C612  | 4883(9)  | 4190(20) | 9702(7)   | 39(4) |
| C712  | 6119(5)  | 3276(9)  | 9883(4)   | 33(2) |
| C812  | 6103(11) | 2616(15) | 9415(7)   | 40(4) |
| N1A13 | 5988(9)  | 4570(15) | 9845(6)   | 28(2) |
| C1A13 | 5497(5)  | 4037(11) | 10124(5)  | 32(2) |
| C2A13 | 4883(10) | 4120(30) | 9893(7)   | 39(5) |
| C3A13 | 5891(6)  | 5808(10) | 9819(5)   | 34(2) |
| C4A13 | 5780(20) | 6400(30) | 10300(13) | 51(7) |
| C5A13 | 5962(6)  | 4144(11) | 9321(5)   | 33(2) |
| C6A13 | 6056(12) | 2908(16) | 9273(8)   | 39(5) |
| C7A13 | 6570(5)  | 4283(12) | 10132(5)  | 35(2) |
| C8A13 | 7127(12) | 4600(30) | 9913(10)  | 46(6) |
| N114  | 7705(9)  | 4495(16) | 8104(8)   | 23(2) |
| C114  | 7652(10) | 5733(17) | 8036(9)   | 34(3) |
| C214  | 7581(13) | 6370(20) | 8512(11)  | 49(5) |
| C314  | 8220(10) | 4140(20) | 8456(11)  | 26(3) |
| C414  | 8827(13) | 4490(40) | 8321(17)  | 33(6) |
| C514  | 7151(10) | 4030(30) | 8314(11)  | 27(3) |
| C614  | 6580(11) | 4130(30) | 7974(11)  | 34(5) |
| C714  | 7757(9)  | 4017(18) | 7592(7)   | 26(3) |
| C814  | 7788(12) | 2772(19) | 7572(9)   | 39(5) |
| N1A15 | 7749(10) | 4619(18) | 8148(8)   | 24(2) |
| C1A15 | 7688(11) | 5866(17) | 8195(9)   | 31(3) |
| C2A15 | 7631(16) | 6330(20) | 8713(11)  | 54(6) |
| C3A15 | 8305(11) | 4250(30) | 8451(11)  | 26(4) |
| C4A15 | 8884(13) | 4620(40) | 8262(19)  | 31(5) |
| C5A15 | 7229(11) | 4060(30) | 8362(12)  | 30(4) |
| C6A15 | 6614(13) | 4300(30) | 8105(12)  | 41(6) |

|       |          |          |          |       |
|-------|----------|----------|----------|-------|
| C7A15 | 7783(11) | 4390(20) | 7603(8)  | 31(3) |
| C8A15 | 7814(13) | 3160(20) | 7484(10) | 39(5) |
| O(1)  | 7965(2)  | 2498(4)  | 6209(2)  | 38(1) |
| O(2)  | 1000(2)  | 2836(4)  | 3083(2)  | 32(1) |
| O(3)  | 750(2)   | 7047(4)  | 5480(2)  | 39(1) |

---

Table 3. Bond lengths [Å] and angles [°] for 4536ds.

---

|            |            |
|------------|------------|
| I11-N11    | 2.090(4)   |
| I11-C81    | 2.118(5)   |
| I11-O31    | 2.458(4)   |
| I11-Cl11   | 2.7351(15) |
| O11-C131   | 1.235(7)   |
| O21-C111   | 1.237(6)   |
| O31-C131   | 1.282(7)   |
| N11-C111   | 1.354(6)   |
| N11-C121   | 1.465(6)   |
| C11-C21    | 1.419(7)   |
| C11-C101   | 1.420(7)   |
| C11-C61    | 1.427(7)   |
| C21-C31    | 1.367(7)   |
| C21-H21    | 0.9500     |
| C31-C41    | 1.416(7)   |
| C31-H31    | 0.9500     |
| C41-C51    | 1.368(7)   |
| C41-H41    | 0.9500     |
| C51-C61    | 1.418(8)   |
| C51-H51    | 0.9500     |
| C61-C71    | 1.420(7)   |
| C71-C81    | 1.366(7)   |
| C71-H71    | 0.9500     |
| C81-C91    | 1.415(7)   |
| C91-C101   | 1.363(7)   |
| C91-C111   | 1.486(7)   |
| C101-H101  | 0.9500     |
| C121-C131  | 1.542(7)   |
| C121-C141  | 1.551(7)   |
| C121-H121  | 1.0000     |
| C141-C161  | 1.523(7)   |
| C141-C151  | 1.530(7)   |
| C141-H141  | 1.0000     |
| C151-H15A1 | 0.9800     |

|            |            |
|------------|------------|
| C151-H15B1 | 0.9800     |
| C151-H15C1 | 0.9800     |
| C161-H16A1 | 0.9800     |
| C161-H16B1 | 0.9800     |
| C161-H16C1 | 0.9800     |
| I12-N12    | 2.090(4)   |
| I12-C82    | 2.120(5)   |
| I12-O32    | 2.458(4)   |
| I12-C112   | 2.7704(13) |
| O12-C132   | 1.240(6)   |
| O22-C112   | 1.225(5)   |
| O32-C132   | 1.278(6)   |
| N12-C112   | 1.358(6)   |
| N12-C122   | 1.459(6)   |
| C12-C102   | 1.413(7)   |
| C12-C22    | 1.428(7)   |
| C12-C62    | 1.431(7)   |
| C22-C32    | 1.365(7)   |
| C22-H22    | 0.9500     |
| C32-C42    | 1.407(7)   |
| C32-H32    | 0.9500     |
| C42-C52    | 1.370(7)   |
| C42-H42    | 0.9500     |
| C52-C62    | 1.420(7)   |
| C52-H52    | 0.9500     |
| C62-C72    | 1.416(7)   |
| C72-C82    | 1.355(7)   |
| C72-H72    | 0.9500     |
| C82-C92    | 1.412(7)   |
| C92-C102   | 1.379(7)   |
| C92-C112   | 1.485(7)   |
| C102-H102  | 0.9500     |
| C122-C132  | 1.542(7)   |
| C122-C142  | 1.550(7)   |
| C122-H122  | 1.0000     |
| C142-C152  | 1.522(7)   |



|            |            |
|------------|------------|
| C142-C162  | 1.534(7)   |
| C142-H142  | 1.0000     |
| C152-H15A2 | 0.9800     |
| C152-H15B2 | 0.9800     |
| C152-H15C2 | 0.9800     |
| C162-H16A2 | 0.9800     |
| C162-H16B2 | 0.9800     |
| C162-H16C2 | 0.9800     |
| I13-N13    | 2.091(4)   |
| I13-C83    | 2.107(5)   |
| I13-CI13   | 2.7096(14) |
| O13-C133   | 1.238(7)   |
| O23-C113   | 1.239(5)   |
| O33-C133   | 1.274(7)   |
| N13-C113   | 1.358(6)   |
| N13-C123   | 1.463(6)   |
| C13-C103   | 1.421(7)   |
| C13-C23    | 1.422(7)   |
| C13-C63    | 1.427(7)   |
| C23-C33    | 1.362(7)   |
| C23-H23    | 0.9500     |
| C33-C43    | 1.417(7)   |
| C33-H33    | 0.9500     |
| C43-C53    | 1.358(7)   |
| C43-H43    | 0.9500     |
| C53-C63    | 1.421(7)   |
| C53-H53    | 0.9500     |
| C63-C73    | 1.426(7)   |
| C73-C83    | 1.364(7)   |
| C73-H73    | 0.9500     |
| C83-C93    | 1.407(7)   |
| C93-C103   | 1.375(7)   |
| C93-C113   | 1.489(7)   |
| C103-H103  | 0.9500     |
| C123-C133  | 1.532(7)   |
| C123-C143  | 1.549(7)   |

|            |            |
|------------|------------|
| C123-H123  | 1.0000     |
| C143-C153  | 1.527(7)   |
| C143-C163  | 1.532(8)   |
| C143-H143  | 1.0000     |
| C153-H15A3 | 0.9800     |
| C153-H15B3 | 0.9800     |
| C153-H15C3 | 0.9800     |
| C163-H16A3 | 0.9800     |
| C163-H16B3 | 0.9800     |
| C163-H16C3 | 0.9800     |
| I14-N14    | 2.098(4)   |
| I14-C84    | 2.117(5)   |
| I14-O34    | 2.482(4)   |
| I14-C114   | 2.6945(13) |
| O14-C134   | 1.242(7)   |
| O24-C114   | 1.227(5)   |
| O34-C134   | 1.281(7)   |
| N14-C114   | 1.361(6)   |
| N14-C124   | 1.457(6)   |
| C14-C104   | 1.412(7)   |
| C14-C24    | 1.424(7)   |
| C14-C64    | 1.428(7)   |
| C24-C34    | 1.367(7)   |
| C24-H24    | 0.9500     |
| C34-C44    | 1.407(7)   |
| C34-H34    | 0.9500     |
| C44-C54    | 1.380(7)   |
| C44-H44    | 0.9500     |
| C54-C64    | 1.418(7)   |
| C54-H54    | 0.9500     |
| C64-C74    | 1.428(7)   |
| C74-C84    | 1.366(7)   |
| C74-H74    | 0.9500     |
| C84-C94    | 1.405(7)   |
| C94-C104   | 1.378(7)   |
| C94-C114   | 1.481(7)   |

|            |            |
|------------|------------|
| C104-H104  | 0.9500     |
| C124-C134  | 1.537(7)   |
| C124-C144  | 1.550(7)   |
| C124-H124  | 1.0000     |
| C144-C154  | 1.523(7)   |
| C144-C164  | 1.535(7)   |
| C144-H144  | 1.0000     |
| C154-H15A4 | 0.9800     |
| C154-H15B4 | 0.9800     |
| C154-H15C4 | 0.9800     |
| C164-H16A4 | 0.9800     |
| C164-H16B4 | 0.9800     |
| C164-H16C4 | 0.9800     |
| I15-N15    | 2.093(4)   |
| I15-C85    | 2.115(5)   |
| I15-O35    | 2.474(4)   |
| I15-Cl15   | 2.7230(14) |
| O15-C135   | 1.256(7)   |
| O25-C115   | 1.232(5)   |
| O35-C135   | 1.268(7)   |
| N15-C115   | 1.358(6)   |
| N15-C125   | 1.466(6)   |
| C15-C105   | 1.419(7)   |
| C15-C25    | 1.420(7)   |
| C15-C65    | 1.428(7)   |
| C25-C35    | 1.368(7)   |
| C25-H25    | 0.9500     |
| C35-C45    | 1.412(7)   |
| C35-H35    | 0.9500     |
| C45-C55    | 1.372(7)   |
| C45-H45    | 0.9500     |
| C55-C65    | 1.415(7)   |
| C55-H55    | 0.9500     |
| C65-C75    | 1.428(7)   |
| C75-C85    | 1.358(7)   |
| C75-H75    | 0.9500     |

|            |            |
|------------|------------|
| C85-C95    | 1.410(7)   |
| C95-C105   | 1.373(7)   |
| C95-C115   | 1.489(7)   |
| C105-H105  | 0.9500     |
| C125-C135  | 1.527(7)   |
| C125-C145  | 1.555(7)   |
| C125-H125  | 1.0000     |
| C145-C155  | 1.520(7)   |
| C145-C165  | 1.535(7)   |
| C145-H145  | 1.0000     |
| C155-H15A5 | 0.9800     |
| C155-H15B5 | 0.9800     |
| C155-H15C5 | 0.9800     |
| C165-H16A5 | 0.9800     |
| C165-H16B5 | 0.9800     |
| C165-H16C5 | 0.9800     |
| I16-N16    | 2.108(4)   |
| I16-C86    | 2.111(5)   |
| I16-CI16   | 2.6677(14) |
| O16-C136   | 1.236(7)   |
| O26-C116   | 1.228(6)   |
| O36-C136   | 1.272(7)   |
| N16-C116   | 1.350(6)   |
| N16-C126   | 1.462(6)   |
| C16-C26    | 1.415(7)   |
| C16-C106   | 1.419(7)   |
| C16-C66    | 1.426(7)   |
| C26-C36    | 1.360(7)   |
| C26-H26    | 0.9500     |
| C36-C46    | 1.414(7)   |
| C36-H36    | 0.9500     |
| C46-C56    | 1.364(7)   |
| C46-H46    | 0.9500     |
| C56-C66    | 1.416(7)   |
| C56-H56    | 0.9500     |
| C66-C76    | 1.432(7)   |

|            |           |
|------------|-----------|
| C76-C86    | 1.363(7)  |
| C76-H76    | 0.9500    |
| C86-C96    | 1.405(7)  |
| C96-C106   | 1.377(7)  |
| C96-C116   | 1.493(7)  |
| C106-H106  | 0.9500    |
| C126-C136  | 1.531(8)  |
| C126-C146  | 1.557(8)  |
| C126-H126  | 1.0000    |
| C146-C156  | 1.519(8)  |
| C146-C166  | 1.536(7)  |
| C146-H146  | 1.0000    |
| C156-H15A6 | 0.9800    |
| C156-H15B6 | 0.9800    |
| C156-H15C6 | 0.9800    |
| C166-H16A6 | 0.9800    |
| C166-H16B6 | 0.9800    |
| C166-H16C6 | 0.9800    |
| N17-C37    | 1.501(13) |
| N17-C77    | 1.515(12) |
| N17-C57    | 1.518(12) |
| N17-C17    | 1.521(12) |
| C17-C27    | 1.571(18) |
| C17-H1A7   | 0.9900    |
| C17-H1B7   | 0.9900    |
| C27-H2A7   | 0.9800    |
| C27-H2B7   | 0.9800    |
| C27-H2C7   | 0.9800    |
| C37-C47    | 1.497(12) |
| C37-H3A7   | 0.9900    |
| C37-H3B7   | 0.9900    |
| C47-H4A7   | 0.9800    |
| C47-H4B7   | 0.9800    |
| C47-H4C7   | 0.9800    |
| C57-C67    | 1.556(11) |
| C57-H5A7   | 0.9900    |

|           |           |
|-----------|-----------|
| C57-H5B7  | 0.9900    |
| C67-H6A7  | 0.9800    |
| C67-H6B7  | 0.9800    |
| C67-H6C7  | 0.9800    |
| C77-C87   | 1.524(12) |
| C77-H7A7  | 0.9900    |
| C77-H7B7  | 0.9900    |
| C87-H8A7  | 0.9800    |
| C87-H8B7  | 0.9800    |
| C87-H8C7  | 0.9800    |
| N1A8-C3A8 | 1.50(3)   |
| N1A8-C7A8 | 1.52(3)   |
| N1A8-C5A8 | 1.52(3)   |
| N1A8-C1A8 | 1.53(3)   |
| C1A8-C2A8 | 1.61(3)   |
| C1A8-H1C8 | 0.9900    |
| C1A8-H1D8 | 0.9900    |
| C2A8-H2D8 | 0.9800    |
| C2A8-H2E8 | 0.9800    |
| C2A8-H2F8 | 0.9800    |
| C3A8-C4A8 | 1.52(3)   |
| C3A8-H3C8 | 0.9900    |
| C3A8-H3D8 | 0.9900    |
| C4A8-H4D8 | 0.9800    |
| C4A8-H4E8 | 0.9800    |
| C4A8-H4F8 | 0.9800    |
| C5A8-C6A8 | 1.54(3)   |
| C5A8-H5C8 | 0.9900    |
| C5A8-H5D8 | 0.9900    |
| C6A8-H6D8 | 0.9800    |
| C6A8-H6E8 | 0.9800    |
| C6A8-H6F8 | 0.9800    |
| C7A8-C8A8 | 1.52(3)   |
| C7A8-H7C8 | 0.9900    |
| C7A8-H7D8 | 0.9900    |
| C8A8-H8D8 | 0.9800    |

|            |          |
|------------|----------|
| C8A8-H8E8  | 0.9800   |
| C8A8-H8F8  | 0.9800   |
| N19-C19    | 1.499(7) |
| N19-C39    | 1.513(7) |
| N19-C59    | 1.514(7) |
| N19-C79    | 1.521(7) |
| C19-C29    | 1.523(8) |
| C19-H1A9   | 0.9900   |
| C19-H1B9   | 0.9900   |
| C29-H2A9   | 0.9800   |
| C29-H2B9   | 0.9800   |
| C29-H2C9   | 0.9800   |
| C39-C49    | 1.514(8) |
| C39-H3A9   | 0.9900   |
| C39-H3B9   | 0.9900   |
| C49-H4A9   | 0.9800   |
| C49-H4B9   | 0.9800   |
| C49-H4C9   | 0.9800   |
| C59-C69    | 1.511(8) |
| C59-H5A9   | 0.9900   |
| C59-H5B9   | 0.9900   |
| C69-H6A9   | 0.9800   |
| C69-H6B9   | 0.9800   |
| C69-H6C9   | 0.9800   |
| C79-C89    | 1.519(7) |
| C79-H7A9   | 0.9900   |
| C79-H7B9   | 0.9900   |
| C89-H8A9   | 0.9800   |
| C89-H8B9   | 0.9800   |
| C89-H8C9   | 0.9800   |
| N110-C310  | 1.496(7) |
| N110-C510  | 1.503(7) |
| N110-C110  | 1.506(7) |
| N110-C710  | 1.537(7) |
| C110-C210  | 1.529(8) |
| C110-H1A10 | 0.9900   |

|            |          |
|------------|----------|
| C110-H1B10 | 0.9900   |
| C210-H2A10 | 0.9800   |
| C210-H2B10 | 0.9800   |
| C210-H2C10 | 0.9800   |
| C310-C410  | 1.536(9) |
| C310-H3A10 | 0.9900   |
| C310-H3B10 | 0.9900   |
| C410-H4A10 | 0.9800   |
| C410-H4B10 | 0.9800   |
| C410-H4C10 | 0.9800   |
| C510-C610  | 1.522(8) |
| C510-H5A10 | 0.9900   |
| C510-H5B10 | 0.9900   |
| C610-H6A10 | 0.9800   |
| C610-H6B10 | 0.9800   |
| C610-H6C10 | 0.9800   |
| C710-C810  | 1.529(9) |
| C710-H7A10 | 0.9900   |
| C710-H7B10 | 0.9900   |
| C810-H8A10 | 0.9800   |
| C810-H8B10 | 0.9800   |
| C810-H8C10 | 0.9800   |
| N111-C711  | 1.510(6) |
| N111-C511  | 1.516(6) |
| N111-C111  | 1.520(7) |
| N111-C311  | 1.523(6) |
| C111-C211  | 1.526(6) |
| C111-H1A11 | 0.9900   |
| C111-H1B11 | 0.9900   |
| C211-H2A11 | 0.9800   |
| C211-H2B11 | 0.9800   |
| C211-H2C11 | 0.9800   |
| C311-C411  | 1.520(8) |
| C311-H3A11 | 0.9900   |
| C311-H3B11 | 0.9900   |
| C411-H4A11 | 0.9800   |



|            |           |
|------------|-----------|
| C411-H4B11 | 0.9800    |
| C411-H4C11 | 0.9800    |
| C511-C611  | 1.508(7)  |
| C511-H5A11 | 0.9900    |
| C511-H5B11 | 0.9900    |
| C611-H6A11 | 0.9800    |
| C611-H6B11 | 0.9800    |
| C611-H6C11 | 0.9800    |
| C711-C811  | 1.516(7)  |
| C711-H7A11 | 0.9900    |
| C711-H7B11 | 0.9900    |
| C811-H8A11 | 0.9800    |
| C811-H8B11 | 0.9800    |
| C811-H8C11 | 0.9800    |
| N112-C512  | 1.500(17) |
| N112-C112  | 1.514(17) |
| N112-C712  | 1.518(17) |
| N112-C312  | 1.519(17) |
| C112-C212  | 1.48(2)   |
| C112-H1A12 | 0.9900    |
| C112-H1B12 | 0.9900    |
| C212-H2A12 | 0.9800    |
| C212-H2B12 | 0.9800    |
| C212-H2C12 | 0.9800    |
| C312-C412  | 1.53(2)   |
| C312-H3A12 | 0.9900    |
| C312-H3B12 | 0.9900    |
| C412-H4A12 | 0.9800    |
| C412-H4B12 | 0.9800    |
| C412-H4C12 | 0.9800    |
| C512-C612  | 1.52(2)   |
| C512-H5A12 | 0.9900    |
| C512-H5B12 | 0.9900    |
| C612-H6A12 | 0.9800    |
| C612-H6B12 | 0.9800    |
| C612-H6C12 | 0.9800    |

|             |           |
|-------------|-----------|
| C712-C812   | 1.49(2)   |
| C712-H7A12  | 0.9900    |
| C712-H7B12  | 0.9900    |
| C812-H8A12  | 0.9800    |
| C812-H8B12  | 0.9800    |
| C812-H8C12  | 0.9800    |
| N1A13-C5A13 | 1.499(19) |
| N1A13-C7A13 | 1.512(19) |
| N1A13-C3A13 | 1.520(19) |
| N1A13-C1A13 | 1.53(2)   |
| C1A13-C2A13 | 1.48(2)   |
| C1A13-H1C13 | 0.9900    |
| C1A13-H1D13 | 0.9900    |
| C2A13-H2D13 | 0.9800    |
| C2A13-H2E13 | 0.9800    |
| C2A13-H2F13 | 0.9800    |
| C3A13-C4A13 | 1.52(3)   |
| C3A13-H3C13 | 0.9900    |
| C3A13-H3D13 | 0.9900    |
| C4A13-H4D13 | 0.9800    |
| C4A13-H4E13 | 0.9800    |
| C4A13-H4F13 | 0.9800    |
| C5A13-C6A13 | 1.52(2)   |
| C5A13-H5C13 | 0.9900    |
| C5A13-H5D13 | 0.9900    |
| C6A13-H6D13 | 0.9800    |
| C6A13-H6E13 | 0.9800    |
| C6A13-H6F13 | 0.9800    |
| C7A13-C8A13 | 1.48(3)   |
| C7A13-H7C13 | 0.9900    |
| C7A13-H7D13 | 0.9900    |
| C8A13-H8D13 | 0.9800    |
| C8A13-H8E13 | 0.9800    |
| C8A13-H8F13 | 0.9800    |
| N114-C314   | 1.506(15) |
| N114-C714   | 1.510(15) |

|             |           |
|-------------|-----------|
| N114-C114   | 1.518(15) |
| N114-C514   | 1.520(14) |
| C114-C214   | 1.516(17) |
| C114-H1A14  | 0.9900    |
| C114-H1B14  | 0.9900    |
| C214-H2A14  | 0.9800    |
| C214-H2B14  | 0.9800    |
| C214-H2C14  | 0.9800    |
| C314-C414   | 1.504(17) |
| C314-H3A14  | 0.9900    |
| C314-H3B14  | 0.9900    |
| C414-H4A14  | 0.9800    |
| C414-H4B14  | 0.9800    |
| C414-H4C14  | 0.9800    |
| C514-C614   | 1.527(16) |
| C514-H5A14  | 0.9900    |
| C514-H5B14  | 0.9900    |
| C614-H6A14  | 0.9800    |
| C614-H6B14  | 0.9800    |
| C614-H6C14  | 0.9800    |
| C714-C814   | 1.516(16) |
| C714-H7A14  | 0.9900    |
| C714-H7B14  | 0.9900    |
| C814-H8A14  | 0.9800    |
| C814-H8B14  | 0.9800    |
| C814-H8C14  | 0.9800    |
| N1A15-C7A15 | 1.499(16) |
| N1A15-C5A15 | 1.508(16) |
| N1A15-C3A15 | 1.508(15) |
| N1A15-C1A15 | 1.528(16) |
| C1A15-C2A15 | 1.514(18) |
| C1A15-H1C15 | 0.9900    |
| C1A15-H1D15 | 0.9900    |
| C2A15-H2D15 | 0.9800    |
| C2A15-H2E15 | 0.9800    |
| C2A15-H2F15 | 0.9800    |

|               |            |
|---------------|------------|
| C3A15-C4A15   | 1.505(18)  |
| C3A15-H3C15   | 0.9900     |
| C3A15-H3D15   | 0.9900     |
| C4A15-H4D15   | 0.9800     |
| C4A15-H4E15   | 0.9800     |
| C4A15-H4F15   | 0.9800     |
| C5A15-C6A15   | 1.528(18)  |
| C5A15-H5C15   | 0.9900     |
| C5A15-H5D15   | 0.9900     |
| C6A15-H6D15   | 0.9800     |
| C6A15-H6E15   | 0.9800     |
| C6A15-H6F15   | 0.9800     |
| C7A15-C8A15   | 1.536(18)  |
| C7A15-H7C15   | 0.9900     |
| C7A15-H7D15   | 0.9900     |
| C8A15-H8D15   | 0.9800     |
| C8A15-H8E15   | 0.9800     |
| C8A15-H8F15   | 0.9800     |
| O(1)-H(1E)    | 0.87(5)    |
| O(1)-H(1F)    | 0.86(5)    |
| O(2)-H(2G)    | 0.72(8)    |
| O(2)-H(2H)    | 0.97(7)    |
| O(3)-H(3E)    | 0.77(8)    |
| O(3)-H(3F)    | 0.77(8)    |
|               |            |
| N11-I11-C81   | 79.17(19)  |
| N11-I11-O31   | 71.40(15)  |
| C81-I11-O31   | 150.10(17) |
| N11-I11-Cl11  | 167.40(12) |
| C81-I11-Cl11  | 88.26(15)  |
| O31-I11-Cl11  | 121.01(10) |
| C131-O31-I11  | 115.1(3)   |
| C111-N11-C121 | 120.1(4)   |
| C111-N11-I11  | 117.4(3)   |
| C121-N11-I11  | 122.5(3)   |
| C21-C11-C101  | 122.4(5)   |

|                |          |
|----------------|----------|
| C21-C11-C61    | 118.9(5) |
| C101-C11-C61   | 118.7(5) |
| C31-C21-C11    | 120.6(5) |
| C31-C21-H21    | 119.7    |
| C11-C21-H21    | 119.7    |
| C21-C31-C41    | 120.7(5) |
| C21-C31-H31    | 119.6    |
| C41-C31-H31    | 119.6    |
| C51-C41-C31    | 119.9(5) |
| C51-C41-H41    | 120.0    |
| C31-C41-H41    | 120.0    |
| C41-C51-C61    | 121.0(5) |
| C41-C51-H51    | 119.5    |
| C61-C51-H51    | 119.5    |
| C51-C61-C71    | 121.3(5) |
| C51-C61-C11    | 118.9(5) |
| C71-C61-C11    | 119.8(5) |
| C81-C71-C61    | 118.5(5) |
| C81-C71-H71    | 120.7    |
| C61-C71-H71    | 120.7    |
| C71-C81-C91    | 123.0(5) |
| C71-C81-I11    | 125.7(4) |
| C91-C81-I11    | 111.3(4) |
| C101-C91-C81   | 118.6(5) |
| C101-C91-C111  | 123.0(5) |
| C81-C91-C111   | 118.0(4) |
| C91-C101-C11   | 121.3(5) |
| C91-C101-H101  | 119.3    |
| C11-C101-H101  | 119.3    |
| O21-C111-N11   | 124.2(5) |
| O21-C111-C91   | 122.7(5) |
| N11-C111-C91   | 113.1(4) |
| N11-C121-C131  | 111.1(4) |
| N11-C121-C141  | 110.0(4) |
| C131-C121-C141 | 111.4(4) |
| N11-C121-H121  | 108.1    |

|                  |            |
|------------------|------------|
| C131-C121-H121   | 108.1      |
| C141-C121-H121   | 108.1      |
| O11-C131-O31     | 125.5(5)   |
| O11-C131-C121    | 117.9(5)   |
| O31-C131-C121    | 116.5(5)   |
| C161-C141-C151   | 111.1(4)   |
| C161-C141-C121   | 112.2(5)   |
| C151-C141-C121   | 112.1(4)   |
| C161-C141-H141   | 107.0      |
| C151-C141-H141   | 107.0      |
| C121-C141-H141   | 107.0      |
| C141-C151-H15A1  | 109.5      |
| C141-C151-H15B1  | 109.5      |
| H15A1-C151-H15B1 | 109.5      |
| C141-C151-H15C1  | 109.5      |
| H15A1-C151-H15C1 | 109.5      |
| H15B1-C151-H15C1 | 109.5      |
| C141-C161-H16A1  | 109.5      |
| C141-C161-H16B1  | 109.5      |
| H16A1-C161-H16B1 | 109.5      |
| C141-C161-H16C1  | 109.5      |
| H16A1-C161-H16C1 | 109.5      |
| H16B1-C161-H16C1 | 109.5      |
| N12-I12-C82      | 79.40(18)  |
| N12-I12-O32      | 71.30(14)  |
| C82-I12-O32      | 150.20(16) |
| N12-I12-Cl12     | 167.12(12) |
| C82-I12-Cl12     | 87.84(14)  |
| O32-I12-Cl12     | 121.20(9)  |
| C132-O32-I12     | 115.1(3)   |
| C112-N12-C122    | 119.6(4)   |
| C112-N12-I12     | 117.4(3)   |
| C122-N12-I12     | 123.0(3)   |
| C102-C12-C22     | 122.1(5)   |
| C102-C12-C62     | 119.1(5)   |
| C22-C12-C62      | 118.8(5)   |

|                |          |
|----------------|----------|
| C32-C22-C12    | 120.7(5) |
| C32-C22-H22    | 119.7    |
| C12-C22-H22    | 119.7    |
| C22-C32-C42    | 120.6(5) |
| C22-C32-H32    | 119.7    |
| C42-C32-H32    | 119.7    |
| C52-C42-C32    | 120.6(5) |
| C52-C42-H42    | 119.7    |
| C32-C42-H42    | 119.7    |
| C42-C52-C62    | 120.9(5) |
| C42-C52-H52    | 119.6    |
| C62-C52-H52    | 119.6    |
| C72-C62-C52    | 121.9(5) |
| C72-C62-C12    | 119.5(5) |
| C52-C62-C12    | 118.6(5) |
| C82-C72-C62    | 118.9(5) |
| C82-C72-H72    | 120.6    |
| C62-C72-H72    | 120.6    |
| C72-C82-C92    | 123.1(5) |
| C72-C82-I12    | 126.4(4) |
| C92-C82-I12    | 110.4(3) |
| C102-C92-C82   | 118.7(5) |
| C102-C92-C112  | 121.7(5) |
| C82-C92-C112   | 119.3(4) |
| C92-C102-C12   | 120.5(5) |
| C92-C102-H102  | 119.7    |
| C12-C102-H102  | 119.7    |
| O22-C112-N12   | 124.2(5) |
| O22-C112-C92   | 123.5(5) |
| N12-C112-C92   | 112.2(4) |
| N12-C122-C132  | 111.1(4) |
| N12-C122-C142  | 109.9(4) |
| C132-C122-C142 | 111.0(4) |
| N12-C122-H122  | 108.2    |
| C132-C122-H122 | 108.2    |
| C142-C122-H122 | 108.2    |

|                  |            |
|------------------|------------|
| O12-C132-O32     | 125.6(5)   |
| O12-C132-C122    | 117.7(5)   |
| O32-C132-C122    | 116.7(5)   |
| C152-C142-C162   | 111.1(5)   |
| C152-C142-C122   | 111.8(4)   |
| C162-C142-C122   | 112.1(4)   |
| C152-C142-H142   | 107.2      |
| C162-C142-H142   | 107.2      |
| C122-C142-H142   | 107.2      |
| C142-C152-H15A2  | 109.5      |
| C142-C152-H15B2  | 109.5      |
| H15A2-C152-H15B2 | 109.5      |
| C142-C152-H15C2  | 109.5      |
| H15A2-C152-H15C2 | 109.5      |
| H15B2-C152-H15C2 | 109.5      |
| C142-C162-H16A2  | 109.5      |
| C142-C162-H16B2  | 109.5      |
| H16A2-C162-H16B2 | 109.5      |
| C142-C162-H16C2  | 109.5      |
| H16A2-C162-H16C2 | 109.5      |
| H16B2-C162-H16C2 | 109.5      |
| N13-I13-C83      | 79.53(18)  |
| N13-I13-Cl13     | 167.42(12) |
| C83-I13-Cl13     | 87.94(14)  |
| C113-N13-C123    | 120.4(4)   |
| C113-N13-I13     | 116.4(3)   |
| C123-N13-I13     | 123.0(3)   |
| C103-C13-C23     | 122.4(5)   |
| C103-C13-C63     | 119.1(5)   |
| C23-C13-C63      | 118.5(5)   |
| C33-C23-C13      | 120.9(5)   |
| C33-C23-H23      | 119.6      |
| C13-C23-H23      | 119.6      |
| C23-C33-C43      | 120.4(5)   |
| C23-C33-H33      | 119.8      |
| C43-C33-H33      | 119.8      |



|                |          |
|----------------|----------|
| C53-C43-C33    | 120.4(5) |
| C53-C43-H43    | 119.8    |
| C33-C43-H43    | 119.8    |
| C43-C53-C63    | 120.8(5) |
| C43-C53-H53    | 119.6    |
| C63-C53-H53    | 119.6    |
| C53-C63-C73    | 121.5(5) |
| C53-C63-C13    | 119.0(5) |
| C73-C63-C13    | 119.6(5) |
| C83-C73-C63    | 118.7(5) |
| C83-C73-H73    | 120.6    |
| C63-C73-H73    | 120.6    |
| C73-C83-C93    | 122.7(5) |
| C73-C83-I13    | 126.0(4) |
| C93-C83-I13    | 111.3(3) |
| C103-C93-C83   | 119.5(5) |
| C103-C93-C113  | 122.2(4) |
| C83-C93-C113   | 118.2(4) |
| C93-C103-C13   | 120.4(5) |
| C93-C103-H103  | 119.8    |
| C13-C103-H103  | 119.8    |
| O23-C113-N13   | 123.8(5) |
| O23-C113-C93   | 123.0(5) |
| N13-C113-C93   | 113.0(4) |
| N13-C123-C133  | 112.4(4) |
| N13-C123-C143  | 109.0(4) |
| C133-C123-C143 | 111.5(4) |
| N13-C123-H123  | 107.9    |
| C133-C123-H123 | 107.9    |
| C143-C123-H123 | 107.9    |
| O13-C133-O33   | 125.4(5) |
| O13-C133-C123  | 118.0(5) |
| O33-C133-C123  | 116.6(5) |
| C153-C143-C163 | 110.5(5) |
| C153-C143-C123 | 111.5(4) |
| C163-C143-C123 | 113.2(5) |

|                  |            |
|------------------|------------|
| C153-C143-H143   | 107.1      |
| C163-C143-H143   | 107.1      |
| C123-C143-H143   | 107.1      |
| C143-C153-H15A3  | 109.5      |
| C143-C153-H15B3  | 109.5      |
| H15A3-C153-H15B3 | 109.5      |
| C143-C153-H15C3  | 109.5      |
| H15A3-C153-H15C3 | 109.5      |
| H15B3-C153-H15C3 | 109.5      |
| C143-C163-H16A3  | 109.5      |
| C143-C163-H16B3  | 109.5      |
| H16A3-C163-H16B3 | 109.5      |
| C143-C163-H16C3  | 109.5      |
| H16A3-C163-H16C3 | 109.5      |
| H16B3-C163-H16C3 | 109.5      |
| N14-I14-C84      | 79.18(18)  |
| N14-I14-O34      | 71.08(15)  |
| C84-I14-O34      | 150.12(16) |
| N14-I14-Cl14     | 167.20(12) |
| C84-I14-Cl14     | 88.09(14)  |
| O34-I14-Cl14     | 121.54(10) |
| C134-O34-I14     | 114.9(3)   |
| C114-N14-C124    | 120.5(4)   |
| C114-N14-I14     | 116.5(3)   |
| C124-N14-I14     | 123.0(3)   |
| C104-C14-C24     | 122.4(5)   |
| C104-C14-C64     | 118.9(5)   |
| C24-C14-C64      | 118.7(5)   |
| C34-C24-C14      | 120.5(5)   |
| C34-C24-H24      | 119.7      |
| C14-C24-H24      | 119.7      |
| C24-C34-C44      | 120.9(5)   |
| C24-C34-H34      | 119.5      |
| C44-C34-H34      | 119.5      |
| C54-C44-C34      | 120.3(5)   |
| C54-C44-H44      | 119.9      |

|                |          |
|----------------|----------|
| C34-C44-H44    | 119.9    |
| C44-C54-C64    | 120.3(5) |
| C44-C54-H54    | 119.8    |
| C64-C54-H54    | 119.8    |
| C54-C64-C14    | 119.2(5) |
| C54-C64-C74    | 120.8(5) |
| C14-C64-C74    | 120.0(5) |
| C84-C74-C64    | 118.0(5) |
| C84-C74-H74    | 121.0    |
| C64-C74-H74    | 121.0    |
| C74-C84-C94    | 123.4(5) |
| C74-C84-I14    | 125.3(4) |
| C94-C84-I14    | 111.3(3) |
| C104-C94-C84   | 118.9(5) |
| C104-C94-C114  | 122.4(4) |
| C84-C94-C114   | 118.5(4) |
| C94-C104-C14   | 120.9(5) |
| C94-C104-H104  | 119.6    |
| C14-C104-H104  | 119.6    |
| O24-C114-N14   | 123.1(5) |
| O24-C114-C94   | 123.6(5) |
| N14-C114-C94   | 113.2(4) |
| N14-C124-C134  | 112.0(4) |
| N14-C124-C144  | 108.9(4) |
| C134-C124-C144 | 111.6(4) |
| N14-C124-H124  | 108.0    |
| C134-C124-H124 | 108.0    |
| C144-C124-H124 | 108.0    |
| O14-C134-O34   | 125.3(5) |
| O14-C134-C124  | 118.1(5) |
| O34-C134-C124  | 116.6(5) |
| C154-C144-C164 | 111.1(4) |
| C154-C144-C124 | 112.0(4) |
| C164-C144-C124 | 111.8(4) |
| C154-C144-H144 | 107.2    |
| C164-C144-H144 | 107.2    |

|                  |            |
|------------------|------------|
| C124-C144-H144   | 107.2      |
| C144-C154-H15A4  | 109.5      |
| C144-C154-H15B4  | 109.5      |
| H15A4-C154-H15B4 | 109.5      |
| C144-C154-H15C4  | 109.5      |
| H15A4-C154-H15C4 | 109.5      |
| H15B4-C154-H15C4 | 109.5      |
| C144-C164-H16A4  | 109.5      |
| C144-C164-H16B4  | 109.5      |
| H16A4-C164-H16B4 | 109.5      |
| C144-C164-H16C4  | 109.5      |
| H16A4-C164-H16C4 | 109.5      |
| H16B4-C164-H16C4 | 109.5      |
| N15-I15-C85      | 79.53(18)  |
| N15-I15-O35      | 71.67(15)  |
| C85-I15-O35      | 150.98(16) |
| N15-I15-Cl15     | 167.30(12) |
| C85-I15-Cl15     | 87.84(14)  |
| O35-I15-Cl15     | 120.85(10) |
| C135-O35-I15     | 114.0(3)   |
| C115-N15-C125    | 121.0(4)   |
| C115-N15-I15     | 116.8(3)   |
| C125-N15-I15     | 122.2(3)   |
| C105-C15-C25     | 122.3(5)   |
| C105-C15-C65     | 119.1(5)   |
| C25-C15-C65      | 118.6(5)   |
| C35-C25-C15      | 120.6(5)   |
| C35-C25-H25      | 119.7      |
| C15-C25-H25      | 119.7      |
| C25-C35-C45      | 120.6(5)   |
| C25-C35-H35      | 119.7      |
| C45-C35-H35      | 119.7      |
| C55-C45-C35      | 120.3(5)   |
| C55-C45-H45      | 119.8      |
| C35-C45-H45      | 119.8      |
| C45-C55-C65      | 120.4(5)   |

|                 |          |
|-----------------|----------|
| C45-C55-H55     | 119.8    |
| C65-C55-H55     | 119.8    |
| C55-C65-C15     | 119.4(5) |
| C55-C65-C75     | 121.2(5) |
| C15-C65-C75     | 119.4(5) |
| C85-C75-C65     | 118.8(5) |
| C85-C75-H75     | 120.6    |
| C65-C75-H75     | 120.6    |
| C75-C85-C95     | 122.8(5) |
| C75-C85-I15     | 126.0(4) |
| C95-C85-I15     | 111.2(4) |
| C105-C95-C85    | 119.3(5) |
| C105-C95-C115   | 122.2(4) |
| C85-C95-C115    | 118.4(4) |
| C95-C105-C15    | 120.5(5) |
| C95-C105-H105   | 119.7    |
| C15-C105-H105   | 119.7    |
| O25-C115-N15    | 123.9(5) |
| O25-C115-C95    | 122.9(5) |
| N15-C115-C95    | 113.1(4) |
| N15-C125-C135   | 111.6(4) |
| N15-C125-C145   | 108.8(4) |
| C135-C125-C145  | 112.5(4) |
| N15-C125-H125   | 107.9    |
| C135-C125-H125  | 107.9    |
| C145-C125-H125  | 107.9    |
| O15-C135-O35    | 125.0(5) |
| O15-C135-C125   | 117.6(5) |
| O35-C135-C125   | 117.4(5) |
| C155-C145-C165  | 110.8(5) |
| C155-C145-C125  | 112.8(5) |
| C165-C145-C125  | 111.2(5) |
| C155-C145-H145  | 107.2    |
| C165-C145-H145  | 107.2    |
| C125-C145-H145  | 107.2    |
| C145-C155-H15A5 | 109.5    |

|                  |            |
|------------------|------------|
| C145-C155-H15B5  | 109.5      |
| H15A5-C155-H15B5 | 109.5      |
| C145-C155-H15C5  | 109.5      |
| H15A5-C155-H15C5 | 109.5      |
| H15B5-C155-H15C5 | 109.5      |
| C145-C165-H16A5  | 109.5      |
| C145-C165-H16B5  | 109.5      |
| H16A5-C165-H16B5 | 109.5      |
| C145-C165-H16C5  | 109.5      |
| H16A5-C165-H16C5 | 109.5      |
| H16B5-C165-H16C5 | 109.5      |
| N16-I16-C86      | 79.07(18)  |
| N16-I16-Cl16     | 167.50(12) |
| C86-I16-Cl16     | 88.49(14)  |
| C116-N16-C126    | 120.1(4)   |
| C116-N16-I16     | 116.6(3)   |
| C126-N16-I16     | 123.1(3)   |
| C26-C16-C106     | 122.1(5)   |
| C26-C16-C66      | 118.9(5)   |
| C106-C16-C66     | 119.0(5)   |
| C36-C26-C16      | 120.5(5)   |
| C36-C26-H26      | 119.7      |
| C16-C26-H26      | 119.7      |
| C26-C36-C46      | 120.7(5)   |
| C26-C36-H36      | 119.6      |
| C46-C36-H36      | 119.6      |
| C56-C46-C36      | 120.3(5)   |
| C56-C46-H46      | 119.8      |
| C36-C46-H46      | 119.8      |
| C46-C56-C66      | 120.4(5)   |
| C46-C56-H56      | 119.8      |
| C66-C56-H56      | 119.8      |
| C56-C66-C16      | 119.1(5)   |
| C56-C66-C76      | 121.2(5)   |
| C16-C66-C76      | 119.8(5)   |
| C86-C76-C66      | 118.2(5)   |

|                  |          |
|------------------|----------|
| C86-C76-H76      | 120.9    |
| C66-C76-H76      | 120.9    |
| C76-C86-C96      | 123.3(5) |
| C76-C86-I16      | 125.4(4) |
| C96-C86-I16      | 111.3(4) |
| C106-C96-C86     | 119.2(5) |
| C106-C96-C116    | 122.1(4) |
| C86-C96-C116     | 118.5(4) |
| C96-C106-C16     | 120.6(5) |
| C96-C106-H106    | 119.7    |
| C16-C106-H106    | 119.7    |
| O26-C116-N16     | 124.5(5) |
| O26-C116-C96     | 122.6(5) |
| N16-C116-C96     | 112.8(4) |
| N16-C126-C136    | 111.9(5) |
| N16-C126-C146    | 109.1(4) |
| C136-C126-C146   | 112.2(4) |
| N16-C126-H126    | 107.8    |
| C136-C126-H126   | 107.8    |
| C146-C126-H126   | 107.8    |
| O16-C136-O36     | 125.1(6) |
| O16-C136-C126    | 118.1(5) |
| O36-C136-C126    | 116.8(5) |
| C156-C146-C166   | 111.1(5) |
| C156-C146-C126   | 112.7(5) |
| C166-C146-C126   | 111.0(5) |
| C156-C146-H146   | 107.3    |
| C166-C146-H146   | 107.3    |
| C126-C146-H146   | 107.3    |
| C146-C156-H15A6  | 109.5    |
| C146-C156-H15B6  | 109.5    |
| H15A6-C156-H15B6 | 109.5    |
| C146-C156-H15C6  | 109.5    |
| H15A6-C156-H15C6 | 109.5    |
| H15B6-C156-H15C6 | 109.5    |
| C146-C166-H16A6  | 109.5    |

|                  |          |
|------------------|----------|
| C146-C166-H16B6  | 109.5    |
| H16A6-C166-H16B6 | 109.5    |
| C146-C166-H16C6  | 109.5    |
| H16A6-C166-H16C6 | 109.5    |
| H16B6-C166-H16C6 | 109.5    |
| C37-N17-C77      | 110.7(7) |
| C37-N17-C57      | 111.0(6) |
| C77-N17-C57      | 106.3(9) |
| C37-N17-C17      | 107.1(9) |
| C77-N17-C17      | 110.6(7) |
| C57-N17-C17      | 111.2(7) |
| N17-C17-C27      | 114.1(9) |
| N17-C17-H1A7     | 108.7    |
| C27-C17-H1A7     | 108.7    |
| N17-C17-H1B7     | 108.7    |
| C27-C17-H1B7     | 108.7    |
| H1A7-C17-H1B7    | 107.6    |
| C17-C27-H2A7     | 109.5    |
| C17-C27-H2B7     | 109.5    |
| H2A7-C27-H2B7    | 109.5    |
| C17-C27-H2C7     | 109.5    |
| H2A7-C27-H2C7    | 109.5    |
| H2B7-C27-H2C7    | 109.5    |
| C47-C37-N17      | 115.8(8) |
| C47-C37-H3A7     | 108.3    |
| N17-C37-H3A7     | 108.3    |
| C47-C37-H3B7     | 108.3    |
| N17-C37-H3B7     | 108.3    |
| H3A7-C37-H3B7    | 107.4    |
| C37-C47-H4A7     | 109.5    |
| C37-C47-H4B7     | 109.5    |
| H4A7-C47-H4B7    | 109.5    |
| C37-C47-H4C7     | 109.5    |
| H4A7-C47-H4C7    | 109.5    |
| H4B7-C47-H4C7    | 109.5    |
| N17-C57-C67      | 113.1(7) |



|                |          |
|----------------|----------|
| N17-C57-H5A7   | 109.0    |
| C67-C57-H5A7   | 109.0    |
| N17-C57-H5B7   | 109.0    |
| C67-C57-H5B7   | 109.0    |
| H5A7-C57-H5B7  | 107.8    |
| C57-C67-H6A7   | 109.5    |
| C57-C67-H6B7   | 109.5    |
| H6A7-C67-H6B7  | 109.5    |
| C57-C67-H6C7   | 109.5    |
| H6A7-C67-H6C7  | 109.5    |
| H6B7-C67-H6C7  | 109.5    |
| N17-C77-C87    | 115.3(8) |
| N17-C77-H7A7   | 108.4    |
| C87-C77-H7A7   | 108.4    |
| N17-C77-H7B7   | 108.4    |
| C87-C77-H7B7   | 108.4    |
| H7A7-C77-H7B7  | 107.5    |
| C77-C87-H8A7   | 109.5    |
| C77-C87-H8B7   | 109.5    |
| H8A7-C87-H8B7  | 109.5    |
| C77-C87-H8C7   | 109.5    |
| H8A7-C87-H8C7  | 109.5    |
| H8B7-C87-H8C7  | 109.5    |
| C3A8-N1A8-C7A8 | 111(2)   |
| C3A8-N1A8-C5A8 | 112(2)   |
| C7A8-N1A8-C5A8 | 106(3)   |
| C3A8-N1A8-C1A8 | 109(3)   |
| C7A8-N1A8-C1A8 | 108(2)   |
| C5A8-N1A8-C1A8 | 110(2)   |
| N1A8-C1A8-C2A8 | 110(3)   |
| N1A8-C1A8-H1C8 | 109.7    |
| C2A8-C1A8-H1C8 | 109.7    |
| N1A8-C1A8-H1D8 | 109.7    |
| C2A8-C1A8-H1D8 | 109.7    |
| H1C8-C1A8-H1D8 | 108.2    |
| C1A8-C2A8-H2D8 | 109.5    |

|                |        |
|----------------|--------|
| C1A8-C2A8-H2E8 | 109.5  |
| H2D8-C2A8-H2E8 | 109.5  |
| C1A8-C2A8-H2F8 | 109.5  |
| H2D8-C2A8-H2F8 | 109.5  |
| H2E8-C2A8-H2F8 | 109.5  |
| N1A8-C3A8-C4A8 | 113(3) |
| N1A8-C3A8-H3C8 | 109.0  |
| C4A8-C3A8-H3C8 | 109.0  |
| N1A8-C3A8-H3D8 | 109.0  |
| C4A8-C3A8-H3D8 | 109.0  |
| H3C8-C3A8-H3D8 | 107.8  |
| C3A8-C4A8-H4D8 | 109.5  |
| C3A8-C4A8-H4E8 | 109.5  |
| H4D8-C4A8-H4E8 | 109.5  |
| C3A8-C4A8-H4F8 | 109.5  |
| H4D8-C4A8-H4F8 | 109.5  |
| H4E8-C4A8-H4F8 | 109.5  |
| N1A8-C5A8-C6A8 | 118(3) |
| N1A8-C5A8-H5C8 | 107.8  |
| C6A8-C5A8-H5C8 | 107.8  |
| N1A8-C5A8-H5D8 | 107.8  |
| C6A8-C5A8-H5D8 | 107.8  |
| H5C8-C5A8-H5D8 | 107.1  |
| C5A8-C6A8-H6D8 | 109.5  |
| C5A8-C6A8-H6E8 | 109.5  |
| H6D8-C6A8-H6E8 | 109.5  |
| C5A8-C6A8-H6F8 | 109.5  |
| H6D8-C6A8-H6F8 | 109.5  |
| H6E8-C6A8-H6F8 | 109.5  |
| C8A8-C7A8-N1A8 | 118(3) |
| C8A8-C7A8-H7C8 | 107.7  |
| N1A8-C7A8-H7C8 | 107.7  |
| C8A8-C7A8-H7D8 | 107.7  |
| N1A8-C7A8-H7D8 | 107.7  |
| H7C8-C7A8-H7D8 | 107.1  |
| C7A8-C8A8-H8D8 | 109.5  |

|                |          |
|----------------|----------|
| C7A8-C8A8-H8E8 | 109.5    |
| H8D8-C8A8-H8E8 | 109.5    |
| C7A8-C8A8-H8F8 | 109.5    |
| H8D8-C8A8-H8F8 | 109.5    |
| H8E8-C8A8-H8F8 | 109.5    |
| C19-N19-C39    | 110.6(4) |
| C19-N19-C59    | 110.2(4) |
| C39-N19-C59    | 107.6(4) |
| C19-N19-C79    | 107.5(4) |
| C39-N19-C79    | 109.3(4) |
| C59-N19-C79    | 111.6(4) |
| N19-C19-C29    | 115.1(5) |
| N19-C19-H1A9   | 108.5    |
| C29-C19-H1A9   | 108.5    |
| N19-C19-H1B9   | 108.5    |
| C29-C19-H1B9   | 108.5    |
| H1A9-C19-H1B9  | 107.5    |
| C19-C29-H2A9   | 109.5    |
| C19-C29-H2B9   | 109.5    |
| H2A9-C29-H2B9  | 109.5    |
| C19-C29-H2C9   | 109.5    |
| H2A9-C29-H2C9  | 109.5    |
| H2B9-C29-H2C9  | 109.5    |
| N19-C39-C49    | 115.0(5) |
| N19-C39-H3A9   | 108.5    |
| C49-C39-H3A9   | 108.5    |
| N19-C39-H3B9   | 108.5    |
| C49-C39-H3B9   | 108.5    |
| H3A9-C39-H3B9  | 107.5    |
| C39-C49-H4A9   | 109.5    |
| C39-C49-H4B9   | 109.5    |
| H4A9-C49-H4B9  | 109.5    |
| C39-C49-H4C9   | 109.5    |
| H4A9-C49-H4C9  | 109.5    |
| H4B9-C49-H4C9  | 109.5    |
| C69-C59-N19    | 115.2(5) |

|                  |          |
|------------------|----------|
| C69-C59-H5A9     | 108.5    |
| N19-C59-H5A9     | 108.5    |
| C69-C59-H5B9     | 108.5    |
| N19-C59-H5B9     | 108.5    |
| H5A9-C59-H5B9    | 107.5    |
| C59-C69-H6A9     | 109.5    |
| C59-C69-H6B9     | 109.5    |
| H6A9-C69-H6B9    | 109.5    |
| C59-C69-H6C9     | 109.5    |
| H6A9-C69-H6C9    | 109.5    |
| H6B9-C69-H6C9    | 109.5    |
| C89-C79-N19      | 115.6(4) |
| C89-C79-H7A9     | 108.4    |
| N19-C79-H7A9     | 108.4    |
| C89-C79-H7B9     | 108.4    |
| N19-C79-H7B9     | 108.4    |
| H7A9-C79-H7B9    | 107.4    |
| C79-C89-H8A9     | 109.5    |
| C79-C89-H8B9     | 109.5    |
| H8A9-C89-H8B9    | 109.5    |
| C79-C89-H8C9     | 109.5    |
| H8A9-C89-H8C9    | 109.5    |
| H8B9-C89-H8C9    | 109.5    |
| C310-N110-C510   | 111.9(4) |
| C310-N110-C110   | 112.0(4) |
| C510-N110-C110   | 106.6(4) |
| C310-N110-C710   | 105.6(4) |
| C510-N110-C710   | 110.0(4) |
| C110-N110-C710   | 110.8(4) |
| N110-C110-C210   | 114.9(5) |
| N110-C110-H1A10  | 108.5    |
| C210-C110-H1A10  | 108.5    |
| N110-C110-H1B10  | 108.5    |
| C210-C110-H1B10  | 108.5    |
| H1A10-C110-H1B10 | 107.5    |
| C110-C210-H2A10  | 109.5    |

|                  |          |
|------------------|----------|
| C110-C210-H2B10  | 109.5    |
| H2A10-C210-H2B10 | 109.5    |
| C110-C210-H2C10  | 109.5    |
| H2A10-C210-H2C10 | 109.5    |
| H2B10-C210-H2C10 | 109.5    |
| N110-C310-C410   | 114.6(5) |
| N110-C310-H3A10  | 108.6    |
| C410-C310-H3A10  | 108.6    |
| N110-C310-H3B10  | 108.6    |
| C410-C310-H3B10  | 108.6    |
| H3A10-C310-H3B10 | 107.6    |
| C310-C410-H4A10  | 109.5    |
| C310-C410-H4B10  | 109.5    |
| H4A10-C410-H4B10 | 109.5    |
| C310-C410-H4C10  | 109.5    |
| H4A10-C410-H4C10 | 109.5    |
| H4B10-C410-H4C10 | 109.5    |
| N110-C510-C610   | 114.3(5) |
| N110-C510-H5A10  | 108.7    |
| C610-C510-H5A10  | 108.7    |
| N110-C510-H5B10  | 108.7    |
| C610-C510-H5B10  | 108.7    |
| H5A10-C510-H5B10 | 107.6    |
| C510-C610-H6A10  | 109.5    |
| C510-C610-H6B10  | 109.5    |
| H6A10-C610-H6B10 | 109.5    |
| C510-C610-H6C10  | 109.5    |
| H6A10-C610-H6C10 | 109.5    |
| H6B10-C610-H6C10 | 109.5    |
| C810-C710-N110   | 114.2(5) |
| C810-C710-H7A10  | 108.7    |
| N110-C710-H7A10  | 108.7    |
| C810-C710-H7B10  | 108.7    |
| N110-C710-H7B10  | 108.7    |
| H7A10-C710-H7B10 | 107.6    |
| C710-C810-H8A10  | 109.5    |

|                  |          |
|------------------|----------|
| C710-C810-H8B10  | 109.5    |
| H8A10-C810-H8B10 | 109.5    |
| C710-C810-H8C10  | 109.5    |
| H8A10-C810-H8C10 | 109.5    |
| H8B10-C810-H8C10 | 109.5    |
| C711-N111-C511   | 111.5(4) |
| C711-N111-C111   | 107.7(4) |
| C511-N111-C111   | 109.6(4) |
| C711-N111-C311   | 109.0(4) |
| C511-N111-C311   | 107.6(4) |
| C111-N111-C311   | 111.5(4) |
| N111-C111-C211   | 115.5(4) |
| N111-C111-H1A11  | 108.4    |
| C211-C111-H1A11  | 108.4    |
| N111-C111-H1B11  | 108.4    |
| C211-C111-H1B11  | 108.4    |
| H1A11-C111-H1B11 | 107.5    |
| C111-C211-H2A11  | 109.5    |
| C111-C211-H2B11  | 109.5    |
| H2A11-C211-H2B11 | 109.5    |
| C111-C211-H2C11  | 109.5    |
| H2A11-C211-H2C11 | 109.5    |
| H2B11-C211-H2C11 | 109.5    |
| C411-C311-N111   | 115.2(4) |
| C411-C311-H3A11  | 108.5    |
| N111-C311-H3A11  | 108.5    |
| C411-C311-H3B11  | 108.5    |
| N111-C311-H3B11  | 108.5    |
| H3A11-C311-H3B11 | 107.5    |
| C311-C411-H4A11  | 109.5    |
| C311-C411-H4B11  | 109.5    |
| H4A11-C411-H4B11 | 109.5    |
| C311-C411-H4C11  | 109.5    |
| H4A11-C411-H4C11 | 109.5    |
| H4B11-C411-H4C11 | 109.5    |
| C611-C511-N111   | 114.6(4) |

|                  |           |
|------------------|-----------|
| C611-C511-H5A11  | 108.6     |
| N111-C511-H5A11  | 108.6     |
| C611-C511-H5B11  | 108.6     |
| N111-C511-H5B11  | 108.6     |
| H5A11-C511-H5B11 | 107.6     |
| C511-C611-H6A11  | 109.5     |
| C511-C611-H6B11  | 109.5     |
| H6A11-C611-H6B11 | 109.5     |
| C511-C611-H6C11  | 109.5     |
| H6A11-C611-H6C11 | 109.5     |
| H6B11-C611-H6C11 | 109.5     |
| N111-C711-C811   | 115.1(5)  |
| N111-C711-H7A11  | 108.5     |
| C811-C711-H7A11  | 108.5     |
| N111-C711-H7B11  | 108.5     |
| C811-C711-H7B11  | 108.5     |
| H7A11-C711-H7B11 | 107.5     |
| C711-C811-H8A11  | 109.5     |
| C711-C811-H8B11  | 109.5     |
| H8A11-C811-H8B11 | 109.5     |
| C711-C811-H8C11  | 109.5     |
| H8A11-C811-H8C11 | 109.5     |
| H8B11-C811-H8C11 | 109.5     |
| C512-N112-C112   | 111.8(12) |
| C512-N112-C712   | 109.9(12) |
| C112-N112-C712   | 108.6(10) |
| C512-N112-C312   | 106.7(10) |
| C112-N112-C312   | 109.4(12) |
| C712-N112-C312   | 110.4(12) |
| C212-C112-N112   | 117.3(14) |
| C212-C112-H1A12  | 108.0     |
| N112-C112-H1A12  | 108.0     |
| C212-C112-H1B12  | 108.0     |
| N112-C112-H1B12  | 108.0     |
| H1A12-C112-H1B12 | 107.2     |
| C112-C212-H2A12  | 109.5     |

|                  |           |
|------------------|-----------|
| C112-C212-H2B12  | 109.5     |
| H2A12-C212-H2B12 | 109.5     |
| C112-C212-H2C12  | 109.5     |
| H2A12-C212-H2C12 | 109.5     |
| H2B12-C212-H2C12 | 109.5     |
| N112-C312-C412   | 114.7(11) |
| N112-C312-H3A12  | 108.6     |
| C412-C312-H3A12  | 108.6     |
| N112-C312-H3B12  | 108.6     |
| C412-C312-H3B12  | 108.6     |
| H3A12-C312-H3B12 | 107.6     |
| C312-C412-H4A12  | 109.5     |
| C312-C412-H4B12  | 109.5     |
| H4A12-C412-H4B12 | 109.5     |
| C312-C412-H4C12  | 109.5     |
| H4A12-C412-H4C12 | 109.5     |
| H4B12-C412-H4C12 | 109.5     |
| N112-C512-C612   | 115.5(11) |
| N112-C512-H5A12  | 108.4     |
| C612-C512-H5A12  | 108.4     |
| N112-C512-H5B12  | 108.4     |
| C612-C512-H5B12  | 108.4     |
| H5A12-C512-H5B12 | 107.5     |
| C512-C612-H6A12  | 109.5     |
| C512-C612-H6B12  | 109.5     |
| H6A12-C612-H6B12 | 109.5     |
| C512-C612-H6C12  | 109.5     |
| H6A12-C612-H6C12 | 109.5     |
| H6B12-C612-H6C12 | 109.5     |
| C812-C712-N112   | 116.1(11) |
| C812-C712-H7A12  | 108.3     |
| N112-C712-H7A12  | 108.3     |
| C812-C712-H7B12  | 108.3     |
| N112-C712-H7B12  | 108.3     |
| H7A12-C712-H7B12 | 107.4     |
| C712-C812-H8A12  | 109.5     |



|                   |           |
|-------------------|-----------|
| C712-C812-H8B12   | 109.5     |
| H8A12-C812-H8B12  | 109.5     |
| C712-C812-H8C12   | 109.5     |
| H8A12-C812-H8C12  | 109.5     |
| H8B12-C812-H8C12  | 109.5     |
| C5A13-N1A13-C7A13 | 111.7(14) |
| C5A13-N1A13-C3A13 | 107.6(12) |
| C7A13-N1A13-C3A13 | 111.6(14) |
| C5A13-N1A13-C1A13 | 109.8(14) |
| C7A13-N1A13-C1A13 | 106.4(12) |
| C3A13-N1A13-C1A13 | 109.7(14) |
| C2A13-C1A13-N1A13 | 116.9(13) |
| C2A13-C1A13-H1C13 | 108.1     |
| N1A13-C1A13-H1C13 | 108.1     |
| C2A13-C1A13-H1D13 | 108.1     |
| N1A13-C1A13-H1D13 | 108.1     |
| H1C13-C1A13-H1D13 | 107.3     |
| C1A13-C2A13-H2D13 | 109.5     |
| C1A13-C2A13-H2E13 | 109.5     |
| H2D13-C2A13-H2E13 | 109.5     |
| C1A13-C2A13-H2F13 | 109.5     |
| H2D13-C2A13-H2F13 | 109.5     |
| H2E13-C2A13-H2F13 | 109.5     |
| C4A13-C3A13-N1A13 | 117.5(17) |
| C4A13-C3A13-H3C13 | 107.9     |
| N1A13-C3A13-H3C13 | 107.9     |
| C4A13-C3A13-H3D13 | 107.9     |
| N1A13-C3A13-H3D13 | 107.9     |
| H3C13-C3A13-H3D13 | 107.2     |
| C3A13-C4A13-H4D13 | 109.5     |
| C3A13-C4A13-H4E13 | 109.5     |
| H4D13-C4A13-H4E13 | 109.5     |
| C3A13-C4A13-H4F13 | 109.5     |
| H4D13-C4A13-H4F13 | 109.5     |
| H4E13-C4A13-H4F13 | 109.5     |
| N1A13-C5A13-C6A13 | 115.1(13) |

|                   |           |
|-------------------|-----------|
| N1A13-C5A13-H5C13 | 108.5     |
| C6A13-C5A13-H5C13 | 108.5     |
| N1A13-C5A13-H5D13 | 108.5     |
| C6A13-C5A13-H5D13 | 108.5     |
| H5C13-C5A13-H5D13 | 107.5     |
| C5A13-C6A13-H6D13 | 109.5     |
| C5A13-C6A13-H6E13 | 109.5     |
| H6D13-C6A13-H6E13 | 109.5     |
| C5A13-C6A13-H6F13 | 109.5     |
| H6D13-C6A13-H6F13 | 109.5     |
| H6E13-C6A13-H6F13 | 109.5     |
| C8A13-C7A13-N1A13 | 117.7(14) |
| C8A13-C7A13-H7C13 | 107.9     |
| N1A13-C7A13-H7C13 | 107.9     |
| C8A13-C7A13-H7D13 | 107.9     |
| N1A13-C7A13-H7D13 | 107.9     |
| H7C13-C7A13-H7D13 | 107.2     |
| C7A13-C8A13-H8D13 | 109.5     |
| C7A13-C8A13-H8E13 | 109.5     |
| H8D13-C8A13-H8E13 | 109.5     |
| C7A13-C8A13-H8F13 | 109.5     |
| H8D13-C8A13-H8F13 | 109.5     |
| H8E13-C8A13-H8F13 | 109.5     |
| C314-N114-C714    | 110.7(15) |
| C314-N114-C114    | 114.3(14) |
| C714-N114-C114    | 106.4(12) |
| C314-N114-C514    | 105.9(13) |
| C714-N114-C514    | 108.5(14) |
| C114-N114-C514    | 110.9(15) |
| C214-C114-N114    | 114.8(14) |
| C214-C114-H1A14   | 108.6     |
| N114-C114-H1A14   | 108.6     |
| C214-C114-H1B14   | 108.6     |
| N114-C114-H1B14   | 108.6     |
| H1A14-C114-H1B14  | 107.5     |
| C114-C214-H2A14   | 109.5     |

|                  |           |
|------------------|-----------|
| C114-C214-H2B14  | 109.5     |
| H2A14-C214-H2B14 | 109.5     |
| C114-C214-H2C14  | 109.5     |
| H2A14-C214-H2C14 | 109.5     |
| H2B14-C214-H2C14 | 109.5     |
| C414-C314-N114   | 116.0(18) |
| C414-C314-H3A14  | 108.3     |
| N114-C314-H3A14  | 108.3     |
| C414-C314-H3B14  | 108.3     |
| N114-C314-H3B14  | 108.3     |
| H3A14-C314-H3B14 | 107.4     |
| C314-C414-H4A14  | 109.5     |
| C314-C414-H4B14  | 109.5     |
| H4A14-C414-H4B14 | 109.5     |
| C314-C414-H4C14  | 109.5     |
| H4A14-C414-H4C14 | 109.5     |
| H4B14-C414-H4C14 | 109.5     |
| N114-C514-C614   | 115.1(16) |
| N114-C514-H5A14  | 108.5     |
| C614-C514-H5A14  | 108.5     |
| N114-C514-H5B14  | 108.5     |
| C614-C514-H5B14  | 108.5     |
| H5A14-C514-H5B14 | 107.5     |
| C514-C614-H6A14  | 109.5     |
| C514-C614-H6B14  | 109.5     |
| H6A14-C614-H6B14 | 109.5     |
| C514-C614-H6C14  | 109.5     |
| H6A14-C614-H6C14 | 109.5     |
| H6B14-C614-H6C14 | 109.5     |
| N114-C714-C814   | 115.1(13) |
| N114-C714-H7A14  | 108.5     |
| C814-C714-H7A14  | 108.5     |
| N114-C714-H7B14  | 108.5     |
| C814-C714-H7B14  | 108.5     |
| H7A14-C714-H7B14 | 107.5     |
| C714-C814-H8A14  | 109.5     |

|                   |           |
|-------------------|-----------|
| C714-C814-H8B14   | 109.5     |
| H8A14-C814-H8B14  | 109.5     |
| C714-C814-H8C14   | 109.5     |
| H8A14-C814-H8C14  | 109.5     |
| H8B14-C814-H8C14  | 109.5     |
| C7A15-N1A15-C5A15 | 112.9(16) |
| C7A15-N1A15-C3A15 | 111.8(16) |
| C5A15-N1A15-C3A15 | 107.4(15) |
| C7A15-N1A15-C1A15 | 106.1(14) |
| C5A15-N1A15-C1A15 | 109.9(16) |
| C3A15-N1A15-C1A15 | 108.8(16) |
| C2A15-C1A15-N1A15 | 117.2(16) |
| C2A15-C1A15-H1C15 | 108.0     |
| N1A15-C1A15-H1C15 | 108.0     |
| C2A15-C1A15-H1D15 | 108.0     |
| N1A15-C1A15-H1D15 | 108.0     |
| H1C15-C1A15-H1D15 | 107.2     |
| C1A15-C2A15-H2D15 | 109.5     |
| C1A15-C2A15-H2E15 | 109.5     |
| H2D15-C2A15-H2E15 | 109.5     |
| C1A15-C2A15-H2F15 | 109.5     |
| H2D15-C2A15-H2F15 | 109.5     |
| H2E15-C2A15-H2F15 | 109.5     |
| C4A15-C3A15-N1A15 | 115.9(19) |
| C4A15-C3A15-H3C15 | 108.3     |
| N1A15-C3A15-H3C15 | 108.3     |
| C4A15-C3A15-H3D15 | 108.3     |
| N1A15-C3A15-H3D15 | 108.3     |
| H3C15-C3A15-H3D15 | 107.4     |
| C3A15-C4A15-H4D15 | 109.5     |
| C3A15-C4A15-H4E15 | 109.5     |
| H4D15-C4A15-H4E15 | 109.5     |
| C3A15-C4A15-H4F15 | 109.5     |
| H4D15-C4A15-H4F15 | 109.5     |
| H4E15-C4A15-H4F15 | 109.5     |
| N1A15-C5A15-C6A15 | 116.4(19) |

|                   |           |
|-------------------|-----------|
| N1A15-C5A15-H5C15 | 108.2     |
| C6A15-C5A15-H5C15 | 108.2     |
| N1A15-C5A15-H5D15 | 108.2     |
| C6A15-C5A15-H5D15 | 108.2     |
| H5C15-C5A15-H5D15 | 107.4     |
| C5A15-C6A15-H6D15 | 109.5     |
| C5A15-C6A15-H6E15 | 109.5     |
| H6D15-C6A15-H6E15 | 109.5     |
| C5A15-C6A15-H6F15 | 109.5     |
| H6D15-C6A15-H6F15 | 109.5     |
| H6E15-C6A15-H6F15 | 109.5     |
| N1A15-C7A15-C8A15 | 113.1(15) |
| N1A15-C7A15-H7C15 | 109.0     |
| C8A15-C7A15-H7C15 | 109.0     |
| N1A15-C7A15-H7D15 | 109.0     |
| C8A15-C7A15-H7D15 | 109.0     |
| H7C15-C7A15-H7D15 | 107.8     |
| C7A15-C8A15-H8D15 | 109.5     |
| C7A15-C8A15-H8E15 | 109.5     |
| H8D15-C8A15-H8E15 | 109.5     |
| C7A15-C8A15-H8F15 | 109.5     |
| H8D15-C8A15-H8F15 | 109.5     |
| H8E15-C8A15-H8F15 | 109.5     |
| H(1E)-O(1)-H(1F)  | 104(7)    |
| H(2G)-O(2)-H(2H)  | 90(7)     |
| H(3E)-O(3)-H(3F)  | 104(8)    |

---

Symmetry transformations used to generate equivalent atoms:

Table 4. Anisotropic displacement parameters ( $\text{\AA}^2 \times 10^3$ ) for 4536ds. The anisotropic displacement factor exponent takes the form:  $-2p^2[ h^2 a^*2U^{11} + \dots + 2 h k a^* b^* U^{12} ]$

|      | U <sup>11</sup> | U <sup>22</sup> | U <sup>33</sup> | U <sup>23</sup> | U <sup>13</sup> | U <sup>12</sup> |
|------|-----------------|-----------------|-----------------|-----------------|-----------------|-----------------|
| I11  | 15(1)           | 21(1)           | 24(1)           | -2(1)           | 1(1)            | 0(1)            |
| Cl11 | 19(1)           | 34(1)           | 38(1)           | 0(1)            | 2(1)            | -3(1)           |
| O11  | 32(2)           | 30(2)           | 36(2)           | 13(2)           | 0(2)            | 3(2)            |
| O21  | 20(2)           | 22(2)           | 28(2)           | -1(2)           | 5(1)            | -2(2)           |
| O31  | 23(2)           | 28(2)           | 36(2)           | 1(2)            | -1(2)           | 4(2)            |
| N11  | 18(2)           | 19(2)           | 25(2)           | 0(2)            | 7(2)            | -1(2)           |
| C11  | 19(3)           | 15(2)           | 22(3)           | -6(2)           | 4(2)            | 0(2)            |
| C21  | 21(3)           | 22(3)           | 22(3)           | -6(2)           | 3(2)            | 0(2)            |
| C31  | 26(3)           | 20(3)           | 24(3)           | -1(2)           | 1(2)            | 2(2)            |
| C41  | 30(3)           | 22(3)           | 20(3)           | 1(2)            | 3(2)            | -2(2)           |
| C51  | 22(3)           | 27(3)           | 24(3)           | -2(2)           | 2(2)            | -4(2)           |
| C61  | 24(3)           | 20(3)           | 17(3)           | -3(2)           | 0(2)            | -2(2)           |
| C71  | 17(2)           | 28(3)           | 22(3)           | -4(2)           | 1(2)            | -1(2)           |
| C81  | 17(2)           | 16(2)           | 24(3)           | -5(2)           | -3(2)           | 4(2)            |
| C91  | 17(2)           | 18(3)           | 20(3)           | -4(2)           | 2(2)            | -1(2)           |
| C101 | 18(3)           | 20(3)           | 24(3)           | -6(2)           | 4(2)            | 1(2)            |
| C111 | 23(2)           | 19(3)           | 19(2)           | -3(2)           | 0(2)            | 0(2)            |
| C121 | 23(3)           | 19(3)           | 21(3)           | 1(2)            | 8(2)            | 1(2)            |
| C131 | 22(3)           | 30(3)           | 22(3)           | -1(2)           | 2(2)            | 4(2)            |
| C141 | 21(3)           | 18(3)           | 26(3)           | -1(2)           | 5(2)            | -2(2)           |
| C151 | 27(3)           | 26(3)           | 27(3)           | -4(2)           | 6(2)            | -1(2)           |
| C161 | 29(3)           | 23(3)           | 38(3)           | -3(2)           | 10(3)           | -3(2)           |
| I12  | 14(1)           | 18(1)           | 24(1)           | 2(1)            | 3(1)            | 0(1)            |
| Cl12 | 18(1)           | 27(1)           | 36(1)           | 8(1)            | 6(1)            | -1(1)           |
| O12  | 27(2)           | 31(2)           | 30(2)           | 13(2)           | 0(2)            | 2(2)            |
| O22  | 18(2)           | 22(2)           | 26(2)           | 1(2)            | 6(1)            | -1(2)           |
| O32  | 18(2)           | 27(2)           | 36(2)           | 8(2)            | 3(2)            | 1(2)            |
| N12  | 15(2)           | 19(2)           | 25(2)           | 2(2)            | 6(2)            | 1(2)            |
| C12  | 14(2)           | 16(2)           | 26(3)           | -2(2)           | 4(2)            | -1(2)           |
| C22  | 19(3)           | 19(3)           | 27(3)           | -2(2)           | 6(2)            | 1(2)            |
| C32  | 18(2)           | 23(3)           | 26(3)           | 1(2)            | 0(2)            | 3(2)            |

|      |       |       |       |       |       |       |
|------|-------|-------|-------|-------|-------|-------|
| C42  | 23(3) | 22(3) | 26(3) | 6(2)  | 3(2)  | 0(2)  |
| C52  | 18(3) | 26(3) | 25(3) | 3(2)  | 5(2)  | -2(2) |
| C62  | 19(3) | 19(3) | 20(3) | -1(2) | 2(2)  | 0(2)  |
| C72  | 17(2) | 24(3) | 22(3) | 0(2)  | 2(2)  | -1(2) |
| C82  | 13(2) | 13(2) | 24(3) | 2(2)  | 1(2)  | 5(2)  |
| C92  | 16(2) | 18(3) | 21(3) | -3(2) | 2(2)  | -1(2) |
| C102 | 14(2) | 21(3) | 22(3) | -1(2) | 2(2)  | 0(2)  |
| C112 | 17(2) | 18(3) | 16(2) | -3(2) | -2(2) | 2(2)  |
| C122 | 17(2) | 21(3) | 18(3) | 4(2)  | 1(2)  | -2(2) |
| C132 | 20(3) | 24(3) | 23(3) | 1(2)  | 3(2)  | -1(2) |
| C142 | 19(3) | 18(3) | 22(3) | 1(2)  | 1(2)  | 0(2)  |
| C152 | 35(3) | 22(3) | 26(3) | -2(2) | 4(2)  | 0(2)  |
| C162 | 27(3) | 21(3) | 40(4) | 2(2)  | 5(3)  | -5(2) |
| I13  | 15(1) | 18(1) | 20(1) | -1(1) | 1(1)  | 1(1)  |
| Cl13 | 16(1) | 32(1) | 29(1) | 5(1)  | 2(1)  | -2(1) |
| O13  | 41(3) | 30(2) | 33(2) | 9(2)  | 3(2)  | 6(2)  |
| O23  | 17(2) | 22(2) | 27(2) | -2(2) | 4(1)  | -2(2) |
| O33  | 25(2) | 25(2) | 35(2) | 3(2)  | 1(2)  | 6(2)  |
| N13  | 16(2) | 16(2) | 21(2) | 0(2)  | 6(2)  | -2(2) |
| C13  | 19(2) | 16(2) | 15(2) | -2(2) | 0(2)  | 1(2)  |
| C23  | 19(3) | 19(3) | 21(3) | -4(2) | 2(2)  | 2(2)  |
| C33  | 25(3) | 21(3) | 19(3) | -4(2) | -1(2) | 6(2)  |
| C43  | 30(3) | 19(3) | 19(3) | 0(2)  | 0(2)  | 0(2)  |
| C53  | 20(3) | 23(3) | 20(3) | -2(2) | 2(2)  | -5(2) |
| C63  | 19(3) | 16(2) | 18(3) | -1(2) | 0(2)  | -1(2) |
| C73  | 16(2) | 17(2) | 20(3) | -2(2) | 1(2)  | 0(2)  |
| C83  | 16(2) | 15(2) | 18(2) | -3(2) | 0(2)  | 2(2)  |
| C93  | 18(2) | 18(2) | 13(2) | -4(2) | 1(2)  | -1(2) |
| C103 | 17(2) | 18(2) | 19(3) | -3(2) | 1(2)  | -1(2) |
| C113 | 20(2) | 17(3) | 19(2) | -6(2) | 2(2)  | 0(2)  |
| C123 | 22(3) | 20(3) | 19(3) | -1(2) | 7(2)  | 1(2)  |
| C133 | 27(3) | 23(3) | 24(3) | -1(2) | 2(2)  | 6(2)  |
| C143 | 21(3) | 23(3) | 26(3) | -2(2) | 4(2)  | -2(2) |
| C153 | 34(3) | 27(3) | 22(3) | -3(2) | 7(2)  | -2(2) |
| C163 | 41(4) | 29(3) | 34(3) | 1(3)  | 16(3) | -4(3) |
| I14  | 16(1) | 16(1) | 22(1) | 0(1)  | 2(1)  | 1(1)  |

|      |       |       |       |       |       |       |
|------|-------|-------|-------|-------|-------|-------|
| Cl14 | 16(1) | 24(1) | 28(1) | 0(1)  | 3(1)  | -2(1) |
| O14  | 34(2) | 27(2) | 31(2) | 9(2)  | 2(2)  | 0(2)  |
| O24  | 20(2) | 19(2) | 28(2) | -1(2) | 7(1)  | -1(2) |
| O34  | 24(2) | 29(2) | 40(2) | 8(2)  | 5(2)  | 3(2)  |
| N14  | 21(2) | 17(2) | 26(2) | 1(2)  | 7(2)  | -1(2) |
| C14  | 17(2) | 17(2) | 23(3) | -4(2) | 2(2)  | 0(2)  |
| C24  | 19(3) | 22(3) | 23(3) | -4(2) | 2(2)  | 1(2)  |
| C34  | 21(3) | 22(3) | 28(3) | -1(2) | -3(2) | 4(2)  |
| C44  | 23(3) | 19(2) | 24(3) | 2(2)  | 1(2)  | 3(2)  |
| C54  | 18(2) | 19(3) | 21(3) | -1(2) | 1(2)  | -3(2) |
| C64  | 15(2) | 18(2) | 20(3) | -2(2) | 1(2)  | -1(2) |
| C74  | 15(2) | 18(2) | 20(3) | -4(2) | 4(2)  | -2(2) |
| C84  | 14(2) | 15(2) | 18(2) | -2(2) | -3(2) | 2(2)  |
| C94  | 17(2) | 16(2) | 22(3) | -3(2) | 3(2)  | -2(2) |
| C104 | 17(2) | 17(2) | 24(3) | -4(2) | 4(2)  | -1(2) |
| C114 | 21(2) | 18(3) | 18(2) | -3(2) | 8(2)  | 0(2)  |
| C124 | 24(3) | 18(3) | 21(3) | 1(2)  | 5(2)  | 0(2)  |
| C134 | 27(3) | 22(3) | 26(3) | -2(2) | 2(2)  | 2(2)  |
| C144 | 25(3) | 17(3) | 24(3) | 0(2)  | 4(2)  | 3(2)  |
| C154 | 25(3) | 20(3) | 40(3) | 0(2)  | 7(3)  | -1(2) |
| C164 | 32(3) | 23(3) | 28(3) | -4(2) | 5(2)  | -3(2) |
| I15  | 14(1) | 19(1) | 22(1) | -1(1) | 1(1)  | 1(1)  |
| Cl15 | 16(1) | 28(1) | 39(1) | -2(1) | 3(1)  | -2(1) |
| O15  | 39(2) | 27(2) | 27(2) | 7(2)  | 5(2)  | 6(2)  |
| O25  | 18(2) | 22(2) | 25(2) | -1(2) | 4(1)  | -1(2) |
| O35  | 24(2) | 31(2) | 35(2) | 4(2)  | 3(2)  | 5(2)  |
| N15  | 16(2) | 18(2) | 24(2) | 2(2)  | 6(2)  | 0(2)  |
| C15  | 20(3) | 15(2) | 17(2) | -2(2) | -1(2) | -1(2) |
| C25  | 19(3) | 22(3) | 20(3) | 0(2)  | 1(2)  | 5(2)  |
| C35  | 25(3) | 24(3) | 22(3) | 1(2)  | 0(2)  | 3(2)  |
| C45  | 29(3) | 19(3) | 21(3) | 3(2)  | 1(2)  | 1(2)  |
| C55  | 20(3) | 23(3) | 26(3) | -1(2) | 4(2)  | -3(2) |
| C65  | 19(3) | 17(2) | 18(3) | -4(2) | 1(2)  | 0(2)  |
| C75  | 16(2) | 20(3) | 18(3) | -2(2) | 2(2)  | -1(2) |
| C85  | 15(2) | 18(2) | 18(3) | -2(2) | -1(2) | 1(2)  |
| C95  | 16(2) | 18(2) | 18(2) | -4(2) | 2(2)  | 1(2)  |



|      |       |       |       |        |       |       |
|------|-------|-------|-------|--------|-------|-------|
| C105 | 16(2) | 16(2) | 20(3) | -5(2)  | 2(2)  | 1(2)  |
| C115 | 17(2) | 19(3) | 19(2) | -3(2)  | 1(2)  | 1(2)  |
| C125 | 25(3) | 19(3) | 23(3) | 2(2)   | 6(2)  | 0(2)  |
| C135 | 28(3) | 23(3) | 23(3) | 0(2)   | 3(2)  | 7(2)  |
| C145 | 24(3) | 19(3) | 28(3) | 0(2)   | 5(2)  | -1(2) |
| C155 | 33(3) | 21(3) | 38(3) | 0(2)   | 11(3) | -7(2) |
| C165 | 33(3) | 24(3) | 24(3) | -3(2)  | 6(2)  | -2(2) |
| I16  | 16(1) | 17(1) | 22(1) | 0(1)   | 0(1)  | 3(1)  |
| CI16 | 16(1) | 25(1) | 36(1) | 0(1)   | 1(1)  | 1(1)  |
| O16  | 57(3) | 24(2) | 34(2) | 12(2)  | 9(2)  | 14(2) |
| O26  | 19(2) | 19(2) | 28(2) | -3(2)  | 7(1)  | -3(2) |
| O36  | 27(2) | 24(2) | 40(2) | 6(2)   | -2(2) | 4(2)  |
| N16  | 18(2) | 13(2) | 25(2) | 1(2)   | 5(2)  | 1(2)  |
| C16  | 19(2) | 16(2) | 18(2) | -4(2)  | 1(2)  | -3(2) |
| C26  | 18(2) | 18(2) | 23(3) | -4(2)  | 1(2)  | 1(2)  |
| C36  | 22(2) | 20(3) | 21(2) | 0(2)   | -3(2) | 4(2)  |
| C46  | 25(2) | 16(3) | 20(2) | 3(2)   | -1(2) | -1(2) |
| C56  | 19(3) | 19(3) | 21(3) | 2(2)   | 2(2)  | -2(2) |
| C66  | 19(2) | 17(2) | 16(2) | -2(2)  | -2(2) | -1(2) |
| C76  | 15(2) | 20(3) | 20(3) | -4(2)  | 3(2)  | -1(2) |
| C86  | 14(2) | 14(2) | 21(3) | -5(2)  | 0(2)  | 4(2)  |
| C96  | 15(2) | 16(2) | 20(3) | 1(2)   | 1(2)  | 1(2)  |
| C106 | 15(2) | 19(3) | 21(3) | -3(2)  | 4(2)  | -2(2) |
| C116 | 19(2) | 17(3) | 17(2) | -3(2)  | 2(2)  | 0(2)  |
| C126 | 29(3) | 15(3) | 25(3) | 3(2)   | 8(2)  | 2(2)  |
| C136 | 36(3) | 22(3) | 22(3) | -5(2)  | 4(2)  | 6(2)  |
| C146 | 27(3) | 17(3) | 30(3) | -3(2)  | 8(2)  | 2(2)  |
| C156 | 49(4) | 21(3) | 34(3) | -5(2)  | 15(3) | -7(3) |
| C166 | 37(3) | 21(3) | 24(3) | 0(2)   | 4(2)  | 2(2)  |
| N17  | 31(3) | 34(3) | 28(3) | 2(3)   | 3(2)  | 5(3)  |
| C17  | 42(4) | 33(4) | 30(4) | -3(3)  | 3(3)  | -2(3) |
| C27  | 61(9) | 44(6) | 31(6) | -10(5) | 7(5)  | -9(6) |
| C37  | 35(4) | 35(4) | 39(4) | 4(3)   | -5(3) | 2(3)  |
| C47  | 42(5) | 25(4) | 58(6) | 3(4)   | -4(5) | 10(4) |
| C57  | 36(4) | 33(4) | 34(4) | -3(3)  | 1(3)  | 11(3) |
| C67  | 27(4) | 28(5) | 60(7) | 2(4)   | 0(4)  | 3(4)  |

|      |        |        |        |        |        |        |
|------|--------|--------|--------|--------|--------|--------|
| C77  | 34(4)  | 34(4)  | 36(4)  | 0(3)   | 10(3)  | -4(3)  |
| C87  | 29(5)  | 52(8)  | 55(9)  | 1(7)   | 2(4)   | -6(4)  |
| N1A8 | 34(5)  | 35(5)  | 34(5)  | 1(5)   | 2(5)   | 5(5)   |
| C1A8 | 40(6)  | 38(6)  | 40(6)  | 4(6)   | 4(6)   | 3(6)   |
| C2A8 | 48(16) | 45(14) | 43(16) | 20(13) | 9(14)  | 0(14)  |
| C3A8 | 37(6)  | 39(6)  | 38(6)  | 0(6)   | 4(6)   | 7(6)   |
| C4A8 | 47(14) | 46(15) | 63(15) | -9(14) | -2(15) | 9(14)  |
| C5A8 | 35(6)  | 34(6)  | 35(6)  | 0(6)   | 2(6)   | 4(6)   |
| C6A8 | 44(14) | 48(16) | 65(16) | -2(14) | -2(13) | 23(13) |
| C7A8 | 33(6)  | 38(6)  | 35(6)  | 2(6)   | -4(6)  | 3(6)   |
| C8A8 | 24(13) | 48(15) | 39(16) | 16(14) | 8(12)  | -9(12) |
| N19  | 18(2)  | 22(2)  | 24(2)  | 3(2)   | 2(2)   | 3(2)   |
| C19  | 36(3)  | 29(3)  | 22(3)  | 4(2)   | 3(2)   | 0(2)   |
| C29  | 39(3)  | 54(5)  | 30(3)  | 5(3)   | -8(3)  | 9(3)   |
| C39  | 23(3)  | 28(3)  | 31(3)  | 1(2)   | 4(2)   | -3(2)  |
| C49  | 28(3)  | 26(3)  | 43(4)  | -7(3)  | 3(3)   | -5(2)  |
| C59  | 21(3)  | 25(3)  | 34(3)  | 0(2)   | 3(2)   | 3(2)   |
| C69  | 22(3)  | 29(3)  | 47(4)  | -4(3)  | 2(3)   | -1(2)  |
| C79  | 20(2)  | 21(3)  | 30(3)  | -3(2)  | 4(2)   | 1(2)   |
| C89  | 31(3)  | 38(3)  | 27(3)  | -4(3)  | 0(2)   | 3(3)   |
| N110 | 25(2)  | 17(2)  | 20(2)  | 2(2)   | 3(2)   | 0(2)   |
| C110 | 35(3)  | 21(3)  | 42(4)  | 0(3)   | 3(3)   | -2(2)  |
| C210 | 38(3)  | 25(3)  | 33(3)  | -10(2) | 3(3)   | -3(3)  |
| C310 | 34(3)  | 30(3)  | 34(3)  | 0(3)   | -1(2)  | 6(3)   |
| C410 | 34(4)  | 60(5)  | 52(4)  | -2(3)  | 3(3)   | 14(3)  |
| C510 | 39(4)  | 32(3)  | 27(3)  | 7(3)   | 1(3)   | 1(3)   |
| C610 | 48(3)  | 34(4)  | 28(3)  | -12(3) | 7(2)   | -5(3)  |
| C710 | 32(3)  | 34(3)  | 41(4)  | -5(3)  | 9(3)   | -11(3) |
| C810 | 26(3)  | 53(5)  | 86(6)  | -30(4) | -2(4)  | 7(3)   |
| N111 | 19(2)  | 16(2)  | 20(2)  | 1(2)   | 4(2)   | -1(2)  |
| C111 | 21(2)  | 21(3)  | 24(2)  | 0(2)   | -2(2)  | -3(2)  |
| C211 | 34(3)  | 26(3)  | 24(2)  | 1(3)   | 0(2)   | 0(3)   |
| C311 | 22(3)  | 25(3)  | 27(3)  | 1(2)   | 0(2)   | -3(2)  |
| C411 | 25(3)  | 30(3)  | 36(3)  | 3(2)   | 2(2)   | 6(2)   |
| C511 | 30(3)  | 17(3)  | 30(3)  | -4(2)  | 8(2)   | 3(2)   |
| C611 | 29(3)  | 21(3)  | 40(3)  | -1(2)  | 13(3)  | 1(2)   |

|       |        |        |        |         |        |        |
|-------|--------|--------|--------|---------|--------|--------|
| C711  | 25(3)  | 21(3)  | 20(3)  | 1(2)    | 0(2)   | 0(2)   |
| C811  | 25(3)  | 46(4)  | 30(3)  | 5(3)    | -2(2)  | 3(3)   |
| N112  | 27(4)  | 28(4)  | 27(4)  | 6(4)    | 1(4)   | 1(4)   |
| C112  | 38(5)  | 33(5)  | 31(5)  | -3(4)   | 8(4)   | -1(4)  |
| C212  | 45(10) | 27(9)  | 40(8)  | -10(7)  | 10(8)  | 15(7)  |
| C312  | 32(4)  | 33(4)  | 37(5)  | -2(4)   | 6(4)   | 1(4)   |
| C412  | 24(6)  | 34(9)  | 51(12) | 3(9)    | -7(7)  | -3(5)  |
| C512  | 27(4)  | 27(4)  | 35(5)  | 2(4)    | 0(4)   | 5(4)   |
| C612  | 28(6)  | 36(8)  | 52(11) | 4(9)    | 7(8)   | 5(5)   |
| C712  | 30(4)  | 33(5)  | 35(5)  | 1(4)    | -5(4)  | 2(4)   |
| C812  | 35(7)  | 33(8)  | 51(11) | 0(7)    | -2(9)  | 9(7)   |
| N1A13 | 28(4)  | 27(4)  | 29(4)  | 5(4)    | 2(4)   | 2(4)   |
| C1A13 | 33(5)  | 29(5)  | 33(5)  | 3(4)    | 4(4)   | -3(4)  |
| C2A13 | 31(8)  | 45(9)  | 40(11) | 6(10)   | 9(8)   | -7(7)  |
| C3A13 | 34(5)  | 26(5)  | 43(5)  | 7(4)    | 5(4)   | 3(4)   |
| C4A13 | 52(13) | 27(11) | 75(12) | -3(10)  | 9(11)  | 5(10)  |
| C5A13 | 30(5)  | 40(5)  | 31(5)  | -1(4)   | 5(4)   | 1(4)   |
| C6A13 | 26(8)  | 55(12) | 38(10) | -16(9)  | 9(9)   | 3(9)   |
| C7A13 | 31(5)  | 37(5)  | 37(5)  | 3(4)    | -5(4)  | 3(4)   |
| C8A13 | 39(9)  | 53(12) | 44(13) | 11(10)  | -4(8)  | 0(8)   |
| N114  | 24(4)  | 19(4)  | 27(4)  | 7(4)    | 0(4)   | -5(4)  |
| C114  | 38(5)  | 24(6)  | 39(7)  | 3(6)    | 5(6)   | -2(5)  |
| C214  | 55(9)  | 33(8)  | 60(13) | -17(10) | 4(11)  | -11(7) |
| C314  | 17(6)  | 31(6)  | 30(5)  | 7(5)    | 4(5)   | -13(5) |
| C414  | 25(8)  | 43(13) | 33(10) | 9(8)    | 11(7)  | -10(8) |
| C514  | 15(6)  | 31(5)  | 34(6)  | 8(5)    | 5(5)   | -8(5)  |
| C614  | 19(7)  | 42(10) | 43(12) | 5(8)    | 2(7)   | 9(7)   |
| C714  | 30(5)  | 22(7)  | 25(5)  | 1(6)    | 2(4)   | -7(6)  |
| C814  | 37(8)  | 31(10) | 47(10) | -12(8)  | -2(7)  | 11(9)  |
| N1A15 | 25(4)  | 21(5)  | 26(4)  | 6(4)    | 6(4)   | -4(4)  |
| C1A15 | 36(6)  | 23(6)  | 35(8)  | 1(6)    | 9(7)   | -4(5)  |
| C2A15 | 69(11) | 42(9)  | 55(13) | -10(10) | 23(12) | 0(8)   |
| C3A15 | 20(7)  | 29(7)  | 27(5)  | 7(5)    | 0(5)   | -2(6)  |
| C4A15 | 17(8)  | 36(12) | 40(13) | 11(9)   | 2(8)   | -9(7)  |
| C5A15 | 24(7)  | 30(6)  | 35(6)  | 7(6)    | 1(6)   | 3(6)   |
| C6A15 | 30(8)  | 42(11) | 49(14) | 9(10)   | -9(9)  | -4(7)  |

|       |       |        |       |        |       |        |
|-------|-------|--------|-------|--------|-------|--------|
| C7A15 | 35(6) | 27(8)  | 31(5) | 1(6)   | 0(5)  | -2(7)  |
| C8A15 | 36(8) | 37(11) | 44(9) | -10(9) | -4(7) | 6(10)  |
| O(1)  | 36(3) | 38(3)  | 42(3) | 5(2)   | 5(2)  | 11(2)  |
| O(2)  | 24(2) | 35(3)  | 37(3) | 2(2)   | -2(2) | 6(2)   |
| O(3)  | 41(3) | 35(3)  | 41(3) | -12(2) | 15(2) | -14(2) |

---

Table 5. Hydrogen coordinates ( $\times 10^4$ ) and isotropic displacement parameters ( $\text{\AA}^2 \times 10^3$ ) for 4536ds.

|       | x    | y     | z     | U(eq) |
|-------|------|-------|-------|-------|
| H21   | 1162 | 9274  | 8990  | 26    |
| H31   | 1423 | 10699 | 8482  | 28    |
| H41   | 2380 | 10768 | 8183  | 29    |
| H51   | 3067 | 9401  | 8395  | 29    |
| H71   | 3343 | 7649  | 8842  | 27    |
| H101  | 1423 | 7485  | 9420  | 25    |
| H121  | 2138 | 3910  | 10205 | 25    |
| H141  | 1774 | 3594  | 9334  | 26    |
| H15A1 | 2279 | 2395  | 8846  | 40    |
| H15B1 | 2798 | 2229  | 9280  | 40    |
| H15C1 | 2717 | 3392  | 9004  | 40    |
| H16A1 | 1572 | 1714  | 9452  | 45    |
| H16B1 | 1468 | 2411  | 9943  | 45    |
| H16C1 | 2057 | 1682  | 9918  | 45    |
| H22   | 2850 | 9241  | 7333  | 26    |
| H32   | 3072 | 10665 | 6812  | 27    |
| H42   | 3991 | 10721 | 6456  | 28    |
| H52   | 4694 | 9365  | 6631  | 27    |
| H72   | 5013 | 7628  | 7082  | 25    |
| H102  | 3144 | 7459  | 7757  | 22    |
| H122  | 3915 | 3923  | 8522  | 23    |
| H142  | 3487 | 3566  | 7668  | 24    |
| H15A2 | 3950 | 2331  | 7173  | 42    |
| H15B2 | 4491 | 2171  | 7587  | 42    |
| H15C2 | 4404 | 3321  | 7301  | 42    |
| H16A2 | 3282 | 1694  | 7825  | 44    |
| H16B2 | 3221 | 2422  | 8314  | 44    |
| H16C2 | 3800 | 1677  | 8266  | 44    |
| H23   | 5926 | 9105  | 3816  | 24    |
| H33   | 6128 | 10557 | 3305  | 26    |

|       |      |       |      |    |
|-------|------|-------|------|----|
| H43   | 7057 | 10685 | 2959 | 27 |
| H53   | 7775 | 9366  | 3132 | 25 |
| H73   | 8123 | 7645  | 3582 | 21 |
| H103  | 6245 | 7323  | 4235 | 22 |
| H123  | 7098 | 3842  | 5007 | 24 |
| H143  | 6642 | 3430  | 4181 | 28 |
| H15A3 | 7117 | 2296  | 3645 | 41 |
| H15B3 | 7692 | 2202  | 4030 | 41 |
| H15C3 | 7531 | 3350  | 3761 | 41 |
| H16A3 | 6506 | 1545  | 4315 | 51 |
| H16B3 | 6488 | 2189  | 4832 | 51 |
| H16C3 | 7071 | 1518  | 4712 | 51 |
| H24   | 4413 | 9069  | 5593 | 25 |
| H34   | 4599 | 10496 | 5061 | 29 |
| H44   | 5493 | 10574 | 4668 | 27 |
| H54   | 6216 | 9225  | 4822 | 23 |
| H74   | 6576 | 7524  | 5274 | 21 |
| H104  | 4749 | 7310  | 6019 | 23 |
| H124  | 5616 | 3807  | 6783 | 25 |
| H144  | 5131 | 3508  | 5936 | 26 |
| H15A4 | 4918 | 1630  | 6101 | 42 |
| H15B4 | 4853 | 2403  | 6575 | 42 |
| H15C4 | 5429 | 1643  | 6547 | 42 |
| H16A4 | 5548 | 2171  | 5438 | 42 |
| H16B4 | 6121 | 2079  | 5825 | 42 |
| H16C4 | 5996 | 3190  | 5515 | 42 |
| H25   | -680 | 9190  | 491  | 25 |
| H35   | -402 | 10642 | 6    | 28 |
| H45   | 581  | 10786 | -227 | 27 |
| H55   | 1283 | 9468  | 25   | 27 |
| H75   | 1555 | 7724  | 483  | 22 |
| H105  | -422 | 7406  | 930  | 21 |
| H125  | 328  | 3914  | 1786 | 26 |
| H145  | -7   | 3541  | 918  | 28 |
| H15A5 | -168 | 1656  | 1028 | 45 |
| H15B5 | -276 | 2308  | 1530 | 45 |

|       |      |       |      |    |
|-------|------|-------|------|----|
| H15C5 | 327  | 1630  | 1487 | 45 |
| H16A5 | 556  | 2351  | 452  | 40 |
| H16B5 | 1079 | 2334  | 888  | 40 |
| H16C5 | 930  | 3445  | 585  | 40 |
| H26   | 7558 | 9291  | 2072 | 24 |
| H36   | 7816 | 10748 | 1586 | 25 |
| H46   | 8773 | 10856 | 1293 | 25 |
| H56   | 9478 | 9527  | 1511 | 24 |
| H76   | 9778 | 7798  | 1976 | 22 |
| H106  | 7828 | 7502  | 2495 | 22 |
| H126  | 8585 | 4002  | 3308 | 27 |
| H146  | 8209 | 3607  | 2458 | 29 |
| H15A6 | 8075 | 1722  | 2565 | 52 |
| H15B6 | 8011 | 2340  | 3083 | 52 |
| H15C6 | 8609 | 1687  | 2992 | 52 |
| H16A6 | 8752 | 2516  | 1944 | 40 |
| H16B6 | 9293 | 2425  | 2364 | 40 |
| H16C6 | 9142 | 3580  | 2097 | 40 |
| H1A7  | 4570 | 4960  | 2256 | 42 |
| H1B7  | 3879 | 4651  | 2231 | 42 |
| H2A7  | 4302 | 6687  | 1826 | 68 |
| H2B7  | 4042 | 6611  | 2363 | 68 |
| H2C7  | 3617 | 6385  | 1869 | 68 |
| H3A7  | 4678 | 3163  | 1849 | 44 |
| H3B7  | 3972 | 3039  | 1832 | 44 |
| H4A7  | 3935 | 2662  | 982  | 63 |
| H4B7  | 4373 | 1816  | 1282 | 63 |
| H4C7  | 4640 | 2824  | 987  | 63 |
| H5A7  | 3749 | 4408  | 870  | 41 |
| H5B7  | 3661 | 5552  | 1149 | 41 |
| H6A7  | 2774 | 4448  | 1141 | 58 |
| H6B7  | 3029 | 4687  | 1702 | 58 |
| H6C7  | 3139 | 3516  | 1453 | 58 |
| H7A7  | 4727 | 5765  | 1280 | 41 |
| H7B7  | 4755 | 4665  | 958  | 41 |
| H8A7  | 5439 | 3889  | 1556 | 68 |

|      |      |      |      |    |
|------|------|------|------|----|
| H8B7 | 5384 | 4932 | 1912 | 68 |
| H8C7 | 5684 | 5063 | 1396 | 68 |
| H1C8 | 3743 | 6027 | 1372 | 47 |
| H1D8 | 4451 | 6173 | 1383 | 47 |
| H2D8 | 4231 | 7096 | 2116 | 68 |
| H2E8 | 4437 | 5917 | 2330 | 68 |
| H2F8 | 3744 | 6204 | 2245 | 68 |
| H3C8 | 4604 | 4505 | 916  | 46 |
| H3D8 | 3896 | 4397 | 841  | 46 |
| H4D8 | 4298 | 2688 | 680  | 78 |
| H4E8 | 3979 | 2580 | 1189 | 78 |
| H4F8 | 4688 | 2695 | 1203 | 78 |
| H5C8 | 3622 | 4470 | 2125 | 42 |
| H5D8 | 3814 | 3298 | 1925 | 42 |
| H6D8 | 3149 | 3898 | 1157 | 79 |
| H6E8 | 2841 | 4601 | 1569 | 79 |
| H6F8 | 2875 | 3289 | 1615 | 79 |
| H7C8 | 4737 | 4740 | 2220 | 43 |
| H7D8 | 4741 | 3527 | 1995 | 43 |
| H8D8 | 5602 | 3868 | 1741 | 56 |
| H8E8 | 5560 | 5131 | 1903 | 56 |
| H8F8 | 5304 | 4753 | 1358 | 56 |
| H1A9 | 2760 | 4240 | 2544 | 35 |
| H1B9 | 2926 | 5435 | 2760 | 35 |
| H2A9 | 1984 | 5516 | 2345 | 63 |
| H2B9 | 1910 | 5694 | 2926 | 63 |
| H2C9 | 1755 | 4527 | 2673 | 63 |
| H3A9 | 1960 | 3661 | 3385 | 33 |
| H3B9 | 2475 | 3051 | 3721 | 33 |
| H4A9 | 2222 | 2730 | 2678 | 48 |
| H4B9 | 2121 | 1845 | 3104 | 48 |
| H4C9 | 2782 | 2184 | 2986 | 48 |
| H5A9 | 3462 | 3413 | 3667 | 32 |
| H5B9 | 3475 | 3371 | 3074 | 32 |
| H6A9 | 4291 | 4361 | 3374 | 49 |
| H6B9 | 3895 | 5138 | 3697 | 49 |



|       |       |      |      |    |
|-------|-------|------|------|----|
| H6C9  | 3840  | 5226 | 3102 | 49 |
| H7A9  | 2932  | 5865 | 3594 | 28 |
| H7B9  | 2272  | 5432 | 3650 | 28 |
| H8A9  | 2649  | 4256 | 4310 | 48 |
| H8B9  | 2760  | 5529 | 4438 | 48 |
| H8C9  | 3294  | 4783 | 4268 | 48 |
| H1A10 | 9279  | 3077 | 6513 | 39 |
| H1B10 | 9978  | 2945 | 6468 | 39 |
| H2A10 | 9812  | 3730 | 5631 | 48 |
| H2B10 | 9116  | 3561 | 5687 | 48 |
| H2C10 | 9551  | 2518 | 5695 | 48 |
| H3A10 | 9237  | 5323 | 5980 | 39 |
| H3B10 | 9341  | 6069 | 6467 | 39 |
| H4A10 | 8320  | 5445 | 6290 | 73 |
| H4B10 | 8586  | 5200 | 6848 | 73 |
| H4C10 | 8545  | 4233 | 6443 | 73 |
| H5A10 | 10080 | 3971 | 7220 | 39 |
| H5B10 | 9379  | 4176 | 7210 | 39 |
| H6A10 | 10247 | 5892 | 7277 | 55 |
| H6B10 | 9887  | 5475 | 7731 | 55 |
| H6C10 | 9545  | 6095 | 7269 | 55 |
| H7A10 | 10292 | 4979 | 6007 | 42 |
| H7B10 | 10328 | 5815 | 6467 | 42 |
| H8A10 | 10840 | 3660 | 6520 | 83 |
| H8B10 | 10904 | 4551 | 6959 | 83 |
| H8C10 | 11215 | 4761 | 6452 | 83 |
| H1A11 | 1583  | 5314 | 4379 | 26 |
| H1B11 | 1043  | 6005 | 4571 | 26 |
| H2A11 | 1059  | 6141 | 3697 | 42 |
| H2B11 | 452   | 5579 | 3838 | 42 |
| H2C11 | 975   | 4836 | 3647 | 42 |
| H3A11 | 121   | 4132 | 4251 | 30 |
| H3B11 | 144   | 3584 | 4792 | 30 |
| H4A11 | -3    | 5874 | 4589 | 45 |
| H4B11 | 87    | 5391 | 5143 | 45 |
| H4C11 | -493  | 5073 | 4793 | 45 |

|       |      |      |       |    |
|-------|------|------|-------|----|
| H5A11 | 1042 | 3298 | 4054  | 30 |
| H5B11 | 1616 | 3344 | 4441  | 30 |
| H6A11 | 565  | 2113 | 4555  | 44 |
| H6B11 | 1061 | 2284 | 5007  | 44 |
| H6C11 | 1221 | 1632 | 4518  | 44 |
| H7A11 | 988  | 3812 | 5375  | 27 |
| H7B11 | 993  | 5121 | 5323  | 27 |
| H8A11 | 1988 | 3744 | 5175  | 51 |
| H8B11 | 1924 | 4508 | 5653  | 51 |
| H8C11 | 1993 | 5056 | 5119  | 51 |
| H1A12 | 5688 | 4616 | 10511 | 40 |
| H1B12 | 6379 | 4894 | 10515 | 40 |
| H2A12 | 6128 | 6620 | 10160 | 55 |
| H2B12 | 5888 | 6456 | 10699 | 55 |
| H2C12 | 5442 | 6337 | 10210 | 55 |
| H3A12 | 6445 | 5844 | 9556  | 41 |
| H3B12 | 6454 | 4803 | 9194  | 41 |
| H4A12 | 7217 | 3992 | 9686  | 55 |
| H4B12 | 7156 | 4868 | 10123 | 55 |
| H4C12 | 7412 | 5244 | 9611  | 55 |
| H5A12 | 5483 | 4380 | 9168  | 36 |
| H5B12 | 5374 | 5489 | 9465  | 36 |
| H6A12 | 4539 | 4329 | 9466  | 58 |
| H6B12 | 4816 | 4518 | 10025 | 58 |
| H6C12 | 4938 | 3391 | 9742  | 58 |
| H7A12 | 6515 | 3177 | 10064 | 40 |
| H7B12 | 5820 | 2973 | 10096 | 40 |
| H8A12 | 5698 | 2624 | 9253  | 60 |
| H8B12 | 6220 | 1856 | 9495  | 60 |
| H8C12 | 6379 | 2934 | 9190  | 60 |
| H1C13 | 5594 | 3246 | 10169 | 38 |
| H1D13 | 5506 | 4371 | 10461 | 38 |
| H2D13 | 4776 | 4898 | 9848  | 58 |
| H2E13 | 4608 | 3769 | 10110 | 58 |
| H2F13 | 4858 | 3751 | 9568  | 58 |
| H3C13 | 6245 | 6143 | 9682  | 41 |

|       |      |      |       |    |
|-------|------|------|-------|----|
| H3D13 | 5547 | 5952 | 9576  | 41 |
| H4D13 | 5827 | 7196 | 10253 | 77 |
| H4E13 | 6072 | 6150 | 10566 | 77 |
| H4F13 | 5379 | 6242 | 10391 | 77 |
| H5C13 | 6270 | 4528 | 9142  | 40 |
| H5D13 | 5570 | 4336 | 9153  | 40 |
| H6D13 | 5736 | 2516 | 9426  | 59 |
| H6E13 | 6440 | 2703 | 9444  | 59 |
| H6F13 | 6052 | 2709 | 8920  | 59 |
| H7C13 | 6571 | 4627 | 10466 | 42 |
| H7D13 | 6579 | 3475 | 10182 | 42 |
| H8D13 | 7173 | 4168 | 9612  | 69 |
| H8E13 | 7466 | 4470 | 10155 | 69 |
| H8F13 | 7110 | 5388 | 9826  | 69 |
| H1A14 | 8012 | 6003 | 7886  | 40 |
| H1B14 | 7306 | 5889 | 7798  | 40 |
| H2A14 | 7638 | 7160 | 8450  | 74 |
| H2B14 | 7878 | 6122 | 8773  | 74 |
| H2C14 | 7181 | 6252 | 8621  | 74 |
| H3A14 | 8159 | 4431 | 8792  | 31 |
| H3B14 | 8214 | 3324 | 8479  | 31 |
| H4A14 | 8901 | 4185 | 7993  | 50 |
| H4B14 | 9129 | 4206 | 8571  | 50 |
| H4C14 | 8848 | 5290 | 8310  | 50 |
| H5A14 | 7091 | 4404 | 8633  | 32 |
| H5B14 | 7221 | 3237 | 8390  | 32 |
| H6A14 | 6531 | 4894 | 7861  | 52 |
| H6B14 | 6239 | 3915 | 8157  | 52 |
| H6C14 | 6604 | 3647 | 7684  | 52 |
| H7A14 | 8118 | 4321 | 7456  | 31 |
| H7B14 | 7410 | 4264 | 7372  | 31 |
| H8A14 | 7793 | 2533 | 7224  | 58 |
| H8B14 | 7439 | 2458 | 7717  | 58 |
| H8C14 | 8151 | 2519 | 7761  | 58 |
| H1C15 | 8039 | 6210 | 8060  | 37 |
| H1D15 | 7334 | 6100 | 7981  | 37 |

|       |          |          |          |    |
|-------|----------|----------|----------|----|
| H2D15 | 7675     | 7128     | 8706     | 82 |
| H2E15 | 7943     | 6010     | 8944     | 82 |
| H2F15 | 7240     | 6137     | 8823     | 82 |
| H3C15 | 8286     | 4530     | 8795     | 31 |
| H3D15 | 8305     | 3440     | 8466     | 31 |
| H4D15 | 8981     | 4153     | 7984     | 46 |
| H4E15 | 9201     | 4569     | 8531     | 46 |
| H4F15 | 8847     | 5388     | 8148     | 46 |
| H5C15 | 7225     | 4270     | 8717     | 36 |
| H5D15 | 7296     | 3252     | 8352     | 36 |
| H6D15 | 6607     | 4083     | 7753     | 61 |
| H6E15 | 6529     | 5086     | 8128     | 61 |
| H6F15 | 6313     | 3879     | 8268     | 61 |
| H7C15 | 8139     | 4759     | 7488     | 37 |
| H7D15 | 7429     | 4710     | 7416     | 37 |
| H8D15 | 7932     | 3059     | 7143     | 59 |
| H8E15 | 7423     | 2821     | 7512     | 59 |
| H8F15 | 8108     | 2801     | 7719     | 59 |
| H(1E) | 7950(40) | 2450(70) | 5887(19) | 58 |
| H(1F) | 7620(30) | 2750(60) | 6270(30) | 58 |
| H(2G) | 710(30)  | 3070(70) | 3070(30) | 49 |
| H(2H) | 990(30)  | 2790(60) | 2720(30) | 49 |
| H(3E) | 760(40)  | 7240(70) | 5750(30) | 58 |
| H(3F) | 970(40)  | 7440(70) | 5360(30) | 58 |

---

Table 6. Torsion angles [°] for 4536ds.

---

|                    |           |
|--------------------|-----------|
| C101-C11-C21-C31   | -177.9(5) |
| C61-C11-C21-C31    | 0.1(8)    |
| C11-C21-C31-C41    | -0.2(8)   |
| C21-C31-C41-C51    | 0.0(8)    |
| C31-C41-C51-C61    | 0.2(8)    |
| C41-C51-C61-C71    | 179.8(5)  |
| C41-C51-C61-C11    | -0.2(8)   |
| C21-C11-C61-C51    | 0.1(7)    |
| C101-C11-C61-C51   | 178.2(5)  |
| C21-C11-C61-C71    | -180.0(5) |
| C101-C11-C61-C71   | -1.9(7)   |
| C51-C61-C71-C81    | -179.3(5) |
| C11-C61-C71-C81    | 0.7(8)    |
| C61-C71-C81-C91    | 1.1(8)    |
| C61-C71-C81-I11    | -177.9(4) |
| C71-C81-C91-C101   | -1.7(8)   |
| I11-C81-C91-C101   | 177.4(4)  |
| C71-C81-C91-C111   | 171.8(5)  |
| I11-C81-C91-C111   | -9.0(6)   |
| C81-C91-C101-C11   | 0.5(8)    |
| C111-C91-C101-C11  | -172.8(5) |
| C21-C11-C101-C91   | 179.3(5)  |
| C61-C11-C101-C91   | 1.3(8)    |
| C121-N11-C111-O21  | 4.5(7)    |
| I11-N11-C111-O21   | -176.7(4) |
| C121-N11-C111-C91  | -172.5(4) |
| I11-N11-C111-C91   | 6.3(5)    |
| C101-C91-C111-O21  | -1.6(8)   |
| C81-C91-C111-O21   | -174.9(5) |
| C101-C91-C111-N11  | 175.4(5)  |
| C81-C91-C111-N11   | 2.1(7)    |
| C111-N11-C121-C131 | -158.9(4) |
| I11-N11-C121-C131  | 22.4(6)   |
| C111-N11-C121-C141 | 77.3(6)   |

|                     |           |
|---------------------|-----------|
| I11-N11-C121-C141   | -101.4(4) |
| I11-O31-C131-O11    | -178.3(5) |
| I11-O31-C131-C121   | 4.1(6)    |
| N11-C121-C131-O11   | 166.6(5)  |
| C141-C121-C131-O11  | -70.4(6)  |
| N11-C121-C131-O31   | -15.6(7)  |
| C141-C121-C131-O31  | 107.5(5)  |
| N11-C121-C141-C161  | -158.6(4) |
| C131-C121-C141-C161 | 77.7(6)   |
| N11-C121-C141-C151  | 75.5(5)   |
| C131-C121-C141-C151 | -48.1(6)  |
| C102-C12-C22-C32    | -178.3(5) |
| C62-C12-C22-C32     | 0.5(8)    |
| C12-C22-C32-C42     | 0.3(8)    |
| C22-C32-C42-C52     | -0.6(8)   |
| C32-C42-C52-C62     | 0.1(8)    |
| C42-C52-C62-C72     | -179.6(5) |
| C42-C52-C62-C12     | 0.7(8)    |
| C102-C12-C62-C72    | -1.8(8)   |
| C22-C12-C62-C72     | 179.3(5)  |
| C102-C12-C62-C52    | 177.9(5)  |
| C22-C12-C62-C52     | -1.0(8)   |
| C52-C62-C72-C82     | -178.7(5) |
| C12-C62-C72-C82     | 1.0(8)    |
| C62-C72-C82-C92     | 1.0(8)    |
| C62-C72-C82-I12     | -178.1(4) |
| C72-C82-C92-C102    | -2.1(8)   |
| I12-C82-C92-C102    | 177.1(4)  |
| C72-C82-C92-C112    | 172.3(5)  |
| I12-C82-C92-C112    | -8.4(6)   |
| C82-C92-C102-C12    | 1.2(8)    |
| C112-C92-C102-C12   | -173.1(5) |
| C22-C12-C102-C92    | 179.5(5)  |
| C62-C12-C102-C92    | 0.7(8)    |
| C122-N12-C112-O22   | 2.7(7)    |
| I12-N12-C112-O22    | -175.5(4) |

|                     |           |
|---------------------|-----------|
| C122-N12-C112-C92   | -173.5(4) |
| I12-N12-C112-C92    | 8.3(5)    |
| C102-C92-C112-O22   | -1.5(8)   |
| C82-C92-C112-O22    | -175.8(5) |
| C102-C92-C112-N12   | 174.8(5)  |
| C82-C92-C112-N12    | 0.5(7)    |
| C112-N12-C122-C132  | -157.9(4) |
| I12-N12-C122-C132   | 20.2(6)   |
| C112-N12-C122-C142  | 78.8(6)   |
| I12-N12-C122-C142   | -103.1(4) |
| I12-O32-C132-O12    | -177.0(4) |
| I12-O32-C132-C122   | 4.0(6)    |
| N12-C122-C132-O12   | 166.7(5)  |
| C142-C122-C132-O12  | -70.7(6)  |
| N12-C122-C132-O32   | -14.2(7)  |
| C142-C122-C132-O32  | 108.4(5)  |
| N12-C122-C142-C152  | 76.2(5)   |
| C132-C122-C142-C152 | -47.1(6)  |
| N12-C122-C142-C162  | -158.3(4) |
| C132-C122-C142-C162 | 78.4(5)   |
| C103-C13-C23-C33    | -178.3(5) |
| C63-C13-C23-C33     | 0.3(7)    |
| C13-C23-C33-C43     | 0.1(8)    |
| C23-C33-C43-C53     | -0.2(8)   |
| C33-C43-C53-C63     | -0.1(8)   |
| C43-C53-C63-C73     | -178.7(5) |
| C43-C53-C63-C13     | 0.6(8)    |
| C103-C13-C63-C53    | 178.1(5)  |
| C23-C13-C63-C53     | -0.6(7)   |
| C103-C13-C63-C73    | -2.7(7)   |
| C23-C13-C63-C73     | 178.6(5)  |
| C53-C63-C73-C83     | -179.0(5) |
| C13-C63-C73-C83     | 1.8(7)    |
| C63-C73-C83-C93     | 0.9(7)    |
| C63-C73-C83-I13     | -178.6(4) |
| C73-C83-C93-C103    | -2.6(7)   |

|                     |           |
|---------------------|-----------|
| I13-C83-C93-C103    | 177.0(4)  |
| C73-C83-C93-C113    | 172.7(4)  |
| I13-C83-C93-C113    | -7.7(5)   |
| C83-C93-C103-C13    | 1.6(7)    |
| C113-C93-C103-C13   | -173.5(4) |
| C23-C13-C103-C93    | 179.6(5)  |
| C63-C13-C103-C93    | 1.0(7)    |
| C123-N13-C113-O23   | 0.5(7)    |
| I13-N13-C113-O23    | -173.6(4) |
| C123-N13-C113-C93   | -175.8(4) |
| I13-N13-C113-C93    | 10.1(5)   |
| C103-C93-C113-O23   | -2.5(7)   |
| C83-C93-C113-O23    | -177.6(4) |
| C103-C93-C113-N13   | 173.9(4)  |
| C83-C93-C113-N13    | -1.3(6)   |
| C113-N13-C123-C133  | -156.6(4) |
| I13-N13-C123-C133   | 17.1(6)   |
| C113-N13-C123-C143  | 79.3(5)   |
| I13-N13-C123-C143   | -107.0(4) |
| N13-C123-C133-O13   | 166.1(5)  |
| C143-C123-C133-O13  | -71.1(6)  |
| N13-C123-C133-O33   | -16.5(7)  |
| C143-C123-C133-O33  | 106.2(5)  |
| N13-C123-C143-C153  | 72.2(6)   |
| C133-C123-C143-C153 | -52.5(6)  |
| N13-C123-C143-C163  | -162.4(4) |
| C133-C123-C143-C163 | 72.9(6)   |
| C104-C14-C24-C34    | -179.1(5) |
| C64-C14-C24-C34     | -0.2(8)   |
| C14-C24-C34-C44     | 0.8(8)    |
| C24-C34-C44-C54     | -0.6(8)   |
| C34-C44-C54-C64     | -0.2(8)   |
| C44-C54-C64-C14     | 0.8(8)    |
| C44-C54-C64-C74     | -178.4(5) |
| C104-C14-C64-C54    | 178.3(5)  |
| C24-C14-C64-C54     | -0.6(7)   |



|                     |           |
|---------------------|-----------|
| C104-C14-C64-C74    | -2.4(7)   |
| C24-C14-C64-C74     | 178.6(5)  |
| C54-C64-C74-C84     | -179.5(5) |
| C14-C64-C74-C84     | 1.2(7)    |
| C64-C74-C84-C94     | 1.2(7)    |
| C64-C74-C84-I14     | -178.3(4) |
| C74-C84-C94-C104    | -2.3(8)   |
| I14-C84-C94-C104    | 177.2(4)  |
| C74-C84-C94-C114    | 172.1(5)  |
| I14-C84-C94-C114    | -8.4(6)   |
| C84-C94-C104-C14    | 1.0(8)    |
| C114-C94-C104-C14   | -173.2(5) |
| C24-C14-C104-C94    | -179.8(5) |
| C64-C14-C104-C94    | 1.3(8)    |
| C124-N14-C114-O24   | 4.3(7)    |
| I14-N14-C114-O24    | -175.4(4) |
| C124-N14-C114-C94   | -171.9(4) |
| I14-N14-C114-C94    | 8.4(5)    |
| C104-C94-C114-O24   | -1.7(8)   |
| C84-C94-C114-O24    | -175.9(5) |
| C104-C94-C114-N14   | 174.5(5)  |
| C84-C94-C114-N14    | 0.3(7)    |
| C114-N14-C124-C134  | -160.7(4) |
| I14-N14-C124-C134   | 18.9(6)   |
| C114-N14-C124-C144  | 75.3(6)   |
| I14-N14-C124-C144   | -105.1(4) |
| I14-O34-C134-O14    | -177.5(5) |
| I14-O34-C134-C124   | 3.7(6)    |
| N14-C124-C134-O14   | 167.8(5)  |
| C144-C124-C134-O14  | -69.8(6)  |
| N14-C124-C134-O34   | -13.3(7)  |
| C144-C124-C134-O34  | 109.1(5)  |
| N14-C124-C144-C154  | -154.6(4) |
| C134-C124-C144-C154 | 81.2(6)   |
| N14-C124-C144-C164  | 79.9(5)   |
| C134-C124-C144-C164 | -44.3(6)  |

|                    |           |
|--------------------|-----------|
| C105-C15-C25-C35   | -178.1(5) |
| C65-C15-C25-C35    | 0.7(8)    |
| C15-C25-C35-C45    | -0.6(8)   |
| C25-C35-C45-C55    | 0.0(8)    |
| C35-C45-C55-C65    | 0.4(8)    |
| C45-C55-C65-C15    | -0.3(8)   |
| C45-C55-C65-C75    | -179.8(5) |
| C105-C15-C65-C55   | 178.6(5)  |
| C25-C15-C65-C55    | -0.2(7)   |
| C105-C15-C65-C75   | -1.9(7)   |
| C25-C15-C65-C75    | 179.2(5)  |
| C55-C65-C75-C85    | 179.9(5)  |
| C15-C65-C75-C85    | 0.5(7)    |
| C65-C75-C85-C95    | 2.0(8)    |
| C65-C75-C85-I15    | -178.5(4) |
| C75-C85-C95-C105   | -3.0(8)   |
| I15-C85-C95-C105   | 177.5(4)  |
| C75-C85-C95-C115   | 173.1(5)  |
| I15-C85-C95-C115   | -6.5(5)   |
| C85-C95-C105-C15   | 1.4(7)    |
| C115-C95-C105-C15  | -174.5(4) |
| C25-C15-C105-C95   | 179.7(5)  |
| C65-C15-C105-C95   | 1.0(7)    |
| C125-N15-C115-O25  | 1.8(7)    |
| I15-N15-C115-O25   | -175.5(4) |
| C125-N15-C115-C95  | -174.1(4) |
| I15-N15-C115-C95   | 8.6(5)    |
| C105-C95-C115-O25  | -1.2(8)   |
| C85-C95-C115-O25   | -177.1(5) |
| C105-C95-C115-N15  | 174.8(5)  |
| C85-C95-C115-N15   | -1.2(6)   |
| C115-N15-C125-C135 | -158.0(5) |
| I15-N15-C125-C135  | 19.2(6)   |
| C115-N15-C125-C145 | 77.3(6)   |
| I15-N15-C125-C145  | -105.5(4) |
| I15-O35-C135-O15   | -171.1(4) |

|                     |           |
|---------------------|-----------|
| I15-O35-C135-C125   | 11.3(6)   |
| N15-C125-C135-O15   | 163.0(5)  |
| C145-C125-C135-O15  | -74.4(6)  |
| N15-C125-C135-O35   | -19.2(7)  |
| C145-C125-C135-O35  | 103.4(6)  |
| N15-C125-C145-C155  | -161.0(4) |
| C135-C125-C145-C155 | 74.8(6)   |
| N15-C125-C145-C165  | 73.9(5)   |
| C135-C125-C145-C165 | -50.3(6)  |
| C106-C16-C26-C36    | -178.4(5) |
| C66-C16-C26-C36     | 0.5(7)    |
| C16-C26-C36-C46     | 0.6(8)    |
| C26-C36-C46-C56     | -1.1(8)   |
| C36-C46-C56-C66     | 0.5(8)    |
| C46-C56-C66-C16     | 0.6(7)    |
| C46-C56-C66-C76     | -178.7(5) |
| C26-C16-C66-C56     | -1.1(7)   |
| C106-C16-C66-C56    | 177.9(5)  |
| C26-C16-C66-C76     | 178.2(5)  |
| C106-C16-C66-C76    | -2.8(7)   |
| C56-C66-C76-C86     | -179.1(5) |
| C16-C66-C76-C86     | 1.6(7)    |
| C66-C76-C86-C96     | 1.1(8)    |
| C66-C76-C86-I16     | -177.1(3) |
| C76-C86-C96-C106    | -2.5(8)   |
| I16-C86-C96-C106    | 175.9(4)  |
| C76-C86-C96-C116    | 172.3(5)  |
| I16-C86-C96-C116    | -9.2(6)   |
| C86-C96-C106-C16    | 1.2(7)    |
| C116-C96-C106-C16   | -173.5(4) |
| C26-C16-C106-C96    | -179.7(5) |
| C66-C16-C106-C96    | 1.4(7)    |
| C126-N16-C116-O26   | 2.0(8)    |
| I16-N16-C116-O26    | -172.8(4) |
| C126-N16-C116-C96   | -175.0(4) |
| I16-N16-C116-C96    | 10.3(5)   |

|                     |            |
|---------------------|------------|
| C106-C96-C116-O26   | -2.7(8)    |
| C86-C96-C116-O26    | -177.4(5)  |
| C106-C96-C116-N16   | 174.3(5)   |
| C86-C96-C116-N16    | -0.4(6)    |
| C116-N16-C126-C136  | -156.6(5)  |
| I16-N16-C126-C136   | 17.8(6)    |
| C116-N16-C126-C146  | 78.7(6)    |
| I16-N16-C126-C146   | -106.9(4)  |
| N16-C126-C136-O16   | 165.8(5)   |
| C146-C126-C136-O16  | -71.3(6)   |
| N16-C126-C136-O36   | -16.5(7)   |
| C146-C126-C136-O36  | 106.5(6)   |
| N16-C126-C146-C156  | -164.1(5)  |
| C136-C126-C146-C156 | 71.3(6)    |
| N16-C126-C146-C166  | 70.6(6)    |
| C136-C126-C146-C166 | -54.0(6)   |
| C37-N17-C17-C27     | -171.7(10) |
| C77-N17-C17-C27     | 67.6(12)   |
| C57-N17-C17-C27     | -50.3(12)  |
| C77-N17-C37-C47     | -64.0(10)  |
| C57-N17-C37-C47     | 53.9(11)   |
| C17-N17-C37-C47     | 175.4(8)   |
| C37-N17-C57-C67     | 58.2(10)   |
| C77-N17-C57-C67     | 178.7(7)   |
| C17-N17-C57-C67     | -60.9(10)  |
| C37-N17-C77-C87     | -52.7(12)  |
| C57-N17-C77-C87     | -173.3(10) |
| C17-N17-C77-C87     | 65.9(12)   |
| C3A8-N1A8-C1A8-C2A8 | -174(4)    |
| C7A8-N1A8-C1A8-C2A8 | -53(4)     |
| C5A8-N1A8-C1A8-C2A8 | 62(4)      |
| C7A8-N1A8-C3A8-C4A8 | 62(4)      |
| C5A8-N1A8-C3A8-C4A8 | -56(4)     |
| C1A8-N1A8-C3A8-C4A8 | -178(3)    |
| C3A8-N1A8-C5A8-C6A8 | -45(4)     |
| C7A8-N1A8-C5A8-C6A8 | -167(3)    |

|                     |           |
|---------------------|-----------|
| C1A8-N1A8-C5A8-C6A8 | 76(4)     |
| C3A8-N1A8-C7A8-C8A8 | 46(5)     |
| C5A8-N1A8-C7A8-C8A8 | 168(4)    |
| C1A8-N1A8-C7A8-C8A8 | -74(5)    |
| C39-N19-C19-C29     | 55.1(6)   |
| C59-N19-C19-C29     | 174.0(5)  |
| C79-N19-C19-C29     | -64.2(6)  |
| C19-N19-C39-C49     | 56.4(6)   |
| C59-N19-C39-C49     | -64.0(6)  |
| C79-N19-C39-C49     | 174.6(5)  |
| C19-N19-C59-C69     | 70.2(6)   |
| C39-N19-C59-C69     | -169.1(5) |
| C79-N19-C59-C69     | -49.1(7)  |
| C19-N19-C79-C89     | -174.1(5) |
| C39-N19-C79-C89     | 65.8(6)   |
| C59-N19-C79-C89     | -53.2(6)  |
| C310-N110-C110-C210 | 51.6(7)   |
| C510-N110-C110-C210 | 174.3(5)  |
| C710-N110-C110-C210 | -66.0(6)  |
| C510-N110-C310-C410 | -57.9(7)  |
| C110-N110-C310-C410 | 61.8(6)   |
| C710-N110-C310-C410 | -177.6(5) |
| C310-N110-C510-C610 | -58.4(7)  |
| C110-N110-C510-C610 | 178.8(5)  |
| C710-N110-C510-C610 | 58.6(6)   |
| C310-N110-C710-C810 | 172.6(5)  |
| C510-N110-C710-C810 | 51.7(7)   |
| C110-N110-C710-C810 | -66.0(6)  |
| C711-N111-C111-C211 | -170.6(4) |
| C511-N111-C111-C211 | 68.0(5)   |
| C311-N111-C111-C211 | -51.0(6)  |
| C711-N111-C311-C411 | 61.8(6)   |
| C511-N111-C311-C411 | -177.2(4) |
| C111-N111-C311-C411 | -57.0(6)  |
| C711-N111-C511-C611 | 61.8(6)   |
| C111-N111-C511-C611 | -179.1(5) |

|                         |            |
|-------------------------|------------|
| C311-N111-C511-C611     | -57.7(6)   |
| C511-N111-C711-C811     | 56.8(6)    |
| C111-N111-C711-C811     | -63.4(6)   |
| C311-N111-C711-C811     | 175.4(5)   |
| C512-N112-C112-C212     | -56(2)     |
| C712-N112-C112-C212     | -177(2)    |
| C312-N112-C112-C212     | 62(2)      |
| C512-N112-C312-C412     | -169.4(15) |
| C112-N112-C312-C412     | 69.5(17)   |
| C712-N112-C312-C412     | -50.0(18)  |
| C112-N112-C512-C612     | -62.0(17)  |
| C712-N112-C512-C612     | 58.7(17)   |
| C312-N112-C512-C612     | 178.4(13)  |
| C512-N112-C712-C812     | 52.6(18)   |
| C112-N112-C712-C812     | 175.2(15)  |
| C312-N112-C712-C812     | -64.8(18)  |
| C5A13-N1A13-C1A13-C2A13 | -54(2)     |
| C7A13-N1A13-C1A13-C2A13 | -175.1(17) |
| C3A13-N1A13-C1A13-C2A13 | 64(2)      |
| C5A13-N1A13-C3A13-C4A13 | 169(2)     |
| C7A13-N1A13-C3A13-C4A13 | -68(3)     |
| C1A13-N1A13-C3A13-C4A13 | 49(3)      |
| C7A13-N1A13-C5A13-C6A13 | 57(2)      |
| C3A13-N1A13-C5A13-C6A13 | 179.5(16)  |
| C1A13-N1A13-C5A13-C6A13 | -61.1(19)  |
| C5A13-N1A13-C7A13-C8A13 | 54(2)      |
| C3A13-N1A13-C7A13-C8A13 | -67(2)     |
| C1A13-N1A13-C7A13-C8A13 | 174(2)     |
| C314-N114-C114-C214     | -59(2)     |
| C714-N114-C114-C214     | 178.7(18)  |
| C514-N114-C114-C214     | 61(2)      |
| C714-N114-C314-C414     | 61(3)      |
| C114-N114-C314-C414     | -59(3)     |
| C514-N114-C314-C414     | 179(3)     |
| C314-N114-C514-C614     | -171(2)    |
| C714-N114-C514-C614     | -52(3)     |

|                         |            |
|-------------------------|------------|
| C114-N114-C514-C614     | 65(3)      |
| C314-N114-C714-C814     | 58(2)      |
| C114-N114-C714-C814     | -177.5(17) |
| C514-N114-C714-C814     | -58(2)     |
| C7A15-N1A15-C1A15-C2A15 | 179(2)     |
| C5A15-N1A15-C1A15-C2A15 | 57(2)      |
| C3A15-N1A15-C1A15-C2A15 | -61(2)     |
| C7A15-N1A15-C3A15-C4A15 | 49(3)      |
| C5A15-N1A15-C3A15-C4A15 | 173(3)     |
| C1A15-N1A15-C3A15-C4A15 | -68(3)     |
| C7A15-N1A15-C5A15-C6A15 | -56(3)     |
| C3A15-N1A15-C5A15-C6A15 | -179(3)    |
| C1A15-N1A15-C5A15-C6A15 | 63(3)      |
| C5A15-N1A15-C7A15-C8A15 | -57(2)     |
| C3A15-N1A15-C7A15-C8A15 | 64(2)      |
| C1A15-N1A15-C7A15-C8A15 | -177.1(19) |

---

Symmetry transformations used to generate equivalent atoms:

Table 7. Hydrogen bonds for 4536ds [ $\text{\AA}$  and  $^\circ$ ].

| D-H...A          | d(D-H)  | d(H...A) | d(D...A) | $\angle(\text{DHA})$ |
|------------------|---------|----------|----------|----------------------|
| O(1)-H(1E)...O13 | 0.87(5) | 1.93(5)  | 2.795(6) | 175(8)               |
| O(1)-H(1F)...O34 | 0.86(5) | 2.06(5)  | 2.909(6) | 168(8)               |
| O(2)-H(2H)...O15 | 0.97(7) | 1.92(7)  | 2.869(6) | 166(7)               |

Symmetry transformations used to generate equivalent atoms:



**University of Illinois, Department of Chemistry  
George L. Clark X- R Facility and 3M Materials Laboratory**

Structure report for compound **Valine HIM in Naphthalene System 6b/C60**

|                         |                               |
|-------------------------|-------------------------------|
| Identification code     | CCDC 2388283                  |
| Empirical formula       | C284 H97 Cl12 I6 N6 O19       |
| Principal Investigator: | Professor Dr. Kyle N Plunkett |

**List of Tables**

Table 1. Crystallographic Experimental Details

Table 2. Atomic Coordinates and Equivalent Isotropic Displacement Parameters

Table 3. Selected Interatomic Distances and Selected Interatomic Angles

Table 4. Anisotropic Displacement Parameters

Table 5. Derived Atomic Coordinates and Displacement Parameters for Hydrogen Atoms

Table 6. Torsional Angles

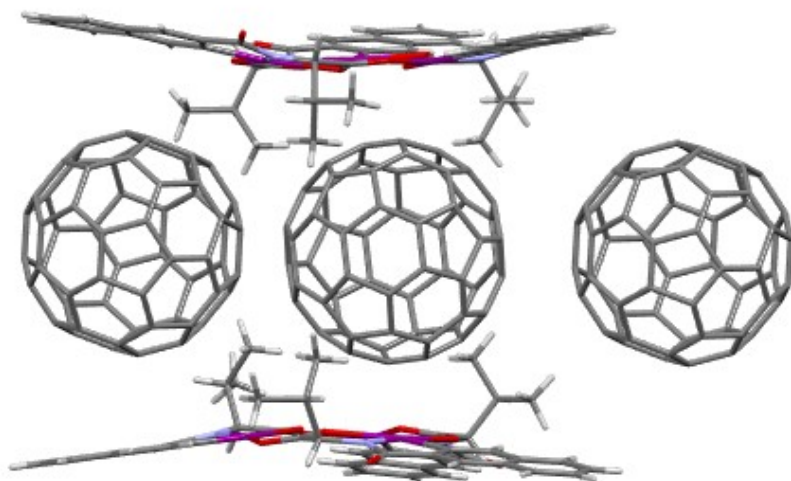

**Figure SI20:** Perspective view of crystallographically independent molecules of Valine HIM in Naphthalene system. Solvent is removed for clarity. Nitrogen, oxygen and iodine atoms are denoted by light blue, red and purple color respectively. Hydrogens atoms are omitted. (Capped sticks style)

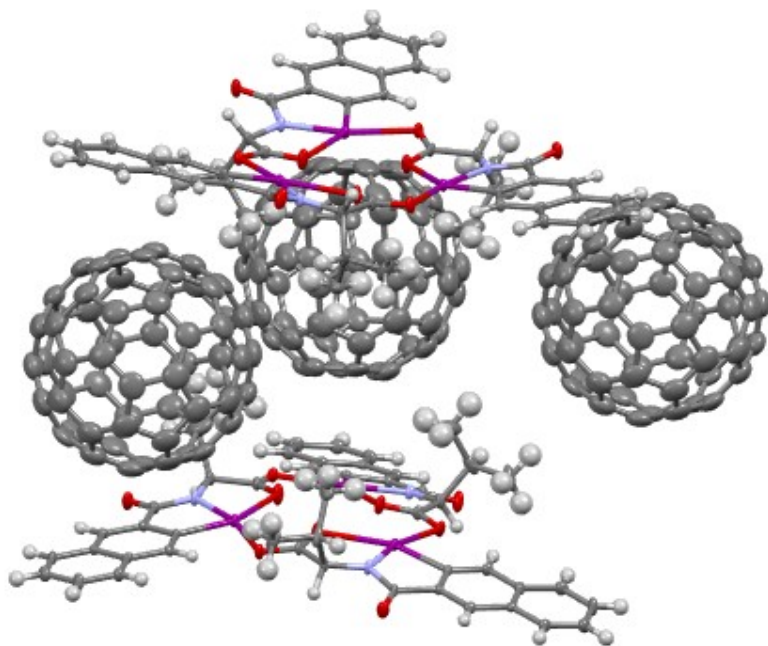

**Figure SI21:** Perspective view of crystallographically independent molecules of Valine HIM in Naphthalene system. Solvent is removed for clarity. Nitrogen, oxygen and iodine atoms are denoted by light blue, red and purple color respectively. Hydrogens atoms are omitted. (Ellipsoid style)

Table 1. Crystal data and structure refinement for 19949ds\_sq.

|                                   |                                                                                                 |                  |
|-----------------------------------|-------------------------------------------------------------------------------------------------|------------------|
| Identification code               | CCDC 2388283                                                                                    |                  |
| Empirical formula                 | C <sub>284</sub> H <sub>97</sub> Cl <sub>12</sub> I <sub>6</sub> N <sub>6</sub> O <sub>19</sub> |                  |
| Formula weight                    | 5083.47                                                                                         |                  |
| Temperature                       | 100(2) K                                                                                        |                  |
| Wavelength                        | 0.71073 Å                                                                                       |                  |
| Crystal system                    | Monoclinic                                                                                      |                  |
| Space group                       | I2                                                                                              |                  |
| Unit cell dimensions              | a = 18.9051(5) Å                                                                                | a = 90°.         |
|                                   | b = 18.3265(4) Å                                                                                | b = 95.6366(4)°. |
|                                   | c = 27.6546(9) Å                                                                                | g = 90°.         |
| Volume                            | 9535.0(5) Å <sup>3</sup>                                                                        |                  |
| Z                                 | 2                                                                                               |                  |
| Density (calculated)              | 1.771 Mg/m <sup>3</sup>                                                                         |                  |
| Absorption coefficient            | 1.229 mm <sup>-1</sup>                                                                          |                  |
| F(000)                            | 5034                                                                                            |                  |
| Crystal size                      | 0.187 x 0.137 x 0.050 mm <sup>3</sup>                                                           |                  |
| Theta range for data collection   | 2.373 to 28.329°.                                                                               |                  |
| Index ranges                      | -25<=h<=25, -24<=k<=24, -36<=l<=36                                                              |                  |
| Reflections collected             | 182786                                                                                          |                  |
| Independent reflections           | 23780 [R(int) = 0.0439]                                                                         |                  |
| Completeness to theta = 25.242°   | 99.9 %                                                                                          |                  |
| Absorption correction             | Semi-empirical from equivalents                                                                 |                  |
| Max. and min. transmission        | 0.7457 and 0.7079                                                                               |                  |
| Refinement method                 | Full-matrix least-squares on F <sup>2</sup>                                                     |                  |
| Data / restraints / parameters    | 23780 / 3457 / 1783                                                                             |                  |
| Goodness-of-fit on F <sup>2</sup> | 1.060                                                                                           |                  |
| Final R indices [I>2sigma(I)]     | R1 = 0.0483, wR2 = 0.1327                                                                       |                  |
| R indices (all data)              | R1 = 0.0497, wR2 = 0.1340                                                                       |                  |
| Absolute structure parameter      | 0.000(3)                                                                                        |                  |
| Extinction coefficient            | n/a                                                                                             |                  |
| Largest diff. peak and hole       | 2.014 and -1.510 e.Å <sup>-3</sup>                                                              |                  |

Table 2. Atomic coordinates ( $\times 10^4$ ) and equivalent isotropic displacement parameters ( $\text{\AA}^2 \times 10^3$ ) for 19949ds\_sq.  $U(\text{eq})$  is defined as one third of the trace of the orthogonalized  $U^{ij}$  tensor.

|       | x        | y       | z       | U(eq) |
|-------|----------|---------|---------|-------|
| I(1)  | 6844(1)  | 5120(1) | 3146(1) | 14(1) |
| I(2)  | 7409(1)  | 2420(1) | 3725(1) | 14(1) |
| I(3)  | 8436(1)  | 4653(1) | 4786(1) | 13(1) |
| Cl(1) | 9922(1)  | 3754(2) | 6948(1) | 36(1) |
| Cl(2) | 10807(2) | 3548(2) | 7854(1) | 39(1) |
| Cl(3) | 10504(1) | 5004(1) | 7494(1) | 38(1) |
| O(1)  | 8133(3)  | 5832(3) | 4504(2) | 18(1) |
| O(2)  | 7515(4)  | 5109(4) | 3979(2) | 28(1) |
| O(3)  | 7082(3)  | 7378(3) | 3106(2) | 24(1) |
| O(4)  | 6491(3)  | 4095(3) | 2671(2) | 18(1) |
| O(5)  | 6949(4)  | 3614(3) | 3370(2) | 24(1) |
| O(6)  | 6613(3)  | 1348(3) | 2454(2) | 23(1) |
| O(7)  | 8135(3)  | 2282(3) | 4453(2) | 20(1) |
| O(8)  | 7927(3)  | 3476(3) | 4433(2) | 23(1) |
| O(9)  | 9879(4)  | 3453(3) | 5709(3) | 28(1) |
| N(1)  | 7041(4)  | 6203(3) | 3383(2) | 16(1) |
| N(2)  | 6820(4)  | 2224(3) | 3047(2) | 16(1) |
| N(3)  | 8917(3)  | 3765(4) | 5185(2) | 16(1) |
| C(1)  | 7701(4)  | 5727(4) | 4125(3) | 17(1) |
| C(2)  | 7386(4)  | 6394(4) | 3862(3) | 15(1) |
| C(3)  | 6920(4)  | 6735(4) | 3044(3) | 17(1) |
| C(4)  | 6535(4)  | 6454(4) | 2578(3) | 14(1) |
| C(5)  | 6289(4)  | 6911(4) | 2208(3) | 16(1) |
| C(6)  | 5909(4)  | 6631(4) | 1782(3) | 14(1) |
| C(7)  | 5644(4)  | 7090(4) | 1391(3) | 19(1) |
| C(8)  | 5279(4)  | 6801(5) | 981(3)  | 23(2) |
| C(9)  | 5166(5)  | 6038(5) | 944(3)  | 24(2) |
| C(10) | 5408(4)  | 5575(4) | 1321(3) | 19(2) |
| C(11) | 5790(4)  | 5867(4) | 1742(3) | 16(1) |
| C(12) | 6048(4)  | 5395(4) | 2129(3) | 14(1) |
| C(13) | 6408(4)  | 5702(4) | 2536(3) | 12(1) |

|       |          |          |         |       |
|-------|----------|----------|---------|-------|
| C(14) | 6859(5)  | 6780(5)  | 4175(3) | 29(2) |
| C(15) | 7243(6)  | 7232(5)  | 4586(3) | 34(2) |
| C(16) | 6353(6)  | 6240(8)  | 4373(4) | 40(2) |
| C(17) | 6654(4)  | 3546(4)  | 2951(3) | 16(1) |
| C(18) | 6464(4)  | 2792(4)  | 2739(3) | 16(1) |
| C(19) | 6857(4)  | 1533(4)  | 2864(3) | 14(1) |
| C(20) | 7223(4)  | 1011(4)  | 3224(3) | 13(1) |
| C(21) | 7254(4)  | 272(4)   | 3125(3) | 15(1) |
| C(22) | 7619(4)  | -200(4)  | 3469(3) | 15(1) |
| C(23) | 7665(4)  | -964(4)  | 3377(3) | 19(1) |
| C(24) | 8032(5)  | -1404(4) | 3706(3) | 24(2) |
| C(25) | 8370(5)  | -1115(5) | 4144(3) | 25(2) |
| C(26) | 8336(4)  | -380(5)  | 4247(3) | 22(2) |
| C(27) | 7960(4)  | 97(4)    | 3907(3) | 17(1) |
| C(28) | 7919(4)  | 853(4)   | 4007(3) | 17(1) |
| C(29) | 7552(4)  | 1289(4)  | 3666(3) | 13(1) |
| C(30) | 5647(5)  | 2684(5)  | 2694(4) | 28(2) |
| C(31) | 5263(6)  | 3156(5)  | 2288(4) | 35(2) |
| C(32) | 5332(6)  | 2814(7)  | 3164(4) | 41(2) |
| C(33) | 8231(4)  | 2923(4)  | 4622(3) | 17(1) |
| C(34) | 8726(4)  | 2994(4)  | 5089(3) | 18(1) |
| C(35) | 9490(4)  | 3931(4)  | 5500(3) | 18(1) |
| C(36) | 9601(4)  | 4723(4)  | 5571(2) | 14(1) |
| C(37) | 10102(4) | 4995(4)  | 5918(3) | 17(1) |
| C(38) | 10196(4) | 5758(4)  | 5971(3) | 14(1) |
| C(39) | 10695(4) | 6056(5)  | 6338(3) | 19(2) |
| C(40) | 10775(4) | 6796(5)  | 6385(3) | 23(2) |
| C(41) | 10381(4) | 7274(5)  | 6059(3) | 22(2) |
| C(42) | 9893(4)  | 7002(5)  | 5697(3) | 20(2) |
| C(43) | 9788(4)  | 6246(4)  | 5648(3) | 15(1) |
| C(44) | 9262(4)  | 5957(4)  | 5292(3) | 14(1) |
| C(45) | 9171(4)  | 5211(4)  | 5271(2) | 13(1) |
| C(46) | 8399(6)  | 2653(5)  | 5526(3) | 28(2) |
| C(47) | 7670(7)  | 2952(7)  | 5578(5) | 47(3) |
| C(48) | 8382(6)  | 1818(6)  | 5503(4) | 39(3) |
| C(49) | 10171(6) | 4102(6)  | 7534(4) | 36(2) |

|        |         |         |         |       |
|--------|---------|---------|---------|-------|
| C(115) | 5957(3) | 4479(3) | 6491(2) | 71(3) |
| C(116) | 6608(3) | 4389(3) | 6257(2) | 73(3) |
| C(117) | 5501(3) | 5037(3) | 6354(2) | 70(3) |
| C(118) | 6763(3) | 4862(3) | 5900(2) | 72(3) |
| C(119) | 7485(3) | 5130(3) | 5888(2) | 61(3) |
| C(120) | 7164(3) | 4154(2) | 6624(2) | 69(3) |
| C(121) | 7843(3) | 4406(3) | 6613(2) | 67(3) |
| C(122) | 8008(3) | 4909(3) | 6234(2) | 68(3) |
| C(123) | 5315(2) | 5282(4) | 7200(2) | 70(3) |
| C(124) | 5800(3) | 4689(3) | 7346(2) | 68(3) |
| C(125) | 5170(2) | 5451(4) | 6719(2) | 65(3) |
| C(126) | 6111(3) | 4300(3) | 7002(2) | 69(3) |
| C(127) | 6857(3) | 4099(2) | 7085(2) | 72(3) |
| C(128) | 6215(3) | 4902(3) | 7794(2) | 69(3) |
| C(129) | 6917(3) | 4713(3) | 7872(2) | 70(3) |
| C(130) | 7247(3) | 4299(3) | 7506(2) | 72(3) |
| C(131) | 5239(2) | 6755(4) | 6902(2) | 74(3) |
| C(132) | 5394(3) | 6575(4) | 7414(2) | 68(3) |
| C(133) | 5131(2) | 6210(4) | 6566(2) | 74(3) |
| C(134) | 5430(3) | 5862(4) | 7558(2) | 71(3) |
| C(135) | 5987(3) | 5627(4) | 7925(2) | 70(3) |
| C(136) | 5911(3) | 7099(3) | 7627(2) | 75(3) |
| C(137) | 6434(3) | 6878(4) | 7973(2) | 67(3) |
| C(138) | 6473(3) | 6119(4) | 8126(2) | 72(3) |
| C(139) | 5835(3) | 6861(4) | 6009(2) | 68(3) |
| C(140) | 5950(3) | 7441(3) | 6367(2) | 75(3) |
| C(141) | 5438(3) | 6265(4) | 6105(2) | 73(3) |
| C(142) | 5661(3) | 7389(3) | 6800(2) | 67(3) |
| C(143) | 6076(3) | 7602(3) | 7248(2) | 72(3) |
| C(144) | 6671(3) | 7709(3) | 6355(2) | 70(3) |
| C(145) | 7062(4) | 7909(2) | 6776(2) | 74(3) |
| C(146) | 6755(4) | 7854(2) | 7237(2) | 71(3) |
| C(147) | 6278(3) | 5455(4) | 5755(2) | 74(3) |
| C(148) | 6700(3) | 6090(4) | 5652(1) | 66(3) |
| C(149) | 5666(3) | 5540(4) | 5974(2) | 74(3) |
| C(150) | 6485(3) | 6771(4) | 5776(2) | 69(3) |

|        |         |         |         |       |
|--------|---------|---------|---------|-------|
| C(151) | 7002(3) | 7295(3) | 5989(2) | 69(3) |
| C(152) | 7446(3) | 5889(4) | 5735(2) | 68(3) |
| C(153) | 7932(3) | 6381(4) | 5936(2) | 65(3) |
| C(154) | 7704(3) | 7106(3) | 6067(2) | 68(3) |
| C(155) | 7962(3) | 7528(3) | 7370(2) | 73(3) |
| C(156) | 7807(3) | 7708(3) | 6859(2) | 68(3) |
| C(157) | 8119(3) | 7319(3) | 6515(2) | 68(3) |
| C(158) | 8418(3) | 6971(3) | 7507(2) | 73(3) |
| C(159) | 7641(3) | 6553(4) | 8106(2) | 74(3) |
| C(160) | 7155(4) | 7146(3) | 7961(2) | 76(3) |
| C(161) | 7311(4) | 7619(3) | 7604(2) | 79(3) |
| C(162) | 8252(3) | 6468(4) | 7887(2) | 71(3) |
| C(163) | 8084(3) | 5146(4) | 7852(2) | 65(3) |
| C(164) | 7434(3) | 5237(4) | 8085(2) | 68(3) |
| C(165) | 7219(3) | 5918(4) | 8209(1) | 68(3) |
| C(166) | 8481(3) | 5743(4) | 7756(2) | 69(3) |
| C(167) | 8679(2) | 5253(4) | 6959(2) | 70(3) |
| C(168) | 8258(3) | 4619(3) | 7061(2) | 65(3) |
| C(169) | 7969(3) | 4567(3) | 7494(2) | 72(3) |
| C(170) | 8788(2) | 5798(4) | 7295(2) | 70(3) |
| C(171) | 8604(2) | 6726(3) | 6661(2) | 66(3) |
| C(172) | 8488(3) | 6146(4) | 6303(2) | 62(3) |
| C(173) | 8525(3) | 5433(4) | 6447(2) | 64(3) |
| C(174) | 8749(2) | 6557(4) | 7142(2) | 65(3) |
| C(215) | 5954(5) | 4979(5) | 7708(3) | 70(3) |
| C(216) | 6431(5) | 4434(5) | 7540(4) | 67(3) |
| C(217) | 5423(4) | 5266(6) | 7393(4) | 69(3) |
| C(218) | 6350(5) | 4208(4) | 7066(4) | 66(3) |
| C(219) | 6971(6) | 4104(4) | 6803(4) | 68(3) |
| C(220) | 7138(6) | 4569(5) | 7779(3) | 73(3) |
| C(221) | 7722(5) | 4471(5) | 7531(4) | 71(3) |
| C(222) | 7635(5) | 4231(4) | 7028(4) | 72(3) |
| C(223) | 5658(5) | 6487(6) | 7726(3) | 71(3) |
| C(224) | 6222(5) | 6182(6) | 8060(3) | 69(3) |
| C(225) | 5271(4) | 6043(6) | 7402(4) | 69(3) |
| C(226) | 6366(5) | 5451(6) | 8052(3) | 68(3) |

|        |         |         |         |       |
|--------|---------|---------|---------|-------|
| C(227) | 7098(6) | 5198(6) | 8096(3) | 71(4) |
| C(228) | 6802(6) | 6706(6) | 8113(3) | 74(3) |
| C(229) | 7491(6) | 6467(6) | 8155(3) | 75(4) |
| C(230) | 7643(5) | 5690(6) | 8146(3) | 72(4) |
| C(231) | 5308(4) | 6953(6) | 6760(4) | 71(3) |
| C(232) | 5720(5) | 7425(5) | 7103(4) | 70(3) |
| C(233) | 5090(3) | 6283(6) | 6905(4) | 64(3) |
| C(234) | 5889(5) | 7199(5) | 7572(4) | 73(3) |
| C(235) | 6596(6) | 7334(5) | 7811(3) | 74(3) |
| C(236) | 6246(5) | 7800(4) | 6845(4) | 72(3) |
| C(237) | 6911(6) | 7927(4) | 7071(4) | 69(3) |
| C(238) | 7091(6) | 7687(4) | 7568(4) | 75(4) |
| C(239) | 5387(4) | 5733(6) | 6145(3) | 72(3) |
| C(240) | 5618(5) | 6445(6) | 5991(3) | 72(3) |
| C(241) | 5131(3) | 5654(6) | 6588(4) | 69(3) |
| C(242) | 5580(4) | 7036(5) | 6289(4) | 73(3) |
| C(243) | 6159(5) | 7560(5) | 6342(4) | 73(4) |
| C(244) | 6238(5) | 6340(6) | 5728(3) | 72(3) |
| C(245) | 6784(5) | 6833(6) | 5778(3) | 71(3) |
| C(246) | 6743(5) | 7462(5) | 6094(3) | 72(3) |
| C(247) | 5786(5) | 4513(5) | 6732(4) | 67(4) |
| C(248) | 6058(5) | 4597(5) | 6261(4) | 72(4) |
| C(249) | 5337(4) | 5026(5) | 6890(4) | 67(3) |
| C(250) | 5864(5) | 5188(6) | 5977(3) | 75(3) |
| C(251) | 6391(5) | 5564(6) | 5719(3) | 74(4) |
| C(252) | 6790(6) | 4344(4) | 6305(4) | 73(4) |
| C(253) | 7285(5) | 4697(5) | 6062(3) | 71(3) |
| C(254) | 7079(5) | 5325(6) | 5760(3) | 72(3) |
| C(255) | 7927(5) | 7052(5) | 6165(3) | 66(3) |
| C(256) | 7516(5) | 6580(6) | 5821(3) | 67(3) |
| C(257) | 7659(5) | 5849(6) | 5813(3) | 66(3) |
| C(258) | 8458(4) | 6765(5) | 6480(4) | 64(3) |
| C(259) | 8095(5) | 7518(5) | 7142(4) | 67(4) |
| C(260) | 7531(5) | 7823(4) | 6807(4) | 66(3) |
| C(261) | 7450(5) | 7597(4) | 6334(4) | 66(3) |
| C(262) | 8544(4) | 7005(5) | 6983(4) | 66(3) |



|        |         |          |         |        |
|--------|---------|----------|---------|--------|
| C(263) | 8494(4) | 6298(6)  | 7728(3) | 73(3)  |
| C(264) | 8017(5) | 6843(6)  | 7896(3) | 76(3)  |
| C(265) | 7823(5) | 7434(5)  | 7612(4) | 75(4)  |
| C(266) | 8750(4) | 6376(6)  | 7285(4) | 69(3)  |
| C(267) | 8573(4) | 5078(5)  | 7114(4) | 70(3)  |
| C(268) | 8302(5) | 4994(5)  | 7584(3) | 72(3)  |
| C(269) | 8263(5) | 5586(6)  | 7882(3) | 72(4)  |
| C(270) | 8791(3) | 5748(6)  | 6969(4) | 65(4)  |
| C(271) | 8223(5) | 5544(6)  | 6148(3) | 65(3)  |
| C(272) | 7992(5) | 4832(5)  | 6302(4) | 70(3)  |
| C(273) | 8162(5) | 4606(5)  | 6770(4) | 68(3)  |
| C(274) | 8610(4) | 5988(6)  | 6471(4) | 65(3)  |
| C(55)  | 6568(4) | 9240(5)  | 4942(4) | 97(6)  |
| C(56)  | 6538(4) | 9298(5)  | 5464(4) | 102(6) |
| C(57)  | 6704(4) | 9845(5)  | 4677(4) | 91(5)  |
| C(58)  | 6645(4) | 9958(5)  | 5690(4) | 91(6)  |
| C(59)  | 6200(5) | 10178(5) | 6064(3) | 99(6)  |
| C(60)  | 5979(5) | 8817(4)  | 5598(4) | 103(6) |
| C(61)  | 5560(6) | 9024(4)  | 5950(3) | 91(6)  |
| C(62)  | 5674(6) | 9725(5)  | 6190(3) | 87(5)  |
| C(63)  | 5798(5) | 9483(5)  | 4030(3) | 68(5)  |
| C(64)  | 5654(5) | 8840(4)  | 4312(4) | 92(5)  |
| C(65)  | 6307(5) | 9970(5)  | 4207(4) | 80(5)  |
| C(66)  | 6027(5) | 8722(4)  | 4754(4) | 110(6) |
| C(67)  | 5663(5) | 8461(3)  | 5159(4) | 91(6)  |
| C(68)  | 4893(5) | 8704(4)  | 4248(4) | 88(5)  |
| C(69)  | 4551(5) | 8458(3)  | 4629(4) | 99(6)  |
| C(70)  | 4947(6) | 8332(3)  | 5099(4) | 103(6) |
| C(71)  | 5545(6) | 10995(5) | 3932(3) | 89(6)  |
| C(72)  | 5004(6) | 10477(5) | 3744(3) | 81(5)  |
| C(73)  | 6176(5) | 10749(5) | 4157(4) | 92(6)  |
| C(74)  | 5127(6) | 9744(5)  | 3792(3) | 71(5)  |
| C(75)  | 4568(5) | 9263(5)  | 3926(3) | 90(5)  |
| C(76)  | 4314(6) | 10774(5) | 3828(3) | 87(6)  |
| C(77)  | 3788(5) | 10321(5) | 3954(3) | 101(6) |
| C(78)  | 3918(5) | 9542(5)  | 4005(3) | 87(5)  |

|        |         |          |         |        |
|--------|---------|----------|---------|--------|
| C(79)  | 6157(5) | 11686(4) | 4784(4) | 110(6) |
| C(80)  | 5486(6) | 11947(4) | 4545(4) | 99(6)  |
| C(81)  | 6492(4) | 11105(5) | 4596(4) | 87(5)  |
| C(82)  | 5189(6) | 11612(4) | 4132(3) | 101(6) |
| C(83)  | 4428(6) | 11476(4) | 4068(3) | 88(5)  |
| C(84)  | 5041(6) | 12167(3) | 4919(4) | 101(6) |
| C(85)  | 4325(5) | 12039(3) | 4859(4) | 86(5)  |
| C(86)  | 4009(5) | 11683(4) | 4420(4) | 95(6)  |
| C(87)  | 6790(4) | 10601(5) | 5408(4) | 92(5)  |
| C(88)  | 6434(4) | 11219(5) | 5608(4) | 77(5)  |
| C(89)  | 6818(4) | 10546(5) | 4917(4) | 88(5)  |
| C(90)  | 6127(5) | 11745(4) | 5306(4) | 89(5)  |
| C(91)  | 5437(5) | 12042(3) | 5389(4) | 100(6) |
| C(92)  | 6070(5) | 10957(5) | 6013(3) | 79(5)  |
| C(93)  | 5420(5) | 11237(5) | 6092(3) | 80(5)  |
| C(94)  | 5094(5) | 11796(4) | 5771(4) | 86(5)  |
| C(95)  | 3420(4) | 11260(5) | 5076(4) | 100(6) |
| C(96)  | 3961(5) | 11778(4) | 5264(4) | 109(6) |
| C(97)  | 4334(5) | 11660(4) | 5706(4) | 84(5)  |
| C(98)  | 3284(4) | 10655(5) | 5341(4) | 96(6)  |
| C(99)  | 3198(4) | 9898(5)  | 4610(4) | 96(6)  |
| C(100) | 3343(4) | 10541(5) | 4328(4) | 91(6)  |
| C(101) | 3450(4) | 11201(5) | 4554(4) | 97(6)  |
| C(102) | 3170(4) | 9953(5)  | 5101(4) | 101(6) |
| C(103) | 3831(5) | 8813(4)  | 5234(4) | 108(6) |
| C(104) | 3861(5) | 8755(4)  | 4713(4) | 89(6)  |
| C(105) | 3554(4) | 9281(5)  | 4410(4) | 86(5)  |
| C(106) | 3496(4) | 9394(5)  | 5422(4) | 96(6)  |
| C(107) | 4443(6) | 9505(5)  | 6086(3) | 90(6)  |
| C(108) | 4799(6) | 8887(4)  | 5886(3) | 103(6) |
| C(109) | 4502(6) | 8552(4)  | 5473(4) | 100(6) |
| C(110) | 3812(5) | 9750(5)  | 5861(3) | 98(6)  |
| C(111) | 4190(5) | 11017(5) | 5988(3) | 67(5)  |
| C(112) | 4861(6) | 10755(5) | 6226(3) | 64(5)  |
| C(113) | 4984(6) | 10023(5) | 6274(3) | 76(5)  |
| C(114) | 3681(5) | 10529(5) | 5811(4) | 86(5)  |

|       |         |          |         |       |
|-------|---------|----------|---------|-------|
| O(10) | 5136(6) | 3929(6)  | 5145(4) | 44(3) |
| C(51) | 4163(9) | 3921(12) | 5620(6) | 41(5) |
| C(52) | 4436(7) | 4185(10) | 5168(6) | 42(5) |
| C(53) | 5394(8) | 4089(11) | 4691(5) | 56(6) |
| C(54) | 6177(8) | 3944(13) | 4733(8) | 62(7) |
| Cl(4) | 8236(3) | 8510(3)  | 5396(1) | 71(1) |
| Cl(5) | 8576(2) | 9971(2)  | 5739(2) | 64(1) |
| Cl(6) | 9184(2) | 8736(2)  | 6268(1) | 65(1) |
| C(50) | 8415(7) | 9061(7)  | 5907(5) | 50(3) |

---

Table 3. Bond lengths [Å] and angles [°] for 19949ds\_sq.

---

|             |           |
|-------------|-----------|
| I(1)-C(13)  | 2.094(7)  |
| I(1)-N(1)   | 2.110(6)  |
| I(1)-O(4)   | 2.352(5)  |
| I(2)-C(29)  | 2.097(7)  |
| I(2)-N(2)   | 2.116(6)  |
| I(2)-O(7)   | 2.335(6)  |
| I(3)-C(45)  | 2.099(7)  |
| I(3)-N(3)   | 2.120(6)  |
| I(3)-O(1)   | 2.348(6)  |
| Cl(1)-C(49) | 1.762(12) |
| Cl(2)-C(49) | 1.748(11) |
| Cl(3)-C(49) | 1.776(12) |
| O(1)-C(1)   | 1.279(9)  |
| O(2)-C(1)   | 1.242(10) |
| O(3)-C(3)   | 1.227(10) |
| O(4)-C(17)  | 1.289(9)  |
| O(5)-C(17)  | 1.244(10) |
| O(6)-C(19)  | 1.227(9)  |
| O(7)-C(33)  | 1.271(9)  |
| O(8)-C(33)  | 1.254(10) |
| O(9)-C(35)  | 1.248(10) |
| N(1)-C(3)   | 1.356(10) |
| N(1)-C(2)   | 1.461(9)  |
| N(2)-C(19)  | 1.368(9)  |
| N(2)-C(18)  | 1.464(9)  |
| N(3)-C(35)  | 1.358(10) |
| N(3)-C(34)  | 1.475(10) |
| C(1)-C(2)   | 1.515(10) |
| C(2)-C(14)  | 1.555(11) |
| C(2)-H(2)   | 1.0000    |
| C(3)-C(4)   | 1.506(11) |
| C(4)-C(5)   | 1.368(10) |
| C(4)-C(13)  | 1.402(10) |
| C(5)-C(6)   | 1.413(10) |

|              |           |
|--------------|-----------|
| C(5)-H(5)    | 0.9500    |
| C(6)-C(11)   | 1.422(10) |
| C(6)-C(7)    | 1.423(10) |
| C(7)-C(8)    | 1.374(12) |
| C(7)-H(7)    | 0.9500    |
| C(8)-C(9)    | 1.417(12) |
| C(8)-H(8)    | 0.9500    |
| C(9)-C(10)   | 1.386(11) |
| C(9)-H(9)    | 0.9500    |
| C(10)-C(11)  | 1.414(11) |
| C(10)-H(10)  | 0.9500    |
| C(11)-C(12)  | 1.424(10) |
| C(12)-C(13)  | 1.377(10) |
| C(12)-H(12)  | 0.9500    |
| C(14)-C(16)  | 1.515(16) |
| C(14)-C(15)  | 1.531(13) |
| C(14)-H(14)  | 1.0000    |
| C(15)-H(15A) | 0.9800    |
| C(15)-H(15B) | 0.9800    |
| C(15)-H(15C) | 0.9800    |
| C(16)-H(16A) | 0.9800    |
| C(16)-H(16B) | 0.9800    |
| C(16)-H(16C) | 0.9800    |
| C(17)-C(18)  | 1.529(10) |
| C(18)-C(30)  | 1.551(12) |
| C(18)-H(18)  | 1.0000    |
| C(19)-C(20)  | 1.500(10) |
| C(20)-C(21)  | 1.385(10) |
| C(20)-C(29)  | 1.413(10) |
| C(21)-C(22)  | 1.416(10) |
| C(21)-H(21)  | 0.9500    |
| C(22)-C(27)  | 1.422(10) |
| C(22)-C(23)  | 1.426(10) |
| C(23)-C(24)  | 1.355(11) |
| C(23)-H(23)  | 0.9500    |
| C(24)-C(25)  | 1.415(12) |

|              |           |
|--------------|-----------|
| C(24)-H(24)  | 0.9500    |
| C(25)-C(26)  | 1.379(12) |
| C(25)-H(25)  | 0.9500    |
| C(26)-C(27)  | 1.422(11) |
| C(26)-H(26)  | 0.9500    |
| C(27)-C(28)  | 1.417(11) |
| C(28)-C(29)  | 1.370(10) |
| C(28)-H(28)  | 0.9500    |
| C(30)-C(32)  | 1.500(16) |
| C(30)-C(31)  | 1.541(12) |
| C(30)-H(30)  | 1.0000    |
| C(31)-H(31A) | 0.9800    |
| C(31)-H(31B) | 0.9800    |
| C(31)-H(31C) | 0.9800    |
| C(32)-H(32A) | 0.9800    |
| C(32)-H(32B) | 0.9800    |
| C(32)-H(32C) | 0.9800    |
| C(33)-C(34)  | 1.523(10) |
| C(34)-C(46)  | 1.544(11) |
| C(34)-H(34)  | 1.0000    |
| C(35)-C(36)  | 1.477(10) |
| C(36)-C(37)  | 1.375(10) |
| C(36)-C(45)  | 1.422(10) |
| C(37)-C(38)  | 1.415(10) |
| C(37)-H(37)  | 0.9500    |
| C(38)-C(39)  | 1.424(10) |
| C(38)-C(43)  | 1.436(11) |
| C(39)-C(40)  | 1.370(12) |
| C(39)-H(39)  | 0.9500    |
| C(40)-C(41)  | 1.415(12) |
| C(40)-H(40)  | 0.9500    |
| C(41)-C(42)  | 1.386(11) |
| C(41)-H(41)  | 0.9500    |
| C(42)-C(43)  | 1.404(11) |
| C(42)-H(42)  | 0.9500    |
| C(43)-C(44)  | 1.430(10) |

|               |           |
|---------------|-----------|
| C(44)-C(45)   | 1.378(10) |
| C(44)-H(44)   | 0.9500    |
| C(46)-C(47)   | 1.504(17) |
| C(46)-C(48)   | 1.532(14) |
| C(46)-H(46)   | 1.0000    |
| C(47)-H(47A)  | 0.9800    |
| C(47)-H(47B)  | 0.9800    |
| C(47)-H(47C)  | 0.9800    |
| C(48)-H(48A)  | 0.9800    |
| C(48)-H(48B)  | 0.9800    |
| C(48)-H(48C)  | 0.9800    |
| C(49)-H(49)   | 1.0000    |
| C(115)-C(117) | 1.3671    |
| C(115)-C(126) | 1.4532    |
| C(115)-C(116) | 1.4533    |
| C(116)-C(118) | 1.3672    |
| C(116)-C(120) | 1.4533    |
| C(117)-C(125) | 1.4533    |
| C(117)-C(149) | 1.4533    |
| C(118)-C(147) | 1.4533    |
| C(118)-C(119) | 1.4533    |
| C(119)-C(122) | 1.3671    |
| C(119)-C(152) | 1.4533    |
| C(120)-C(121) | 1.3670    |
| C(120)-C(127) | 1.4533    |
| C(121)-C(122) | 1.4532    |
| C(121)-C(168) | 1.4534    |
| C(122)-C(173) | 1.4534    |
| C(123)-C(125) | 1.3671    |
| C(123)-C(124) | 1.4533    |
| C(123)-C(134) | 1.4534    |
| C(124)-C(126) | 1.3671    |
| C(124)-C(128) | 1.4532    |
| C(125)-C(133) | 1.4533    |
| C(126)-C(127) | 1.4533    |
| C(127)-C(130) | 1.3670    |

|               |        |
|---------------|--------|
| C(128)-C(129) | 1.3671 |
| C(128)-C(135) | 1.4532 |
| C(129)-C(130) | 1.4532 |
| C(129)-C(164) | 1.4533 |
| C(130)-C(169) | 1.4533 |
| C(131)-C(133) | 1.3671 |
| C(131)-C(132) | 1.4533 |
| C(131)-C(142) | 1.4533 |
| C(132)-C(134) | 1.3672 |
| C(132)-C(136) | 1.4533 |
| C(133)-C(141) | 1.4533 |
| C(134)-C(135) | 1.4533 |
| C(135)-C(138) | 1.3671 |
| C(136)-C(137) | 1.3670 |
| C(136)-C(143) | 1.4533 |
| C(137)-C(160) | 1.4533 |
| C(137)-C(138) | 1.4534 |
| C(138)-C(165) | 1.4533 |
| C(139)-C(141) | 1.3671 |
| C(139)-C(150) | 1.4533 |
| C(139)-C(140) | 1.4534 |
| C(140)-C(142) | 1.3670 |
| C(140)-C(144) | 1.4533 |
| C(141)-C(149) | 1.4534 |
| C(142)-C(143) | 1.4533 |
| C(143)-C(146) | 1.3671 |
| C(144)-C(145) | 1.3671 |
| C(144)-C(151) | 1.4533 |
| C(145)-C(146) | 1.4532 |
| C(145)-C(156) | 1.4533 |
| C(146)-C(161) | 1.4533 |
| C(147)-C(149) | 1.3671 |
| C(147)-C(148) | 1.4533 |
| C(148)-C(150) | 1.3671 |
| C(148)-C(152) | 1.4533 |
| C(150)-C(151) | 1.4532 |



|               |        |
|---------------|--------|
| C(151)-C(154) | 1.3671 |
| C(152)-C(153) | 1.3671 |
| C(153)-C(154) | 1.4532 |
| C(153)-C(172) | 1.4533 |
| C(154)-C(157) | 1.4534 |
| C(155)-C(158) | 1.3671 |
| C(155)-C(161) | 1.4532 |
| C(155)-C(156) | 1.4533 |
| C(156)-C(157) | 1.3671 |
| C(157)-C(171) | 1.4533 |
| C(158)-C(174) | 1.4534 |
| C(158)-C(162) | 1.4534 |
| C(159)-C(162) | 1.3670 |
| C(159)-C(165) | 1.4533 |
| C(159)-C(160) | 1.4534 |
| C(160)-C(161) | 1.3672 |
| C(162)-C(166) | 1.4533 |
| C(163)-C(166) | 1.3671 |
| C(163)-C(169) | 1.4532 |
| C(163)-C(164) | 1.4533 |
| C(164)-C(165) | 1.3671 |
| C(166)-C(170) | 1.4534 |
| C(167)-C(170) | 1.3670 |
| C(167)-C(173) | 1.4533 |
| C(167)-C(168) | 1.4534 |
| C(168)-C(169) | 1.3670 |
| C(170)-C(174) | 1.4533 |
| C(171)-C(174) | 1.3670 |
| C(171)-C(172) | 1.4533 |
| C(172)-C(173) | 1.3671 |
| C(215)-C(217) | 1.3671 |
| C(215)-C(226) | 1.4533 |
| C(215)-C(216) | 1.4533 |
| C(216)-C(218) | 1.3671 |
| C(216)-C(220) | 1.4534 |
| C(217)-C(249) | 1.4533 |

|               |        |
|---------------|--------|
| C(217)-C(225) | 1.4534 |
| C(218)-C(247) | 1.4533 |
| C(218)-C(219) | 1.4534 |
| C(219)-C(222) | 1.3670 |
| C(219)-C(252) | 1.4532 |
| C(220)-C(221) | 1.3671 |
| C(220)-C(227) | 1.4532 |
| C(221)-C(268) | 1.4533 |
| C(221)-C(222) | 1.4534 |
| C(222)-C(273) | 1.4533 |
| C(223)-C(225) | 1.3670 |
| C(223)-C(234) | 1.4532 |
| C(223)-C(224) | 1.4533 |
| C(224)-C(226) | 1.3670 |
| C(224)-C(228) | 1.4534 |
| C(225)-C(233) | 1.4533 |
| C(226)-C(227) | 1.4534 |
| C(227)-C(230) | 1.3670 |
| C(228)-C(229) | 1.3671 |
| C(228)-C(235) | 1.4533 |
| C(229)-C(230) | 1.4533 |
| C(229)-C(264) | 1.4533 |
| C(230)-C(269) | 1.4533 |
| C(231)-C(233) | 1.3671 |
| C(231)-C(232) | 1.4532 |
| C(231)-C(242) | 1.4533 |
| C(232)-C(234) | 1.3671 |
| C(232)-C(236) | 1.4534 |
| C(233)-C(241) | 1.4533 |
| C(234)-C(235) | 1.4534 |
| C(235)-C(238) | 1.3670 |
| C(236)-C(237) | 1.3671 |
| C(236)-C(243) | 1.4533 |
| C(237)-C(238) | 1.4532 |
| C(237)-C(260) | 1.4534 |
| C(238)-C(265) | 1.4532 |

|               |        |
|---------------|--------|
| C(239)-C(241) | 1.3670 |
| C(239)-C(250) | 1.4533 |
| C(239)-C(240) | 1.4534 |
| C(240)-C(242) | 1.3671 |
| C(240)-C(244) | 1.4532 |
| C(241)-C(249) | 1.4533 |
| C(242)-C(243) | 1.4533 |
| C(243)-C(246) | 1.3670 |
| C(244)-C(245) | 1.3671 |
| C(244)-C(251) | 1.4533 |
| C(245)-C(256) | 1.4533 |
| C(245)-C(246) | 1.4533 |
| C(246)-C(261) | 1.4533 |
| C(247)-C(249) | 1.3670 |
| C(247)-C(248) | 1.4533 |
| C(248)-C(250) | 1.3669 |
| C(248)-C(252) | 1.4534 |
| C(250)-C(251) | 1.4534 |
| C(251)-C(254) | 1.3671 |
| C(252)-C(253) | 1.3671 |
| C(253)-C(272) | 1.4533 |
| C(253)-C(254) | 1.4533 |
| C(254)-C(257) | 1.4533 |
| C(255)-C(258) | 1.3671 |
| C(255)-C(256) | 1.4533 |
| C(255)-C(261) | 1.4533 |
| C(256)-C(257) | 1.3671 |
| C(257)-C(271) | 1.4533 |
| C(258)-C(274) | 1.4532 |
| C(258)-C(262) | 1.4533 |
| C(259)-C(262) | 1.3670 |
| C(259)-C(265) | 1.4533 |
| C(259)-C(260) | 1.4533 |
| C(260)-C(261) | 1.3670 |
| C(262)-C(266) | 1.4533 |
| C(263)-C(266) | 1.3671 |

|               |        |
|---------------|--------|
| C(263)-C(269) | 1.4532 |
| C(263)-C(264) | 1.4533 |
| C(264)-C(265) | 1.3671 |
| C(266)-C(270) | 1.4532 |
| C(267)-C(270) | 1.3670 |
| C(267)-C(268) | 1.4533 |
| C(267)-C(273) | 1.4533 |
| C(268)-C(269) | 1.3671 |
| C(270)-C(274) | 1.4534 |
| C(271)-C(274) | 1.3671 |
| C(271)-C(272) | 1.4533 |
| C(272)-C(273) | 1.3670 |
| C(55)-C(57)   | 1.3671 |
| C(55)-C(56)   | 1.4533 |
| C(55)-C(66)   | 1.4534 |
| C(56)-C(58)   | 1.3671 |
| C(56)-C(60)   | 1.4533 |
| C(57)-C(89)   | 1.4532 |
| C(57)-C(65)   | 1.4533 |
| C(58)-C(87)   | 1.4532 |
| C(58)-C(59)   | 1.4533 |
| C(59)-C(62)   | 1.3672 |
| C(59)-C(92)   | 1.4533 |
| C(60)-C(61)   | 1.3671 |
| C(60)-C(67)   | 1.4533 |
| C(61)-C(108)  | 1.4532 |
| C(61)-C(62)   | 1.4533 |
| C(62)-C(113)  | 1.4532 |
| C(63)-C(65)   | 1.3670 |
| C(63)-C(74)   | 1.4534 |
| C(63)-C(64)   | 1.4534 |
| C(64)-C(66)   | 1.3671 |
| C(64)-C(68)   | 1.4534 |
| C(65)-C(73)   | 1.4534 |
| C(66)-C(67)   | 1.4532 |
| C(67)-C(70)   | 1.3670 |

|              |        |
|--------------|--------|
| C(68)-C(69)  | 1.3670 |
| C(68)-C(75)  | 1.4533 |
| C(69)-C(70)  | 1.4533 |
| C(69)-C(104) | 1.4533 |
| C(70)-C(109) | 1.4536 |
| C(71)-C(73)  | 1.3671 |
| C(71)-C(72)  | 1.4533 |
| C(71)-C(82)  | 1.4533 |
| C(72)-C(74)  | 1.3669 |
| C(72)-C(76)  | 1.4533 |
| C(73)-C(81)  | 1.4534 |
| C(74)-C(75)  | 1.4533 |
| C(75)-C(78)  | 1.3671 |
| C(76)-C(77)  | 1.3671 |
| C(76)-C(83)  | 1.4533 |
| C(77)-C(78)  | 1.4532 |
| C(77)-C(100) | 1.4532 |
| C(78)-C(105) | 1.4533 |
| C(79)-C(81)  | 1.3672 |
| C(79)-C(80)  | 1.4531 |
| C(79)-C(90)  | 1.4533 |
| C(80)-C(82)  | 1.3672 |
| C(80)-C(84)  | 1.4533 |
| C(81)-C(89)  | 1.4535 |
| C(82)-C(83)  | 1.4534 |
| C(83)-C(86)  | 1.3670 |
| C(84)-C(85)  | 1.3670 |
| C(84)-C(91)  | 1.4533 |
| C(85)-C(86)  | 1.4533 |
| C(85)-C(96)  | 1.4533 |
| C(86)-C(101) | 1.4535 |
| C(87)-C(89)  | 1.3670 |
| C(87)-C(88)  | 1.4535 |
| C(88)-C(90)  | 1.3670 |
| C(88)-C(92)  | 1.4534 |
| C(90)-C(91)  | 1.4532 |

|               |        |
|---------------|--------|
| C(91)-C(94)   | 1.3671 |
| C(92)-C(93)   | 1.3671 |
| C(93)-C(94)   | 1.4533 |
| C(93)-C(112)  | 1.4534 |
| C(94)-C(97)   | 1.4532 |
| C(95)-C(98)   | 1.3671 |
| C(95)-C(96)   | 1.4533 |
| C(95)-C(101)  | 1.4535 |
| C(96)-C(97)   | 1.3671 |
| C(97)-C(111)  | 1.4534 |
| C(98)-C(114)  | 1.4532 |
| C(98)-C(102)  | 1.4533 |
| C(99)-C(102)  | 1.3670 |
| C(99)-C(100)  | 1.4533 |
| C(99)-C(105)  | 1.4534 |
| C(100)-C(101) | 1.3671 |
| C(102)-C(106) | 1.4534 |
| C(103)-C(106) | 1.3670 |
| C(103)-C(109) | 1.4532 |
| C(103)-C(104) | 1.4532 |
| C(104)-C(105) | 1.3670 |
| C(106)-C(110) | 1.4534 |
| C(107)-C(110) | 1.3670 |
| C(107)-C(108) | 1.4533 |
| C(107)-C(113) | 1.4534 |
| C(108)-C(109) | 1.3671 |
| C(110)-C(114) | 1.4534 |
| C(111)-C(114) | 1.3671 |
| C(111)-C(112) | 1.4533 |
| C(112)-C(113) | 1.3670 |
| O(10)-C(52)   | 1.4117 |
| O(10)-C(53)   | 1.4204 |
| C(51)-C(52)   | 1.4806 |
| C(51)-H(51A)  | 0.9800 |
| C(51)-H(51B)  | 0.9800 |
| C(51)-H(51C)  | 0.9800 |

|              |           |
|--------------|-----------|
| C(52)-H(52)  | 0.9500    |
| C(53)-C(54)  | 1.4977    |
| C(53)-H(53A) | 0.9900    |
| C(53)-H(53B) | 0.9900    |
| C(54)-H(54A) | 0.9800    |
| C(54)-H(54B) | 0.9800    |
| C(54)-H(54C) | 0.9800    |
| Cl(4)-C(50)  | 1.744(15) |
| Cl(5)-C(50)  | 1.765(13) |
| Cl(6)-C(50)  | 1.782(14) |
| C(50)-H(50)  | 1.0000    |

|                  |          |
|------------------|----------|
| C(13)-I(1)-N(1)  | 79.3(3)  |
| C(13)-I(1)-O(4)  | 83.6(2)  |
| N(1)-I(1)-O(4)   | 162.9(2) |
| C(29)-I(2)-N(2)  | 79.9(3)  |
| C(29)-I(2)-O(7)  | 83.7(2)  |
| N(2)-I(2)-O(7)   | 163.6(2) |
| C(45)-I(3)-N(3)  | 79.6(3)  |
| C(45)-I(3)-O(1)  | 83.6(2)  |
| N(3)-I(3)-O(1)   | 163.2(2) |
| C(1)-O(1)-I(3)   | 104.4(5) |
| C(17)-O(4)-I(1)  | 104.5(5) |
| C(33)-O(7)-I(2)  | 105.6(5) |
| C(3)-N(1)-C(2)   | 119.0(6) |
| C(3)-N(1)-I(1)   | 116.7(5) |
| C(2)-N(1)-I(1)   | 123.8(5) |
| C(19)-N(2)-C(18) | 118.7(6) |
| C(19)-N(2)-I(2)  | 116.3(5) |
| C(18)-N(2)-I(2)  | 124.5(5) |
| C(35)-N(3)-C(34) | 119.7(6) |
| C(35)-N(3)-I(3)  | 115.9(5) |
| C(34)-N(3)-I(3)  | 123.9(5) |
| O(2)-C(1)-O(1)   | 122.8(7) |
| O(2)-C(1)-C(2)   | 119.6(7) |
| O(1)-C(1)-C(2)   | 117.5(7) |

|                   |          |
|-------------------|----------|
| N(1)-C(2)-C(1)    | 111.2(6) |
| N(1)-C(2)-C(14)   | 111.2(6) |
| C(1)-C(2)-C(14)   | 110.0(6) |
| N(1)-C(2)-H(2)    | 108.1    |
| C(1)-C(2)-H(2)    | 108.1    |
| C(14)-C(2)-H(2)   | 108.1    |
| O(3)-C(3)-N(1)    | 124.8(7) |
| O(3)-C(3)-C(4)    | 122.8(7) |
| N(1)-C(3)-C(4)    | 112.3(6) |
| C(5)-C(4)-C(13)   | 119.9(7) |
| C(5)-C(4)-C(3)    | 122.1(7) |
| C(13)-C(4)-C(3)   | 118.0(6) |
| C(4)-C(5)-C(6)    | 120.5(7) |
| C(4)-C(5)-H(5)    | 119.7    |
| C(6)-C(5)-H(5)    | 119.7    |
| C(5)-C(6)-C(11)   | 119.1(7) |
| C(5)-C(6)-C(7)    | 122.1(7) |
| C(11)-C(6)-C(7)   | 118.8(7) |
| C(8)-C(7)-C(6)    | 120.7(7) |
| C(8)-C(7)-H(7)    | 119.7    |
| C(6)-C(7)-H(7)    | 119.7    |
| C(7)-C(8)-C(9)    | 120.0(7) |
| C(7)-C(8)-H(8)    | 120.0    |
| C(9)-C(8)-H(8)    | 120.0    |
| C(10)-C(9)-C(8)   | 120.9(8) |
| C(10)-C(9)-H(9)   | 119.5    |
| C(8)-C(9)-H(9)    | 119.5    |
| C(9)-C(10)-C(11)  | 119.5(7) |
| C(9)-C(10)-H(10)  | 120.2    |
| C(11)-C(10)-H(10) | 120.2    |
| C(10)-C(11)-C(6)  | 120.1(7) |
| C(10)-C(11)-C(12) | 119.9(7) |
| C(6)-C(11)-C(12)  | 120.0(7) |
| C(13)-C(12)-C(11) | 118.1(7) |
| C(13)-C(12)-H(12) | 121.0    |
| C(11)-C(12)-H(12) | 121.0    |



|                     |          |
|---------------------|----------|
| C(12)-C(13)-C(4)    | 122.4(7) |
| C(12)-C(13)-I(1)    | 125.0(5) |
| C(4)-C(13)-I(1)     | 112.6(5) |
| C(16)-C(14)-C(15)   | 110.9(8) |
| C(16)-C(14)-C(2)    | 111.5(8) |
| C(15)-C(14)-C(2)    | 112.1(8) |
| C(16)-C(14)-H(14)   | 107.3    |
| C(15)-C(14)-H(14)   | 107.3    |
| C(2)-C(14)-H(14)    | 107.3    |
| C(14)-C(15)-H(15A)  | 109.5    |
| C(14)-C(15)-H(15B)  | 109.5    |
| H(15A)-C(15)-H(15B) | 109.5    |
| C(14)-C(15)-H(15C)  | 109.5    |
| H(15A)-C(15)-H(15C) | 109.5    |
| H(15B)-C(15)-H(15C) | 109.5    |
| C(14)-C(16)-H(16A)  | 109.5    |
| C(14)-C(16)-H(16B)  | 109.5    |
| H(16A)-C(16)-H(16B) | 109.5    |
| C(14)-C(16)-H(16C)  | 109.5    |
| H(16A)-C(16)-H(16C) | 109.5    |
| H(16B)-C(16)-H(16C) | 109.5    |
| O(5)-C(17)-O(4)     | 122.8(7) |
| O(5)-C(17)-C(18)    | 120.9(7) |
| O(4)-C(17)-C(18)    | 116.3(6) |
| N(2)-C(18)-C(17)    | 110.1(6) |
| N(2)-C(18)-C(30)    | 110.7(6) |
| C(17)-C(18)-C(30)   | 109.9(6) |
| N(2)-C(18)-H(18)    | 108.7    |
| C(17)-C(18)-H(18)   | 108.7    |
| C(30)-C(18)-H(18)   | 108.7    |
| O(6)-C(19)-N(2)     | 124.7(7) |
| O(6)-C(19)-C(20)    | 122.8(7) |
| N(2)-C(19)-C(20)    | 112.5(6) |
| C(21)-C(20)-C(29)   | 120.0(7) |
| C(21)-C(20)-C(19)   | 121.3(7) |
| C(29)-C(20)-C(19)   | 118.7(6) |

|                     |          |
|---------------------|----------|
| C(20)-C(21)-C(22)   | 119.5(7) |
| C(20)-C(21)-H(21)   | 120.2    |
| C(22)-C(21)-H(21)   | 120.2    |
| C(21)-C(22)-C(27)   | 119.3(7) |
| C(21)-C(22)-C(23)   | 120.9(7) |
| C(27)-C(22)-C(23)   | 119.8(7) |
| C(24)-C(23)-C(22)   | 120.1(7) |
| C(24)-C(23)-H(23)   | 120.0    |
| C(22)-C(23)-H(23)   | 120.0    |
| C(23)-C(24)-C(25)   | 120.6(7) |
| C(23)-C(24)-H(24)   | 119.7    |
| C(25)-C(24)-H(24)   | 119.7    |
| C(26)-C(25)-C(24)   | 121.1(7) |
| C(26)-C(25)-H(25)   | 119.4    |
| C(24)-C(25)-H(25)   | 119.4    |
| C(25)-C(26)-C(27)   | 119.5(7) |
| C(25)-C(26)-H(26)   | 120.2    |
| C(27)-C(26)-H(26)   | 120.2    |
| C(28)-C(27)-C(22)   | 120.8(7) |
| C(28)-C(27)-C(26)   | 120.3(7) |
| C(22)-C(27)-C(26)   | 118.9(7) |
| C(29)-C(28)-C(27)   | 118.1(7) |
| C(29)-C(28)-H(28)   | 121.0    |
| C(27)-C(28)-H(28)   | 121.0    |
| C(28)-C(29)-C(20)   | 122.3(7) |
| C(28)-C(29)-I(2)    | 125.7(5) |
| C(20)-C(29)-I(2)    | 112.0(5) |
| C(32)-C(30)-C(31)   | 110.1(8) |
| C(32)-C(30)-C(18)   | 112.8(8) |
| C(31)-C(30)-C(18)   | 112.4(8) |
| C(32)-C(30)-H(30)   | 107.1    |
| C(31)-C(30)-H(30)   | 107.1    |
| C(18)-C(30)-H(30)   | 107.1    |
| C(30)-C(31)-H(31A)  | 109.5    |
| C(30)-C(31)-H(31B)  | 109.5    |
| H(31A)-C(31)-H(31B) | 109.5    |

|                     |          |
|---------------------|----------|
| C(30)-C(31)-H(31C)  | 109.5    |
| H(31A)-C(31)-H(31C) | 109.5    |
| H(31B)-C(31)-H(31C) | 109.5    |
| C(30)-C(32)-H(32A)  | 109.5    |
| C(30)-C(32)-H(32B)  | 109.5    |
| H(32A)-C(32)-H(32B) | 109.5    |
| C(30)-C(32)-H(32C)  | 109.5    |
| H(32A)-C(32)-H(32C) | 109.5    |
| H(32B)-C(32)-H(32C) | 109.5    |
| O(8)-C(33)-O(7)     | 123.4(7) |
| O(8)-C(33)-C(34)    | 120.1(7) |
| O(7)-C(33)-C(34)    | 116.5(7) |
| N(3)-C(34)-C(33)    | 110.7(6) |
| N(3)-C(34)-C(46)    | 110.9(6) |
| C(33)-C(34)-C(46)   | 111.5(7) |
| N(3)-C(34)-H(34)    | 107.9    |
| C(33)-C(34)-H(34)   | 107.9    |
| C(46)-C(34)-H(34)   | 107.9    |
| O(9)-C(35)-N(3)     | 122.5(7) |
| O(9)-C(35)-C(36)    | 123.9(7) |
| N(3)-C(35)-C(36)    | 113.5(6) |
| C(37)-C(36)-C(45)   | 119.7(7) |
| C(37)-C(36)-C(35)   | 121.9(7) |
| C(45)-C(36)-C(35)   | 118.4(6) |
| C(36)-C(37)-C(38)   | 120.1(7) |
| C(36)-C(37)-H(37)   | 119.9    |
| C(38)-C(37)-H(37)   | 119.9    |
| C(37)-C(38)-C(39)   | 121.4(7) |
| C(37)-C(38)-C(43)   | 119.8(7) |
| C(39)-C(38)-C(43)   | 118.9(7) |
| C(40)-C(39)-C(38)   | 120.4(7) |
| C(40)-C(39)-H(39)   | 119.8    |
| C(38)-C(39)-H(39)   | 119.8    |
| C(39)-C(40)-C(41)   | 120.5(7) |
| C(39)-C(40)-H(40)   | 119.8    |
| C(41)-C(40)-H(40)   | 119.8    |

|                     |          |
|---------------------|----------|
| C(42)-C(41)-C(40)   | 120.5(8) |
| C(42)-C(41)-H(41)   | 119.7    |
| C(40)-C(41)-H(41)   | 119.7    |
| C(41)-C(42)-C(43)   | 120.2(8) |
| C(41)-C(42)-H(42)   | 119.9    |
| C(43)-C(42)-H(42)   | 119.9    |
| C(42)-C(43)-C(44)   | 120.9(7) |
| C(42)-C(43)-C(38)   | 119.5(7) |
| C(44)-C(43)-C(38)   | 119.6(7) |
| C(45)-C(44)-C(43)   | 118.1(7) |
| C(45)-C(44)-H(44)   | 120.9    |
| C(43)-C(44)-H(44)   | 120.9    |
| C(44)-C(45)-C(36)   | 122.5(6) |
| C(44)-C(45)-I(3)    | 125.6(5) |
| C(36)-C(45)-I(3)    | 111.8(5) |
| C(47)-C(46)-C(48)   | 110.7(9) |
| C(47)-C(46)-C(34)   | 111.7(8) |
| C(48)-C(46)-C(34)   | 112.4(8) |
| C(47)-C(46)-H(46)   | 107.2    |
| C(48)-C(46)-H(46)   | 107.2    |
| C(34)-C(46)-H(46)   | 107.2    |
| C(46)-C(47)-H(47A)  | 109.5    |
| C(46)-C(47)-H(47B)  | 109.5    |
| H(47A)-C(47)-H(47B) | 109.5    |
| C(46)-C(47)-H(47C)  | 109.5    |
| H(47A)-C(47)-H(47C) | 109.5    |
| H(47B)-C(47)-H(47C) | 109.5    |
| C(46)-C(48)-H(48A)  | 109.5    |
| C(46)-C(48)-H(48B)  | 109.5    |
| H(48A)-C(48)-H(48B) | 109.5    |
| C(46)-C(48)-H(48C)  | 109.5    |
| H(48A)-C(48)-H(48C) | 109.5    |
| H(48B)-C(48)-H(48C) | 109.5    |
| Cl(2)-C(49)-Cl(1)   | 111.3(6) |
| Cl(2)-C(49)-Cl(3)   | 110.0(6) |
| Cl(1)-C(49)-Cl(3)   | 110.1(6) |

|                      |       |
|----------------------|-------|
| CI(2)-C(49)-H(49)    | 108.4 |
| CI(1)-C(49)-H(49)    | 108.4 |
| CI(3)-C(49)-H(49)    | 108.4 |
| C(117)-C(115)-C(126) | 120.0 |
| C(117)-C(115)-C(116) | 120.0 |
| C(126)-C(115)-C(116) | 108.0 |
| C(118)-C(116)-C(115) | 120.0 |
| C(118)-C(116)-C(120) | 120.0 |
| C(115)-C(116)-C(120) | 108.0 |
| C(115)-C(117)-C(125) | 120.0 |
| C(115)-C(117)-C(149) | 120.0 |
| C(125)-C(117)-C(149) | 108.0 |
| C(116)-C(118)-C(147) | 120.0 |
| C(116)-C(118)-C(119) | 120.0 |
| C(147)-C(118)-C(119) | 108.0 |
| C(122)-C(119)-C(152) | 120.0 |
| C(122)-C(119)-C(118) | 120.0 |
| C(152)-C(119)-C(118) | 108.0 |
| C(121)-C(120)-C(127) | 120.0 |
| C(121)-C(120)-C(116) | 120.0 |
| C(127)-C(120)-C(116) | 108.0 |
| C(120)-C(121)-C(122) | 120.0 |
| C(120)-C(121)-C(168) | 120.0 |
| C(122)-C(121)-C(168) | 108.0 |
| C(119)-C(122)-C(121) | 120.0 |
| C(119)-C(122)-C(173) | 120.0 |
| C(121)-C(122)-C(173) | 108.0 |
| C(125)-C(123)-C(124) | 120.0 |
| C(125)-C(123)-C(134) | 120.0 |
| C(124)-C(123)-C(134) | 108.0 |
| C(126)-C(124)-C(128) | 120.0 |
| C(126)-C(124)-C(123) | 120.0 |
| C(128)-C(124)-C(123) | 108.0 |
| C(123)-C(125)-C(117) | 120.0 |
| C(123)-C(125)-C(133) | 120.0 |
| C(117)-C(125)-C(133) | 108.0 |

|                      |       |
|----------------------|-------|
| C(124)-C(126)-C(115) | 120.0 |
| C(124)-C(126)-C(127) | 120.0 |
| C(115)-C(126)-C(127) | 108.0 |
| C(130)-C(127)-C(120) | 120.0 |
| C(130)-C(127)-C(126) | 120.0 |
| C(120)-C(127)-C(126) | 108.0 |
| C(129)-C(128)-C(135) | 120.0 |
| C(129)-C(128)-C(124) | 120.0 |
| C(135)-C(128)-C(124) | 108.0 |
| C(128)-C(129)-C(130) | 120.0 |
| C(128)-C(129)-C(164) | 120.0 |
| C(130)-C(129)-C(164) | 108.0 |
| C(127)-C(130)-C(129) | 120.0 |
| C(127)-C(130)-C(169) | 120.0 |
| C(129)-C(130)-C(169) | 108.0 |
| C(133)-C(131)-C(132) | 120.0 |
| C(133)-C(131)-C(142) | 120.0 |
| C(132)-C(131)-C(142) | 108.0 |
| C(134)-C(132)-C(136) | 120.0 |
| C(134)-C(132)-C(131) | 120.0 |
| C(136)-C(132)-C(131) | 108.0 |
| C(131)-C(133)-C(125) | 120.0 |
| C(131)-C(133)-C(141) | 120.0 |
| C(125)-C(133)-C(141) | 108.0 |
| C(132)-C(134)-C(135) | 120.0 |
| C(132)-C(134)-C(123) | 120.0 |
| C(135)-C(134)-C(123) | 108.0 |
| C(138)-C(135)-C(128) | 120.0 |
| C(138)-C(135)-C(134) | 120.0 |
| C(128)-C(135)-C(134) | 108.0 |
| C(137)-C(136)-C(132) | 120.0 |
| C(137)-C(136)-C(143) | 120.0 |
| C(132)-C(136)-C(143) | 108.0 |
| C(136)-C(137)-C(160) | 120.0 |
| C(136)-C(137)-C(138) | 120.0 |
| C(160)-C(137)-C(138) | 108.0 |

|                      |       |
|----------------------|-------|
| C(135)-C(138)-C(165) | 120.0 |
| C(135)-C(138)-C(137) | 120.0 |
| C(165)-C(138)-C(137) | 108.0 |
| C(141)-C(139)-C(150) | 120.0 |
| C(141)-C(139)-C(140) | 120.0 |
| C(150)-C(139)-C(140) | 108.0 |
| C(142)-C(140)-C(144) | 120.0 |
| C(142)-C(140)-C(139) | 120.0 |
| C(144)-C(140)-C(139) | 108.0 |
| C(139)-C(141)-C(133) | 120.0 |
| C(139)-C(141)-C(149) | 120.0 |
| C(133)-C(141)-C(149) | 108.0 |
| C(140)-C(142)-C(143) | 120.0 |
| C(140)-C(142)-C(131) | 120.0 |
| C(143)-C(142)-C(131) | 108.0 |
| C(146)-C(143)-C(136) | 120.0 |
| C(146)-C(143)-C(142) | 120.0 |
| C(136)-C(143)-C(142) | 108.0 |
| C(145)-C(144)-C(151) | 120.0 |
| C(145)-C(144)-C(140) | 120.0 |
| C(151)-C(144)-C(140) | 108.0 |
| C(144)-C(145)-C(146) | 120.0 |
| C(144)-C(145)-C(156) | 120.0 |
| C(146)-C(145)-C(156) | 108.0 |
| C(143)-C(146)-C(145) | 120.0 |
| C(143)-C(146)-C(161) | 120.0 |
| C(145)-C(146)-C(161) | 108.0 |
| C(149)-C(147)-C(118) | 120.0 |
| C(149)-C(147)-C(148) | 120.0 |
| C(118)-C(147)-C(148) | 108.0 |
| C(150)-C(148)-C(152) | 120.0 |
| C(150)-C(148)-C(147) | 120.0 |
| C(152)-C(148)-C(147) | 108.0 |
| C(147)-C(149)-C(117) | 120.0 |
| C(147)-C(149)-C(141) | 120.0 |
| C(117)-C(149)-C(141) | 108.0 |

|                      |       |
|----------------------|-------|
| C(148)-C(150)-C(151) | 120.0 |
| C(148)-C(150)-C(139) | 120.0 |
| C(151)-C(150)-C(139) | 108.0 |
| C(154)-C(151)-C(150) | 120.0 |
| C(154)-C(151)-C(144) | 120.0 |
| C(150)-C(151)-C(144) | 108.0 |
| C(153)-C(152)-C(119) | 120.0 |
| C(153)-C(152)-C(148) | 120.0 |
| C(119)-C(152)-C(148) | 108.0 |
| C(152)-C(153)-C(154) | 120.0 |
| C(152)-C(153)-C(172) | 120.0 |
| C(154)-C(153)-C(172) | 108.0 |
| C(151)-C(154)-C(153) | 120.0 |
| C(151)-C(154)-C(157) | 120.0 |
| C(153)-C(154)-C(157) | 108.0 |
| C(158)-C(155)-C(161) | 120.0 |
| C(158)-C(155)-C(156) | 120.0 |
| C(161)-C(155)-C(156) | 108.0 |
| C(157)-C(156)-C(145) | 120.0 |
| C(157)-C(156)-C(155) | 120.0 |
| C(145)-C(156)-C(155) | 108.0 |
| C(156)-C(157)-C(171) | 120.0 |
| C(156)-C(157)-C(154) | 120.0 |
| C(171)-C(157)-C(154) | 108.0 |
| C(155)-C(158)-C(174) | 120.0 |
| C(155)-C(158)-C(162) | 120.0 |
| C(174)-C(158)-C(162) | 108.0 |
| C(162)-C(159)-C(165) | 120.0 |
| C(162)-C(159)-C(160) | 120.0 |
| C(165)-C(159)-C(160) | 108.0 |
| C(161)-C(160)-C(137) | 120.0 |
| C(161)-C(160)-C(159) | 120.0 |
| C(137)-C(160)-C(159) | 108.0 |
| C(160)-C(161)-C(155) | 120.0 |
| C(160)-C(161)-C(146) | 120.0 |
| C(155)-C(161)-C(146) | 108.0 |



|                      |       |
|----------------------|-------|
| C(159)-C(162)-C(166) | 120.0 |
| C(159)-C(162)-C(158) | 120.0 |
| C(166)-C(162)-C(158) | 108.0 |
| C(166)-C(163)-C(169) | 120.0 |
| C(166)-C(163)-C(164) | 120.0 |
| C(169)-C(163)-C(164) | 108.0 |
| C(165)-C(164)-C(129) | 120.0 |
| C(165)-C(164)-C(163) | 120.0 |
| C(129)-C(164)-C(163) | 108.0 |
| C(164)-C(165)-C(138) | 120.0 |
| C(164)-C(165)-C(159) | 120.0 |
| C(138)-C(165)-C(159) | 108.0 |
| C(163)-C(166)-C(162) | 120.0 |
| C(163)-C(166)-C(170) | 120.0 |
| C(162)-C(166)-C(170) | 108.0 |
| C(170)-C(167)-C(173) | 120.0 |
| C(170)-C(167)-C(168) | 120.0 |
| C(173)-C(167)-C(168) | 108.0 |
| C(169)-C(168)-C(121) | 120.0 |
| C(169)-C(168)-C(167) | 120.0 |
| C(121)-C(168)-C(167) | 108.0 |
| C(168)-C(169)-C(163) | 120.0 |
| C(168)-C(169)-C(130) | 120.0 |
| C(163)-C(169)-C(130) | 108.0 |
| C(167)-C(170)-C(174) | 120.0 |
| C(167)-C(170)-C(166) | 120.0 |
| C(174)-C(170)-C(166) | 108.0 |
| C(174)-C(171)-C(172) | 120.0 |
| C(174)-C(171)-C(157) | 120.0 |
| C(172)-C(171)-C(157) | 108.0 |
| C(173)-C(172)-C(171) | 120.0 |
| C(173)-C(172)-C(153) | 120.0 |
| C(171)-C(172)-C(153) | 108.0 |
| C(172)-C(173)-C(167) | 120.0 |
| C(172)-C(173)-C(122) | 120.0 |
| C(167)-C(173)-C(122) | 108.0 |

|                      |       |
|----------------------|-------|
| C(171)-C(174)-C(170) | 120.0 |
| C(171)-C(174)-C(158) | 120.0 |
| C(170)-C(174)-C(158) | 108.0 |
| C(217)-C(215)-C(226) | 120.0 |
| C(217)-C(215)-C(216) | 120.0 |
| C(226)-C(215)-C(216) | 108.0 |
| C(218)-C(216)-C(215) | 120.0 |
| C(218)-C(216)-C(220) | 120.0 |
| C(215)-C(216)-C(220) | 108.0 |
| C(215)-C(217)-C(249) | 120.0 |
| C(215)-C(217)-C(225) | 120.0 |
| C(249)-C(217)-C(225) | 108.0 |
| C(216)-C(218)-C(247) | 120.0 |
| C(216)-C(218)-C(219) | 120.0 |
| C(247)-C(218)-C(219) | 108.0 |
| C(222)-C(219)-C(252) | 120.0 |
| C(222)-C(219)-C(218) | 120.0 |
| C(252)-C(219)-C(218) | 108.0 |
| C(221)-C(220)-C(227) | 120.0 |
| C(221)-C(220)-C(216) | 120.0 |
| C(227)-C(220)-C(216) | 108.0 |
| C(220)-C(221)-C(268) | 120.0 |
| C(220)-C(221)-C(222) | 120.0 |
| C(268)-C(221)-C(222) | 108.0 |
| C(219)-C(222)-C(273) | 120.0 |
| C(219)-C(222)-C(221) | 120.0 |
| C(273)-C(222)-C(221) | 108.0 |
| C(225)-C(223)-C(234) | 120.0 |
| C(225)-C(223)-C(224) | 120.0 |
| C(234)-C(223)-C(224) | 108.0 |
| C(226)-C(224)-C(223) | 120.0 |
| C(226)-C(224)-C(228) | 120.0 |
| C(223)-C(224)-C(228) | 108.0 |
| C(223)-C(225)-C(233) | 120.0 |
| C(223)-C(225)-C(217) | 120.0 |
| C(233)-C(225)-C(217) | 108.0 |

|                      |       |
|----------------------|-------|
| C(224)-C(226)-C(215) | 120.0 |
| C(224)-C(226)-C(227) | 120.0 |
| C(215)-C(226)-C(227) | 108.0 |
| C(230)-C(227)-C(220) | 120.0 |
| C(230)-C(227)-C(226) | 120.0 |
| C(220)-C(227)-C(226) | 108.0 |
| C(229)-C(228)-C(235) | 120.0 |
| C(229)-C(228)-C(224) | 120.0 |
| C(235)-C(228)-C(224) | 108.0 |
| C(228)-C(229)-C(230) | 120.0 |
| C(228)-C(229)-C(264) | 120.0 |
| C(230)-C(229)-C(264) | 108.0 |
| C(227)-C(230)-C(229) | 120.0 |
| C(227)-C(230)-C(269) | 120.0 |
| C(229)-C(230)-C(269) | 108.0 |
| C(233)-C(231)-C(232) | 120.0 |
| C(233)-C(231)-C(242) | 120.0 |
| C(232)-C(231)-C(242) | 108.0 |
| C(234)-C(232)-C(231) | 120.0 |
| C(234)-C(232)-C(236) | 120.0 |
| C(231)-C(232)-C(236) | 108.0 |
| C(231)-C(233)-C(225) | 120.0 |
| C(231)-C(233)-C(241) | 120.0 |
| C(225)-C(233)-C(241) | 108.0 |
| C(232)-C(234)-C(223) | 120.0 |
| C(232)-C(234)-C(235) | 120.0 |
| C(223)-C(234)-C(235) | 108.0 |
| C(238)-C(235)-C(228) | 120.0 |
| C(238)-C(235)-C(234) | 120.0 |
| C(228)-C(235)-C(234) | 108.0 |
| C(237)-C(236)-C(243) | 120.0 |
| C(237)-C(236)-C(232) | 120.0 |
| C(243)-C(236)-C(232) | 108.0 |
| C(236)-C(237)-C(238) | 120.0 |
| C(236)-C(237)-C(260) | 120.0 |
| C(238)-C(237)-C(260) | 108.0 |

|                      |       |
|----------------------|-------|
| C(235)-C(238)-C(237) | 120.0 |
| C(235)-C(238)-C(265) | 120.0 |
| C(237)-C(238)-C(265) | 108.0 |
| C(241)-C(239)-C(250) | 120.0 |
| C(241)-C(239)-C(240) | 120.0 |
| C(250)-C(239)-C(240) | 108.0 |
| C(242)-C(240)-C(244) | 120.0 |
| C(242)-C(240)-C(239) | 120.0 |
| C(244)-C(240)-C(239) | 108.0 |
| C(239)-C(241)-C(249) | 120.0 |
| C(239)-C(241)-C(233) | 120.0 |
| C(249)-C(241)-C(233) | 108.0 |
| C(240)-C(242)-C(243) | 120.0 |
| C(240)-C(242)-C(231) | 120.0 |
| C(243)-C(242)-C(231) | 108.0 |
| C(246)-C(243)-C(242) | 120.0 |
| C(246)-C(243)-C(236) | 120.0 |
| C(242)-C(243)-C(236) | 108.0 |
| C(245)-C(244)-C(240) | 120.0 |
| C(245)-C(244)-C(251) | 120.0 |
| C(240)-C(244)-C(251) | 108.0 |
| C(244)-C(245)-C(256) | 120.0 |
| C(244)-C(245)-C(246) | 120.0 |
| C(256)-C(245)-C(246) | 108.0 |
| C(243)-C(246)-C(261) | 120.0 |
| C(243)-C(246)-C(245) | 120.0 |
| C(261)-C(246)-C(245) | 108.0 |
| C(249)-C(247)-C(218) | 120.0 |
| C(249)-C(247)-C(248) | 120.0 |
| C(218)-C(247)-C(248) | 108.0 |
| C(250)-C(248)-C(247) | 120.0 |
| C(250)-C(248)-C(252) | 120.0 |
| C(247)-C(248)-C(252) | 108.0 |
| C(247)-C(249)-C(217) | 120.0 |
| C(247)-C(249)-C(241) | 120.0 |
| C(217)-C(249)-C(241) | 108.0 |

|                      |       |
|----------------------|-------|
| C(248)-C(250)-C(239) | 120.0 |
| C(248)-C(250)-C(251) | 120.0 |
| C(239)-C(250)-C(251) | 108.0 |
| C(254)-C(251)-C(244) | 120.0 |
| C(254)-C(251)-C(250) | 120.0 |
| C(244)-C(251)-C(250) | 108.0 |
| C(253)-C(252)-C(219) | 120.0 |
| C(253)-C(252)-C(248) | 120.0 |
| C(219)-C(252)-C(248) | 108.0 |
| C(252)-C(253)-C(272) | 120.0 |
| C(252)-C(253)-C(254) | 120.0 |
| C(272)-C(253)-C(254) | 108.0 |
| C(251)-C(254)-C(257) | 120.0 |
| C(251)-C(254)-C(253) | 120.0 |
| C(257)-C(254)-C(253) | 108.0 |
| C(258)-C(255)-C(256) | 120.0 |
| C(258)-C(255)-C(261) | 120.0 |
| C(256)-C(255)-C(261) | 108.0 |
| C(257)-C(256)-C(255) | 120.0 |
| C(257)-C(256)-C(245) | 120.0 |
| C(255)-C(256)-C(245) | 108.0 |
| C(256)-C(257)-C(254) | 120.0 |
| C(256)-C(257)-C(271) | 120.0 |
| C(254)-C(257)-C(271) | 108.0 |
| C(255)-C(258)-C(274) | 120.0 |
| C(255)-C(258)-C(262) | 120.0 |
| C(274)-C(258)-C(262) | 108.0 |
| C(262)-C(259)-C(265) | 120.0 |
| C(262)-C(259)-C(260) | 120.0 |
| C(265)-C(259)-C(260) | 108.0 |
| C(261)-C(260)-C(259) | 120.0 |
| C(261)-C(260)-C(237) | 120.0 |
| C(259)-C(260)-C(237) | 108.0 |
| C(260)-C(261)-C(255) | 120.0 |
| C(260)-C(261)-C(246) | 120.0 |
| C(255)-C(261)-C(246) | 108.0 |

|                      |       |
|----------------------|-------|
| C(259)-C(262)-C(266) | 120.0 |
| C(259)-C(262)-C(258) | 120.0 |
| C(266)-C(262)-C(258) | 108.0 |
| C(266)-C(263)-C(269) | 120.0 |
| C(266)-C(263)-C(264) | 120.0 |
| C(269)-C(263)-C(264) | 108.0 |
| C(265)-C(264)-C(263) | 120.0 |
| C(265)-C(264)-C(229) | 120.0 |
| C(263)-C(264)-C(229) | 108.0 |
| C(264)-C(265)-C(238) | 120.0 |
| C(264)-C(265)-C(259) | 120.0 |
| C(238)-C(265)-C(259) | 108.0 |
| C(263)-C(266)-C(270) | 120.0 |
| C(263)-C(266)-C(262) | 120.0 |
| C(270)-C(266)-C(262) | 108.0 |
| C(270)-C(267)-C(268) | 120.0 |
| C(270)-C(267)-C(273) | 120.0 |
| C(268)-C(267)-C(273) | 108.0 |
| C(269)-C(268)-C(267) | 120.0 |
| C(269)-C(268)-C(221) | 120.0 |
| C(267)-C(268)-C(221) | 108.0 |
| C(268)-C(269)-C(263) | 120.0 |
| C(268)-C(269)-C(230) | 120.0 |
| C(263)-C(269)-C(230) | 108.0 |
| C(267)-C(270)-C(266) | 120.0 |
| C(267)-C(270)-C(274) | 120.0 |
| C(266)-C(270)-C(274) | 108.0 |
| C(274)-C(271)-C(272) | 120.0 |
| C(274)-C(271)-C(257) | 120.0 |
| C(272)-C(271)-C(257) | 108.0 |
| C(273)-C(272)-C(271) | 120.0 |
| C(273)-C(272)-C(253) | 120.0 |
| C(271)-C(272)-C(253) | 108.0 |
| C(272)-C(273)-C(267) | 120.0 |
| C(272)-C(273)-C(222) | 120.0 |
| C(267)-C(273)-C(222) | 108.0 |

|                      |       |
|----------------------|-------|
| C(271)-C(274)-C(258) | 120.0 |
| C(271)-C(274)-C(270) | 120.0 |
| C(258)-C(274)-C(270) | 108.0 |
| C(57)-C(55)-C(56)    | 120.0 |
| C(57)-C(55)-C(66)    | 120.0 |
| C(56)-C(55)-C(66)    | 108.0 |
| C(58)-C(56)-C(55)    | 120.0 |
| C(58)-C(56)-C(60)    | 120.0 |
| C(55)-C(56)-C(60)    | 108.0 |
| C(55)-C(57)-C(89)    | 120.0 |
| C(55)-C(57)-C(65)    | 120.0 |
| C(89)-C(57)-C(65)    | 108.0 |
| C(56)-C(58)-C(87)    | 120.0 |
| C(56)-C(58)-C(59)    | 120.0 |
| C(87)-C(58)-C(59)    | 108.0 |
| C(62)-C(59)-C(58)    | 120.0 |
| C(62)-C(59)-C(92)    | 120.0 |
| C(58)-C(59)-C(92)    | 108.0 |
| C(61)-C(60)-C(56)    | 120.0 |
| C(61)-C(60)-C(67)    | 120.0 |
| C(56)-C(60)-C(67)    | 108.0 |
| C(60)-C(61)-C(108)   | 120.0 |
| C(60)-C(61)-C(62)    | 120.0 |
| C(108)-C(61)-C(62)   | 108.0 |
| C(59)-C(62)-C(113)   | 120.0 |
| C(59)-C(62)-C(61)    | 120.0 |
| C(113)-C(62)-C(61)   | 108.0 |
| C(65)-C(63)-C(74)    | 120.0 |
| C(65)-C(63)-C(64)    | 120.0 |
| C(74)-C(63)-C(64)    | 108.0 |
| C(66)-C(64)-C(68)    | 120.0 |
| C(66)-C(64)-C(63)    | 120.0 |
| C(68)-C(64)-C(63)    | 108.0 |
| C(63)-C(65)-C(57)    | 120.0 |
| C(63)-C(65)-C(73)    | 120.0 |
| C(57)-C(65)-C(73)    | 108.0 |

|                    |       |
|--------------------|-------|
| C(64)-C(66)-C(67)  | 120.0 |
| C(64)-C(66)-C(55)  | 120.0 |
| C(67)-C(66)-C(55)  | 108.0 |
| C(70)-C(67)-C(66)  | 120.0 |
| C(70)-C(67)-C(60)  | 120.0 |
| C(66)-C(67)-C(60)  | 108.0 |
| C(69)-C(68)-C(75)  | 120.0 |
| C(69)-C(68)-C(64)  | 120.0 |
| C(75)-C(68)-C(64)  | 108.0 |
| C(68)-C(69)-C(70)  | 120.0 |
| C(68)-C(69)-C(104) | 120.0 |
| C(70)-C(69)-C(104) | 108.0 |
| C(67)-C(70)-C(69)  | 120.0 |
| C(67)-C(70)-C(109) | 120.0 |
| C(69)-C(70)-C(109) | 108.0 |
| C(73)-C(71)-C(72)  | 120.0 |
| C(73)-C(71)-C(82)  | 120.0 |
| C(72)-C(71)-C(82)  | 108.0 |
| C(74)-C(72)-C(76)  | 120.0 |
| C(74)-C(72)-C(71)  | 120.0 |
| C(76)-C(72)-C(71)  | 108.0 |
| C(71)-C(73)-C(65)  | 120.0 |
| C(71)-C(73)-C(81)  | 120.0 |
| C(65)-C(73)-C(81)  | 108.0 |
| C(72)-C(74)-C(75)  | 120.0 |
| C(72)-C(74)-C(63)  | 120.0 |
| C(75)-C(74)-C(63)  | 108.0 |
| C(78)-C(75)-C(68)  | 120.0 |
| C(78)-C(75)-C(74)  | 120.0 |
| C(68)-C(75)-C(74)  | 108.0 |
| C(77)-C(76)-C(83)  | 120.0 |
| C(77)-C(76)-C(72)  | 120.0 |
| C(83)-C(76)-C(72)  | 108.0 |
| C(76)-C(77)-C(78)  | 120.0 |
| C(76)-C(77)-C(100) | 120.0 |
| C(78)-C(77)-C(100) | 108.0 |



|                    |       |
|--------------------|-------|
| C(75)-C(78)-C(77)  | 120.0 |
| C(75)-C(78)-C(105) | 120.0 |
| C(77)-C(78)-C(105) | 108.0 |
| C(81)-C(79)-C(80)  | 120.0 |
| C(81)-C(79)-C(90)  | 120.0 |
| C(80)-C(79)-C(90)  | 108.0 |
| C(82)-C(80)-C(79)  | 120.0 |
| C(82)-C(80)-C(84)  | 120.0 |
| C(79)-C(80)-C(84)  | 108.0 |
| C(79)-C(81)-C(73)  | 120.0 |
| C(79)-C(81)-C(89)  | 120.0 |
| C(73)-C(81)-C(89)  | 108.0 |
| C(80)-C(82)-C(71)  | 120.0 |
| C(80)-C(82)-C(83)  | 120.0 |
| C(71)-C(82)-C(83)  | 108.0 |
| C(86)-C(83)-C(76)  | 120.0 |
| C(86)-C(83)-C(82)  | 120.0 |
| C(76)-C(83)-C(82)  | 108.0 |
| C(85)-C(84)-C(91)  | 120.0 |
| C(85)-C(84)-C(80)  | 120.0 |
| C(91)-C(84)-C(80)  | 108.0 |
| C(84)-C(85)-C(86)  | 120.0 |
| C(84)-C(85)-C(96)  | 120.0 |
| C(86)-C(85)-C(96)  | 108.0 |
| C(83)-C(86)-C(85)  | 120.0 |
| C(83)-C(86)-C(101) | 120.0 |
| C(85)-C(86)-C(101) | 108.0 |
| C(89)-C(87)-C(58)  | 120.0 |
| C(89)-C(87)-C(88)  | 120.0 |
| C(58)-C(87)-C(88)  | 108.0 |
| C(90)-C(88)-C(92)  | 120.0 |
| C(90)-C(88)-C(87)  | 120.0 |
| C(92)-C(88)-C(87)  | 108.0 |
| C(87)-C(89)-C(57)  | 120.0 |
| C(87)-C(89)-C(81)  | 120.0 |
| C(57)-C(89)-C(81)  | 108.0 |

|                     |       |
|---------------------|-------|
| C(88)-C(90)-C(91)   | 120.0 |
| C(88)-C(90)-C(79)   | 120.0 |
| C(91)-C(90)-C(79)   | 108.0 |
| C(94)-C(91)-C(90)   | 120.0 |
| C(94)-C(91)-C(84)   | 120.0 |
| C(90)-C(91)-C(84)   | 108.0 |
| C(93)-C(92)-C(59)   | 120.0 |
| C(93)-C(92)-C(88)   | 120.0 |
| C(59)-C(92)-C(88)   | 108.0 |
| C(92)-C(93)-C(94)   | 120.0 |
| C(92)-C(93)-C(112)  | 120.0 |
| C(94)-C(93)-C(112)  | 108.0 |
| C(91)-C(94)-C(97)   | 120.0 |
| C(91)-C(94)-C(93)   | 120.0 |
| C(97)-C(94)-C(93)   | 108.0 |
| C(98)-C(95)-C(96)   | 120.0 |
| C(98)-C(95)-C(101)  | 120.0 |
| C(96)-C(95)-C(101)  | 108.0 |
| C(97)-C(96)-C(95)   | 120.0 |
| C(97)-C(96)-C(85)   | 120.0 |
| C(95)-C(96)-C(85)   | 108.0 |
| C(96)-C(97)-C(94)   | 120.0 |
| C(96)-C(97)-C(111)  | 120.0 |
| C(94)-C(97)-C(111)  | 108.0 |
| C(95)-C(98)-C(114)  | 120.0 |
| C(95)-C(98)-C(102)  | 120.0 |
| C(114)-C(98)-C(102) | 108.0 |
| C(102)-C(99)-C(100) | 120.0 |
| C(102)-C(99)-C(105) | 120.0 |
| C(100)-C(99)-C(105) | 108.0 |
| C(101)-C(100)-C(77) | 120.0 |
| C(101)-C(100)-C(99) | 120.0 |
| C(77)-C(100)-C(99)  | 108.0 |
| C(100)-C(101)-C(86) | 120.0 |
| C(100)-C(101)-C(95) | 120.0 |
| C(86)-C(101)-C(95)  | 108.0 |

|                      |       |
|----------------------|-------|
| C(99)-C(102)-C(98)   | 120.0 |
| C(99)-C(102)-C(106)  | 120.0 |
| C(98)-C(102)-C(106)  | 108.0 |
| C(106)-C(103)-C(109) | 120.0 |
| C(106)-C(103)-C(104) | 120.0 |
| C(109)-C(103)-C(104) | 108.0 |
| C(105)-C(104)-C(103) | 120.0 |
| C(105)-C(104)-C(69)  | 120.0 |
| C(103)-C(104)-C(69)  | 108.0 |
| C(104)-C(105)-C(78)  | 120.0 |
| C(104)-C(105)-C(99)  | 120.0 |
| C(78)-C(105)-C(99)   | 108.0 |
| C(103)-C(106)-C(110) | 120.0 |
| C(103)-C(106)-C(102) | 120.0 |
| C(110)-C(106)-C(102) | 108.0 |
| C(110)-C(107)-C(108) | 120.0 |
| C(110)-C(107)-C(113) | 120.0 |
| C(108)-C(107)-C(113) | 108.0 |
| C(109)-C(108)-C(61)  | 120.0 |
| C(109)-C(108)-C(107) | 120.0 |
| C(61)-C(108)-C(107)  | 108.0 |
| C(108)-C(109)-C(103) | 120.0 |
| C(108)-C(109)-C(70)  | 120.0 |
| C(103)-C(109)-C(70)  | 108.0 |
| C(107)-C(110)-C(114) | 120.0 |
| C(107)-C(110)-C(106) | 120.0 |
| C(114)-C(110)-C(106) | 108.0 |
| C(114)-C(111)-C(112) | 120.0 |
| C(114)-C(111)-C(97)  | 120.0 |
| C(112)-C(111)-C(97)  | 108.0 |
| C(113)-C(112)-C(111) | 120.0 |
| C(113)-C(112)-C(93)  | 120.0 |
| C(111)-C(112)-C(93)  | 108.0 |
| C(112)-C(113)-C(62)  | 120.0 |
| C(112)-C(113)-C(107) | 120.0 |
| C(62)-C(113)-C(107)  | 108.0 |

|                      |          |
|----------------------|----------|
| C(111)-C(114)-C(98)  | 120.0    |
| C(111)-C(114)-C(110) | 120.0    |
| C(98)-C(114)-C(110)  | 108.0    |
| C(52)-O(10)-C(53)    | 112.0    |
| C(52)-C(51)-H(51A)   | 109.5    |
| C(52)-C(51)-H(51B)   | 109.5    |
| H(51A)-C(51)-H(51B)  | 109.5    |
| C(52)-C(51)-H(51C)   | 109.5    |
| H(51A)-C(51)-H(51C)  | 109.5    |
| H(51B)-C(51)-H(51C)  | 109.5    |
| O(10)-C(52)-C(51)    | 109.6    |
| O(10)-C(52)-H(52)    | 125.2    |
| C(51)-C(52)-H(52)    | 125.2    |
| O(10)-C(53)-C(54)    | 108.5    |
| O(10)-C(53)-H(53A)   | 110.0    |
| C(54)-C(53)-H(53A)   | 110.0    |
| O(10)-C(53)-H(53B)   | 110.0    |
| C(54)-C(53)-H(53B)   | 110.0    |
| H(53A)-C(53)-H(53B)  | 108.4    |
| C(53)-C(54)-H(54A)   | 109.5    |
| C(53)-C(54)-H(54B)   | 109.5    |
| H(54A)-C(54)-H(54B)  | 109.5    |
| C(53)-C(54)-H(54C)   | 109.5    |
| H(54A)-C(54)-H(54C)  | 109.5    |
| H(54B)-C(54)-H(54C)  | 109.5    |
| Cl(4)-C(50)-Cl(5)    | 111.0(7) |
| Cl(4)-C(50)-Cl(6)    | 110.1(8) |
| Cl(5)-C(50)-Cl(6)    | 108.1(7) |
| Cl(4)-C(50)-H(50)    | 109.2    |
| Cl(5)-C(50)-H(50)    | 109.2    |
| Cl(6)-C(50)-H(50)    | 109.2    |

---

Symmetry transformations used to generate equivalent atoms:

Table 4. Anisotropic displacement parameters ( $\text{\AA}^2 \times 10^3$ ) for 19949ds\_sq. The anisotropic displacement factor exponent takes the form:  $-2p^2[h^2 a^{*2}U^{11} + \dots + 2 h k a^* b^* U^{12}]$

|       | U <sup>11</sup> | U <sup>22</sup> | U <sup>33</sup> | U <sup>23</sup> | U <sup>13</sup> | U <sup>12</sup> |
|-------|-----------------|-----------------|-----------------|-----------------|-----------------|-----------------|
| I(1)  | 18(1)           | 10(1)           | 15(1)           | 1(1)            | -2(1)           | 0(1)            |
| I(2)  | 18(1)           | 9(1)            | 13(1)           | -1(1)           | -1(1)           | 1(1)            |
| I(3)  | 13(1)           | 12(1)           | 14(1)           | -1(1)           | -2(1)           | 0(1)            |
| Cl(1) | 37(1)           | 35(1)           | 37(1)           | -1(1)           | 1(1)            | -3(1)           |
| Cl(2) | 47(1)           | 36(1)           | 33(1)           | 0(1)            | 2(1)            | 6(1)            |
| Cl(3) | 37(1)           | 27(1)           | 48(1)           | -1(1)           | -1(1)           | 1(1)            |
| O(1)  | 21(3)           | 14(2)           | 17(3)           | -2(2)           | -5(2)           | 1(2)            |
| O(2)  | 41(3)           | 14(3)           | 25(3)           | 1(3)            | -17(3)          | -2(3)           |
| O(3)  | 39(3)           | 12(2)           | 20(3)           | -2(2)           | -7(2)           | 0(3)            |
| O(4)  | 30(3)           | 8(2)            | 17(3)           | 1(2)            | -3(2)           | 0(2)            |
| O(5)  | 39(3)           | 12(3)           | 18(3)           | -1(2)           | -11(2)          | 0(2)            |
| O(6)  | 32(3)           | 17(3)           | 16(3)           | -3(2)           | -8(2)           | 1(2)            |
| O(7)  | 31(3)           | 9(3)            | 19(3)           | -2(2)           | -5(2)           | 4(2)            |
| O(8)  | 31(3)           | 10(2)           | 24(3)           | -3(2)           | -13(2)          | 2(2)            |
| O(9)  | 31(3)           | 16(3)           | 33(3)           | 4(2)            | -17(3)          | -1(2)           |
| N(1)  | 21(3)           | 9(3)            | 18(3)           | -1(2)           | -5(2)           | 1(2)            |
| N(2)  | 21(3)           | 11(3)           | 15(3)           | -1(2)           | -6(2)           | 3(2)            |
| N(3)  | 17(3)           | 13(3)           | 17(3)           | 0(2)            | -5(2)           | 0(2)            |
| C(1)  | 20(3)           | 13(3)           | 16(3)           | 3(3)            | -2(3)           | 2(3)            |
| C(2)  | 22(3)           | 12(3)           | 11(3)           | 0(2)            | -4(3)           | 0(3)            |
| C(3)  | 21(4)           | 15(3)           | 15(3)           | 2(3)            | 0(3)            | 1(3)            |
| C(4)  | 19(3)           | 10(3)           | 14(3)           | 1(2)            | 4(3)            | -1(3)           |
| C(5)  | 19(3)           | 15(3)           | 16(3)           | -1(3)           | 5(3)            | 2(3)            |
| C(6)  | 17(3)           | 14(3)           | 12(3)           | 3(2)            | 2(3)            | 4(3)            |
| C(7)  | 23(4)           | 14(3)           | 20(4)           | 5(3)            | 2(3)            | 5(3)            |
| C(8)  | 22(4)           | 26(4)           | 21(4)           | 6(3)            | -3(3)           | 3(3)            |
| C(9)  | 28(4)           | 21(4)           | 21(4)           | 3(3)            | -12(3)          | 2(3)            |
| C(10) | 24(4)           | 13(3)           | 21(4)           | 1(3)            | 0(3)            | 1(3)            |
| C(11) | 15(3)           | 13(3)           | 18(3)           | -3(3)           | -1(3)           | 2(3)            |
| C(12) | 17(3)           | 11(3)           | 14(3)           | 2(2)            | 2(3)            | -1(2)           |
| C(13) | 15(3)           | 8(3)            | 14(3)           | 4(2)            | 0(2)            | 2(2)            |

|       |       |       |       |        |        |        |
|-------|-------|-------|-------|--------|--------|--------|
| C(14) | 36(5) | 32(5) | 17(4) | -3(3)  | -4(3)  | 17(4)  |
| C(15) | 61(7) | 21(4) | 21(4) | -4(3)  | 8(4)   | 5(4)   |
| C(16) | 31(5) | 66(8) | 24(4) | -3(5)  | 3(4)   | -2(5)  |
| C(17) | 20(3) | 8(3)  | 17(3) | 1(3)   | -3(3)  | -1(3)  |
| C(18) | 23(4) | 9(3)  | 17(3) | 2(3)   | -5(3)  | 0(3)   |
| C(19) | 19(3) | 8(3)  | 16(3) | 2(2)   | -1(3)  | 2(2)   |
| C(20) | 13(3) | 16(3) | 11(3) | 1(2)   | 0(2)   | 2(3)   |
| C(21) | 15(3) | 13(3) | 17(3) | -3(2)  | 2(2)   | -3(2)  |
| C(22) | 15(3) | 13(3) | 17(3) | 1(3)   | 4(3)   | 2(2)   |
| C(23) | 23(4) | 12(3) | 21(4) | -2(3)  | 3(3)   | -1(3)  |
| C(24) | 33(4) | 15(4) | 23(4) | 1(3)   | 4(3)   | 2(3)   |
| C(25) | 34(4) | 15(4) | 24(4) | 5(3)   | -8(3)  | 2(3)   |
| C(26) | 28(4) | 19(4) | 19(3) | -3(3)  | 1(3)   | -1(3)  |
| C(27) | 19(3) | 12(3) | 21(3) | 2(3)   | 4(3)   | -1(3)  |
| C(28) | 20(3) | 14(3) | 16(3) | -2(3)  | -1(3)  | 1(3)   |
| C(29) | 13(3) | 10(3) | 16(3) | 0(2)   | 3(2)   | -1(2)  |
| C(30) | 23(4) | 13(3) | 45(5) | 5(3)   | -14(4) | 0(3)   |
| C(31) | 38(5) | 24(4) | 38(5) | -6(4)  | -23(4) | 10(4)  |
| C(32) | 28(5) | 44(6) | 52(6) | 19(5)  | 9(4)   | 13(4)  |
| C(33) | 22(3) | 13(3) | 15(3) | -2(3)  | -6(3)  | 0(3)   |
| C(34) | 24(4) | 13(3) | 15(3) | 1(3)   | -5(3)  | -2(3)  |
| C(35) | 18(3) | 15(3) | 20(4) | 2(3)   | -3(3)  | 1(3)   |
| C(36) | 15(3) | 13(3) | 14(3) | 2(3)   | -1(2)  | -1(3)  |
| C(37) | 15(3) | 19(4) | 15(3) | 1(3)   | -1(2)  | 0(3)   |
| C(38) | 12(3) | 18(3) | 15(3) | -4(3)  | 5(2)   | -5(3)  |
| C(39) | 16(3) | 25(4) | 16(3) | 2(3)   | -3(3)  | -4(3)  |
| C(40) | 21(4) | 25(4) | 23(4) | -4(3)  | -1(3)  | -4(3)  |
| C(41) | 24(4) | 19(4) | 24(4) | -8(3)  | -2(3)  | -5(3)  |
| C(42) | 19(3) | 24(4) | 17(3) | -1(3)  | -2(3)  | -3(3)  |
| C(43) | 11(3) | 16(3) | 17(3) | -5(3)  | 1(2)   | -2(3)  |
| C(44) | 12(3) | 15(3) | 15(3) | -1(3)  | -1(2)  | -5(3)  |
| C(45) | 16(3) | 10(3) | 12(3) | -1(2)  | -2(2)  | -2(2)  |
| C(46) | 46(5) | 23(4) | 13(3) | 0(3)   | -4(3)  | -17(4) |
| C(47) | 56(7) | 41(6) | 49(6) | -15(5) | 29(6)  | -17(5) |
| C(48) | 46(6) | 27(5) | 39(5) | 18(4)  | -19(4) | -15(4) |
| C(49) | 38(5) | 35(5) | 36(5) | 4(4)   | 5(4)   | 7(4)   |

|        |       |       |       |        |        |        |
|--------|-------|-------|-------|--------|--------|--------|
| C(115) | 69(6) | 64(6) | 81(6) | -12(5) | 9(5)   | -22(5) |
| C(116) | 80(6) | 59(6) | 80(6) | -26(6) | 4(6)   | -8(6)  |
| C(117) | 57(5) | 76(6) | 76(6) | -3(5)  | -1(5)  | -22(5) |
| C(118) | 75(6) | 76(6) | 63(6) | -21(5) | 3(5)   | -5(5)  |
| C(119) | 66(6) | 72(6) | 50(5) | -17(5) | 26(5)  | 15(5)  |
| C(120) | 77(6) | 48(6) | 83(6) | -13(6) | 8(6)   | 8(6)   |
| C(121) | 73(6) | 56(6) | 74(6) | -9(5)  | 13(6)  | 23(5)  |
| C(122) | 70(6) | 69(6) | 70(6) | -12(6) | 24(6)  | 22(6)  |
| C(123) | 51(5) | 83(6) | 78(6) | 14(6)  | 21(5)  | -19(5) |
| C(124) | 63(5) | 69(6) | 74(6) | 17(5)  | 18(5)  | -26(5) |
| C(125) | 39(5) | 80(6) | 76(6) | 11(6)  | 7(5)   | -19(5) |
| C(126) | 69(6) | 56(6) | 82(6) | 3(5)   | 12(6)  | -23(5) |
| C(127) | 79(6) | 50(6) | 84(6) | 12(6)  | 0(6)   | -6(6)  |
| C(128) | 70(6) | 75(6) | 65(5) | 29(5)  | 19(5)  | -11(5) |
| C(129) | 76(6) | 71(6) | 63(5) | 31(5)  | 7(5)   | -2(5)  |
| C(130) | 81(6) | 56(5) | 79(6) | 24(5)  | -1(5)  | 3(5)   |
| C(131) | 54(6) | 83(6) | 88(6) | 6(6)   | 13(6)  | 21(6)  |
| C(132) | 53(5) | 78(6) | 78(6) | -2(6)  | 33(5)  | 22(5)  |
| C(133) | 50(5) | 86(6) | 83(6) | 11(6)  | 0(5)   | 6(5)   |
| C(134) | 55(6) | 90(6) | 73(6) | 12(6)  | 36(5)  | -2(6)  |
| C(135) | 68(6) | 86(6) | 62(6) | 13(6)  | 34(5)  | -2(6)  |
| C(136) | 76(6) | 73(6) | 80(6) | -18(6) | 32(6)  | 27(6)  |
| C(137) | 75(6) | 73(6) | 57(6) | -21(5) | 28(5)  | 17(6)  |
| C(138) | 78(6) | 88(6) | 53(6) | 2(6)   | 24(6)  | 8(6)   |
| C(139) | 64(6) | 75(6) | 62(6) | 20(6)  | -12(5) | 17(6)  |
| C(140) | 74(6) | 67(6) | 85(6) | 24(6)  | 3(6)   | 21(6)  |
| C(141) | 56(6) | 89(6) | 71(6) | 16(6)  | -11(5) | 3(6)   |
| C(142) | 61(6) | 60(6) | 81(6) | 9(6)   | 9(6)   | 35(5)  |
| C(143) | 78(6) | 55(6) | 83(6) | -12(5) | 17(6)  | 27(5)  |
| C(144) | 80(6) | 53(6) | 79(6) | 27(5)  | 8(6)   | 11(6)  |
| C(145) | 86(6) | 47(6) | 88(6) | 5(6)   | 9(6)   | -2(6)  |
| C(146) | 81(6) | 44(5) | 89(6) | -16(6) | 14(6)  | 12(5)  |
| C(147) | 75(6) | 88(6) | 56(6) | -8(6)  | -3(6)  | -7(6)  |
| C(148) | 70(6) | 83(6) | 45(5) | 4(5)   | 7(5)   | 4(5)   |
| C(149) | 63(6) | 89(6) | 66(6) | -3(6)  | -13(5) | -5(6)  |
| C(150) | 71(6) | 80(6) | 54(5) | 26(5)  | -3(5)  | 0(6)   |

|        |       |       |       |        |        |        |
|--------|-------|-------|-------|--------|--------|--------|
| C(151) | 78(6) | 68(6) | 62(6) | 32(5)  | 12(5)  | -1(6)  |
| C(152) | 72(6) | 83(6) | 50(6) | 1(6)   | 22(6)  | 10(6)  |
| C(153) | 64(5) | 79(6) | 58(5) | 13(5)  | 29(5)  | -1(5)  |
| C(154) | 72(6) | 71(6) | 63(5) | 24(5)  | 21(5)  | -8(5)  |
| C(155) | 76(6) | 63(6) | 80(6) | -18(5) | 12(6)  | -23(5) |
| C(156) | 74(6) | 53(6) | 79(6) | 1(5)   | 15(6)  | -19(5) |
| C(157) | 69(6) | 64(5) | 73(6) | 15(5)  | 20(5)  | -22(5) |
| C(158) | 64(6) | 78(6) | 74(6) | -10(5) | -3(5)  | -25(5) |
| C(159) | 78(6) | 86(6) | 55(6) | -13(6) | -4(6)  | -7(6)  |
| C(160) | 85(6) | 74(6) | 69(6) | -28(5) | 4(5)   | -3(5)  |
| C(161) | 88(7) | 63(6) | 87(6) | -29(6) | 14(6)  | -5(6)  |
| C(162) | 61(6) | 85(6) | 63(6) | -7(6)  | -11(5) | -5(6)  |
| C(163) | 65(6) | 70(6) | 55(6) | 20(6)  | -21(5) | 18(6)  |
| C(164) | 74(6) | 77(6) | 50(6) | 30(6)  | -9(6)  | -2(6)  |
| C(165) | 75(6) | 84(6) | 45(5) | 6(5)   | 8(5)   | 1(6)   |
| C(166) | 53(6) | 85(6) | 65(6) | 16(6)  | -18(6) | 2(6)   |
| C(167) | 53(5) | 80(6) | 77(6) | 10(6)  | 8(5)   | 18(6)  |
| C(168) | 61(6) | 60(6) | 73(6) | 11(6)  | -2(5)  | 24(5)  |
| C(169) | 72(6) | 63(6) | 78(6) | 22(6)  | -5(6)  | 18(6)  |
| C(170) | 48(5) | 84(6) | 76(6) | 12(6)  | -4(6)  | 4(6)   |
| C(171) | 55(5) | 75(6) | 72(6) | 14(5)  | 21(5)  | -20(5) |
| C(172) | 52(6) | 80(6) | 61(6) | 10(6)  | 33(5)  | -4(6)  |
| C(173) | 50(5) | 76(6) | 70(6) | 1(5)   | 24(5)  | 15(5)  |
| C(174) | 45(5) | 80(6) | 71(6) | 6(6)   | 4(5)   | -20(5) |
| C(215) | 67(6) | 77(6) | 70(6) | 22(5)  | 27(5)  | -12(6) |
| C(216) | 71(6) | 57(6) | 73(6) | 24(5)  | 11(6)  | -11(6) |
| C(217) | 56(6) | 80(6) | 76(6) | 16(6)  | 27(5)  | -15(5) |
| C(218) | 66(6) | 52(6) | 78(6) | 9(6)   | 8(6)   | -14(6) |
| C(219) | 74(6) | 51(5) | 80(6) | -2(6)  | 8(6)   | 0(6)   |
| C(220) | 79(6) | 69(6) | 68(6) | 30(6)  | 2(6)   | 1(6)   |
| C(221) | 71(6) | 64(6) | 76(6) | 27(6)  | -5(6)  | 14(6)  |
| C(222) | 74(6) | 55(6) | 85(6) | 9(6)   | 2(6)   | 14(6)  |
| C(223) | 67(6) | 83(6) | 68(6) | 0(6)   | 35(5)  | 15(6)  |
| C(224) | 73(7) | 84(7) | 53(6) | 0(6)   | 30(6)  | 8(6)   |
| C(225) | 50(6) | 82(7) | 81(6) | 9(6)   | 33(6)  | 7(6)   |
| C(226) | 72(6) | 81(6) | 53(6) | 21(6)  | 21(6)  | -2(6)  |



|        |       |       |       |        |        |        |
|--------|-------|-------|-------|--------|--------|--------|
| C(227) | 79(7) | 79(6) | 54(6) | 27(6)  | 5(6)   | -1(6)  |
| C(228) | 83(6) | 83(6) | 59(6) | -14(6) | 13(6)  | 6(6)   |
| C(229) | 79(7) | 86(7) | 58(6) | -11(6) | -5(6)  | -5(6)  |
| C(230) | 75(7) | 84(7) | 52(6) | 13(6)  | -11(6) | 1(6)   |
| C(231) | 54(6) | 74(6) | 84(6) | 12(6)  | 9(6)   | 25(6)  |
| C(232) | 62(6) | 66(6) | 85(6) | -4(6)  | 20(6)  | 32(6)  |
| C(233) | 38(6) | 77(7) | 80(7) | 4(6)   | 17(6)  | 12(6)  |
| C(234) | 74(6) | 73(6) | 78(6) | -16(6) | 30(6)  | 27(6)  |
| C(235) | 83(6) | 67(6) | 75(6) | -23(6) | 19(6)  | 12(6)  |
| C(236) | 75(6) | 54(6) | 87(6) | 6(6)   | 11(6)  | 21(6)  |
| C(237) | 80(6) | 47(6) | 83(6) | -10(6) | 17(6)  | 4(6)   |
| C(238) | 84(7) | 60(6) | 83(7) | -27(6) | 14(6)  | -4(6)  |
| C(239) | 53(6) | 85(6) | 76(6) | 1(6)   | -9(6)  | -5(6)  |
| C(240) | 60(6) | 85(6) | 67(6) | 15(6)  | -10(6) | 4(6)   |
| C(241) | 46(6) | 80(6) | 81(6) | 6(6)   | 2(6)   | -8(6)  |
| C(242) | 61(6) | 77(6) | 80(6) | 14(6)  | -3(6)  | 18(6)  |
| C(243) | 73(6) | 61(6) | 83(6) | 28(6)  | 1(6)   | 18(6)  |
| C(244) | 68(6) | 87(6) | 57(6) | 10(6)  | -8(6)  | 2(6)   |
| C(245) | 75(6) | 79(6) | 57(6) | 23(6)  | 6(6)   | 4(6)   |
| C(246) | 79(6) | 67(6) | 71(6) | 28(6)  | 7(6)   | 7(6)   |
| C(247) | 62(6) | 61(6) | 77(7) | -1(6)  | 11(6)  | -20(6) |
| C(248) | 74(6) | 66(6) | 75(7) | -14(6) | 0(6)   | -16(6) |
| C(249) | 53(6) | 70(6) | 80(6) | 5(6)   | 12(6)  | -22(5) |
| C(250) | 69(6) | 82(6) | 72(6) | -10(6) | -6(6)  | -11(6) |
| C(251) | 75(6) | 88(7) | 56(6) | -7(6)  | -3(6)  | -4(6)  |
| C(252) | 79(7) | 59(6) | 80(6) | -22(6) | 8(6)   | -6(6)  |
| C(253) | 76(6) | 66(6) | 72(6) | -19(6) | 14(6)  | 10(6)  |
| C(254) | 78(6) | 82(6) | 57(6) | -12(6) | 10(6)  | 6(6)   |
| C(255) | 66(6) | 72(6) | 66(6) | 19(5)  | 25(5)  | -10(5) |
| C(256) | 71(6) | 78(6) | 52(6) | 18(5)  | 19(5)  | 1(6)   |
| C(257) | 71(6) | 82(6) | 50(6) | 0(6)   | 25(6)  | 9(6)   |
| C(258) | 56(6) | 73(6) | 68(6) | 14(6)  | 25(5)  | -15(5) |
| C(259) | 68(6) | 58(6) | 75(7) | -5(6)  | 11(6)  | -25(6) |
| C(260) | 72(6) | 49(6) | 79(6) | 4(5)   | 14(6)  | -10(6) |
| C(261) | 75(6) | 55(6) | 71(6) | 23(5)  | 18(6)  | -11(5) |
| C(262) | 59(6) | 67(6) | 75(6) | 1(6)   | 10(6)  | -25(5) |

|        |         |         |         |         |         |         |
|--------|---------|---------|---------|---------|---------|---------|
| C(263) | 57(6)   | 85(6)   | 72(6)   | 0(6)    | -13(6)  | -8(6)   |
| C(264) | 77(6)   | 81(6)   | 70(6)   | -14(6)  | -5(6)   | -15(6)  |
| C(265) | 80(7)   | 66(6)   | 77(7)   | -20(6)  | -1(6)   | -17(6)  |
| C(266) | 52(5)   | 80(6)   | 73(6)   | 3(6)    | -5(5)   | -10(6)  |
| C(267) | 55(6)   | 75(6)   | 79(6)   | 12(6)   | 4(6)    | 18(6)   |
| C(268) | 62(6)   | 77(6)   | 74(6)   | 17(6)   | -10(6)  | 15(6)   |
| C(269) | 64(6)   | 84(7)   | 61(6)   | 16(6)   | -20(6)  | 5(6)    |
| C(270) | 43(6)   | 78(7)   | 73(6)   | 6(6)    | 8(6)    | 5(6)    |
| C(271) | 63(6)   | 79(6)   | 60(6)   | 0(6)    | 30(5)   | 11(6)   |
| C(272) | 70(6)   | 70(6)   | 73(6)   | -12(6)  | 21(6)   | 21(6)   |
| C(273) | 60(6)   | 66(6)   | 78(6)   | -2(6)   | 11(6)   | 24(6)   |
| C(274) | 53(6)   | 78(6)   | 70(6)   | 9(6)    | 29(6)   | 2(6)    |
| C(55)  | 56(9)   | 98(11)  | 137(11) | -8(10)  | 12(10)  | 47(9)   |
| C(56)  | 67(10)  | 104(11) | 130(11) | 16(11)  | -17(10) | 40(10)  |
| C(57)  | 43(9)   | 113(11) | 120(11) | -31(10) | 28(9)   | 9(9)    |
| C(58)  | 52(9)   | 112(11) | 100(11) | 4(10)   | -40(9)  | 21(9)   |
| C(59)  | 91(10)  | 120(11) | 76(10)  | 1(10)   | -41(9)  | 4(10)   |
| C(60)  | 95(11)  | 92(11)  | 118(11) | 27(10)  | -10(10) | 40(10)  |
| C(61)  | 108(11) | 89(10)  | 75(10)  | 42(10)  | -3(10)  | 40(10)  |
| C(62)  | 95(10)  | 108(11) | 55(9)   | 22(10)  | -16(9)  | 25(10)  |
| C(63)  | 67(9)   | 85(10)  | 59(9)   | -48(8)  | 43(8)   | 2(9)    |
| C(64)  | 105(10) | 82(10)  | 93(10)  | -50(9)  | 31(9)   | 31(9)   |
| C(65)  | 61(9)   | 102(11) | 88(10)  | -26(9)  | 57(8)   | -7(9)   |
| C(66)  | 100(11) | 95(10)  | 137(11) | -23(10) | 11(10)  | 48(10)  |
| C(67)  | 85(11)  | 68(10)  | 122(12) | 1(10)   | 12(10)  | 45(9)   |
| C(68)  | 106(11) | 74(10)  | 85(10)  | -54(9)  | 11(10)  | -6(10)  |
| C(69)  | 111(11) | 72(10)  | 109(11) | -29(10) | -17(10) | -19(10) |
| C(70)  | 114(11) | 74(10)  | 119(12) | -5(10)  | 0(11)   | 0(11)   |
| C(71)  | 105(11) | 97(11)  | 70(10)  | 25(10)  | 40(10)  | 3(10)   |
| C(72)  | 98(11)  | 106(11) | 42(9)   | 11(9)   | 18(9)   | 21(10)  |
| C(73)  | 81(10)  | 108(11) | 96(11)  | 4(10)   | 48(9)   | -22(10) |
| C(74)  | 84(10)  | 96(10)  | 35(8)   | -31(9)  | 16(8)   | 2(9)    |
| C(75)  | 100(11) | 94(11)  | 71(10)  | -42(9)  | -9(9)   | -7(10)  |
| C(76)  | 95(11)  | 110(11) | 53(10)  | 18(10)  | -13(9)  | 28(10)  |
| C(77)  | 99(11)  | 115(11) | 81(10)  | 0(10)   | -42(10) | 8(10)   |
| C(78)  | 80(10)  | 102(11) | 71(10)  | -28(10) | -34(9)  | -22(10) |

|        |         |         |         |         |         |         |
|--------|---------|---------|---------|---------|---------|---------|
| C(79)  | 103(11) | 97(11)  | 131(11) | 16(10)  | 10(10)  | -43(10) |
| C(80)  | 113(11) | 71(10)  | 115(11) | 30(10)  | 22(10)  | -25(10) |
| C(81)  | 57(9)   | 99(11)  | 113(11) | 9(10)   | 42(9)   | -47(9)  |
| C(82)  | 116(11) | 90(11)  | 100(11) | 35(10)  | 25(10)  | 1(10)   |
| C(83)  | 101(11) | 82(10)  | 78(10)  | 45(9)   | 5(10)   | 44(10)  |
| C(84)  | 121(11) | 58(9)   | 122(12) | 12(10)  | 3(10)   | -6(10)  |
| C(85)  | 98(11)  | 42(9)   | 120(11) | 15(9)   | 14(10)  | 33(9)   |
| C(86)  | 97(11)  | 73(10)  | 111(11) | 35(10)  | -2(10)  | 39(10)  |
| C(87)  | 37(8)   | 116(11) | 118(11) | -3(10)  | -23(9)  | -22(9)  |
| C(88)  | 45(9)   | 98(11)  | 83(10)  | -22(9)  | -22(8)  | -40(9)  |
| C(89)  | 28(8)   | 114(11) | 126(11) | -15(10) | 21(9)   | -22(9)  |
| C(90)  | 83(10)  | 75(10)  | 104(11) | -10(10) | -13(10) | -57(9)  |
| C(91)  | 113(11) | 69(10)  | 112(11) | -13(10) | -15(10) | -23(10) |
| C(92)  | 66(9)   | 101(11) | 65(10)  | -30(9)  | -21(9)  | -22(9)  |
| C(93)  | 89(10)  | 85(10)  | 62(9)   | -41(9)  | -4(9)   | -12(9)  |
| C(94)  | 109(11) | 67(10)  | 81(10)  | -38(9)  | 8(10)   | -12(10) |
| C(95)  | 78(10)  | 92(11)  | 131(11) | -8(10)  | 16(10)  | 36(10)  |
| C(96)  | 114(11) | 83(10)  | 129(11) | -20(10) | 9(10)   | 31(10)  |
| C(97)  | 109(11) | 71(10)  | 76(10)  | -35(9)  | 27(9)   | 24(10)  |
| C(98)  | 70(10)  | 110(11) | 113(11) | -32(10) | 29(10)  | 11(10)  |
| C(99)  | 57(10)  | 107(11) | 119(11) | -2(10)  | -21(10) | -19(10) |
| C(100) | 65(10)  | 99(11)  | 102(11) | 0(10)   | -32(10) | 20(10)  |
| C(101) | 75(10)  | 91(11)  | 121(11) | 11(10)  | -11(10) | 36(10)  |
| C(102) | 64(10)  | 114(11) | 126(11) | -17(11) | 12(10)  | -18(10) |
| C(103) | 109(11) | 96(11)  | 119(11) | -2(10)  | 11(11)  | -39(10) |
| C(104) | 90(10)  | 73(10)  | 97(11)  | -20(9)  | -20(10) | -53(9)  |
| C(105) | 65(10)  | 92(11)  | 94(11)  | -26(10) | -26(9)  | -44(9)  |
| C(106) | 82(10)  | 104(11) | 108(11) | -3(10)  | 34(10)  | -36(10) |
| C(107) | 115(11) | 102(11) | 58(10)  | 18(10)  | 37(10)  | 4(10)   |
| C(108) | 127(11) | 97(11)  | 86(11)  | 23(10)  | 9(10)   | 6(11)   |
| C(109) | 118(11) | 79(10)  | 101(11) | 7(10)   | 10(11)  | -19(10) |
| C(110) | 101(11) | 116(11) | 83(10)  | -2(10)  | 43(10)  | -20(10) |
| C(111) | 76(10)  | 80(10)  | 52(9)   | -43(8)  | 34(8)   | 3(9)    |
| C(112) | 80(10)  | 85(10)  | 30(8)   | -26(8)  | 23(8)   | 7(9)    |
| C(113) | 99(10)  | 97(11)  | 33(8)   | 12(9)   | 16(9)   | 23(10)  |
| C(114) | 79(10)  | 106(11) | 82(10)  | -28(10) | 47(9)   | -4(10)  |

|       |        |        |        |         |        |         |
|-------|--------|--------|--------|---------|--------|---------|
| O(10) | 41(8)  | 47(8)  | 42(8)  | 7(6)    | -6(6)  | 2(6)    |
| C(51) | 39(10) | 53(13) | 33(10) | -13(9)  | 4(8)   | -4(9)   |
| C(52) | 33(9)  | 54(10) | 37(10) | 16(8)   | -3(8)  | 11(8)   |
| C(53) | 53(12) | 57(11) | 56(12) | 3(10)   | -7(10) | -1(10)  |
| C(54) | 52(14) | 49(14) | 83(18) | -11(13) | 4(14)  | -11(12) |
| Cl(4) | 88(3)  | 77(3)  | 45(2)  | -2(2)   | 3(2)   | -26(2)  |
| Cl(5) | 61(2)  | 49(2)  | 82(3)  | 7(2)    | -1(2)  | -3(2)   |
| Cl(6) | 70(2)  | 68(2)  | 55(2)  | 4(2)    | -3(2)  | 18(2)   |
| C(50) | 55(7)  | 41(6)  | 53(7)  | 12(5)   | 1(6)   | -4(6)   |

---

Table 5. Hydrogen coordinates ( $\times 10^4$ ) and isotropic displacement parameters ( $\text{\AA}^2 \times 10^3$ ) for 19949ds\_sq.

|        | x     | y     | z    | U(eq) |
|--------|-------|-------|------|-------|
| H(2)   | 7783  | 6741  | 3816 | 18    |
| H(5)   | 6374  | 7421  | 2237 | 19    |
| H(7)   | 5721  | 7602  | 1413 | 23    |
| H(8)   | 5103  | 7112  | 722  | 28    |
| H(9)   | 4920  | 5840  | 658  | 29    |
| H(10)  | 5318  | 5066  | 1297 | 23    |
| H(12)  | 5973  | 4882  | 2108 | 17    |
| H(14)  | 6567  | 7125  | 3958 | 35    |
| H(15A) | 7461  | 7661  | 4449 | 51    |
| H(15B) | 7614  | 6935  | 4763 | 51    |
| H(15C) | 6902  | 7391  | 4809 | 51    |
| H(16A) | 6009  | 6504  | 4551 | 60    |
| H(16B) | 6622  | 5898  | 4592 | 60    |
| H(16C) | 6100  | 5970  | 4103 | 60    |
| H(18)  | 6632  | 2759  | 2408 | 20    |
| H(21)  | 7031  | 83    | 2828 | 18    |
| H(23)  | 7437  | -1164 | 3086 | 23    |
| H(24)  | 8063  | -1912 | 3642 | 28    |
| H(25)  | 8625  | -1432 | 4370 | 30    |
| H(26)  | 8563  | -194  | 4543 | 26    |
| H(28)  | 8140  | 1052  | 4301 | 20    |
| H(30)  | 5553  | 2163  | 2603 | 34    |
| H(31A) | 5467  | 3061  | 1982 | 52    |
| H(31B) | 5322  | 3673  | 2373 | 52    |
| H(31C) | 4756  | 3034  | 2251 | 52    |
| H(32A) | 5341  | 3338  | 3237 | 61    |
| H(32B) | 5609  | 2550  | 3426 | 61    |
| H(32C) | 4840  | 2640  | 3135 | 61    |
| H(34)  | 9173  | 2722  | 5042 | 21    |
| H(37)  | 10386 | 4670  | 6123 | 20    |

|        |       |      |      |    |
|--------|-------|------|------|----|
| H(39)  | 10974 | 5739 | 6552 | 23 |
| H(40)  | 11096 | 6990 | 6638 | 28 |
| H(41)  | 10453 | 7786 | 6088 | 27 |
| H(42)  | 9628  | 7327 | 5482 | 24 |
| H(44)  | 8984  | 6271 | 5076 | 17 |
| H(46)  | 8710  | 2792 | 5825 | 33 |
| H(47A) | 7692  | 3486 | 5596 | 71 |
| H(47B) | 7498  | 2760 | 5876 | 71 |
| H(47C) | 7344  | 2806 | 5297 | 71 |
| H(48A) | 8029  | 1661 | 5240 | 58 |
| H(48B) | 8254  | 1624 | 5813 | 58 |
| H(48C) | 8852  | 1635 | 5442 | 58 |
| H(49)  | 9740  | 4118 | 7716 | 44 |
| H(51A) | 3648  | 3997 | 5600 | 62 |
| H(51B) | 4392  | 4191 | 5898 | 62 |
| H(51C) | 4267  | 3400 | 5661 | 62 |
| H(52)  | 4180  | 4482 | 4929 | 51 |
| H(53A) | 5300  | 4607 | 4605 | 67 |
| H(53B) | 5149  | 3780 | 4433 | 67 |
| H(54A) | 6281  | 3572 | 4495 | 92 |
| H(54B) | 6333  | 3768 | 5061 | 92 |
| H(54C) | 6431  | 4395 | 4670 | 92 |
| H(50)  | 8000  | 9050 | 6105 | 60 |

---

Table 6. Torsion angles [°] for 19949ds\_sq.

---

|                         |           |
|-------------------------|-----------|
| I(3)-O(1)-C(1)-O(2)     | 0.9(10)   |
| I(3)-O(1)-C(1)-C(2)     | 178.4(6)  |
| C(3)-N(1)-C(2)-C(1)     | -160.6(7) |
| I(1)-N(1)-C(2)-C(1)     | 10.4(9)   |
| C(3)-N(1)-C(2)-C(14)    | 76.5(9)   |
| I(1)-N(1)-C(2)-C(14)    | -112.5(7) |
| O(2)-C(1)-C(2)-N(1)     | -15.7(11) |
| O(1)-C(1)-C(2)-N(1)     | 166.8(7)  |
| O(2)-C(1)-C(2)-C(14)    | 107.9(9)  |
| O(1)-C(1)-C(2)-C(14)    | -69.6(9)  |
| C(2)-N(1)-C(3)-O(3)     | 0.4(12)   |
| I(1)-N(1)-C(3)-O(3)     | -171.3(7) |
| C(2)-N(1)-C(3)-C(4)     | -177.7(6) |
| I(1)-N(1)-C(3)-C(4)     | 10.6(8)   |
| O(3)-C(3)-C(4)-C(5)     | -5.6(12)  |
| N(1)-C(3)-C(4)-C(5)     | 172.5(7)  |
| O(3)-C(3)-C(4)-C(13)    | 176.7(8)  |
| N(1)-C(3)-C(4)-C(13)    | -5.2(10)  |
| C(13)-C(4)-C(5)-C(6)    | -0.2(11)  |
| C(3)-C(4)-C(5)-C(6)     | -177.9(7) |
| C(4)-C(5)-C(6)-C(11)    | -0.4(11)  |
| C(4)-C(5)-C(6)-C(7)     | 179.9(7)  |
| C(5)-C(6)-C(7)-C(8)     | 179.8(7)  |
| C(11)-C(6)-C(7)-C(8)    | 0.1(12)   |
| C(6)-C(7)-C(8)-C(9)     | -0.3(13)  |
| C(7)-C(8)-C(9)-C(10)    | 1.1(14)   |
| C(8)-C(9)-C(10)-C(11)   | -1.7(13)  |
| C(9)-C(10)-C(11)-C(6)   | 1.5(12)   |
| C(9)-C(10)-C(11)-C(12)  | -179.4(8) |
| C(5)-C(6)-C(11)-C(10)   | 179.6(7)  |
| C(7)-C(6)-C(11)-C(10)   | -0.7(11)  |
| C(5)-C(6)-C(11)-C(12)   | 0.5(11)   |
| C(7)-C(6)-C(11)-C(12)   | -179.8(7) |
| C(10)-C(11)-C(12)-C(13) | -179.0(7) |

|                         |           |
|-------------------------|-----------|
| C(6)-C(11)-C(12)-C(13)  | 0.1(11)   |
| C(11)-C(12)-C(13)-C(4)  | -0.8(11)  |
| C(11)-C(12)-C(13)-I(1)  | -179.3(5) |
| C(5)-C(4)-C(13)-C(12)   | 0.8(11)   |
| C(3)-C(4)-C(13)-C(12)   | 178.6(7)  |
| C(5)-C(4)-C(13)-I(1)    | 179.5(5)  |
| C(3)-C(4)-C(13)-I(1)    | -2.7(9)   |
| N(1)-C(2)-C(14)-C(16)   | 76.4(9)   |
| C(1)-C(2)-C(14)-C(16)   | -47.2(9)  |
| N(1)-C(2)-C(14)-C(15)   | -158.6(7) |
| C(1)-C(2)-C(14)-C(15)   | 77.8(9)   |
| I(1)-O(4)-C(17)-O(5)    | -1.6(10)  |
| I(1)-O(4)-C(17)-C(18)   | 178.5(5)  |
| C(19)-N(2)-C(18)-C(17)  | -164.7(7) |
| I(2)-N(2)-C(18)-C(17)   | 6.6(9)    |
| C(19)-N(2)-C(18)-C(30)  | 73.6(9)   |
| I(2)-N(2)-C(18)-C(30)   | -115.1(7) |
| O(5)-C(17)-C(18)-N(2)   | -13.0(11) |
| O(4)-C(17)-C(18)-N(2)   | 167.0(7)  |
| O(5)-C(17)-C(18)-C(30)  | 109.2(9)  |
| O(4)-C(17)-C(18)-C(30)  | -70.8(9)  |
| C(18)-N(2)-C(19)-O(6)   | 0.2(12)   |
| I(2)-N(2)-C(19)-O(6)    | -171.8(6) |
| C(18)-N(2)-C(19)-C(20)  | -178.9(6) |
| I(2)-N(2)-C(19)-C(20)   | 9.1(8)    |
| O(6)-C(19)-C(20)-C(21)  | -5.4(12)  |
| N(2)-C(19)-C(20)-C(21)  | 173.7(7)  |
| O(6)-C(19)-C(20)-C(29)  | 173.4(7)  |
| N(2)-C(19)-C(20)-C(29)  | -7.4(10)  |
| C(29)-C(20)-C(21)-C(22) | -0.3(11)  |
| C(19)-C(20)-C(21)-C(22) | 178.5(7)  |
| C(20)-C(21)-C(22)-C(27) | -1.3(11)  |
| C(20)-C(21)-C(22)-C(23) | -179.6(7) |
| C(21)-C(22)-C(23)-C(24) | 178.3(8)  |
| C(27)-C(22)-C(23)-C(24) | 0.0(11)   |
| C(22)-C(23)-C(24)-C(25) | 0.4(13)   |



|                         |           |
|-------------------------|-----------|
| C(23)-C(24)-C(25)-C(26) | -0.1(14)  |
| C(24)-C(25)-C(26)-C(27) | -0.5(14)  |
| C(21)-C(22)-C(27)-C(28) | 2.0(11)   |
| C(23)-C(22)-C(27)-C(28) | -179.7(7) |
| C(21)-C(22)-C(27)-C(26) | -178.9(7) |
| C(23)-C(22)-C(27)-C(26) | -0.6(11)  |
| C(25)-C(26)-C(27)-C(28) | 179.9(8)  |
| C(25)-C(26)-C(27)-C(22) | 0.9(12)   |
| C(22)-C(27)-C(28)-C(29) | -1.1(11)  |
| C(26)-C(27)-C(28)-C(29) | 179.8(7)  |
| C(27)-C(28)-C(29)-C(20) | -0.5(11)  |
| C(27)-C(28)-C(29)-I(2)  | 179.8(5)  |
| C(21)-C(20)-C(29)-C(28) | 1.2(11)   |
| C(19)-C(20)-C(29)-C(28) | -177.6(7) |
| C(21)-C(20)-C(29)-I(2)  | -179.1(5) |
| C(19)-C(20)-C(29)-I(2)  | 2.1(8)    |
| N(2)-C(18)-C(30)-C(32)  | 67.7(9)   |
| C(17)-C(18)-C(30)-C(32) | -54.1(9)  |
| N(2)-C(18)-C(30)-C(31)  | -167.2(7) |
| C(17)-C(18)-C(30)-C(31) | 71.0(9)   |
| I(2)-O(7)-C(33)-O(8)    | 5.3(10)   |
| I(2)-O(7)-C(33)-C(34)   | -176.7(6) |
| C(35)-N(3)-C(34)-C(33)  | -162.3(7) |
| I(3)-N(3)-C(34)-C(33)   | 8.7(9)    |
| C(35)-N(3)-C(34)-C(46)  | 73.3(9)   |
| I(3)-N(3)-C(34)-C(46)   | -115.6(7) |
| O(8)-C(33)-C(34)-N(3)   | -14.6(11) |
| O(7)-C(33)-C(34)-N(3)   | 167.3(7)  |
| O(8)-C(33)-C(34)-C(46)  | 109.4(9)  |
| O(7)-C(33)-C(34)-C(46)  | -68.7(10) |
| C(34)-N(3)-C(35)-O(9)   | 1.5(12)   |
| I(3)-N(3)-C(35)-O(9)    | -170.2(7) |
| C(34)-N(3)-C(35)-C(36)  | -178.3(7) |
| I(3)-N(3)-C(35)-C(36)   | 10.0(9)   |
| O(9)-C(35)-C(36)-C(37)  | -7.6(13)  |
| N(3)-C(35)-C(36)-C(37)  | 172.2(7)  |

|                             |           |
|-----------------------------|-----------|
| O(9)-C(35)-C(36)-C(45)      | 172.9(8)  |
| N(3)-C(35)-C(36)-C(45)      | -7.3(10)  |
| C(45)-C(36)-C(37)-C(38)     | -1.1(11)  |
| C(35)-C(36)-C(37)-C(38)     | 179.5(7)  |
| C(36)-C(37)-C(38)-C(39)     | 178.0(7)  |
| C(36)-C(37)-C(38)-C(43)     | -2.6(11)  |
| C(37)-C(38)-C(39)-C(40)     | -179.7(7) |
| C(43)-C(38)-C(39)-C(40)     | 0.9(11)   |
| C(38)-C(39)-C(40)-C(41)     | -2.2(13)  |
| C(39)-C(40)-C(41)-C(42)     | 2.1(13)   |
| C(40)-C(41)-C(42)-C(43)     | -0.6(12)  |
| C(41)-C(42)-C(43)-C(44)     | 177.0(7)  |
| C(41)-C(42)-C(43)-C(38)     | -0.6(12)  |
| C(37)-C(38)-C(43)-C(42)     | -178.9(7) |
| C(39)-C(38)-C(43)-C(42)     | 0.5(11)   |
| C(37)-C(38)-C(43)-C(44)     | 3.4(10)   |
| C(39)-C(38)-C(43)-C(44)     | -177.2(7) |
| C(42)-C(43)-C(44)-C(45)     | -178.1(7) |
| C(38)-C(43)-C(44)-C(45)     | -0.5(10)  |
| C(43)-C(44)-C(45)-C(36)     | -3.3(11)  |
| C(43)-C(44)-C(45)-I(3)      | 179.8(5)  |
| C(37)-C(36)-C(45)-C(44)     | 4.2(11)   |
| C(35)-C(36)-C(45)-C(44)     | -176.3(7) |
| C(37)-C(36)-C(45)-I(3)      | -178.5(5) |
| C(35)-C(36)-C(45)-I(3)      | 1.0(8)    |
| N(3)-C(34)-C(46)-C(47)      | 70.5(9)   |
| C(33)-C(34)-C(46)-C(47)     | -53.3(9)  |
| N(3)-C(34)-C(46)-C(48)      | -164.3(7) |
| C(33)-C(34)-C(46)-C(48)     | 71.8(10)  |
| C(117)-C(115)-C(116)-C(118) | 0.0       |
| C(126)-C(115)-C(116)-C(118) | -142.6    |
| C(117)-C(115)-C(116)-C(120) | 142.6     |
| C(126)-C(115)-C(116)-C(120) | 0.0       |
| C(126)-C(115)-C(117)-C(125) | 0.0       |
| C(116)-C(115)-C(117)-C(125) | -138.2    |
| C(126)-C(115)-C(117)-C(149) | 138.2     |

|                             |        |
|-----------------------------|--------|
| C(116)-C(115)-C(117)-C(149) | 0.0    |
| C(115)-C(116)-C(118)-C(147) | 0.0    |
| C(120)-C(116)-C(118)-C(147) | -138.2 |
| C(115)-C(116)-C(118)-C(119) | 138.2  |
| C(120)-C(116)-C(118)-C(119) | 0.0    |
| C(116)-C(118)-C(119)-C(122) | 0.0    |
| C(147)-C(118)-C(119)-C(122) | 142.6  |
| C(116)-C(118)-C(119)-C(152) | -142.6 |
| C(147)-C(118)-C(119)-C(152) | 0.0    |
| C(118)-C(116)-C(120)-C(121) | 0.0    |
| C(115)-C(116)-C(120)-C(121) | -142.6 |
| C(118)-C(116)-C(120)-C(127) | 142.6  |
| C(115)-C(116)-C(120)-C(127) | 0.0    |
| C(127)-C(120)-C(121)-C(122) | -138.2 |
| C(116)-C(120)-C(121)-C(122) | 0.0    |
| C(127)-C(120)-C(121)-C(168) | 0.0    |
| C(116)-C(120)-C(121)-C(168) | 138.2  |
| C(152)-C(119)-C(122)-C(121) | 138.2  |
| C(118)-C(119)-C(122)-C(121) | 0.0    |
| C(152)-C(119)-C(122)-C(173) | 0.0    |
| C(118)-C(119)-C(122)-C(173) | -138.2 |
| C(120)-C(121)-C(122)-C(119) | 0.0    |
| C(168)-C(121)-C(122)-C(119) | -142.6 |
| C(120)-C(121)-C(122)-C(173) | 142.6  |
| C(168)-C(121)-C(122)-C(173) | 0.0    |
| C(125)-C(123)-C(124)-C(126) | 0.0    |
| C(134)-C(123)-C(124)-C(126) | -142.6 |
| C(125)-C(123)-C(124)-C(128) | 142.6  |
| C(134)-C(123)-C(124)-C(128) | 0.0    |
| C(124)-C(123)-C(125)-C(117) | 0.0    |
| C(134)-C(123)-C(125)-C(117) | 138.2  |
| C(124)-C(123)-C(125)-C(133) | -138.2 |
| C(134)-C(123)-C(125)-C(133) | 0.0    |
| C(115)-C(117)-C(125)-C(123) | 0.0    |
| C(149)-C(117)-C(125)-C(123) | -142.6 |
| C(115)-C(117)-C(125)-C(133) | 142.6  |

|                             |        |
|-----------------------------|--------|
| C(149)-C(117)-C(125)-C(133) | 0.0    |
| C(128)-C(124)-C(126)-C(115) | -138.2 |
| C(123)-C(124)-C(126)-C(115) | 0.0    |
| C(128)-C(124)-C(126)-C(127) | 0.0    |
| C(123)-C(124)-C(126)-C(127) | 138.2  |
| C(117)-C(115)-C(126)-C(124) | 0.0    |
| C(116)-C(115)-C(126)-C(124) | 142.6  |
| C(117)-C(115)-C(126)-C(127) | -142.6 |
| C(116)-C(115)-C(126)-C(127) | 0.0    |
| C(121)-C(120)-C(127)-C(130) | 0.0    |
| C(116)-C(120)-C(127)-C(130) | -142.6 |
| C(121)-C(120)-C(127)-C(126) | 142.6  |
| C(116)-C(120)-C(127)-C(126) | 0.0    |
| C(124)-C(126)-C(127)-C(130) | 0.0    |
| C(115)-C(126)-C(127)-C(130) | 142.6  |
| C(124)-C(126)-C(127)-C(120) | -142.6 |
| C(115)-C(126)-C(127)-C(120) | 0.0    |
| C(126)-C(124)-C(128)-C(129) | 0.0    |
| C(123)-C(124)-C(128)-C(129) | -142.6 |
| C(126)-C(124)-C(128)-C(135) | 142.6  |
| C(123)-C(124)-C(128)-C(135) | 0.0    |
| C(135)-C(128)-C(129)-C(130) | -138.2 |
| C(124)-C(128)-C(129)-C(130) | 0.0    |
| C(135)-C(128)-C(129)-C(164) | 0.0    |
| C(124)-C(128)-C(129)-C(164) | 138.2  |
| C(120)-C(127)-C(130)-C(129) | 138.2  |
| C(126)-C(127)-C(130)-C(129) | 0.0    |
| C(120)-C(127)-C(130)-C(169) | 0.0    |
| C(126)-C(127)-C(130)-C(169) | -138.2 |
| C(128)-C(129)-C(130)-C(127) | 0.0    |
| C(164)-C(129)-C(130)-C(127) | -142.6 |
| C(128)-C(129)-C(130)-C(169) | 142.6  |
| C(164)-C(129)-C(130)-C(169) | 0.0    |
| C(133)-C(131)-C(132)-C(134) | 0.0    |
| C(142)-C(131)-C(132)-C(134) | -142.6 |
| C(133)-C(131)-C(132)-C(136) | 142.6  |

|                             |        |
|-----------------------------|--------|
| C(142)-C(131)-C(132)-C(136) | 0.0    |
| C(132)-C(131)-C(133)-C(125) | 0.0    |
| C(142)-C(131)-C(133)-C(125) | 138.2  |
| C(132)-C(131)-C(133)-C(141) | -138.2 |
| C(142)-C(131)-C(133)-C(141) | 0.0    |
| C(123)-C(125)-C(133)-C(131) | 0.0    |
| C(117)-C(125)-C(133)-C(131) | -142.6 |
| C(123)-C(125)-C(133)-C(141) | 142.6  |
| C(117)-C(125)-C(133)-C(141) | 0.0    |
| C(136)-C(132)-C(134)-C(135) | 0.0    |
| C(131)-C(132)-C(134)-C(135) | 138.2  |
| C(136)-C(132)-C(134)-C(123) | -138.2 |
| C(131)-C(132)-C(134)-C(123) | 0.0    |
| C(125)-C(123)-C(134)-C(132) | 0.0    |
| C(124)-C(123)-C(134)-C(132) | 142.6  |
| C(125)-C(123)-C(134)-C(135) | -142.6 |
| C(124)-C(123)-C(134)-C(135) | 0.0    |
| C(129)-C(128)-C(135)-C(138) | 0.0    |
| C(124)-C(128)-C(135)-C(138) | -142.6 |
| C(129)-C(128)-C(135)-C(134) | 142.6  |
| C(124)-C(128)-C(135)-C(134) | 0.0    |
| C(132)-C(134)-C(135)-C(138) | 0.0    |
| C(123)-C(134)-C(135)-C(138) | 142.6  |
| C(132)-C(134)-C(135)-C(128) | -142.6 |
| C(123)-C(134)-C(135)-C(128) | 0.0    |
| C(134)-C(132)-C(136)-C(137) | 0.0    |
| C(131)-C(132)-C(136)-C(137) | -142.6 |
| C(134)-C(132)-C(136)-C(143) | 142.6  |
| C(131)-C(132)-C(136)-C(143) | 0.0    |
| C(132)-C(136)-C(137)-C(160) | 138.2  |
| C(143)-C(136)-C(137)-C(160) | 0.0    |
| C(132)-C(136)-C(137)-C(138) | 0.0    |
| C(143)-C(136)-C(137)-C(138) | -138.2 |
| C(128)-C(135)-C(138)-C(165) | 0.0    |
| C(134)-C(135)-C(138)-C(165) | -138.2 |
| C(128)-C(135)-C(138)-C(137) | 138.2  |

|                             |        |
|-----------------------------|--------|
| C(134)-C(135)-C(138)-C(137) | 0.0    |
| C(136)-C(137)-C(138)-C(135) | 0.0    |
| C(160)-C(137)-C(138)-C(135) | -142.6 |
| C(136)-C(137)-C(138)-C(165) | 142.6  |
| C(160)-C(137)-C(138)-C(165) | 0.0    |
| C(141)-C(139)-C(140)-C(142) | 0.0    |
| C(150)-C(139)-C(140)-C(142) | -142.6 |
| C(141)-C(139)-C(140)-C(144) | 142.6  |
| C(150)-C(139)-C(140)-C(144) | 0.0    |
| C(150)-C(139)-C(141)-C(133) | 138.2  |
| C(140)-C(139)-C(141)-C(133) | 0.0    |
| C(150)-C(139)-C(141)-C(149) | 0.0    |
| C(140)-C(139)-C(141)-C(149) | -138.2 |
| C(131)-C(133)-C(141)-C(139) | 0.0    |
| C(125)-C(133)-C(141)-C(139) | -142.6 |
| C(131)-C(133)-C(141)-C(149) | 142.6  |
| C(125)-C(133)-C(141)-C(149) | 0.0    |
| C(144)-C(140)-C(142)-C(143) | 0.0    |
| C(139)-C(140)-C(142)-C(143) | 138.2  |
| C(144)-C(140)-C(142)-C(131) | -138.2 |
| C(139)-C(140)-C(142)-C(131) | 0.0    |
| C(133)-C(131)-C(142)-C(140) | 0.0    |
| C(132)-C(131)-C(142)-C(140) | 142.6  |
| C(133)-C(131)-C(142)-C(143) | -142.6 |
| C(132)-C(131)-C(142)-C(143) | 0.0    |
| C(137)-C(136)-C(143)-C(146) | 0.0    |
| C(132)-C(136)-C(143)-C(146) | -142.6 |
| C(137)-C(136)-C(143)-C(142) | 142.6  |
| C(132)-C(136)-C(143)-C(142) | 0.0    |
| C(140)-C(142)-C(143)-C(146) | 0.0    |
| C(131)-C(142)-C(143)-C(146) | 142.6  |
| C(140)-C(142)-C(143)-C(136) | -142.6 |
| C(131)-C(142)-C(143)-C(136) | 0.0    |
| C(142)-C(140)-C(144)-C(145) | 0.0    |
| C(139)-C(140)-C(144)-C(145) | -142.6 |
| C(142)-C(140)-C(144)-C(151) | 142.6  |

|                             |        |
|-----------------------------|--------|
| C(139)-C(140)-C(144)-C(151) | 0.0    |
| C(151)-C(144)-C(145)-C(146) | -138.2 |
| C(140)-C(144)-C(145)-C(146) | 0.0    |
| C(151)-C(144)-C(145)-C(156) | 0.0    |
| C(140)-C(144)-C(145)-C(156) | 138.2  |
| C(136)-C(143)-C(146)-C(145) | 138.2  |
| C(142)-C(143)-C(146)-C(145) | 0.0    |
| C(136)-C(143)-C(146)-C(161) | 0.0    |
| C(142)-C(143)-C(146)-C(161) | -138.2 |
| C(144)-C(145)-C(146)-C(143) | 0.0    |
| C(156)-C(145)-C(146)-C(143) | -142.6 |
| C(144)-C(145)-C(146)-C(161) | 142.6  |
| C(156)-C(145)-C(146)-C(161) | 0.0    |
| C(116)-C(118)-C(147)-C(149) | 0.0    |
| C(119)-C(118)-C(147)-C(149) | -142.6 |
| C(116)-C(118)-C(147)-C(148) | 142.6  |
| C(119)-C(118)-C(147)-C(148) | 0.0    |
| C(149)-C(147)-C(148)-C(150) | 0.0    |
| C(118)-C(147)-C(148)-C(150) | -142.6 |
| C(149)-C(147)-C(148)-C(152) | 142.6  |
| C(118)-C(147)-C(148)-C(152) | 0.0    |
| C(118)-C(147)-C(149)-C(117) | 0.0    |
| C(148)-C(147)-C(149)-C(117) | -138.2 |
| C(118)-C(147)-C(149)-C(141) | 138.2  |
| C(148)-C(147)-C(149)-C(141) | 0.0    |
| C(115)-C(117)-C(149)-C(147) | 0.0    |
| C(125)-C(117)-C(149)-C(147) | 142.6  |
| C(115)-C(117)-C(149)-C(141) | -142.6 |
| C(125)-C(117)-C(149)-C(141) | 0.0    |
| C(139)-C(141)-C(149)-C(147) | 0.0    |
| C(133)-C(141)-C(149)-C(147) | -142.6 |
| C(139)-C(141)-C(149)-C(117) | 142.6  |
| C(133)-C(141)-C(149)-C(117) | 0.0    |
| C(152)-C(148)-C(150)-C(151) | 0.0    |
| C(147)-C(148)-C(150)-C(151) | 138.2  |
| C(152)-C(148)-C(150)-C(139) | -138.2 |

|                             |        |
|-----------------------------|--------|
| C(147)-C(148)-C(150)-C(139) | 0.0    |
| C(141)-C(139)-C(150)-C(148) | 0.0    |
| C(140)-C(139)-C(150)-C(148) | 142.6  |
| C(141)-C(139)-C(150)-C(151) | -142.6 |
| C(140)-C(139)-C(150)-C(151) | 0.0    |
| C(148)-C(150)-C(151)-C(154) | 0.0    |
| C(139)-C(150)-C(151)-C(154) | 142.6  |
| C(148)-C(150)-C(151)-C(144) | -142.6 |
| C(139)-C(150)-C(151)-C(144) | 0.0    |
| C(145)-C(144)-C(151)-C(154) | 0.0    |
| C(140)-C(144)-C(151)-C(154) | -142.6 |
| C(145)-C(144)-C(151)-C(150) | 142.6  |
| C(140)-C(144)-C(151)-C(150) | 0.0    |
| C(122)-C(119)-C(152)-C(153) | 0.0    |
| C(118)-C(119)-C(152)-C(153) | 142.6  |
| C(122)-C(119)-C(152)-C(148) | -142.6 |
| C(118)-C(119)-C(152)-C(148) | 0.0    |
| C(150)-C(148)-C(152)-C(153) | 0.0    |
| C(147)-C(148)-C(152)-C(153) | -142.6 |
| C(150)-C(148)-C(152)-C(119) | 142.6  |
| C(147)-C(148)-C(152)-C(119) | 0.0    |
| C(119)-C(152)-C(153)-C(154) | -138.2 |
| C(148)-C(152)-C(153)-C(154) | 0.0    |
| C(119)-C(152)-C(153)-C(172) | 0.0    |
| C(148)-C(152)-C(153)-C(172) | 138.2  |
| C(150)-C(151)-C(154)-C(153) | 0.0    |
| C(144)-C(151)-C(154)-C(153) | 138.2  |
| C(150)-C(151)-C(154)-C(157) | -138.2 |
| C(144)-C(151)-C(154)-C(157) | 0.0    |
| C(152)-C(153)-C(154)-C(151) | 0.0    |
| C(172)-C(153)-C(154)-C(151) | -142.6 |
| C(152)-C(153)-C(154)-C(157) | 142.6  |
| C(172)-C(153)-C(154)-C(157) | 0.0    |
| C(144)-C(145)-C(156)-C(157) | 0.0    |
| C(146)-C(145)-C(156)-C(157) | 142.6  |
| C(144)-C(145)-C(156)-C(155) | -142.6 |



|                             |        |
|-----------------------------|--------|
| C(146)-C(145)-C(156)-C(155) | 0.0    |
| C(158)-C(155)-C(156)-C(157) | 0.0    |
| C(161)-C(155)-C(156)-C(157) | -142.6 |
| C(158)-C(155)-C(156)-C(145) | 142.6  |
| C(161)-C(155)-C(156)-C(145) | 0.0    |
| C(145)-C(156)-C(157)-C(171) | -138.2 |
| C(155)-C(156)-C(157)-C(171) | 0.0    |
| C(145)-C(156)-C(157)-C(154) | 0.0    |
| C(155)-C(156)-C(157)-C(154) | 138.2  |
| C(151)-C(154)-C(157)-C(156) | 0.0    |
| C(153)-C(154)-C(157)-C(156) | -142.6 |
| C(151)-C(154)-C(157)-C(171) | 142.6  |
| C(153)-C(154)-C(157)-C(171) | 0.0    |
| C(161)-C(155)-C(158)-C(174) | 138.2  |
| C(156)-C(155)-C(158)-C(174) | 0.0    |
| C(161)-C(155)-C(158)-C(162) | 0.0    |
| C(156)-C(155)-C(158)-C(162) | -138.2 |
| C(136)-C(137)-C(160)-C(161) | 0.0    |
| C(138)-C(137)-C(160)-C(161) | 142.6  |
| C(136)-C(137)-C(160)-C(159) | -142.6 |
| C(138)-C(137)-C(160)-C(159) | 0.0    |
| C(162)-C(159)-C(160)-C(161) | 0.0    |
| C(165)-C(159)-C(160)-C(161) | -142.6 |
| C(162)-C(159)-C(160)-C(137) | 142.6  |
| C(165)-C(159)-C(160)-C(137) | 0.0    |
| C(137)-C(160)-C(161)-C(155) | -138.2 |
| C(159)-C(160)-C(161)-C(155) | 0.0    |
| C(137)-C(160)-C(161)-C(146) | 0.0    |
| C(159)-C(160)-C(161)-C(146) | 138.2  |
| C(158)-C(155)-C(161)-C(160) | 0.0    |
| C(156)-C(155)-C(161)-C(160) | 142.6  |
| C(158)-C(155)-C(161)-C(146) | -142.6 |
| C(156)-C(155)-C(161)-C(146) | 0.0    |
| C(143)-C(146)-C(161)-C(160) | 0.0    |
| C(145)-C(146)-C(161)-C(160) | -142.6 |
| C(143)-C(146)-C(161)-C(155) | 142.6  |

|                             |        |
|-----------------------------|--------|
| C(145)-C(146)-C(161)-C(155) | 0.0    |
| C(165)-C(159)-C(162)-C(166) | 0.0    |
| C(160)-C(159)-C(162)-C(166) | -138.2 |
| C(165)-C(159)-C(162)-C(158) | 138.2  |
| C(160)-C(159)-C(162)-C(158) | 0.0    |
| C(155)-C(158)-C(162)-C(159) | 0.0    |
| C(174)-C(158)-C(162)-C(159) | -142.6 |
| C(155)-C(158)-C(162)-C(166) | 142.6  |
| C(174)-C(158)-C(162)-C(166) | 0.0    |
| C(128)-C(129)-C(164)-C(165) | 0.0    |
| C(130)-C(129)-C(164)-C(165) | 142.6  |
| C(128)-C(129)-C(164)-C(163) | -142.6 |
| C(130)-C(129)-C(164)-C(163) | 0.0    |
| C(166)-C(163)-C(164)-C(165) | 0.0    |
| C(169)-C(163)-C(164)-C(165) | -142.6 |
| C(166)-C(163)-C(164)-C(129) | 142.6  |
| C(169)-C(163)-C(164)-C(129) | 0.0    |
| C(129)-C(164)-C(165)-C(138) | 0.0    |
| C(163)-C(164)-C(165)-C(138) | 138.2  |
| C(129)-C(164)-C(165)-C(159) | -138.2 |
| C(163)-C(164)-C(165)-C(159) | 0.0    |
| C(135)-C(138)-C(165)-C(164) | 0.0    |
| C(137)-C(138)-C(165)-C(164) | -142.6 |
| C(135)-C(138)-C(165)-C(159) | 142.6  |
| C(137)-C(138)-C(165)-C(159) | 0.0    |
| C(162)-C(159)-C(165)-C(164) | 0.0    |
| C(160)-C(159)-C(165)-C(164) | 142.6  |
| C(162)-C(159)-C(165)-C(138) | -142.6 |
| C(160)-C(159)-C(165)-C(138) | 0.0    |
| C(169)-C(163)-C(166)-C(162) | 138.2  |
| C(164)-C(163)-C(166)-C(162) | 0.0    |
| C(169)-C(163)-C(166)-C(170) | 0.0    |
| C(164)-C(163)-C(166)-C(170) | -138.2 |
| C(159)-C(162)-C(166)-C(163) | 0.0    |
| C(158)-C(162)-C(166)-C(163) | -142.6 |
| C(159)-C(162)-C(166)-C(170) | 142.6  |

|                             |        |
|-----------------------------|--------|
| C(158)-C(162)-C(166)-C(170) | 0.0    |
| C(120)-C(121)-C(168)-C(169) | 0.0    |
| C(122)-C(121)-C(168)-C(169) | 142.6  |
| C(120)-C(121)-C(168)-C(167) | -142.6 |
| C(122)-C(121)-C(168)-C(167) | 0.0    |
| C(170)-C(167)-C(168)-C(169) | 0.0    |
| C(173)-C(167)-C(168)-C(169) | -142.6 |
| C(170)-C(167)-C(168)-C(121) | 142.6  |
| C(173)-C(167)-C(168)-C(121) | 0.0    |
| C(121)-C(168)-C(169)-C(163) | -138.2 |
| C(167)-C(168)-C(169)-C(163) | 0.0    |
| C(121)-C(168)-C(169)-C(130) | 0.0    |
| C(167)-C(168)-C(169)-C(130) | 138.2  |
| C(166)-C(163)-C(169)-C(168) | 0.0    |
| C(164)-C(163)-C(169)-C(168) | 142.6  |
| C(166)-C(163)-C(169)-C(130) | -142.6 |
| C(164)-C(163)-C(169)-C(130) | 0.0    |
| C(127)-C(130)-C(169)-C(168) | 0.0    |
| C(129)-C(130)-C(169)-C(168) | -142.6 |
| C(127)-C(130)-C(169)-C(163) | 142.6  |
| C(129)-C(130)-C(169)-C(163) | 0.0    |
| C(173)-C(167)-C(170)-C(174) | 0.0    |
| C(168)-C(167)-C(170)-C(174) | -138.2 |
| C(173)-C(167)-C(170)-C(166) | 138.2  |
| C(168)-C(167)-C(170)-C(166) | 0.0    |
| C(163)-C(166)-C(170)-C(167) | 0.0    |
| C(162)-C(166)-C(170)-C(167) | -142.6 |
| C(163)-C(166)-C(170)-C(174) | 142.6  |
| C(162)-C(166)-C(170)-C(174) | 0.0    |
| C(156)-C(157)-C(171)-C(174) | 0.0    |
| C(154)-C(157)-C(171)-C(174) | -142.6 |
| C(156)-C(157)-C(171)-C(172) | 142.6  |
| C(154)-C(157)-C(171)-C(172) | 0.0    |
| C(174)-C(171)-C(172)-C(173) | 0.0    |
| C(157)-C(171)-C(172)-C(173) | -142.6 |
| C(174)-C(171)-C(172)-C(153) | 142.6  |

|                             |        |
|-----------------------------|--------|
| C(157)-C(171)-C(172)-C(153) | 0.0    |
| C(152)-C(153)-C(172)-C(173) | 0.0    |
| C(154)-C(153)-C(172)-C(173) | 142.6  |
| C(152)-C(153)-C(172)-C(171) | -142.6 |
| C(154)-C(153)-C(172)-C(171) | 0.0    |
| C(171)-C(172)-C(173)-C(167) | 0.0    |
| C(153)-C(172)-C(173)-C(167) | -138.2 |
| C(171)-C(172)-C(173)-C(122) | 138.2  |
| C(153)-C(172)-C(173)-C(122) | 0.0    |
| C(170)-C(167)-C(173)-C(172) | 0.0    |
| C(168)-C(167)-C(173)-C(172) | 142.6  |
| C(170)-C(167)-C(173)-C(122) | -142.6 |
| C(168)-C(167)-C(173)-C(122) | 0.0    |
| C(119)-C(122)-C(173)-C(172) | 0.0    |
| C(121)-C(122)-C(173)-C(172) | -142.6 |
| C(119)-C(122)-C(173)-C(167) | 142.6  |
| C(121)-C(122)-C(173)-C(167) | 0.0    |
| C(172)-C(171)-C(174)-C(170) | 0.0    |
| C(157)-C(171)-C(174)-C(170) | 138.2  |
| C(172)-C(171)-C(174)-C(158) | -138.2 |
| C(157)-C(171)-C(174)-C(158) | 0.0    |
| C(167)-C(170)-C(174)-C(171) | 0.0    |
| C(166)-C(170)-C(174)-C(171) | -142.6 |
| C(167)-C(170)-C(174)-C(158) | 142.6  |
| C(166)-C(170)-C(174)-C(158) | 0.0    |
| C(155)-C(158)-C(174)-C(171) | 0.0    |
| C(162)-C(158)-C(174)-C(171) | 142.6  |
| C(155)-C(158)-C(174)-C(170) | -142.6 |
| C(162)-C(158)-C(174)-C(170) | 0.0    |
| C(217)-C(215)-C(216)-C(218) | 0.0    |
| C(226)-C(215)-C(216)-C(218) | -142.6 |
| C(217)-C(215)-C(216)-C(220) | 142.6  |
| C(226)-C(215)-C(216)-C(220) | 0.0    |
| C(226)-C(215)-C(217)-C(249) | 138.2  |
| C(216)-C(215)-C(217)-C(249) | 0.0    |
| C(226)-C(215)-C(217)-C(225) | 0.0    |

|                             |        |
|-----------------------------|--------|
| C(216)-C(215)-C(217)-C(225) | -138.2 |
| C(215)-C(216)-C(218)-C(247) | 0.0    |
| C(220)-C(216)-C(218)-C(247) | -138.2 |
| C(215)-C(216)-C(218)-C(219) | 138.2  |
| C(220)-C(216)-C(218)-C(219) | 0.0    |
| C(216)-C(218)-C(219)-C(222) | 0.0    |
| C(247)-C(218)-C(219)-C(222) | 142.6  |
| C(216)-C(218)-C(219)-C(252) | -142.6 |
| C(247)-C(218)-C(219)-C(252) | 0.0    |
| C(218)-C(216)-C(220)-C(221) | 0.0    |
| C(215)-C(216)-C(220)-C(221) | -142.6 |
| C(218)-C(216)-C(220)-C(227) | 142.6  |
| C(215)-C(216)-C(220)-C(227) | 0.0    |
| C(227)-C(220)-C(221)-C(268) | 0.0    |
| C(216)-C(220)-C(221)-C(268) | 138.2  |
| C(227)-C(220)-C(221)-C(222) | -138.2 |
| C(216)-C(220)-C(221)-C(222) | 0.0    |
| C(252)-C(219)-C(222)-C(273) | 0.0    |
| C(218)-C(219)-C(222)-C(273) | -138.2 |
| C(252)-C(219)-C(222)-C(221) | 138.2  |
| C(218)-C(219)-C(222)-C(221) | 0.0    |
| C(220)-C(221)-C(222)-C(219) | 0.0    |
| C(268)-C(221)-C(222)-C(219) | -142.6 |
| C(220)-C(221)-C(222)-C(273) | 142.6  |
| C(268)-C(221)-C(222)-C(273) | 0.0    |
| C(225)-C(223)-C(224)-C(226) | 0.0    |
| C(234)-C(223)-C(224)-C(226) | -142.6 |
| C(225)-C(223)-C(224)-C(228) | 142.6  |
| C(234)-C(223)-C(224)-C(228) | 0.0    |
| C(234)-C(223)-C(225)-C(233) | 0.0    |
| C(224)-C(223)-C(225)-C(233) | -138.2 |
| C(234)-C(223)-C(225)-C(217) | 138.2  |
| C(224)-C(223)-C(225)-C(217) | 0.0    |
| C(215)-C(217)-C(225)-C(223) | 0.0    |
| C(249)-C(217)-C(225)-C(223) | -142.6 |
| C(215)-C(217)-C(225)-C(233) | 142.6  |

|                             |        |
|-----------------------------|--------|
| C(249)-C(217)-C(225)-C(233) | 0.0    |
| C(223)-C(224)-C(226)-C(215) | 0.0    |
| C(228)-C(224)-C(226)-C(215) | -138.2 |
| C(223)-C(224)-C(226)-C(227) | 138.2  |
| C(228)-C(224)-C(226)-C(227) | 0.0    |
| C(217)-C(215)-C(226)-C(224) | 0.0    |
| C(216)-C(215)-C(226)-C(224) | 142.6  |
| C(217)-C(215)-C(226)-C(227) | -142.6 |
| C(216)-C(215)-C(226)-C(227) | 0.0    |
| C(221)-C(220)-C(227)-C(230) | 0.0    |
| C(216)-C(220)-C(227)-C(230) | -142.6 |
| C(221)-C(220)-C(227)-C(226) | 142.6  |
| C(216)-C(220)-C(227)-C(226) | 0.0    |
| C(224)-C(226)-C(227)-C(230) | 0.0    |
| C(215)-C(226)-C(227)-C(230) | 142.6  |
| C(224)-C(226)-C(227)-C(220) | -142.6 |
| C(215)-C(226)-C(227)-C(220) | 0.0    |
| C(226)-C(224)-C(228)-C(229) | 0.0    |
| C(223)-C(224)-C(228)-C(229) | -142.6 |
| C(226)-C(224)-C(228)-C(235) | 142.6  |
| C(223)-C(224)-C(228)-C(235) | 0.0    |
| C(235)-C(228)-C(229)-C(230) | -138.2 |
| C(224)-C(228)-C(229)-C(230) | 0.0    |
| C(235)-C(228)-C(229)-C(264) | 0.0    |
| C(224)-C(228)-C(229)-C(264) | 138.2  |
| C(220)-C(227)-C(230)-C(229) | 138.2  |
| C(226)-C(227)-C(230)-C(229) | 0.0    |
| C(220)-C(227)-C(230)-C(269) | 0.0    |
| C(226)-C(227)-C(230)-C(269) | -138.2 |
| C(228)-C(229)-C(230)-C(227) | 0.0    |
| C(264)-C(229)-C(230)-C(227) | -142.6 |
| C(228)-C(229)-C(230)-C(269) | 142.6  |
| C(264)-C(229)-C(230)-C(269) | 0.0    |
| C(233)-C(231)-C(232)-C(234) | 0.0    |
| C(242)-C(231)-C(232)-C(234) | -142.6 |
| C(233)-C(231)-C(232)-C(236) | 142.6  |

|                             |        |
|-----------------------------|--------|
| C(242)-C(231)-C(232)-C(236) | 0.0    |
| C(232)-C(231)-C(233)-C(225) | 0.0    |
| C(242)-C(231)-C(233)-C(225) | 138.2  |
| C(232)-C(231)-C(233)-C(241) | -138.2 |
| C(242)-C(231)-C(233)-C(241) | 0.0    |
| C(223)-C(225)-C(233)-C(231) | 0.0    |
| C(217)-C(225)-C(233)-C(231) | -142.6 |
| C(223)-C(225)-C(233)-C(241) | 142.6  |
| C(217)-C(225)-C(233)-C(241) | 0.0    |
| C(231)-C(232)-C(234)-C(223) | 0.0    |
| C(236)-C(232)-C(234)-C(223) | -138.2 |
| C(231)-C(232)-C(234)-C(235) | 138.2  |
| C(236)-C(232)-C(234)-C(235) | 0.0    |
| C(225)-C(223)-C(234)-C(232) | 0.0    |
| C(224)-C(223)-C(234)-C(232) | 142.6  |
| C(225)-C(223)-C(234)-C(235) | -142.6 |
| C(224)-C(223)-C(234)-C(235) | 0.0    |
| C(229)-C(228)-C(235)-C(238) | 0.0    |
| C(224)-C(228)-C(235)-C(238) | -142.6 |
| C(229)-C(228)-C(235)-C(234) | 142.6  |
| C(224)-C(228)-C(235)-C(234) | 0.0    |
| C(232)-C(234)-C(235)-C(238) | 0.0    |
| C(223)-C(234)-C(235)-C(238) | 142.6  |
| C(232)-C(234)-C(235)-C(228) | -142.6 |
| C(223)-C(234)-C(235)-C(228) | 0.0    |
| C(234)-C(232)-C(236)-C(237) | 0.0    |
| C(231)-C(232)-C(236)-C(237) | -142.6 |
| C(234)-C(232)-C(236)-C(243) | 142.6  |
| C(231)-C(232)-C(236)-C(243) | 0.0    |
| C(243)-C(236)-C(237)-C(238) | -138.2 |
| C(232)-C(236)-C(237)-C(238) | 0.0    |
| C(243)-C(236)-C(237)-C(260) | 0.0    |
| C(232)-C(236)-C(237)-C(260) | 138.2  |
| C(228)-C(235)-C(238)-C(237) | 138.2  |
| C(234)-C(235)-C(238)-C(237) | 0.0    |
| C(228)-C(235)-C(238)-C(265) | 0.0    |

|                             |        |
|-----------------------------|--------|
| C(234)-C(235)-C(238)-C(265) | -138.2 |
| C(236)-C(237)-C(238)-C(235) | 0.0    |
| C(260)-C(237)-C(238)-C(235) | -142.6 |
| C(236)-C(237)-C(238)-C(265) | 142.6  |
| C(260)-C(237)-C(238)-C(265) | 0.0    |
| C(241)-C(239)-C(240)-C(242) | 0.0    |
| C(250)-C(239)-C(240)-C(242) | -142.6 |
| C(241)-C(239)-C(240)-C(244) | 142.6  |
| C(250)-C(239)-C(240)-C(244) | 0.0    |
| C(250)-C(239)-C(241)-C(249) | 0.0    |
| C(240)-C(239)-C(241)-C(249) | -138.2 |
| C(250)-C(239)-C(241)-C(233) | 138.2  |
| C(240)-C(239)-C(241)-C(233) | 0.0    |
| C(231)-C(233)-C(241)-C(239) | 0.0    |
| C(225)-C(233)-C(241)-C(239) | -142.6 |
| C(231)-C(233)-C(241)-C(249) | 142.6  |
| C(225)-C(233)-C(241)-C(249) | 0.0    |
| C(244)-C(240)-C(242)-C(243) | 0.0    |
| C(239)-C(240)-C(242)-C(243) | 138.2  |
| C(244)-C(240)-C(242)-C(231) | -138.2 |
| C(239)-C(240)-C(242)-C(231) | 0.0    |
| C(233)-C(231)-C(242)-C(240) | 0.0    |
| C(232)-C(231)-C(242)-C(240) | 142.6  |
| C(233)-C(231)-C(242)-C(243) | -142.6 |
| C(232)-C(231)-C(242)-C(243) | 0.0    |
| C(240)-C(242)-C(243)-C(246) | 0.0    |
| C(231)-C(242)-C(243)-C(246) | 142.6  |
| C(240)-C(242)-C(243)-C(236) | -142.6 |
| C(231)-C(242)-C(243)-C(236) | 0.0    |
| C(237)-C(236)-C(243)-C(246) | 0.0    |
| C(232)-C(236)-C(243)-C(246) | -142.6 |
| C(237)-C(236)-C(243)-C(242) | 142.6  |
| C(232)-C(236)-C(243)-C(242) | 0.0    |
| C(242)-C(240)-C(244)-C(245) | 0.0    |
| C(239)-C(240)-C(244)-C(245) | -142.6 |
| C(242)-C(240)-C(244)-C(251) | 142.6  |



|                             |        |
|-----------------------------|--------|
| C(239)-C(240)-C(244)-C(251) | 0.0    |
| C(240)-C(244)-C(245)-C(256) | 138.2  |
| C(251)-C(244)-C(245)-C(256) | 0.0    |
| C(240)-C(244)-C(245)-C(246) | 0.0    |
| C(251)-C(244)-C(245)-C(246) | -138.2 |
| C(242)-C(243)-C(246)-C(261) | -138.2 |
| C(236)-C(243)-C(246)-C(261) | 0.0    |
| C(242)-C(243)-C(246)-C(245) | 0.0    |
| C(236)-C(243)-C(246)-C(245) | 138.2  |
| C(244)-C(245)-C(246)-C(243) | 0.0    |
| C(256)-C(245)-C(246)-C(243) | -142.6 |
| C(244)-C(245)-C(246)-C(261) | 142.6  |
| C(256)-C(245)-C(246)-C(261) | 0.0    |
| C(216)-C(218)-C(247)-C(249) | 0.0    |
| C(219)-C(218)-C(247)-C(249) | -142.6 |
| C(216)-C(218)-C(247)-C(248) | 142.6  |
| C(219)-C(218)-C(247)-C(248) | 0.0    |
| C(249)-C(247)-C(248)-C(250) | 0.0    |
| C(218)-C(247)-C(248)-C(250) | -142.6 |
| C(249)-C(247)-C(248)-C(252) | 142.6  |
| C(218)-C(247)-C(248)-C(252) | 0.0    |
| C(218)-C(247)-C(249)-C(217) | 0.0    |
| C(248)-C(247)-C(249)-C(217) | -138.2 |
| C(218)-C(247)-C(249)-C(241) | 138.2  |
| C(248)-C(247)-C(249)-C(241) | 0.0    |
| C(215)-C(217)-C(249)-C(247) | 0.0    |
| C(225)-C(217)-C(249)-C(247) | 142.6  |
| C(215)-C(217)-C(249)-C(241) | -142.6 |
| C(225)-C(217)-C(249)-C(241) | 0.0    |
| C(239)-C(241)-C(249)-C(247) | 0.0    |
| C(233)-C(241)-C(249)-C(247) | -142.6 |
| C(239)-C(241)-C(249)-C(217) | 142.6  |
| C(233)-C(241)-C(249)-C(217) | 0.0    |
| C(247)-C(248)-C(250)-C(239) | 0.0    |
| C(252)-C(248)-C(250)-C(239) | -138.2 |
| C(247)-C(248)-C(250)-C(251) | 138.2  |

|                             |        |
|-----------------------------|--------|
| C(252)-C(248)-C(250)-C(251) | 0.0    |
| C(241)-C(239)-C(250)-C(248) | 0.0    |
| C(240)-C(239)-C(250)-C(248) | 142.6  |
| C(241)-C(239)-C(250)-C(251) | -142.6 |
| C(240)-C(239)-C(250)-C(251) | 0.0    |
| C(245)-C(244)-C(251)-C(254) | 0.0    |
| C(240)-C(244)-C(251)-C(254) | -142.6 |
| C(245)-C(244)-C(251)-C(250) | 142.6  |
| C(240)-C(244)-C(251)-C(250) | 0.0    |
| C(248)-C(250)-C(251)-C(254) | 0.0    |
| C(239)-C(250)-C(251)-C(254) | 142.6  |
| C(248)-C(250)-C(251)-C(244) | -142.6 |
| C(239)-C(250)-C(251)-C(244) | 0.0    |
| C(222)-C(219)-C(252)-C(253) | 0.0    |
| C(218)-C(219)-C(252)-C(253) | 142.6  |
| C(222)-C(219)-C(252)-C(248) | -142.6 |
| C(218)-C(219)-C(252)-C(248) | 0.0    |
| C(250)-C(248)-C(252)-C(253) | 0.0    |
| C(247)-C(248)-C(252)-C(253) | -142.6 |
| C(250)-C(248)-C(252)-C(219) | 142.6  |
| C(247)-C(248)-C(252)-C(219) | 0.0    |
| C(219)-C(252)-C(253)-C(272) | 0.0    |
| C(248)-C(252)-C(253)-C(272) | 138.2  |
| C(219)-C(252)-C(253)-C(254) | -138.2 |
| C(248)-C(252)-C(253)-C(254) | 0.0    |
| C(244)-C(251)-C(254)-C(257) | 0.0    |
| C(250)-C(251)-C(254)-C(257) | -138.2 |
| C(244)-C(251)-C(254)-C(253) | 138.2  |
| C(250)-C(251)-C(254)-C(253) | 0.0    |
| C(252)-C(253)-C(254)-C(251) | 0.0    |
| C(272)-C(253)-C(254)-C(251) | -142.6 |
| C(252)-C(253)-C(254)-C(257) | 142.6  |
| C(272)-C(253)-C(254)-C(257) | 0.0    |
| C(258)-C(255)-C(256)-C(257) | 0.0    |
| C(261)-C(255)-C(256)-C(257) | -142.6 |
| C(258)-C(255)-C(256)-C(245) | 142.6  |

|                             |        |
|-----------------------------|--------|
| C(261)-C(255)-C(256)-C(245) | 0.0    |
| C(244)-C(245)-C(256)-C(257) | 0.0    |
| C(246)-C(245)-C(256)-C(257) | 142.6  |
| C(244)-C(245)-C(256)-C(255) | -142.6 |
| C(246)-C(245)-C(256)-C(255) | 0.0    |
| C(255)-C(256)-C(257)-C(254) | 138.2  |
| C(245)-C(256)-C(257)-C(254) | 0.0    |
| C(255)-C(256)-C(257)-C(271) | 0.0    |
| C(245)-C(256)-C(257)-C(271) | -138.2 |
| C(251)-C(254)-C(257)-C(256) | 0.0    |
| C(253)-C(254)-C(257)-C(256) | -142.6 |
| C(251)-C(254)-C(257)-C(271) | 142.6  |
| C(253)-C(254)-C(257)-C(271) | 0.0    |
| C(256)-C(255)-C(258)-C(274) | 0.0    |
| C(261)-C(255)-C(258)-C(274) | 138.2  |
| C(256)-C(255)-C(258)-C(262) | -138.2 |
| C(261)-C(255)-C(258)-C(262) | 0.0    |
| C(262)-C(259)-C(260)-C(261) | 0.0    |
| C(265)-C(259)-C(260)-C(261) | -142.6 |
| C(262)-C(259)-C(260)-C(237) | 142.6  |
| C(265)-C(259)-C(260)-C(237) | 0.0    |
| C(236)-C(237)-C(260)-C(261) | 0.0    |
| C(238)-C(237)-C(260)-C(261) | 142.6  |
| C(236)-C(237)-C(260)-C(259) | -142.6 |
| C(238)-C(237)-C(260)-C(259) | 0.0    |
| C(259)-C(260)-C(261)-C(255) | 0.0    |
| C(237)-C(260)-C(261)-C(255) | -138.2 |
| C(259)-C(260)-C(261)-C(246) | 138.2  |
| C(237)-C(260)-C(261)-C(246) | 0.0    |
| C(258)-C(255)-C(261)-C(260) | 0.0    |
| C(256)-C(255)-C(261)-C(260) | 142.6  |
| C(258)-C(255)-C(261)-C(246) | -142.6 |
| C(256)-C(255)-C(261)-C(246) | 0.0    |
| C(243)-C(246)-C(261)-C(260) | 0.0    |
| C(245)-C(246)-C(261)-C(260) | -142.6 |
| C(243)-C(246)-C(261)-C(255) | 142.6  |

|                             |        |
|-----------------------------|--------|
| C(245)-C(246)-C(261)-C(255) | 0.0    |
| C(265)-C(259)-C(262)-C(266) | 0.0    |
| C(260)-C(259)-C(262)-C(266) | -138.2 |
| C(265)-C(259)-C(262)-C(258) | 138.2  |
| C(260)-C(259)-C(262)-C(258) | 0.0    |
| C(255)-C(258)-C(262)-C(259) | 0.0    |
| C(274)-C(258)-C(262)-C(259) | -142.6 |
| C(255)-C(258)-C(262)-C(266) | 142.6  |
| C(274)-C(258)-C(262)-C(266) | 0.0    |
| C(266)-C(263)-C(264)-C(265) | 0.0    |
| C(269)-C(263)-C(264)-C(265) | -142.6 |
| C(266)-C(263)-C(264)-C(229) | 142.6  |
| C(269)-C(263)-C(264)-C(229) | 0.0    |
| C(228)-C(229)-C(264)-C(265) | 0.0    |
| C(230)-C(229)-C(264)-C(265) | 142.6  |
| C(228)-C(229)-C(264)-C(263) | -142.6 |
| C(230)-C(229)-C(264)-C(263) | 0.0    |
| C(263)-C(264)-C(265)-C(238) | 138.2  |
| C(229)-C(264)-C(265)-C(238) | 0.0    |
| C(263)-C(264)-C(265)-C(259) | 0.0    |
| C(229)-C(264)-C(265)-C(259) | -138.2 |
| C(235)-C(238)-C(265)-C(264) | 0.0    |
| C(237)-C(238)-C(265)-C(264) | -142.6 |
| C(235)-C(238)-C(265)-C(259) | 142.6  |
| C(237)-C(238)-C(265)-C(259) | 0.0    |
| C(262)-C(259)-C(265)-C(264) | 0.0    |
| C(260)-C(259)-C(265)-C(264) | 142.6  |
| C(262)-C(259)-C(265)-C(238) | -142.6 |
| C(260)-C(259)-C(265)-C(238) | 0.0    |
| C(269)-C(263)-C(266)-C(270) | 0.0    |
| C(264)-C(263)-C(266)-C(270) | -138.2 |
| C(269)-C(263)-C(266)-C(262) | 138.2  |
| C(264)-C(263)-C(266)-C(262) | 0.0    |
| C(259)-C(262)-C(266)-C(263) | 0.0    |
| C(258)-C(262)-C(266)-C(263) | -142.6 |
| C(259)-C(262)-C(266)-C(270) | 142.6  |

|                             |        |
|-----------------------------|--------|
| C(258)-C(262)-C(266)-C(270) | 0.0    |
| C(270)-C(267)-C(268)-C(269) | 0.0    |
| C(273)-C(267)-C(268)-C(269) | -142.6 |
| C(270)-C(267)-C(268)-C(221) | 142.6  |
| C(273)-C(267)-C(268)-C(221) | 0.0    |
| C(220)-C(221)-C(268)-C(269) | 0.0    |
| C(222)-C(221)-C(268)-C(269) | 142.6  |
| C(220)-C(221)-C(268)-C(267) | -142.6 |
| C(222)-C(221)-C(268)-C(267) | 0.0    |
| C(267)-C(268)-C(269)-C(263) | 0.0    |
| C(221)-C(268)-C(269)-C(263) | -138.2 |
| C(267)-C(268)-C(269)-C(230) | 138.2  |
| C(221)-C(268)-C(269)-C(230) | 0.0    |
| C(266)-C(263)-C(269)-C(268) | 0.0    |
| C(264)-C(263)-C(269)-C(268) | 142.6  |
| C(266)-C(263)-C(269)-C(230) | -142.6 |
| C(264)-C(263)-C(269)-C(230) | 0.0    |
| C(227)-C(230)-C(269)-C(268) | 0.0    |
| C(229)-C(230)-C(269)-C(268) | -142.6 |
| C(227)-C(230)-C(269)-C(263) | 142.6  |
| C(229)-C(230)-C(269)-C(263) | 0.0    |
| C(268)-C(267)-C(270)-C(266) | 0.0    |
| C(273)-C(267)-C(270)-C(266) | 138.2  |
| C(268)-C(267)-C(270)-C(274) | -138.2 |
| C(273)-C(267)-C(270)-C(274) | 0.0    |
| C(263)-C(266)-C(270)-C(267) | 0.0    |
| C(262)-C(266)-C(270)-C(267) | -142.6 |
| C(263)-C(266)-C(270)-C(274) | 142.6  |
| C(262)-C(266)-C(270)-C(274) | 0.0    |
| C(256)-C(257)-C(271)-C(274) | 0.0    |
| C(254)-C(257)-C(271)-C(274) | -142.6 |
| C(256)-C(257)-C(271)-C(272) | 142.6  |
| C(254)-C(257)-C(271)-C(272) | 0.0    |
| C(274)-C(271)-C(272)-C(273) | 0.0    |
| C(257)-C(271)-C(272)-C(273) | -142.6 |
| C(274)-C(271)-C(272)-C(253) | 142.6  |

|                             |        |
|-----------------------------|--------|
| C(257)-C(271)-C(272)-C(253) | 0.0    |
| C(252)-C(253)-C(272)-C(273) | 0.0    |
| C(254)-C(253)-C(272)-C(273) | 142.6  |
| C(252)-C(253)-C(272)-C(271) | -142.6 |
| C(254)-C(253)-C(272)-C(271) | 0.0    |
| C(271)-C(272)-C(273)-C(267) | 0.0    |
| C(253)-C(272)-C(273)-C(267) | -138.2 |
| C(271)-C(272)-C(273)-C(222) | 138.2  |
| C(253)-C(272)-C(273)-C(222) | 0.0    |
| C(270)-C(267)-C(273)-C(272) | 0.0    |
| C(268)-C(267)-C(273)-C(272) | 142.6  |
| C(270)-C(267)-C(273)-C(222) | -142.6 |
| C(268)-C(267)-C(273)-C(222) | 0.0    |
| C(219)-C(222)-C(273)-C(272) | 0.0    |
| C(221)-C(222)-C(273)-C(272) | -142.6 |
| C(219)-C(222)-C(273)-C(267) | 142.6  |
| C(221)-C(222)-C(273)-C(267) | 0.0    |
| C(272)-C(271)-C(274)-C(258) | -138.2 |
| C(257)-C(271)-C(274)-C(258) | 0.0    |
| C(272)-C(271)-C(274)-C(270) | 0.0    |
| C(257)-C(271)-C(274)-C(270) | 138.2  |
| C(255)-C(258)-C(274)-C(271) | 0.0    |
| C(262)-C(258)-C(274)-C(271) | 142.6  |
| C(255)-C(258)-C(274)-C(270) | -142.6 |
| C(262)-C(258)-C(274)-C(270) | 0.0    |
| C(267)-C(270)-C(274)-C(271) | 0.0    |
| C(266)-C(270)-C(274)-C(271) | -142.6 |
| C(267)-C(270)-C(274)-C(258) | 142.6  |
| C(266)-C(270)-C(274)-C(258) | 0.0    |
| C(57)-C(55)-C(56)-C(58)     | 0.0    |
| C(66)-C(55)-C(56)-C(58)     | -142.6 |
| C(57)-C(55)-C(56)-C(60)     | 142.6  |
| C(66)-C(55)-C(56)-C(60)     | 0.0    |
| C(56)-C(55)-C(57)-C(89)     | 0.0    |
| C(66)-C(55)-C(57)-C(89)     | 138.2  |
| C(56)-C(55)-C(57)-C(65)     | -138.2 |

|                           |        |
|---------------------------|--------|
| C(66)-C(55)-C(57)-C(65)   | 0.0    |
| C(55)-C(56)-C(58)-C(87)   | 0.0    |
| C(60)-C(56)-C(58)-C(87)   | -138.2 |
| C(55)-C(56)-C(58)-C(59)   | 138.2  |
| C(60)-C(56)-C(58)-C(59)   | 0.0    |
| C(56)-C(58)-C(59)-C(62)   | 0.0    |
| C(87)-C(58)-C(59)-C(62)   | 142.6  |
| C(56)-C(58)-C(59)-C(92)   | -142.6 |
| C(87)-C(58)-C(59)-C(92)   | 0.0    |
| C(58)-C(56)-C(60)-C(61)   | 0.0    |
| C(55)-C(56)-C(60)-C(61)   | -142.6 |
| C(58)-C(56)-C(60)-C(67)   | 142.6  |
| C(55)-C(56)-C(60)-C(67)   | 0.0    |
| C(56)-C(60)-C(61)-C(108)  | 138.2  |
| C(67)-C(60)-C(61)-C(108)  | 0.0    |
| C(56)-C(60)-C(61)-C(62)   | 0.0    |
| C(67)-C(60)-C(61)-C(62)   | -138.2 |
| C(58)-C(59)-C(62)-C(113)  | -138.2 |
| C(92)-C(59)-C(62)-C(113)  | 0.0    |
| C(58)-C(59)-C(62)-C(61)   | 0.0    |
| C(92)-C(59)-C(62)-C(61)   | 138.2  |
| C(60)-C(61)-C(62)-C(59)   | 0.0    |
| C(108)-C(61)-C(62)-C(59)  | -142.6 |
| C(60)-C(61)-C(62)-C(113)  | 142.6  |
| C(108)-C(61)-C(62)-C(113) | 0.0    |
| C(65)-C(63)-C(64)-C(66)   | 0.0    |
| C(74)-C(63)-C(64)-C(66)   | -142.6 |
| C(65)-C(63)-C(64)-C(68)   | 142.6  |
| C(74)-C(63)-C(64)-C(68)   | 0.0    |
| C(74)-C(63)-C(65)-C(57)   | 138.2  |
| C(64)-C(63)-C(65)-C(57)   | 0.0    |
| C(74)-C(63)-C(65)-C(73)   | 0.0    |
| C(64)-C(63)-C(65)-C(73)   | -138.2 |
| C(55)-C(57)-C(65)-C(63)   | 0.0    |
| C(89)-C(57)-C(65)-C(63)   | -142.6 |
| C(55)-C(57)-C(65)-C(73)   | 142.6  |

|                           |        |
|---------------------------|--------|
| C(89)-C(57)-C(65)-C(73)   | 0.0    |
| C(68)-C(64)-C(66)-C(67)   | 0.0    |
| C(63)-C(64)-C(66)-C(67)   | 138.2  |
| C(68)-C(64)-C(66)-C(55)   | -138.2 |
| C(63)-C(64)-C(66)-C(55)   | 0.0    |
| C(57)-C(55)-C(66)-C(64)   | 0.0    |
| C(56)-C(55)-C(66)-C(64)   | 142.6  |
| C(57)-C(55)-C(66)-C(67)   | -142.6 |
| C(56)-C(55)-C(66)-C(67)   | 0.0    |
| C(64)-C(66)-C(67)-C(70)   | 0.0    |
| C(55)-C(66)-C(67)-C(70)   | 142.6  |
| C(64)-C(66)-C(67)-C(60)   | -142.6 |
| C(55)-C(66)-C(67)-C(60)   | 0.0    |
| C(61)-C(60)-C(67)-C(70)   | 0.0    |
| C(56)-C(60)-C(67)-C(70)   | -142.6 |
| C(61)-C(60)-C(67)-C(66)   | 142.6  |
| C(56)-C(60)-C(67)-C(66)   | 0.0    |
| C(66)-C(64)-C(68)-C(69)   | 0.0    |
| C(63)-C(64)-C(68)-C(69)   | -142.6 |
| C(66)-C(64)-C(68)-C(75)   | 142.6  |
| C(63)-C(64)-C(68)-C(75)   | 0.0    |
| C(75)-C(68)-C(69)-C(70)   | -138.2 |
| C(64)-C(68)-C(69)-C(70)   | 0.0    |
| C(75)-C(68)-C(69)-C(104)  | 0.0    |
| C(64)-C(68)-C(69)-C(104)  | 138.2  |
| C(66)-C(67)-C(70)-C(69)   | 0.0    |
| C(60)-C(67)-C(70)-C(69)   | 138.2  |
| C(66)-C(67)-C(70)-C(109)  | -138.2 |
| C(60)-C(67)-C(70)-C(109)  | 0.0    |
| C(68)-C(69)-C(70)-C(67)   | 0.0    |
| C(104)-C(69)-C(70)-C(67)  | -142.6 |
| C(68)-C(69)-C(70)-C(109)  | 142.6  |
| C(104)-C(69)-C(70)-C(109) | 0.0    |
| C(73)-C(71)-C(72)-C(74)   | 0.0    |
| C(82)-C(71)-C(72)-C(74)   | -142.6 |
| C(73)-C(71)-C(72)-C(76)   | 142.6  |



|                          |        |
|--------------------------|--------|
| C(82)-C(71)-C(72)-C(76)  | 0.0    |
| C(72)-C(71)-C(73)-C(65)  | 0.0    |
| C(82)-C(71)-C(73)-C(65)  | 138.2  |
| C(72)-C(71)-C(73)-C(81)  | -138.2 |
| C(82)-C(71)-C(73)-C(81)  | 0.0    |
| C(63)-C(65)-C(73)-C(71)  | 0.0    |
| C(57)-C(65)-C(73)-C(71)  | -142.6 |
| C(63)-C(65)-C(73)-C(81)  | 142.6  |
| C(57)-C(65)-C(73)-C(81)  | 0.0    |
| C(76)-C(72)-C(74)-C(75)  | 0.0    |
| C(71)-C(72)-C(74)-C(75)  | 138.2  |
| C(76)-C(72)-C(74)-C(63)  | -138.2 |
| C(71)-C(72)-C(74)-C(63)  | 0.0    |
| C(65)-C(63)-C(74)-C(72)  | 0.0    |
| C(64)-C(63)-C(74)-C(72)  | 142.6  |
| C(65)-C(63)-C(74)-C(75)  | -142.6 |
| C(64)-C(63)-C(74)-C(75)  | 0.0    |
| C(69)-C(68)-C(75)-C(78)  | 0.0    |
| C(64)-C(68)-C(75)-C(78)  | -142.6 |
| C(69)-C(68)-C(75)-C(74)  | 142.6  |
| C(64)-C(68)-C(75)-C(74)  | 0.0    |
| C(72)-C(74)-C(75)-C(78)  | 0.0    |
| C(63)-C(74)-C(75)-C(78)  | 142.6  |
| C(72)-C(74)-C(75)-C(68)  | -142.6 |
| C(63)-C(74)-C(75)-C(68)  | 0.0    |
| C(74)-C(72)-C(76)-C(77)  | 0.0    |
| C(71)-C(72)-C(76)-C(77)  | -142.6 |
| C(74)-C(72)-C(76)-C(83)  | 142.6  |
| C(71)-C(72)-C(76)-C(83)  | 0.0    |
| C(83)-C(76)-C(77)-C(78)  | -138.2 |
| C(72)-C(76)-C(77)-C(78)  | 0.0    |
| C(83)-C(76)-C(77)-C(100) | 0.0    |
| C(72)-C(76)-C(77)-C(100) | 138.2  |
| C(68)-C(75)-C(78)-C(77)  | 138.2  |
| C(74)-C(75)-C(78)-C(77)  | 0.0    |
| C(68)-C(75)-C(78)-C(105) | 0.0    |

|                           |        |
|---------------------------|--------|
| C(74)-C(75)-C(78)-C(105)  | -138.2 |
| C(76)-C(77)-C(78)-C(75)   | 0.0    |
| C(100)-C(77)-C(78)-C(75)  | -142.6 |
| C(76)-C(77)-C(78)-C(105)  | 142.6  |
| C(100)-C(77)-C(78)-C(105) | 0.0    |
| C(81)-C(79)-C(80)-C(82)   | 0.0    |
| C(90)-C(79)-C(80)-C(82)   | -142.6 |
| C(81)-C(79)-C(80)-C(84)   | 142.6  |
| C(90)-C(79)-C(80)-C(84)   | 0.0    |
| C(80)-C(79)-C(81)-C(73)   | 0.0    |
| C(90)-C(79)-C(81)-C(73)   | 138.2  |
| C(80)-C(79)-C(81)-C(89)   | -138.2 |
| C(90)-C(79)-C(81)-C(89)   | 0.0    |
| C(71)-C(73)-C(81)-C(79)   | 0.0    |
| C(65)-C(73)-C(81)-C(79)   | -142.6 |
| C(71)-C(73)-C(81)-C(89)   | 142.6  |
| C(65)-C(73)-C(81)-C(89)   | 0.0    |
| C(79)-C(80)-C(82)-C(71)   | 0.0    |
| C(84)-C(80)-C(82)-C(71)   | -138.2 |
| C(79)-C(80)-C(82)-C(83)   | 138.2  |
| C(84)-C(80)-C(82)-C(83)   | 0.0    |
| C(73)-C(71)-C(82)-C(80)   | 0.0    |
| C(72)-C(71)-C(82)-C(80)   | 142.6  |
| C(73)-C(71)-C(82)-C(83)   | -142.6 |
| C(72)-C(71)-C(82)-C(83)   | 0.0    |
| C(77)-C(76)-C(83)-C(86)   | 0.0    |
| C(72)-C(76)-C(83)-C(86)   | -142.6 |
| C(77)-C(76)-C(83)-C(82)   | 142.6  |
| C(72)-C(76)-C(83)-C(82)   | 0.0    |
| C(80)-C(82)-C(83)-C(86)   | 0.0    |
| C(71)-C(82)-C(83)-C(86)   | 142.6  |
| C(80)-C(82)-C(83)-C(76)   | -142.6 |
| C(71)-C(82)-C(83)-C(76)   | 0.0    |
| C(82)-C(80)-C(84)-C(85)   | 0.0    |
| C(79)-C(80)-C(84)-C(85)   | -142.6 |
| C(82)-C(80)-C(84)-C(91)   | 142.6  |

|                          |        |
|--------------------------|--------|
| C(79)-C(80)-C(84)-C(91)  | 0.0    |
| C(91)-C(84)-C(85)-C(86)  | -138.2 |
| C(80)-C(84)-C(85)-C(86)  | 0.0    |
| C(91)-C(84)-C(85)-C(96)  | 0.0    |
| C(80)-C(84)-C(85)-C(96)  | 138.2  |
| C(76)-C(83)-C(86)-C(85)  | 138.2  |
| C(82)-C(83)-C(86)-C(85)  | 0.0    |
| C(76)-C(83)-C(86)-C(101) | 0.0    |
| C(82)-C(83)-C(86)-C(101) | -138.2 |
| C(84)-C(85)-C(86)-C(83)  | 0.0    |
| C(96)-C(85)-C(86)-C(83)  | -142.6 |
| C(84)-C(85)-C(86)-C(101) | 142.6  |
| C(96)-C(85)-C(86)-C(101) | 0.0    |
| C(56)-C(58)-C(87)-C(89)  | 0.0    |
| C(59)-C(58)-C(87)-C(89)  | -142.6 |
| C(56)-C(58)-C(87)-C(88)  | 142.6  |
| C(59)-C(58)-C(87)-C(88)  | 0.0    |
| C(89)-C(87)-C(88)-C(90)  | 0.0    |
| C(58)-C(87)-C(88)-C(90)  | -142.6 |
| C(89)-C(87)-C(88)-C(92)  | 142.6  |
| C(58)-C(87)-C(88)-C(92)  | 0.0    |
| C(58)-C(87)-C(89)-C(57)  | 0.0    |
| C(88)-C(87)-C(89)-C(57)  | -138.2 |
| C(58)-C(87)-C(89)-C(81)  | 138.2  |
| C(88)-C(87)-C(89)-C(81)  | 0.0    |
| C(55)-C(57)-C(89)-C(87)  | 0.0    |
| C(65)-C(57)-C(89)-C(87)  | 142.6  |
| C(55)-C(57)-C(89)-C(81)  | -142.6 |
| C(65)-C(57)-C(89)-C(81)  | 0.0    |
| C(79)-C(81)-C(89)-C(87)  | 0.0    |
| C(73)-C(81)-C(89)-C(87)  | -142.6 |
| C(79)-C(81)-C(89)-C(57)  | 142.6  |
| C(73)-C(81)-C(89)-C(57)  | 0.0    |
| C(92)-C(88)-C(90)-C(91)  | 0.0    |
| C(87)-C(88)-C(90)-C(91)  | 138.2  |
| C(92)-C(88)-C(90)-C(79)  | -138.2 |

|                          |        |
|--------------------------|--------|
| C(87)-C(88)-C(90)-C(79)  | 0.0    |
| C(81)-C(79)-C(90)-C(88)  | 0.0    |
| C(80)-C(79)-C(90)-C(88)  | 142.6  |
| C(81)-C(79)-C(90)-C(91)  | -142.6 |
| C(80)-C(79)-C(90)-C(91)  | 0.0    |
| C(88)-C(90)-C(91)-C(94)  | 0.0    |
| C(79)-C(90)-C(91)-C(94)  | 142.6  |
| C(88)-C(90)-C(91)-C(84)  | -142.6 |
| C(79)-C(90)-C(91)-C(84)  | 0.0    |
| C(85)-C(84)-C(91)-C(94)  | 0.0    |
| C(80)-C(84)-C(91)-C(94)  | -142.6 |
| C(85)-C(84)-C(91)-C(90)  | 142.6  |
| C(80)-C(84)-C(91)-C(90)  | 0.0    |
| C(62)-C(59)-C(92)-C(93)  | 0.0    |
| C(58)-C(59)-C(92)-C(93)  | 142.6  |
| C(62)-C(59)-C(92)-C(88)  | -142.6 |
| C(58)-C(59)-C(92)-C(88)  | 0.0    |
| C(90)-C(88)-C(92)-C(93)  | 0.0    |
| C(87)-C(88)-C(92)-C(93)  | -142.6 |
| C(90)-C(88)-C(92)-C(59)  | 142.6  |
| C(87)-C(88)-C(92)-C(59)  | 0.0    |
| C(59)-C(92)-C(93)-C(94)  | -138.2 |
| C(88)-C(92)-C(93)-C(94)  | 0.0    |
| C(59)-C(92)-C(93)-C(112) | 0.0    |
| C(88)-C(92)-C(93)-C(112) | 138.2  |
| C(90)-C(91)-C(94)-C(97)  | -138.2 |
| C(84)-C(91)-C(94)-C(97)  | 0.0    |
| C(90)-C(91)-C(94)-C(93)  | 0.0    |
| C(84)-C(91)-C(94)-C(93)  | 138.2  |
| C(92)-C(93)-C(94)-C(91)  | 0.0    |
| C(112)-C(93)-C(94)-C(91) | -142.6 |
| C(92)-C(93)-C(94)-C(97)  | 142.6  |
| C(112)-C(93)-C(94)-C(97) | 0.0    |
| C(98)-C(95)-C(96)-C(97)  | 0.0    |
| C(101)-C(95)-C(96)-C(97) | -142.6 |
| C(98)-C(95)-C(96)-C(85)  | 142.6  |

|                            |        |
|----------------------------|--------|
| C(101)-C(95)-C(96)-C(85)   | 0.0    |
| C(84)-C(85)-C(96)-C(97)    | 0.0    |
| C(86)-C(85)-C(96)-C(97)    | 142.6  |
| C(84)-C(85)-C(96)-C(95)    | -142.6 |
| C(86)-C(85)-C(96)-C(95)    | 0.0    |
| C(95)-C(96)-C(97)-C(94)    | 138.2  |
| C(85)-C(96)-C(97)-C(94)    | 0.0    |
| C(95)-C(96)-C(97)-C(111)   | 0.0    |
| C(85)-C(96)-C(97)-C(111)   | -138.2 |
| C(91)-C(94)-C(97)-C(96)    | 0.0    |
| C(93)-C(94)-C(97)-C(96)    | -142.6 |
| C(91)-C(94)-C(97)-C(111)   | 142.6  |
| C(93)-C(94)-C(97)-C(111)   | 0.0    |
| C(96)-C(95)-C(98)-C(114)   | 0.0    |
| C(101)-C(95)-C(98)-C(114)  | 138.2  |
| C(96)-C(95)-C(98)-C(102)   | -138.2 |
| C(101)-C(95)-C(98)-C(102)  | 0.0    |
| C(76)-C(77)-C(100)-C(101)  | 0.0    |
| C(78)-C(77)-C(100)-C(101)  | 142.6  |
| C(76)-C(77)-C(100)-C(99)   | -142.6 |
| C(78)-C(77)-C(100)-C(99)   | 0.0    |
| C(102)-C(99)-C(100)-C(101) | 0.0    |
| C(105)-C(99)-C(100)-C(101) | -142.6 |
| C(102)-C(99)-C(100)-C(77)  | 142.6  |
| C(105)-C(99)-C(100)-C(77)  | 0.0    |
| C(77)-C(100)-C(101)-C(86)  | 0.0    |
| C(99)-C(100)-C(101)-C(86)  | 138.2  |
| C(77)-C(100)-C(101)-C(95)  | -138.2 |
| C(99)-C(100)-C(101)-C(95)  | 0.0    |
| C(83)-C(86)-C(101)-C(100)  | 0.0    |
| C(85)-C(86)-C(101)-C(100)  | -142.6 |
| C(83)-C(86)-C(101)-C(95)   | 142.6  |
| C(85)-C(86)-C(101)-C(95)   | 0.0    |
| C(98)-C(95)-C(101)-C(100)  | 0.0    |
| C(96)-C(95)-C(101)-C(100)  | 142.6  |
| C(98)-C(95)-C(101)-C(86)   | -142.6 |

|                             |        |
|-----------------------------|--------|
| C(96)-C(95)-C(101)-C(86)    | 0.0    |
| C(100)-C(99)-C(102)-C(98)   | 0.0    |
| C(105)-C(99)-C(102)-C(98)   | 138.2  |
| C(100)-C(99)-C(102)-C(106)  | -138.2 |
| C(105)-C(99)-C(102)-C(106)  | 0.0    |
| C(95)-C(98)-C(102)-C(99)    | 0.0    |
| C(114)-C(98)-C(102)-C(99)   | -142.6 |
| C(95)-C(98)-C(102)-C(106)   | 142.6  |
| C(114)-C(98)-C(102)-C(106)  | 0.0    |
| C(106)-C(103)-C(104)-C(105) | 0.0    |
| C(109)-C(103)-C(104)-C(105) | -142.6 |
| C(106)-C(103)-C(104)-C(69)  | 142.6  |
| C(109)-C(103)-C(104)-C(69)  | 0.0    |
| C(68)-C(69)-C(104)-C(105)   | 0.0    |
| C(70)-C(69)-C(104)-C(105)   | 142.6  |
| C(68)-C(69)-C(104)-C(103)   | -142.6 |
| C(70)-C(69)-C(104)-C(103)   | 0.0    |
| C(103)-C(104)-C(105)-C(78)  | 138.2  |
| C(69)-C(104)-C(105)-C(78)   | 0.0    |
| C(103)-C(104)-C(105)-C(99)  | 0.0    |
| C(69)-C(104)-C(105)-C(99)   | -138.2 |
| C(75)-C(78)-C(105)-C(104)   | 0.0    |
| C(77)-C(78)-C(105)-C(104)   | -142.6 |
| C(75)-C(78)-C(105)-C(99)    | 142.6  |
| C(77)-C(78)-C(105)-C(99)    | 0.0    |
| C(102)-C(99)-C(105)-C(104)  | 0.0    |
| C(100)-C(99)-C(105)-C(104)  | 142.6  |
| C(102)-C(99)-C(105)-C(78)   | -142.6 |
| C(100)-C(99)-C(105)-C(78)   | 0.0    |
| C(109)-C(103)-C(106)-C(110) | 0.0    |
| C(104)-C(103)-C(106)-C(110) | -138.2 |
| C(109)-C(103)-C(106)-C(102) | 138.2  |
| C(104)-C(103)-C(106)-C(102) | 0.0    |
| C(99)-C(102)-C(106)-C(103)  | 0.0    |
| C(98)-C(102)-C(106)-C(103)  | -142.6 |
| C(99)-C(102)-C(106)-C(110)  | 142.6  |

|                             |        |
|-----------------------------|--------|
| C(98)-C(102)-C(106)-C(110)  | 0.0    |
| C(60)-C(61)-C(108)-C(109)   | 0.0    |
| C(62)-C(61)-C(108)-C(109)   | 142.6  |
| C(60)-C(61)-C(108)-C(107)   | -142.6 |
| C(62)-C(61)-C(108)-C(107)   | 0.0    |
| C(110)-C(107)-C(108)-C(109) | 0.0    |
| C(113)-C(107)-C(108)-C(109) | -142.6 |
| C(110)-C(107)-C(108)-C(61)  | 142.6  |
| C(113)-C(107)-C(108)-C(61)  | 0.0    |
| C(61)-C(108)-C(109)-C(103)  | -138.2 |
| C(107)-C(108)-C(109)-C(103) | 0.0    |
| C(61)-C(108)-C(109)-C(70)   | 0.0    |
| C(107)-C(108)-C(109)-C(70)  | 138.2  |
| C(106)-C(103)-C(109)-C(108) | 0.0    |
| C(104)-C(103)-C(109)-C(108) | 142.6  |
| C(106)-C(103)-C(109)-C(70)  | -142.6 |
| C(104)-C(103)-C(109)-C(70)  | 0.0    |
| C(67)-C(70)-C(109)-C(108)   | 0.0    |
| C(69)-C(70)-C(109)-C(108)   | -142.6 |
| C(67)-C(70)-C(109)-C(103)   | 142.6  |
| C(69)-C(70)-C(109)-C(103)   | 0.0    |
| C(108)-C(107)-C(110)-C(114) | -138.2 |
| C(113)-C(107)-C(110)-C(114) | 0.0    |
| C(108)-C(107)-C(110)-C(106) | 0.0    |
| C(113)-C(107)-C(110)-C(106) | 138.2  |
| C(103)-C(106)-C(110)-C(107) | 0.0    |
| C(102)-C(106)-C(110)-C(107) | -142.6 |
| C(103)-C(106)-C(110)-C(114) | 142.6  |
| C(102)-C(106)-C(110)-C(114) | 0.0    |
| C(96)-C(97)-C(111)-C(114)   | 0.0    |
| C(94)-C(97)-C(111)-C(114)   | -142.6 |
| C(96)-C(97)-C(111)-C(112)   | 142.6  |
| C(94)-C(97)-C(111)-C(112)   | 0.0    |
| C(114)-C(111)-C(112)-C(113) | 0.0    |
| C(97)-C(111)-C(112)-C(113)  | -142.6 |
| C(114)-C(111)-C(112)-C(93)  | 142.6  |

|                             |        |
|-----------------------------|--------|
| C(97)-C(111)-C(112)-C(93)   | 0.0    |
| C(92)-C(93)-C(112)-C(113)   | 0.0    |
| C(94)-C(93)-C(112)-C(113)   | 142.6  |
| C(92)-C(93)-C(112)-C(111)   | -142.6 |
| C(94)-C(93)-C(112)-C(111)   | 0.0    |
| C(111)-C(112)-C(113)-C(62)  | 138.2  |
| C(93)-C(112)-C(113)-C(62)   | 0.0    |
| C(111)-C(112)-C(113)-C(107) | 0.0    |
| C(93)-C(112)-C(113)-C(107)  | -138.2 |
| C(59)-C(62)-C(113)-C(112)   | 0.0    |
| C(61)-C(62)-C(113)-C(112)   | -142.6 |
| C(59)-C(62)-C(113)-C(107)   | 142.6  |
| C(61)-C(62)-C(113)-C(107)   | 0.0    |
| C(110)-C(107)-C(113)-C(112) | 0.0    |
| C(108)-C(107)-C(113)-C(112) | 142.6  |
| C(110)-C(107)-C(113)-C(62)  | -142.6 |
| C(108)-C(107)-C(113)-C(62)  | 0.0    |
| C(112)-C(111)-C(114)-C(98)  | -138.2 |
| C(97)-C(111)-C(114)-C(98)   | 0.0    |
| C(112)-C(111)-C(114)-C(110) | 0.0    |
| C(97)-C(111)-C(114)-C(110)  | 138.2  |
| C(95)-C(98)-C(114)-C(111)   | 0.0    |
| C(102)-C(98)-C(114)-C(111)  | 142.6  |
| C(95)-C(98)-C(114)-C(110)   | -142.6 |
| C(102)-C(98)-C(114)-C(110)  | 0.0    |
| C(107)-C(110)-C(114)-C(111) | 0.0    |
| C(106)-C(110)-C(114)-C(111) | -142.6 |
| C(107)-C(110)-C(114)-C(98)  | 142.6  |
| C(106)-C(110)-C(114)-C(98)  | 0.0    |
| C(53)-O(10)-C(52)-C(51)     | 172.7  |
| C(52)-O(10)-C(53)-C(54)     | 168.3  |

---

Symmetry transformations used to generate equivalent atoms:



## 10.DFT calculations

DFT Calculations were performed on 11 systems using Gaussian16W software. Geometry optimization and frequency calculations were performed on the systems mentioned in the table below. All calculations were in the ground state using B3LYP method and 6-31G(d,p) basis set for all atoms except iodine, which were handled with LanL2DZ basis set. The systems were optimized in chloroform solvent using the PCM solvent model. For each optimized structure, 0 imaginary frequencies were found, indicating the structure optimization had reached a minimum. For the purpose of calculating binding energy, an energy calculation was performed on a Cl atom and a Br atom using the same method and 6-31G(d,p) basis set in chloroform solvent by PCM model. We note that the DFT calculations were performed using a smaller basis set, which may result in a high basis set superposition error. Additionally, dispersion interactions were not included in the calculations. We are currently exploring various methods and basis sets to estimate the accuracy of these results and will report our findings in future work.

The relative binding energies in Table 2 in manuscript are calculated based on the binding energies shown in table below.

| HIM monomer + TBA(X) | Binding Energy (kJ/mol) | I-X Bond Length | Charge I (e <sup>-</sup> ) | Charge X (e <sup>-</sup> ) |
|----------------------|-------------------------|-----------------|----------------------------|----------------------------|
| <b>6a Monomer</b>    |                         |                 | 1.085                      |                            |
| <b>6a- Cl</b>        | -74.4                   | 2.91            | 1.073                      | -0.707                     |
| <b>6a- Br</b>        | 685.6                   | 3.01            | 1.044                      | -0.655                     |
| <b>6b Monomer</b>    |                         |                 | 1.082                      |                            |
| <b>6b- Cl</b>        | -73.8                   | 2.91            | 1.074                      | -0.706                     |
| <b>6b- Br</b>        | 685.8                   | 3.01            | 1.044                      | -0.653                     |
| <b>6c Monomer</b>    |                         |                 | 1.118                      |                            |
| <b>6c-Cl</b>         | -78.4                   | 2.88            | 1.102                      | -0.689                     |
| <b>6c-Br</b>         | 680.8                   | 2.98            | 1.073                      | -0.635                     |

**Table SI2:** Geometry optimization and frequency calculations table.

## HIM monomer 6a-Cl

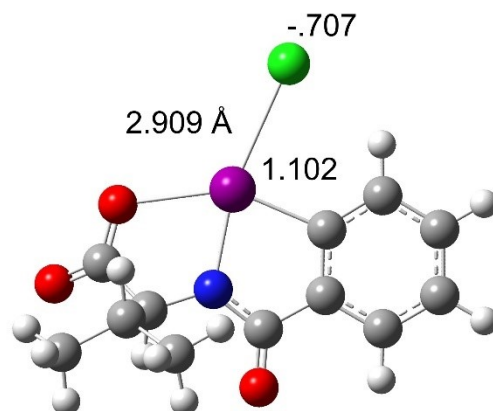

**Figure SI22.** DFT energy minimized structures of **6a**-chloride using B3LYP/6-31G(d,p) functional. Nitrogen, oxygen and iodine atoms are denoted by blue, red and purple color respectively. I-Cl bond distance is 2.909 Å. The charges on the I atom and oxygen atom are 1.102 eV and -0.707 eV respectively.

### Coordinates for DFT Calculated Structure of HIM monomer 6a-Cl

Job Type: geometry optimization and frequency calculation

Method: Ground state, Default spin, DFT, B3LYP

Basis Set: 6-31G(d,p) for all atoms excluding Iodine, LanL2DZ for Iodine

Solvent: Chloroform using PCM solvent model

Total Energy: -1216.607637 Hartree

Number of Imaginary Frequencies: 0

| Center Number | Atomic Number | X        | Y         | Z         |
|---------------|---------------|----------|-----------|-----------|
| 1             | 6             | 2.00175  | -2.929049 | -0.425939 |
| 2             | 6             | 1.215278 | -1.775467 | -0.328993 |
| 3             | 6             | 1.827554 | -0.567134 | -0.010325 |
| 4             | 6             | 3.193123 | -0.456925 | 0.208571  |
| 5             | 6             | 3.964882 | -1.620165 | 0.113023  |
| 6             | 6             | 3.37434  | -2.848743 | -0.204244 |
| 7             | 1             | 1.513692 | -3.866786 | -0.670824 |
| 8             | 1             | 3.63701  | 0.504652  | 0.443015  |
| 9             | 1             | 5.035408 | -1.561397 | 0.286867  |

|    |    |           |           |           |
|----|----|-----------|-----------|-----------|
| 10 | 1  | 3.988359  | -3.741289 | -0.277336 |
| 11 | 6  | -0.264013 | -1.82417  | -0.520971 |
| 12 | 8  | -0.871496 | -2.866787 | -0.793522 |
| 13 | 53 | 0.425455  | 1.080082  | -0.025284 |
| 14 | 7  | -0.861642 | -0.618924 | -0.325495 |
| 15 | 6  | -2.65173  | 0.986253  | -0.92266  |
| 16 | 8  | -1.838284 | 1.923797  | -0.599026 |
| 17 | 6  | -2.949917 | -0.546413 | 1.075148  |
| 18 | 6  | -2.443968 | -1.764578 | 1.860078  |
| 19 | 6  | -4.483044 | -0.580749 | 0.968633  |
| 20 | 1  | -2.663756 | 0.358147  | 1.630896  |
| 21 | 1  | -1.364885 | -1.721349 | 2.03062   |
| 22 | 1  | -2.933433 | -1.805441 | 2.839619  |
| 23 | 1  | -2.663628 | -2.695656 | 1.328603  |
| 24 | 1  | -4.869184 | 0.268912  | 0.402746  |
| 25 | 1  | -4.811842 | -1.496337 | 0.461511  |
| 26 | 1  | -4.933285 | -0.574155 | 1.967262  |
| 27 | 1  | -2.717176 | -1.173342 | -1.012066 |
| 28 | 8  | -3.694297 | 1.112088  | -1.579209 |
| 29 | 6  | -2.303011 | -0.413961 | -0.342109 |
| 30 | 17 | 2.624132  | 2.899178  | 0.537671  |

### HIM monomer 6a-Br

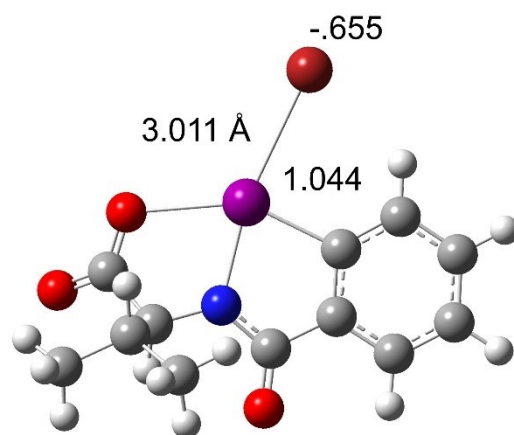

**Figure S123.** DFT energy minimized structures of **6a**-bromide using B3LYP/6-31G(d,p) functional. Nitrogen, oxygen and iodine atoms are denoted by blue, red and purple color respectively. I-Cl bond distance is 3.011 Å. The charges on the I atom and oxygen atom are 1.044 eV and -0.655 eV respectively.

## Coordinates for DFT Calculated Structure of HIM monomer 6a-Br

Job Type: geometry optimization and frequency calculation

Method: Ground state, Default spin, DFT, B3LYP

Basis Set: 6-31G(d,p) for all atoms excluding Iodine, LanL2DZ for Iodine

Solvent: Chloroform using PCM solvent model

Total Energy: -3327.822223 Hartree

Number of Imaginary Frequencies: 0

| Center Number | Atomic Number | X         | Y         | Z         |
|---------------|---------------|-----------|-----------|-----------|
| 1             | 6             | -0.694926 | 3.60332   | -0.365841 |
| 2             | 6             | -0.298486 | 2.262534  | -0.302327 |
| 3             | 6             | -1.260283 | 1.287698  | -0.053676 |
| 4             | 6             | -2.601841 | 1.592259  | 0.126076  |
| 5             | 6             | -2.981219 | 2.93752   | 0.063517  |
| 6             | 6             | -2.034329 | 3.938026  | -0.182655 |
| 7             | 1             | 0.063672  | 4.355481  | -0.556367 |
| 8             | 1             | -3.326115 | 0.804697  | 0.306331  |
| 9             | 1             | -4.025115 | 3.200973  | 0.207206  |
| 10            | 1             | -2.345043 | 4.977348  | -0.231187 |
| 11            | 6             | 1.133858  | 1.869325  | -0.461561 |
| 12            | 8             | 2.032385  | 2.692603  | -0.679987 |
| 13            | 53            | -0.425859 | -0.710041 | -0.105264 |
| 14            | 7             | 1.334437  | 0.536649  | -0.303058 |
| 15            | 6             | 2.572516  | -1.514154 | -0.947171 |
| 16            | 8             | 1.513147  | -2.179736 | -0.667937 |
| 17            | 6             | 3.275772  | -0.209156 | 1.111102  |
| 18            | 6             | 3.145455  | 1.079697  | 1.934476  |
| 19            | 6             | 4.75002   | -0.635306 | 1.019923  |
| 20            | 1             | 2.719637  | -1.002085 | 1.631779  |
| 21            | 1             | 2.10021   | 1.356889  | 2.095491  |
| 22            | 1             | 3.608015  | 0.941853  | 2.918319  |
| 23            | 1             | 3.642122  | 1.917788  | 1.436049  |
| 24            | 1             | 4.87392   | -1.544944 | 0.42937   |
| 25            | 1             | 5.348521  | 0.153129  | 0.546785  |
| 26            | 1             | 5.158602  | -0.806192 | 2.021954  |
| 27            | 1             | 3.284436  | 0.527597  | -0.951828 |
| 28            | 8             | 3.544907  | -1.919765 | -1.599752 |
| 29            | 6             | 2.646334  | -0.093434 | -0.315655 |
| 30            | 35            | -3.157547 | -1.898905 | 0.333447  |

## HIM monomer 6b-Cl

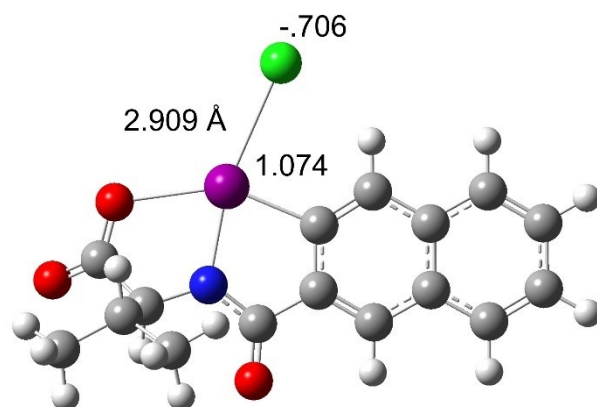

**Figure SI24:** DFT energy minimized structures of **6b**-chloride using B3LYP/6-31G(d,p) functional. Nitrogen, oxygen and iodine atoms are denoted by blue, red and purple color respectively. I-Cl bond distance is 2.909 Å. The charges on the I atom and oxygen atom are 1.074 eV and -0.706 eV respectively.

### Coordinates for DFT Calculated Structure of HIM monomer 6b-Cl

Job Type: geometry optimization and frequency calculation

Method: Ground state, Default spin, DFT, B3LYP

Basis Set: 6-31G(d,p) for all atoms excluding iodine, LanL2DZ for Iodine

Solvent: Chloroform using PCM solvent model

Total Energy: -1370.251804 Hartree

Number of Imaginary Frequencies: 0

| Center Number | Atomic Number | X         | Y         | Z         |
|---------------|---------------|-----------|-----------|-----------|
| 1             | 6             | -0.386726 | -1.683882 | -0.505847 |
| 2             | 8             | -0.603533 | -2.874786 | -0.762132 |
| 3             | 53            | -0.738221 | 1.293118  | -0.04813  |
| 4             | 7             | -1.35994  | -0.755029 | -0.31075  |
| 5             | 6             | -3.599206 | 0.12624   | -0.904528 |
| 6             | 8             | -3.155127 | 1.291602  | -0.604191 |
| 7             | 6             | -3.335647 | -1.395553 | 1.108184  |
| 8             | 6             | -2.43386  | -2.357109 | 1.894591  |
| 9             | 6             | -4.762416 | -1.959949 | 1.015152  |
| 10            | 1             | -3.37683  | -0.443565 | 1.656949  |
| 11            | 1             | -1.43702  | -1.939367 | 2.059411  |
| 12            | 1             | -2.874656 | -2.561388 | 2.876797  |
| 13            | 1             | -2.316525 | -3.308502 | 1.366651  |
| 14            | 1             | -5.420678 | -1.304163 | 0.442584  |

|    |    |           |           |           |
|----|----|-----------|-----------|-----------|
| 15 | 1  | -4.75564  | -2.939458 | 0.521078  |
| 16 | 1  | -5.182841 | -2.096663 | 2.01743   |
| 17 | 1  | -2.91423  | -1.922112 | -0.976428 |
| 18 | 8  | -4.628429 | -0.124853 | -1.545972 |
| 19 | 6  | -2.783563 | -1.060102 | -0.315525 |
| 20 | 6  | 0.988059  | -1.13036  | -0.332025 |
| 21 | 6  | 1.14941   | 0.237333  | -0.023749 |
| 22 | 6  | 2.105044  | -1.934718 | -0.4268   |
| 23 | 6  | 2.373062  | 0.811212  | 0.18202   |
| 24 | 6  | 3.400716  | -1.400608 | -0.217749 |
| 25 | 1  | 1.9701    | -2.986503 | -0.660861 |
| 26 | 6  | 3.53715   | -0.005506 | 0.094531  |
| 27 | 1  | 2.459093  | 1.870955  | 0.401623  |
| 28 | 6  | 4.57205   | -2.203128 | -0.306375 |
| 29 | 6  | 4.837172  | 0.528761  | 0.305601  |
| 30 | 6  | 5.817068  | -1.654494 | -0.096687 |
| 31 | 1  | 4.465448  | -3.25833  | -0.542855 |
| 32 | 6  | 5.950363  | -0.276794 | 0.211785  |
| 33 | 1  | 4.936574  | 1.584577  | 0.541125  |
| 34 | 1  | 6.704785  | -2.276104 | -0.167231 |
| 35 | 1  | 6.938945  | 0.142563  | 0.374243  |
| 36 | 17 | 0.704319  | 3.764957  | 0.471679  |

## HIM monomer 6b-Br

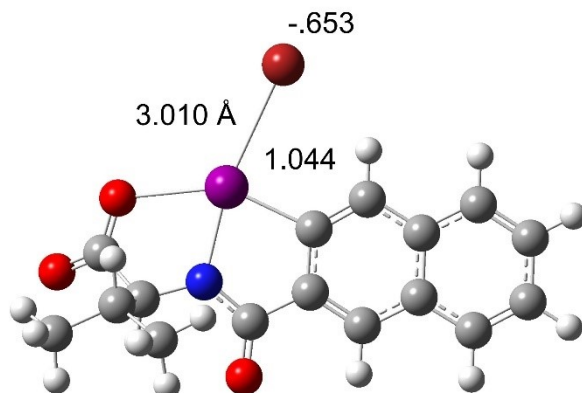

**Figure SI25.** DFT energy minimized structures of **6b**-bromide using B3LYP/6-31G(d,p) functional. Nitrogen, oxygen and iodine atoms are denoted by blue, red and purple color respectively. I-Cl bond distance is 3.010 Å. The charges on the I atom and oxygen atom are 1.044 eV and -0.653 eV respectively.

### Coordinates for DFT Calculated Structure of HIM monomer 6b-Br

Job Type: geometry optimization and frequency calculation

Method: Ground state, Default spin, DFT, B3LYP

Basis Set: 6-31G(d,p) for all atoms excluding iodine, LanL2DZ for iodine

Solvent: Chloroform using PCM solvent model

Total Energy: -3481.46653 Hartree

Number of Imaginary Frequencies: 0

| Center Number | Atomic Number | X         | Y         | Z         |
|---------------|---------------|-----------|-----------|-----------|
| 1             | 6             | -0.53406  | -2.002197 | -0.462761 |
| 2             | 8             | -0.799969 | -3.194707 | -0.66397  |
| 3             | 53            | -0.744123 | 1.014018  | -0.13006  |
| 4             | 7             | -1.461906 | -1.024447 | -0.307839 |
| 5             | 6             | -3.663741 | -0.076575 | -0.941044 |
| 6             | 8             | -3.179622 | 1.08468   | -0.695589 |
| 7             | 6             | -3.451402 | -1.488067 | 1.156144  |
| 8             | 6             | -2.594463 | -2.453597 | 1.986526  |
| 9             | 6             | -4.908443 | -1.97507  | 1.106615  |
| 10            | 1             | -3.433881 | -0.50654  | 1.651369  |
| 11            | 1             | -1.574958 | -2.082037 | 2.12022   |
| 12            | 1             | -3.034688 | -2.5817   | 2.981833  |
| 13            | 1             | -2.532987 | -3.436811 | 1.509766  |
| 14            | 1             | -5.537043 | -1.312491 | 0.509094  |
| 15            | 1             | -4.963267 | -2.976411 | 0.661587  |
| 16            | 1             | -5.323046 | -2.038138 | 2.118684  |

|    |    |           |           |           |
|----|----|-----------|-----------|-----------|
| 17 | 1  | -3.074378 | -2.154997 | -0.895594 |
| 18 | 8  | -4.698178 | -0.323813 | -1.577567 |
| 19 | 6  | -2.897096 | -1.262672 | -0.287917 |
| 20 | 6  | 0.865726  | -1.501616 | -0.318134 |
| 21 | 6  | 1.09416   | -0.13107  | -0.068296 |
| 22 | 6  | 1.942893  | -2.361344 | -0.38165  |
| 23 | 6  | 2.345511  | 0.389667  | 0.111258  |
| 24 | 6  | 3.263827  | -1.883572 | -0.196757 |
| 25 | 1  | 1.755104  | -3.413869 | -0.571824 |
| 26 | 6  | 3.468635  | -0.485345 | 0.057498  |
| 27 | 1  | 2.487812  | 1.451726  | 0.28758   |
| 28 | 6  | 4.394188  | -2.745504 | -0.252166 |
| 29 | 6  | 4.793559  | -0.00705  | 0.24695   |
| 30 | 6  | 5.664939  | -2.250377 | -0.064841 |
| 31 | 1  | 4.235462  | -3.803052 | -0.444847 |
| 32 | 6  | 5.865855  | -0.869395 | 0.18717   |
| 33 | 1  | 4.945111  | 1.051352  | 0.439484  |
| 34 | 1  | 6.521072  | -2.91708  | -0.109242 |
| 35 | 1  | 6.873997  | -0.492724 | 0.333238  |
| 36 | 35 | 0.795691  | 3.563839  | 0.305205  |

#### HIM monomer 6c-Cl

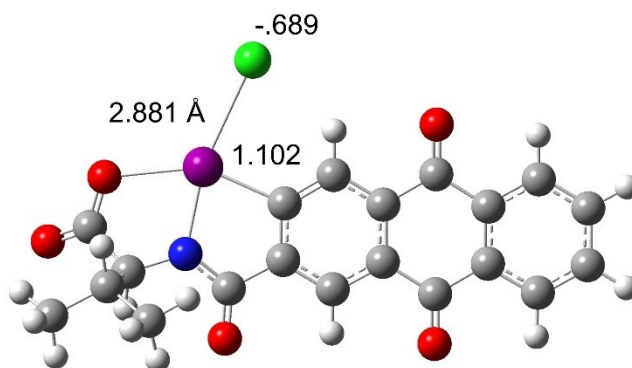

**Figure SI26:** DFT energy minimized structures of **6c**-chloride using B3LYP/6-31G(d,p) functional. Nitrogen, oxygen and iodine atoms are denoted by blue, red and purple color respectively. I-Cl bond distance is 2.881 Å. The charges on the I atom and oxygen atom are 1.102 eV and -0.689 eV respectively.



## Coordinates for DFT Calculated Structure of HIM monomer 6C-Cl

Job Type: geometry optimization and frequency calculation

Method: Ground state, Default spin, DFT, B3LYP

Basis Set: 6-31G(d,p) for all atoms excluding Iodine, LanL2DZ for Iodine

Solvent: Chloroform using PCM solvent model

Total Energy: -1673.13186 Hartree

Number of Imaginary Frequencies: 0

| Center Number | Atomic Number | X         | Y         | Z         |
|---------------|---------------|-----------|-----------|-----------|
| 1             | 6             | -1.338783 | -1.653972 | -0.453534 |
| 2             | 8             | -1.432273 | -2.86718  | -0.669955 |
| 3             | 53            | -1.960455 | 1.294174  | -0.100014 |
| 4             | 7             | -2.389032 | -0.815385 | -0.271326 |
| 5             | 6             | -4.703937 | -0.157525 | -0.852236 |
| 6             | 8             | -4.35319  | 1.052197  | -0.59898  |
| 7             | 6             | -4.281134 | -1.596851 | 1.191409  |
| 8             | 6             | -3.278103 | -2.434489 | 1.996659  |
| 9             | 6             | -5.641897 | -2.309369 | 1.130134  |
| 10            | 1             | -4.416843 | -0.637602 | 1.711359  |
| 11            | 1             | -2.329814 | -1.909768 | 2.141041  |
| 12            | 1             | -3.689247 | -2.654079 | 2.988197  |
| 13            | 1             | -3.064852 | -3.383873 | 1.496092  |
| 14            | 1             | -6.368269 | -1.747344 | 0.540417  |
| 15            | 1             | -5.534685 | -3.300505 | 0.672318  |
| 16            | 1             | -6.040621 | -2.451909 | 2.140331  |
| 17            | 1             | -3.839276 | -2.138532 | -0.885926 |
| 18            | 8             | -5.722801 | -0.511694 | -1.457498 |
| 19            | 6             | -3.778073 | -1.250908 | -0.248858 |
| 20            | 6             | 7.373056  | 0.289337  | 0.247932  |
| 21            | 6             | 6.175359  | 0.995828  | 0.32813   |
| 22            | 6             | 4.954064  | 0.334758  | 0.150769  |
| 23            | 6             | 4.941436  | -1.050655 | -0.108917 |
| 24            | 6             | 6.150213  | -1.752746 | -0.187288 |
| 25            | 6             | 7.360517  | -1.08667  | -0.01013  |
| 26            | 6             | 3.689005  | 1.117821  | 0.241483  |
| 27            | 6             | 3.661846  | -1.78803  | -0.302952 |
| 28            | 6             | 2.393904  | -1.006386 | -0.21614  |
| 29            | 6             | 2.405185  | 0.381996  | 0.039382  |
| 30            | 6             | 1.203302  | 1.100717  | 0.109105  |
| 31            | 1             | 1.219463  | 2.169983  | 0.292253  |
| 32            | 6             | 0.015409  | 0.410896  | -0.064434 |
| 33            | 6             | -0.020006 | -0.960893 | -0.31473  |
| 34            | 6             | 1.178381  | -1.669708 | -0.391764 |
| 35            | 1             | 8.31716   | 0.807451  | 0.385793  |
| 36            | 1             | 6.161851  | 2.061853  | 0.526827  |

|    |   |          |           |           |
|----|---|----------|-----------|-----------|
| 37 | 1 | 6.117324 | -2.81802  | -0.387956 |
| 38 | 1 | 8.294904 | -1.636065 | -0.072499 |

### HIM monomer 6c-Br

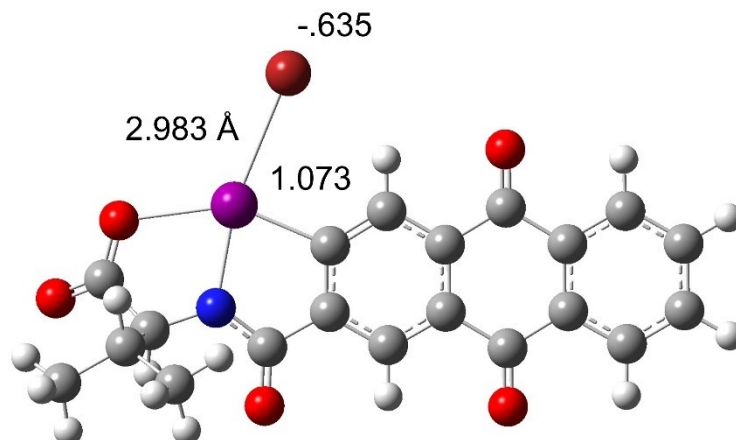

**Figure SI27:** DFT energy minimized structures of **6c**-bromide using B3LYP/6-31G(d,p) functional. Nitrogen, oxygen and iodine atoms are denoted by blue, red and purple color respectively. I-Cl bond distance is 2.983 Å. The charges on the I atom and oxygen atom are 1.073 eV and -0.635 eV respectively.

### Coordinates for DFT Calculated Structure of HIM monomer 6c-Br

Job Type: geometry optimization and frequency calculation

Method: Ground state, Default spin, DFT, B3LYP

Basis Set: 6-31G(d,p) for all atoms excluding Iodine, LanL2DZ for Iodine

Solvent: Chloroform using PCM solvent model

Total Energy: -3784.346757 Hartree

Number of Imaginary Frequencies: 0

| Center Number | Atomic Number | X         | Y         | Z         |
|---------------|---------------|-----------|-----------|-----------|
| 1             | 6             | -1.242669 | -1.968214 | -0.430173 |
| 2             | 8             | -1.3005   | -3.188762 | -0.622685 |
| 3             | 53            | -1.92831  | 0.983466  | -0.137531 |
| 4             | 7             | -2.311125 | -1.152729 | -0.268636 |
| 5             | 6             | -4.641045 | -0.559872 | -0.87398  |
| 6             | 8             | -4.328445 | 0.662836  | -0.639188 |
| 7             | 6             | -4.194288 | -1.955773 | 1.193924  |
| 8             | 6             | -3.173003 | -2.745811 | 2.023983  |

|    |   |           |           |           |
|----|---|-----------|-----------|-----------|
| 9  | 6 | -5.531052 | -2.712462 | 1.133657  |
| 10 | 1 | -4.365281 | -0.991983 | 1.694748  |
| 11 | 1 | -2.243773 | -2.18767  | 2.167106  |
| 12 | 1 | -3.586583 | -2.96076  | 3.015609  |
| 13 | 1 | -2.92387  | -3.696439 | 1.54274   |
| 14 | 1 | -6.268688 | -2.184019 | 0.527154  |
| 15 | 1 | -5.387811 | -3.707588 | 0.69465   |
| 16 | 1 | -5.935026 | -2.849922 | 2.142568  |
| 17 | 1 | -3.726343 | -2.519364 | -0.871044 |
| 18 | 8 | -5.646589 | -0.954563 | -1.478503 |
| 19 | 6 | -3.689115 | -1.619914 | -0.248449 |
| 20 | 6 | 7.426129  | 0.17932   | 0.216686  |
| 21 | 6 | 6.214065  | 0.862926  | 0.276669  |
| 22 | 6 | 5.00661   | 0.171379  | 0.122214  |
| 23 | 6 | 5.022585  | -1.221495 | -0.093586 |
| 24 | 6 | 6.245615  | -1.90041  | -0.152094 |
| 25 | 6 | 7.441998  | -1.204073 | 0.00195   |
| 26 | 6 | 3.725382  | 0.930124  | 0.190301  |
| 27 | 6 | 3.75834   | -1.991397 | -0.261485 |
| 28 | 6 | 2.474711  | -1.233505 | -0.200563 |
| 29 | 6 | 2.457463  | 0.161427  | 0.014938  |
| 30 | 6 | 1.240822  | 0.856153  | 0.066922  |
| 31 | 1 | 1.236939  | 1.930197  | 0.222204  |
| 32 | 6 | 0.06675   | 0.138763  | -0.086921 |

### Coordinates for DFT Calculated Structure of HIM 6a monomer (without anions)

Job Type: geometry optimization and frequency calculation

Method: Ground state, Default spin, DFT, B3LYP

Basis Set: 6-31G(d,p) for all atoms excluding Iodine, LanL2DZ for Iodine

Solvent: Chloroform using PCM solvent model

Total Energy: -756.233551 Hartree

Number of Imaginary Frequencies: 0

| Center Number | Atomic Number | X         | Y         | Z         |
|---------------|---------------|-----------|-----------|-----------|
| 1             | 6             | -2.918791 | 1.872623  | -0.546238 |
| 2             | 6             | -1.842108 | 0.998179  | -0.361833 |
| 3             | 6             | -2.081044 | -0.276683 | 0.138391  |
| 4             | 6             | -3.354537 | -0.72738  | 0.45515   |
| 5             | 6             | -4.423117 | 0.157264  | 0.270904  |

|    |    |           |           |           |
|----|----|-----------|-----------|-----------|
| 6  | 6  | -4.206455 | 1.447382  | -0.227244 |
| 7  | 1  | -2.724585 | 2.867638  | -0.932389 |
| 8  | 1  | -3.528384 | -1.728887 | 0.835132  |
| 9  | 1  | -5.429406 | -0.166603 | 0.518027  |
| 10 | 1  | -5.047354 | 2.119234  | -0.365631 |
| 11 | 6  | -0.440398 | 1.40349   | -0.652849 |
| 12 | 8  | -0.116459 | 2.502989  | -1.098367 |
| 13 | 53 | -0.283887 | -1.462033 | 0.214794  |
| 14 | 7  | 0.483951  | 0.443287  | -0.325036 |
| 15 | 6  | 2.58315   | -0.789037 | -0.753325 |
| 16 | 8  | 1.964837  | -1.824922 | -0.279782 |
| 17 | 6  | 2.582111  | 1.13689   | 0.8925    |
| 18 | 6  | 1.777338  | 2.278749  | 1.528515  |
| 19 | 6  | 4.024971  | 1.588418  | 0.614253  |
| 20 | 1  | 2.612377  | 0.30478   | 1.610564  |
| 21 | 1  | 0.772225  | 1.961027  | 1.818757  |
| 22 | 1  | 2.288478  | 2.625583  | 2.432574  |
| 23 | 1  | 1.681082  | 3.126045  | 0.843528  |
| 24 | 1  | 4.619185  | 0.79514   | 0.158007  |
| 25 | 1  | 4.032697  | 2.449602  | -0.064547 |
| 26 | 1  | 4.506682  | 1.896166  | 1.547889  |
| 27 | 1  | 2.119453  | 1.247673  | -1.25872  |
| 28 | 8  | 3.649967  | -0.817245 | -1.360355 |
| 29 | 6  | 1.927071  | 0.576904  | -0.415552 |

### Coordinates for DFT Calculated Structure of HIM monomer 6b (without anions)

Job Type: geometry optimization and frequency calculation

Method: Ground state, Default spin, DFT, B3LYP

Basis Set: 6-31G(d,p) for all atoms excluding Iodine, LanL2DZ for Iodine

Solvent: Chloroform using PCM solvent model

Total Energy: -909.87796 Hartree

Number of Imaginary Frequencies: 0

| Center Number | Atomic Number | X        | Y         | Z         |
|---------------|---------------|----------|-----------|-----------|
| 1             | 6             | 0.264034 | 1.306073  | -0.618858 |
| 2             | 8             | 0.471283 | 2.449472  | -1.022532 |
| 3             | 53            | 0.736473 | -1.560341 | 0.136314  |
| 4             | 7             | 1.286712 | 0.450416  | -0.290411 |
| 5             | 6             | 3.52189  | -0.515507 | -0.738144 |
| 6             | 8             | 3.020265 | -1.635414 | -0.32254  |

|    |   |           |           |           |
|----|---|-----------|-----------|-----------|
| 7  | 6 | 3.281269  | 1.340806  | 0.969267  |
| 8  | 6 | 2.334751  | 2.345521  | 1.640402  |
| 9  | 6 | 4.654281  | 1.983956  | 0.716793  |
| 10 | 1 | 3.416526  | 0.493442  | 1.656609  |
| 11 | 1 | 1.378919  | 1.889702  | 1.912456  |
| 12 | 1 | 2.795125  | 2.723343  | 2.55923   |
| 13 | 1 | 2.130878  | 3.196736  | 0.984379  |
| 14 | 1 | 5.344575  | 1.291464  | 0.232721  |
| 15 | 1 | 4.551477  | 2.865179  | 0.072248  |
| 16 | 1 | 5.0926    | 2.313793  | 1.664232  |
| 17 | 1 | 2.824652  | 1.467778  | -1.181992 |
| 18 | 8 | 4.596702  | -0.393493 | -1.319221 |
| 19 | 6 | 2.705093  | 0.751101  | -0.363363 |
| 20 | 6 | -1.086999 | 0.736334  | -0.373627 |
| 21 | 6 | -1.187964 | -0.591774 | 0.088621  |
| 22 | 6 | -2.234793 | 1.482585  | -0.545398 |
| 23 | 6 | -2.385321 | -1.187968 | 0.374009  |
| 24 | 6 | -3.504469 | 0.92131   | -0.261254 |
| 25 | 1 | -2.150008 | 2.506766  | -0.895762 |
| 26 | 6 | -3.584099 | -0.434496 | 0.208635  |
| 27 | 1 | -2.451524 | -2.215555 | 0.72031   |
| 28 | 6 | -4.706124 | 1.664044  | -0.426209 |
| 29 | 6 | -4.859495 | -0.990723 | 0.493407  |
| 30 | 6 | -5.926691 | 1.095143  | -0.141893 |
| 31 | 1 | -4.64212  | 2.688745  | -0.780849 |
| 32 | 6 | -6.003123 | -0.242573 | 0.321192  |
| 33 | 1 | -4.918814 | -2.01572  | 0.848156  |
| 34 | 1 | -6.838502 | 1.669867  | -0.271556 |
| 35 | 1 | -6.973254 | -0.677904 | 0.540883  |

**Coordinates for DFT Calculated Structure of HIM monomer 6c (without anions)**

Job Type: geometry optimization and frequency calculation

Method: Ground state, Default spin, DFT, B3LYP

Basis Set: 6-31G(d,p) for all atoms excluding Iodine, LanL2DZ for Iodine

Solvent: Chloroform using PCM solvent model

Total Energy: -1212.756261 Hartree

Number of Imaginary Frequencies: 0

| Center Number | Atomic Number | X         | Y         | Z         |
|---------------|---------------|-----------|-----------|-----------|
| 1             | 6             | 1.409603  | 1.341434  | -0.505864 |
| 2             | 8             | 1.564532  | 2.526225  | -0.790765 |
| 3             | 53            | 1.983617  | -1.566437 | -0.018819 |
| 4             | 7             | 2.457147  | 0.49272   | -0.260411 |
| 5             | 6             | 4.724134  | -0.349294 | -0.755232 |
| 6             | 8             | 4.250914  | -1.520936 | -0.454716 |
| 7             | 6             | 4.391657  | 1.307447  | 1.134305  |
| 8             | 6             | 3.420898  | 2.251473  | 1.857173  |
| 9             | 6             | 5.774838  | 1.964141  | 0.998426  |
| 10            | 1             | 4.49773   | 0.39864   | 1.743902  |
| 11            | 1             | 2.454194  | 1.778914  | 2.050703  |
| 12            | 1             | 3.845933  | 2.540835  | 2.82371   |
| 13            | 1             | 3.244935  | 3.160837  | 1.275298  |
| 14            | 1             | 6.489499  | 1.312637  | 0.493451  |
| 15            | 1             | 5.702734  | 2.89568   | 0.424656  |
| 16            | 1             | 6.166698  | 2.213198  | 1.989694  |
| 17            | 1             | 3.977051  | 1.650185  | -1.003037 |
| 18            | 8             | 5.798697  | -0.145299 | -1.309266 |
| 19            | 6             | 3.8659    | 0.847383  | -0.267286 |
| 20            | 6             | -7.323296 | -0.464712 | 0.294718  |
| 21            | 6             | -6.131858 | -1.17729  | 0.408301  |
| 22            | 6             | -4.905174 | -0.535264 | 0.1999    |
| 23            | 6             | -4.880308 | 0.837516  | -0.125704 |
| 24            | 6             | -6.083073 | 1.54471   | -0.237108 |
| 25            | 6             | -7.298778 | 0.897191  | -0.028153 |
| 26            | 6             | -3.649878 | -1.320596 | 0.327685  |
| 27            | 6             | -3.597349 | 1.555811  | -0.355414 |
| 28            | 6             | -2.331576 | 0.769347  | -0.230892 |
| 29            | 6             | -2.357985 | -0.602346 | 0.093044  |
| 30            | 6             | -1.164405 | -1.328945 | 0.201279  |
| 31            | 1             | -1.218415 | -2.384402 | 0.445847  |
| 32            | 6             | 0.028258  | -0.660182 | -0.00739  |
| 33            | 6             | 0.077276  | 0.69454   | -0.329349 |
| 34            | 6             | -1.110785 | 1.415062  | -0.441531 |
| 35            | 1             | -8.271631 | -0.967364 | 0.456933  |
| 36            | 1             | -6.129103 | -2.232665 | 0.657573  |
| 37            | 1             | -6.042932 | 2.59891   | -0.488038 |
| 38            | 1             | -8.228262 | 1.450927  | -0.116338 |
| 39            | 1             | -1.086907 | 2.470564  | -0.687715 |
| 40            | 8             | -3.567557 | 2.749129  | -0.637766 |
| 41            | 8             | -3.656816 | -2.514036 | 0.613539  |

**DFT Calculated Energy of Chlorine**

Job Type: energy

Method: Ground state, Default spin, DFT, B3LYP

Basis Set: 6-31G(d,p)

Solvent: Chloroform using PCM solvent model

Total Energy: -460.34574 Hartree

**DFT Calculated Energy of Bromine**

Job Type: energy

Method: Ground state, Default spin, DFT, B3LYP

Basis Set: 6-31G(d,p)

Solvent: Chloroform using PCM solvent model

Total Energy: -2571.849795 Hartree
